# Supplementary material for: Deep sequencing of small RNAs identifies canonical and non-canonical miRNA and endogenous siRNAs in mammalian somatic tissues
Source: PubMed Central journal article supplement — Nucleic Acids Res. 2013 Jan 15;41(5):3339–51. doi: 10.1093/nar/gks1474 (PMC3597668; doi:10.1093/nar/gks1474), 2013-01-15
Supplement: supp_gks1474_nar-01817-a-2012-File011.pdf [file supp_gks1474_nar-01817-a-2012-File011.pdf]

## **Supplemental figure and table legends**

**Figure S1.** Flow chart describing the major components of each approach used in this study and the classes of the discovered miRNAs.

**Figure S2.** Small RNA reads distribution across SINE RNAs localized on two different chromosomal locations and mapping of the more represented reads on the RNA secondary structures predicted for the SINE elements analyzed. Tissues analyzed: mESCs, pancreas, heart, liver, skin, spleen, testes, lung, NIH3T3 cells.

**Figure S3.** Small RNA reads distribution and predicted RNA secondary structure of all the new identified miRNAs. li1, E18.5 ko Ago2 liver; li2, E18.5 wt liver; li3, adult liver; hr1, heart replicate 1 (rep1) ; hr2, heart replicate 2 (rep2); hr3, heart replicate 3 (rep3); 3Ta, Ago2-IP small RNA from NIH3T3; 3T3, NIH3T3; mE1, wt mESCs; mED, Dicer -/- mESCs; mE8 Dgcr8 -/- mESCs; te1, testes rep1; te2, testes rep2; hi1, hippocampus rep1; hi2, hippocampus rep2; Am1, Ago2-Clip-sq small RNA from mESCs rep1; Am2, Ago2-Clip-sq small RNA from mESCs rep2; SSC, spermatogonial stem cells-enriched germ cell culture; Tp1, freshly isolated spermatogonial stem cells rep1; Tp2, freshly isolated spermatogonial stem cells rep2; Tm1, somatic cell-enriched testis cell populations rep1; Tm2, somatic cell-enriched testis cell populations rep2; bm1, bone marrow rep1; bm2, bone marrow rep2; lun, lung; pan, pancreas; nt1, neutrophils rep1; nt2, neutrophils rep2; E15, E15.5 stage brain; cx1, cortex; skn, skin; sp1, spleen rep1; sp2 spleen rep2; CFU, CFU-Eerythroid progenitors; oo1, oocytes rep1; oo2, oocytes rep2; ut1, utero rep1; ut2 utero rep2; ov1, ovary rep1; ov2, ovary rep2; br1, whole brain rep1; br2, whole brain rep2; nb1, newborn rep1; nb2, newborn rep2; nb3, newborn rep3; ay1, embryo 7.5 days rep1; ay2, embryo 7.5 days rep2; ay3, embryo 7.5 days rep3; mm1, embryo 9.5 days rep1; mm2, embryo 9.5 days rep2; mm3, embryo 9.5 days rep3; em1, embryo 12.5 days rep1; em2, embryo 12.5 days rep2; em3, embryo 12.5 days rep3; pob, pro B cells; peb pre B cells; imb, immature B cells; nt4 B1 B cells; mzb, marginal zone B cells; gcb, marginal center B cells; pc1, plasma cells; bas, basophils, bone marrow cells; mdc, macrophage derived dendritic cells from bone marrow; mbm, macrophages from bone marrow; nkc, NK cells, 48t CD4+CD8+ T cells; nct, naïve CD4+; c8t, CD8+ T cells; c4t, CD4+ T cells; th2, Th2 cells; th7 Th7 cells; itr, iTreg cells; ntr, nTreg cells; kdn, Kidney cells; mus, muscle cells; sgl, cells from salivary gland; bac, B activated cells; gc2, Germinal center B cells; hlc, HL1 cells; hl2, HL1 siSrf2; hl1, HL1 sirf1; t11, Ter119+ erythroblasts; co1, colon rep1; co2 colon rep2; je1, jejunum rep1; je2, jejunum rep2; pgr, primary granulocyte.

**Table S1.** Datasets and samples from NCBI Gene expression omnibus (GEO) and The Read Archive Database (SRA) that have been used in this study.

**Table S2.**

Sheet 1. Normalized reads corresponding to Dgcr8-independent, Dicer-dependent annotated miRNAs derived from mESC wild type, Dicer -/-, Dgcr8 -/- total RNA samples (1) and mESC wild type and Dicer -/- RNA samples from Ago2 CLIP-seq experiment (2).

Sheet 2. Normalized reads corresponding to Dicer-independent annotated miRNAs derived from mESC wild type, Dicer -/-, Dgcr8 -/- total RNA samples, mESC wild type and Dicer -/- RNA samples from Ago2 CLIP-seq experiment and

total RNA sample derived from embryonic liver stage 18.5 wild type and expressing a catalytically inactive Ago2 protein (3).

**Table S3.** Mouse miRNA precursors that contain genomic repeats.

**Table S4.** Summary of novel identified miRNAs.

**Table S5.** Normalized reads of novel miRNAs from NIH3T3, Ago2 IP from NIH3T3, mESCs WT, mESCs Dicer  $-/-$ , mESCs Dgcr8  $-/-$ , CLIP of mESCs replicate 1 and 2.

**Table S6.** Expression profile of novel miRNAs across adult and embryonic tissues. The table contains the sum of normalized reads derived from candidate miRNAs.

## Supplemental Figure S1



Download of publicly available datasets of small RNA sequencing

Bioinformatics processing of the sequenced reads

Use of Dicer KO and Dgcr8 KO datasets in conjunction with updated miRBase-miRNA annotation to redefine miRNA biogenesis processes and discover erroneous annotations

*miR-3062* is a 2-tailed mirtron, *miR-1965* is an endo-siRNA. A group of annotated miRNAs do not show characteristics of miRNA biogenesis and should be removed from the miRBase database

Several miRNA classes has been identified: tailed mirtrons, miRNAs derived from repeats, candidate shRNAs, miRNAs derived from coding genes and canonical miRNAs

Use of the processed reads to identify novel miRNAs in the data (66 novel loci coding for miRNAs identified using this approach)

Use of Dicer KO and Dgcr8 KO datasets to define the biogenesis process of the novel miRNAs identified with this study

Overexpression in cells of a group of hairpins coding for the novel miRNAs, followed by small RNA sequencing to verify their processing within cells

Quantification of the novel identified miRNAs in several tissues

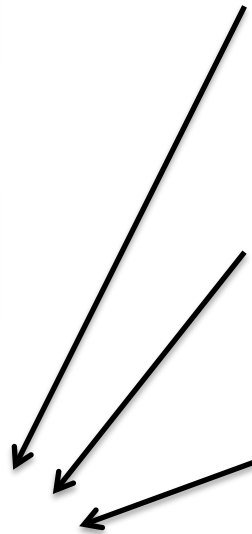

## Supplemental Figure S2







.....ucccgagugcuggaauuaaagg..... 18  
.....cggagugcuggaauuaaaggcau..... 1  
.....cgagugcuggaauuaaa..... 1  
.....cgagugcuggaauuaaag..... 1  
.....cgagugcuggaauuaaagg..... 52  
.....cgagugcuggaauuaaaggc..... 4  
.....cgagugcuggaauuaaaggca..... 56  
.....cgagugcuggaauuaaaggcau..... 125  
.....cgagugcuggaauuaaaggcaug..... 24  
.....gagugcuggaauuaaag..... 11  
.....gagugcuggaauuaaagg..... 177  
.....gagugcuggaauuaaaggc..... 13  
.....gagugcuggaauuaaaggca..... 132  
.....gagugcuggaauuaaaggcau..... 187  
.....gagugcuggaauuaaaggcaug..... 174  
.....gagugcuggaauuaaaggcaugc..... 3  
.....agugcuggaauuaaagg..... 70  
.....agugcuggaauuaaaggc..... 7  
.....agugcuggaauuaaaggca..... 35  
.....agugcuggaauuaaaggcau..... 54  
.....agugcuggaauuaaaggcaug..... 19  
.....agugcuggaauuaaaggcaugc..... 6  
.....gugcuggaauuaaaggc..... 3  
.....gugcuggaauuaaaggca..... 15  
.....gugcuggaauuaaaggcau..... 27  
.....uggaauuaaaggcaugc..... 1  
.....caugcgccacuacugcc..... 1  
.....caugcgccacuacugccc..... 1  
.....caugcgccacuacugcccg..... 3  
.....caugcgccacuacugcccg..... 5  
.....caugcgccacuacugcccg..... 2  
.....caugcgccacuacugcccg..... 10  
.....caugcgccacuacugcccg..... 9  
.....caugcgccacuacugcccg..... 3  
.....augcgccacuacugcccg..... 2  
.....augcgccacuacugcccg..... 1  
.....ugcgccacuacugcccg..... 1  
.....ugcgccacuacugcccg..... 2  
.....ugcgccacuacugcccg..... 1  
.....ugcgccacuacugcccg..... 3  
.....ugcgccacuacugcccg..... 1  
.....ugcgccacuacugcccg..... 1  
.....ugcgccacuacugcccg..... 1  
.....gcgccacuacugcccg..... 1  
.....gcgccacuacugcccg..... 1  
.....gcgccacuacugcccg..... 3  
.....gcgccacuacugcccg..... 1  
.....cgccacuacugcccg..... 18  
.....cgccacuacugcccg..... 7  
.....cgccacuacugcccg..... 55  
.....cgccacuacugcccg..... 137  
.....cgccacuacugcccg..... 209  
.....cgccacuacugcccg..... 79  
.....cgccacuacugcccg..... 3  
.....gccacuacugcccg..... 4  
.....gccacuacugcccg..... 1  
.....gccacuacugcccg..... 11  
.....gccacuacugcccg..... 13  
.....gccacuacugcccg..... 1  
.....gccacuacugcccg..... 2  
.....ccacuacugcccg..... 1  
.....ccacuacugcccg..... 2  
.....ccacuacugcccg..... 5  
.....cacuacugcccg..... 5  
.....cacuacugcccg..... 2  
.....cacuacugcccg..... 3  
.....acuacugcccg..... 8

chr4:119078623-119078903 (-)

aggccgggcgugguggcgcac x1 (x2 Ago2-CLIP mESC)  
ccuuuaucucgacacuugga x32 (x3 Ago2-CLIP mESC)  
aaagcagagguagauggacuuc x15 (x29 Ago2-CLIP mESC)  
ugaguucgaggccagccugcuc x37 (x7 Ago2-CLIP mESC)  
uacaaagugaguuccaguguuc x7  
uccuggaauucacuuuguaga x1  
gagcaggcuggccucgaacuca x2 (x1 Ago2-CLIP mESC)  
gaaguccgccugccucugccu x1  
aagugccgagauuaaaggcgu 105 (x2 Ago2-CLIP mESC)  
ugcgccaccgcgcccggc x48 (x1 Ago2-CLIP mESC)

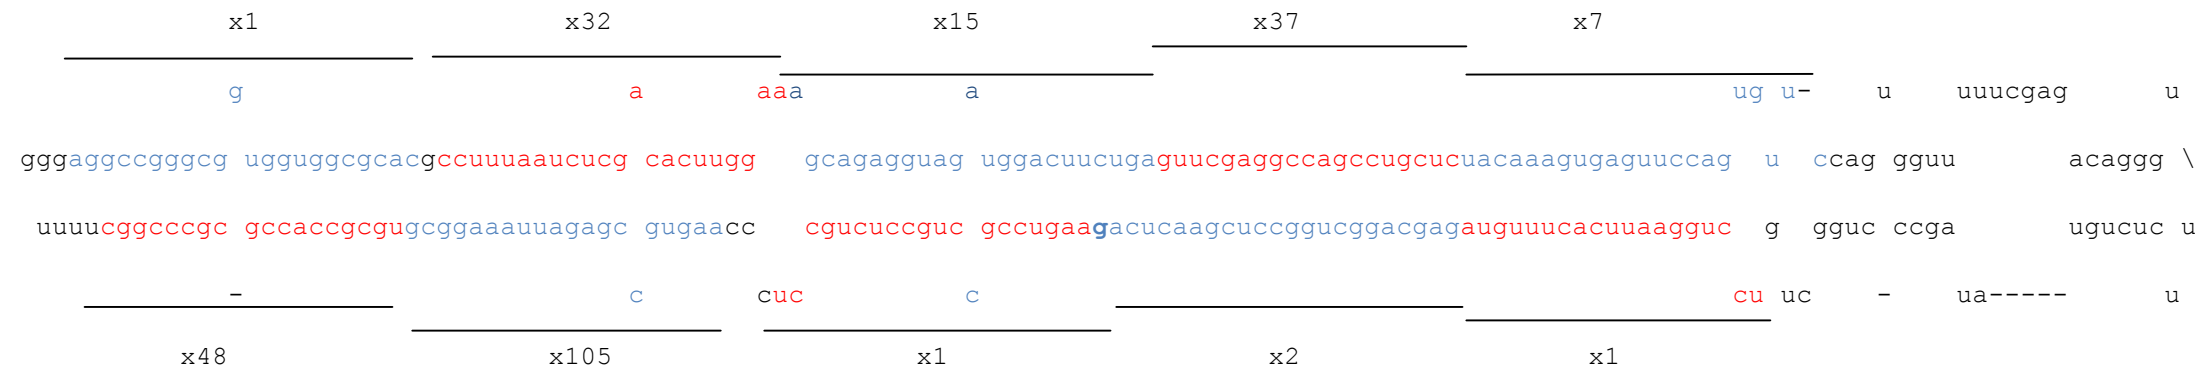

chr7:87297607-87297814(-)

aagccggggccguaguggcgca x374 (miR-1965) (x95 Ago2-CLIP mESC) agccuuuaauucaguacuugg x2571

aggcagaggcuggcggaucucu x2 (x2510 Ago2-CLIP mESC)

aaaucuaccugccucugccucc x964 (miR-1935) (x61 Ago2-CLIP mESC)

gagugcuggaauuaaaggcau x187 (miR-1196) (x151 Ago2-CLIP mESC)

cgccacuacugcccggcuccu x209 (x16 Ago2-CLIP mESC)

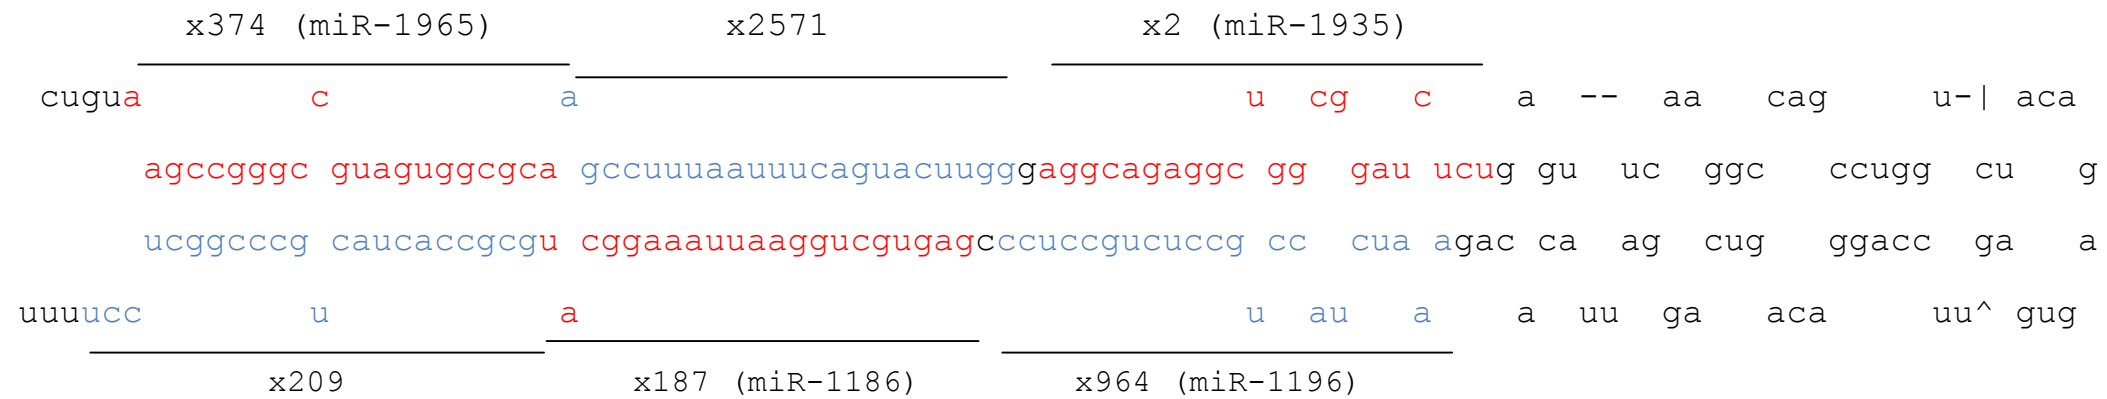









chr7:87297607-87297814(-)

aagccgggcccguaguggcgca x16 miR-1965

x16 (miR-1965)

cugua c a u cg c a -- aa cag u-| aca  
agccgggc guaguggcgca gccuuuaauucaguacuugggaggcagaggc gg gau ucug gu uc ggc ccugg cu g  
ucggcccg caucaccgcu cggaaauaaggucgugagcccuccgucuccg cc cua agac ca ag cug ggacc ga a  
uuuucc u a u au a a uu ga aca uu^ gug







chr4:119078623-119078903 (-)

gggcgguggguggcgcacg x1

aaagcagagguagauggacuuc x2

gaguucgaggccagccug x3

aggcuggccucgaacuca x5

ugcgccaccgcgcccggc x1

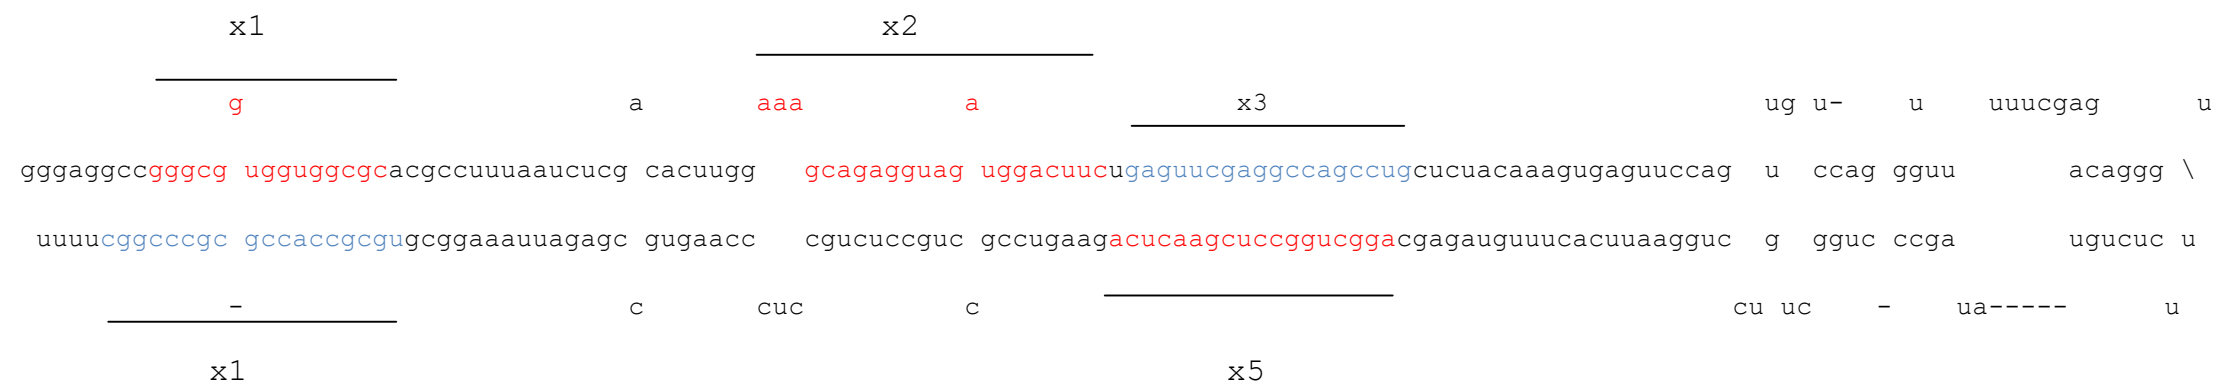

chr7:87297607-87297814 (-)

aagccgggcccguaguggcgca x5 (miR-1965)

agccuuuaauuucaguacuuggga x1

aaaucuaccugccucugccu x1 (miR-1196)

caugcgccacuacugcccggcu x2

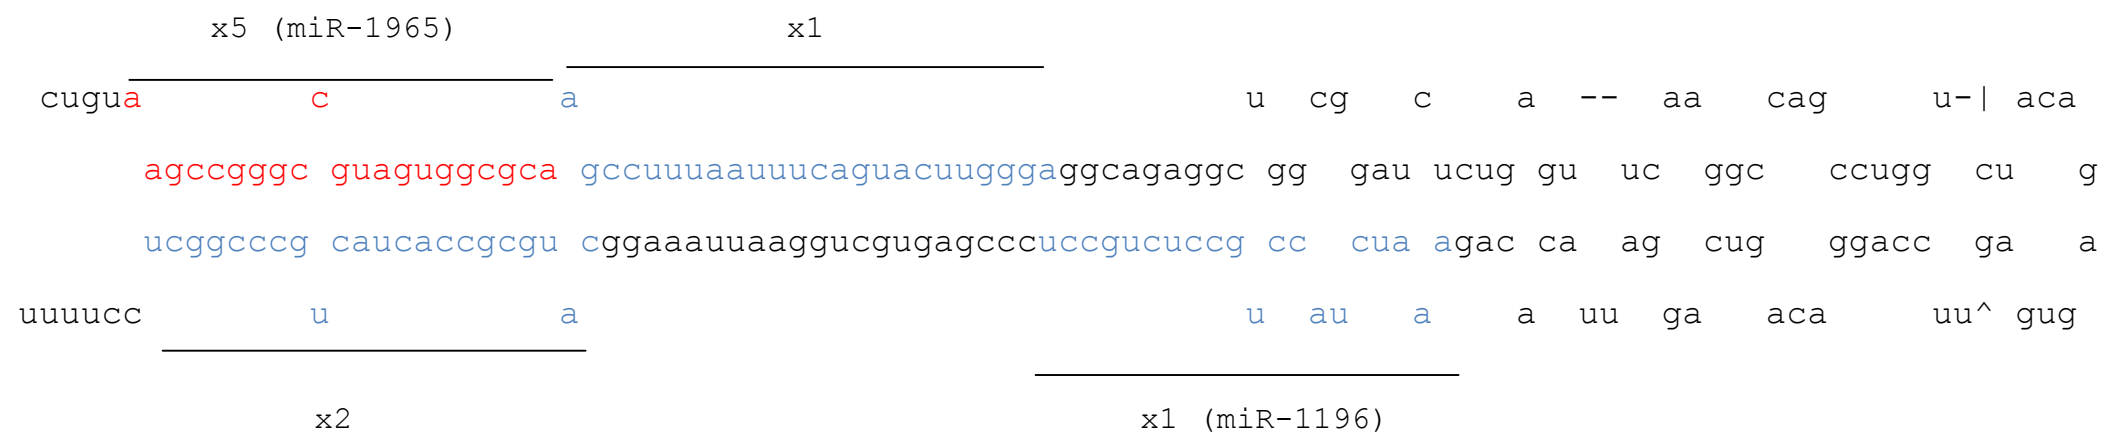









chr4:119078623-119078903 (-)

aaagcagagguagauggacuu x1

x4

---

g a aaa a ug u- u uuucgag u

gggaggccggcg ugguggcgcacgcccuaauncucg cacuugg gcagagguag uggacuucugaguucgaggccagccugcucuacaagugaguuccag u ccag gguu acaggg \

uuuucggcccgc gccaccgcgugcggaaaauagagc gugaacc cgucuccguc gccugaagacucaagcuccgucggacgagauguuucacuaagguc g gguc ccga ugucuc u

- c cuc c cu uc - ua----- u

chr7:87297607-87297814 (-)

aagccgggcccguaguggcgca x40 (miR-1965)

x40 (miR-1965)

---

cugua a c a u cg c a -- aa cag u-| aca

agccgggc guaguggcgca gccuuuaauucaguacuugggagggcagagggc gg gau ucug gu uc ggc ccugg cu g

ucggcccg caucaccgcu cggaaaauaaggucgugagcccuccgucuccg cc cua agac ca ag cug ggacc ga a

uuuucc u a u au a a uu ga aca uu^ gug



chr4:119078623-119078903 (-)

aaagcagagguagauggacuuc x1

x1

---

g a **aaa** a ug u- u uuucgag u

gggaggccggcg ugguggcgcacgcccuaaauucucg cacuugg **gcagagguag** **uggacuuc**ugaguucgaggccagccugcucuacaaagugaguuccag u ccag gguu acaggg \

uuuucggcccgc gccaccgcgugcggaaauuagagc gugaacc cgucuccguc gccugaagacucaagcuccggucggacgagauguuucacuaaagguc g gguc ccga ugucuc u

- c cuc c cu uc - ua----- u

chr7:87297607-87297814 (-)

aagccgggcccguaguggcgca x108 (miR-1965)

agccuuuaauuucaguacuugg x1

cgccacuacugcccggcucc x3

x108 (miR-1965) x1

---

cugua **a** **c** a u cg c a -- aa cag u-| aca

**agccgggc** **guaguggcgca** **gccuuuaauuucaguacuugg**gaggcagaggc gg gau ucug gu uc ggc ccugg cu g

**ucggcccg** **caucaccgc**gu cggaauuaaggucgugagcccuccgucuccg cc cua agac ca ag cug ggacc ga a

uuuucc u a u au a a uu ga aca uu^ gug

---

x3



```

.....uacagagugaguuccaggaca.....1
.....cagagugaguuccaggaca.....4
.....cugccucugccuccgagugc.....1
.....ugccucugccuccgagugc.....1
.....gccucugccuccgagugc.....1

```

chr4:119078623-119078903 (-)

ccuuuaaucucgacacuugg x54  
aaagcagagguagauggacuuc x53  
ugaguucgaggccagccugcu x13  
uacaaagugaguuccaguguuc x6  
gcaggcuggccucgaacucag x1  
aguccgccugccucugccucc x1  
aagugccgagauuaaaggcgu x17  
ugcgccaccgcgcccggcuuu x1

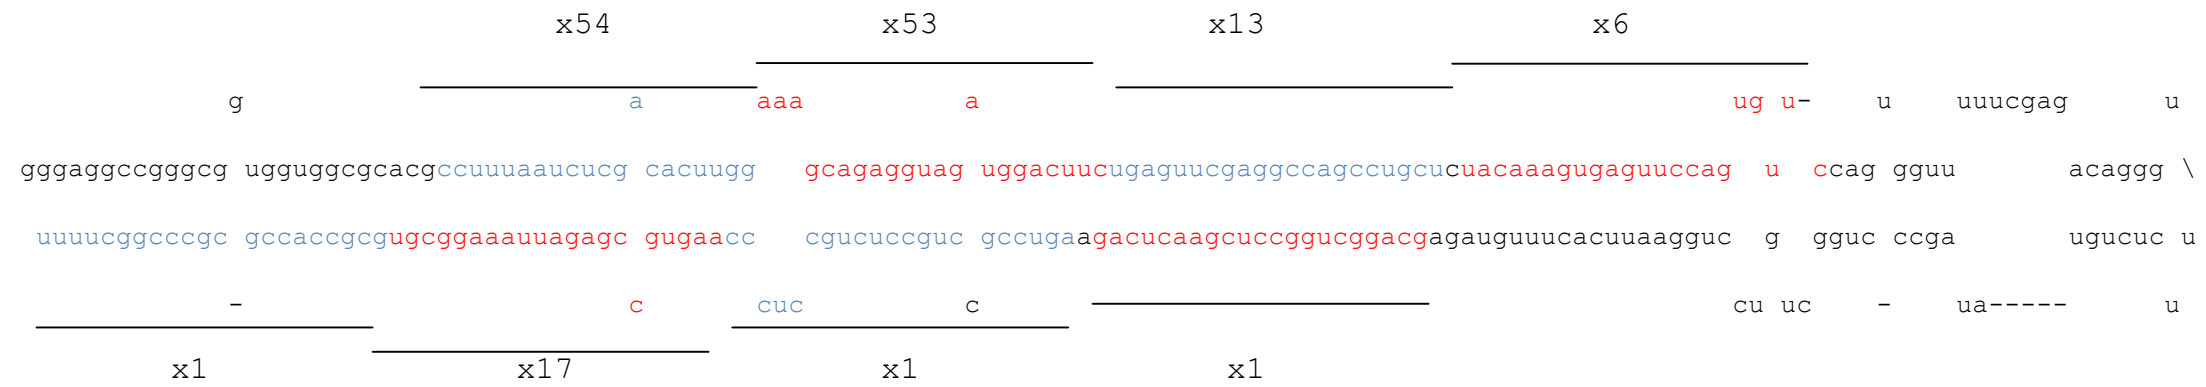







chr4:119078623-119078903 (-)

aggccgggcgugggcgcacg x3

ccuuuaaucucgacacuugga x4

gcaggcuggccucgaacucaga x1

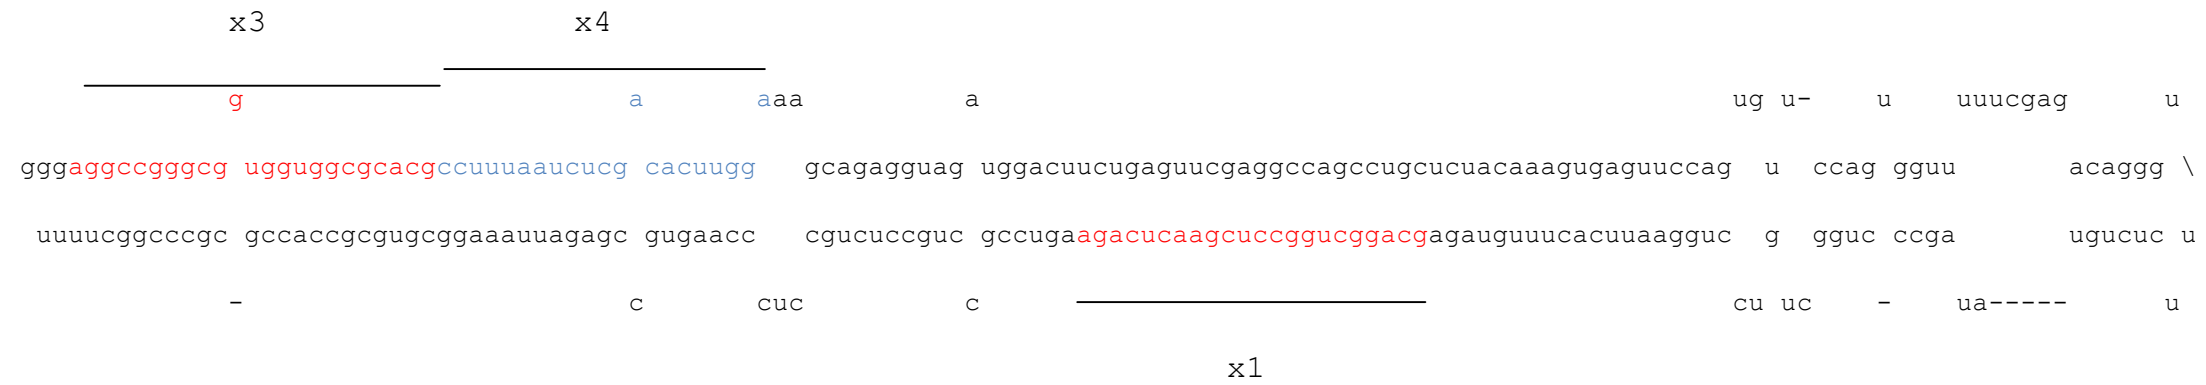

chr7:87297607-87297814 (-)

aagccgggcccguaguggcgca x11 (miR-1965) (x6 Ago2-IP)

agccuuuaauuucaguacuuggga x5 (x4 Ago2-IP)

aaucuaccugccucugccucc x36 (miR-1196) (x11 Ago2-IP)

gugcuggaauuaaaggcau x7 (miR-1186)

cgccacuacugcccggcucc x10

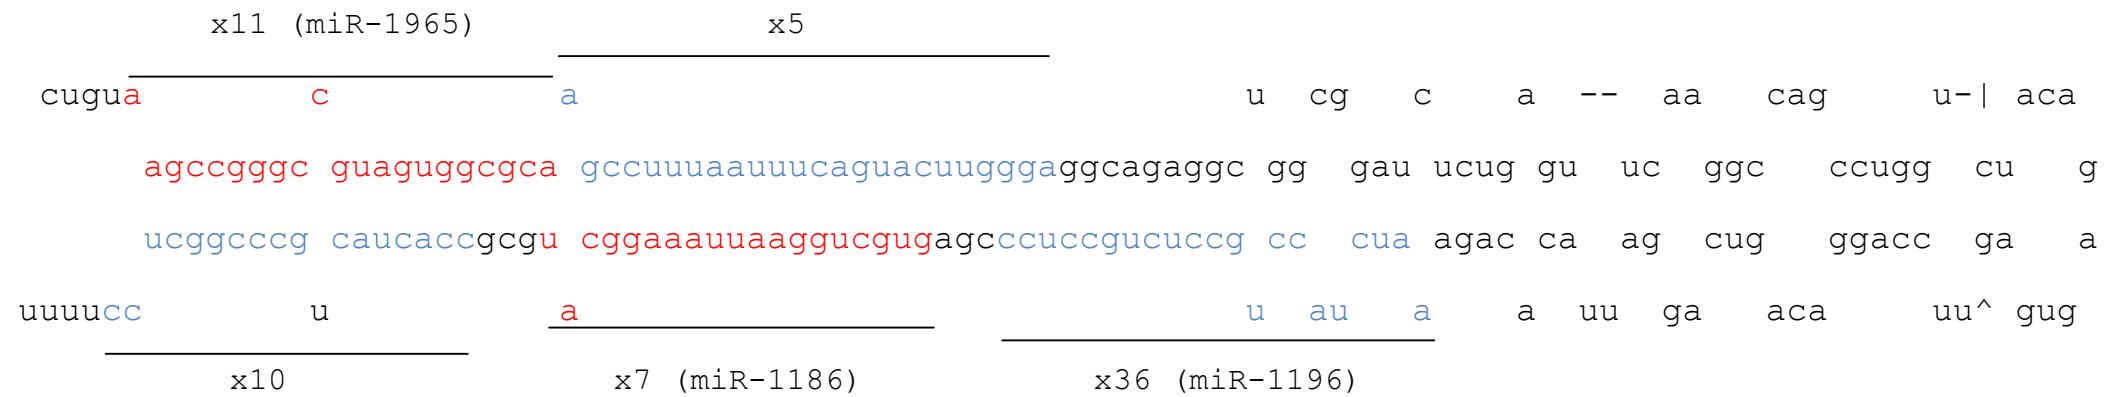



## Supplemental Figure S3





**Mature**

**Star**

caucuccuuaaaggcuuugaugcagugcccuauuuagaaaugguacugaugugagaaauaaaaauugaucaggccuuucgaguaaggcuuaccaccuucuacguuu



miRBase precursor : mmu\_chr7\_32398  
 Total read count : 1608  
 mmu\_chr7\_32398 read count 933  
 mmu\_chr7\_32398\* read count 445  
 remaining reads : 675

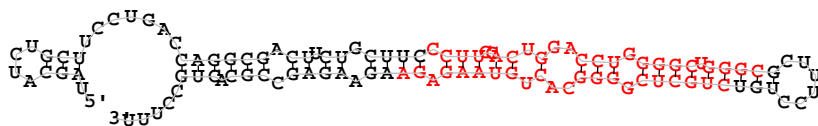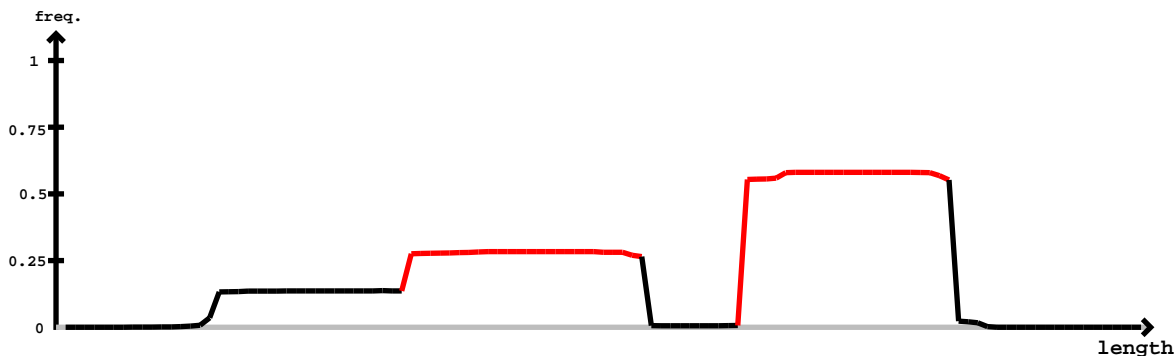

mmu\_chr7\_32398\*

mmu\_chr7\_32398

| 5' -                                                                                                              | reads | mm | sample |
|-------------------------------------------------------------------------------------------------------------------|-------|----|--------|
| uagcaucugcuuccugaccaggcgacuucugcuucccuuccacuggaccuggggcuggggcguuuccugucugcuggggcacuguaagagaagaagagccgcacugccuuu   | exp   |    |        |
| .....((((.....)))).....(((((((.....)))).....)))).....(((((((.....)))).....)))).....(((((((.....)))).....))))..... |       |    |        |
| .....ugaccaggcgacuucugcuuc.....                                                                                   | 1     | 0  | oo1    |
| .....gaAcaggcgacuucugcuuc.....                                                                                    | 1     | 1  | oo1    |
| .....ccuuccacuggaccuggggcuggg.....                                                                                | 5     | 0  | oo1    |
| .....ccuuccacuggaccCggggcuggg.....                                                                                | 1     | 1  | oo1    |
| .....ccuuccacuggaccuggggcuggg.....                                                                                | 1     | 0  | oo1    |
| .....cugcucggggcacuguaagag.....                                                                                   | 2     | 0  | oo1    |
| .....cugcucggggcacuguaagagU.....                                                                                  | 2     | 1  | oo1    |
| .....cugcucggggcCuguaagaga.....                                                                                   | 1     | 1  | oo1    |
| .....cugcucggggcacuguaagaga.....                                                                                  | 16    | 0  | oo1    |
| .....cugcucggggcacuguaagagC.....                                                                                  | 1     | 1  | oo1    |
| .....cugcucggggcacuguaCgaga.....                                                                                  | 1     | 1  | oo1    |
| .....cugcuuccugaccaggcgacuucugcuuc.....                                                                           | 1     | 0  | Tm2    |
| .....cugaccaggcgacuucugcuuc.....                                                                                  | 3     | 0  | Tm2    |
| .....uCaaccaggcgacuucugcuuc.....                                                                                  | 1     | 1  | Tm2    |
| .....ugaccaggAgacuucugcuuc.....                                                                                   | 1     | 1  | Tm2    |
| .....ugaccaggcgacuucugcuuc.....                                                                                   | 31    | 0  | Tm2    |
| .....ugCccaggcgacuucugcuuc.....                                                                                   | 1     | 1  | Tm2    |
| .....gaccaggcgacuucugcuuc.....                                                                                    | 1     | 0  | Tm2    |
| .....gaUcaggcgacuucugcuuc.....                                                                                    | 1     | 1  | Tm2    |
| .....gaccaggcgacuucCgcuuc.....                                                                                    | 1     | 1  | Tm2    |
| .....gaccaggcgacuucugcuuc.....                                                                                    | 130   | 0  | Tm2    |
| .....gaccaggcgacuucCugcuuc.....                                                                                   | 1     | 1  | Tm2    |
| .....accaggcgacuucugcuuc.....                                                                                     | 1     | 0  | Tm2    |
| .....ccaggcgacuucugcuuc.....                                                                                      | 1     | 0  | Tm2    |
| .....caggcgacuucugcuuc.....                                                                                       | 1     | 0  | Tm2    |
| .....cgacuucugcuucccuuccacuggaccuggggcugA.....                                                                    | 1     | 1  | Tm2    |
| .....uuccuuccacuggaccuggggA.....                                                                                  | 1     | 1  | Tm2    |
| .....uuccuuccacuggaccuggggc.....                                                                                  | 1     | 0  | Tm2    |
| .....ccuuccacuggaccuggggcuggg.....                                                                                | 4     | 0  | Tm2    |
| .....ccuuccacuggaccuggggcuggg.....                                                                                | 1     | 0  | Tm2    |
| .....ccuuccacuggaccuggggcugggc.....                                                                               | 123   | 0  | Tm2    |
| .....ccuuccacuggaccuggggcugggc.....                                                                               | 1     | 1  | Tm2    |
| .....ccuuccacuggaccuggggcugggU.....                                                                               | 1     | 1  | Tm2    |

uagcaucugcuuccugaccaggcgacuucugcuucccuuccacuggaccuggggcuggggcgcuuuccugucugcucggggcacuguaagagaagaagagccgcaucgcuuu

|                                               |     |   |     |
|-----------------------------------------------|-----|---|-----|
| .....ccuuccacugUaccuggggcugggc.....           | 1   | 1 | Tm2 |
| .....ccuuccacuggaccuggggcugggAc.....          | 1   | 1 | Tm2 |
| .....ccuuccacuggaccuggggcCgggc.....           | 2   | 1 | Tm2 |
| .....ccuuccacCggaccuggggcugggc.....           | 1   | 1 | Tm2 |
| .....ccuuccacuggaccuggggCcugggc.....          | 1   | 1 | Tm2 |
| .....ccuuccacuggaccuggggcuggCgc.....          | 1   | 1 | Tm2 |
| .....ccuuccCcuggaccuggggcugggc.....           | 1   | 1 | Tm2 |
| .....ccuuccacuggaccuggggAuaggc.....           | 1   | 1 | Tm2 |
| .....ccuuccacuggaccuggggcugggG.....           | 1   | 1 | Tm2 |
| .....ccuuccacuggaccuggggcugggcU.....          | 1   | 1 | Tm2 |
| .....ccuuccacuggaccuggggcugggcguuuccuguc..... | 1   | 0 | Tm2 |
| .....ccuuccacuggaccuggggcugggcguuuccuguU..... | 1   | 1 | Tm2 |
| .....ccuuccacuggaccuggggcugggcguuuccuguA..... | 5   | 1 | Tm2 |
| .....ccacuggaccuggggcugggc.....               | 1   | 0 | Tm2 |
| .....cuggaccuggggcugggc.....                  | 1   | 0 | Tm2 |
| .....cuggaccuggggcugggc.....                  | 1   | 0 | Tm2 |
| .....uggaccuggggcugggc.....                   | 1   | 0 | Tm2 |
| .....gcuuuccugucugcucggggcacuguaagaga.....    | 1   | 0 | Tm2 |
| .....cugcucggggcacuguaa.....                  | 1   | 0 | Tm2 |
| .....cugcucggggcacuguaaga.....                | 6   | 0 | Tm2 |
| .....cugcuAggggcacuguaagag.....               | 1   | 1 | Tm2 |
| .....cugcucggggcacuguaagag.....               | 14  | 0 | Tm2 |
| .....cugcucgUgggcacuguaagaga.....             | 3   | 1 | Tm2 |
| .....cugcucggggcacuguaagaga.....              | 268 | 0 | Tm2 |
| .....cugcucggggcacuguaagUga.....              | 1   | 1 | Tm2 |
| .....cugcucggCgcacuguaagaga.....              | 1   | 1 | Tm2 |
| .....cugcucggggcacugGaagaga.....              | 1   | 1 | Tm2 |
| .....cugcucggggAacuguaagaga.....              | 3   | 1 | Tm2 |
| .....cugcuDggggcacuguaagaga.....              | 1   | 1 | Tm2 |
| .....cugcucggggcacuguaagagU.....              | 4   | 1 | Tm2 |
| .....cugcucgCgggcacuguaagaga.....             | 1   | 1 | Tm2 |
| .....Augcucggggcacuguaagaga.....              | 1   | 1 | Tm2 |
| .....cugcucggUgcacuguaagaga.....              | 1   | 1 | Tm2 |
| .....Uugcucggggcacuguaagaga.....              | 1   | 1 | Tm2 |
| .....cugcCggggcacuguaagaga.....               | 1   | 1 | Tm2 |
| .....cugcucggggcacuguaagagaU.....             | 1   | 1 | Tm2 |
| .....ugcucggggcacuguaaga.....                 | 2   | 0 | Tm2 |
| .....ugcucggggcacuguCagaga.....               | 1   | 1 | Tm2 |
| .....ugcucggggcacuguaagagU.....               | 1   | 1 | Tm2 |
| .....ugcucggggcacuguaagaga.....               | 4   | 0 | Tm2 |
| .....gucggggcacuguaagaga.....                 | 1   | 0 | Tm2 |
| .....cucggggcacuguaagagaaga.....              | 1   | 0 | Tm2 |
| .....ucggggcacuguaagaga.....                  | 1   | 0 | Tm2 |
| .....ucggggcacuguaagagaag.....                | 2   | 0 | Tm2 |
| .....ucggggcacuguaagagaaga.....               | 9   | 0 | Tm2 |
| .....ucggggcacuguaagagaagaa.....              | 1   | 0 | Tm2 |
| .....cgAgggcacuguaagagaa.....                 | 1   | 1 | Tm2 |
| .....ugaccaggcgacuucugcuuc.....               | 4   | 0 | te1 |
| .....cuuccugaccaggcgacuucugcuuc.....          | 1   | 0 | Tm1 |
| .....uccugaccaggcgacuucugcuuc.....            | 2   | 0 | Tm1 |
| .....ccugaccaggcgacuucugcuuc.....             | 2   | 0 | Tm1 |
| .....cugaccaggcgacuucugcuuc.....              | 1   | 0 | Tm1 |
| .....ugaccaggcgacuucugcuuc.....               | 3   | 0 | Tm1 |
| .....gaccaggcgacuucugcuuc.....                | 19  | 0 | Tm1 |
| .....gaccaggcgacuucugUuuc.....                | 1   | 1 | Tm1 |
| .....caggcgacuucugcuuc.....                   | 2   | 0 | Tm1 |
| .....ccuuccacuggaccuggggc.....                | 1   | 0 | Tm1 |
| .....ccuuccacuggaccuggggcugg.....             | 6   | 0 | Tm1 |
| .....ccuuccacuggaccuggggcuggg.....            | 3   | 0 | Tm1 |
| .....ccuuccacuggUccuggggcugggc.....           | 1   | 1 | Tm1 |
| .....ccuuccacugUaccuggggcugggc.....           | 1   | 1 | Tm1 |
| .....ccuuccacuggaccuUgggcugggc.....           | 1   | 1 | Tm1 |
| .....ccuuccacuggaccuggggcugggc.....           | 234 | 0 | Tm1 |
| .....ccuuccacuggaccuggggcCgggc.....           | 1   | 1 | Tm1 |
| .....ccuuccacCggaccuggggcugggc.....           | 1   | 1 | Tm1 |
| .....ccuuccaUggaccuggggcugggc.....            | 1   | 1 | Tm1 |
| .....cUuuccacuggaccuggggcugggc.....           | 1   | 1 | Tm1 |

uagcaucugcuuccugaccaggcgacuucugcuucccuuccacuggaccuggggcggcgcuuuccugucugcucggggcacuguaagagaagaagagccgcaucgcuuu

|                                               |     |   |     |
|-----------------------------------------------|-----|---|-----|
| .....ccuuccacuggaccugggUcugggc.....           | 1   | 1 | Tm1 |
| .....ccuucUacuggaccuggggcugggc.....           | 1   | 1 | Tm1 |
| .....ccuuccacuggaccuggggcugggA.....           | 1   | 1 | Tm1 |
| .....ccuuccacuggaccugggCcugggc.....           | 1   | 1 | Tm1 |
| .....ccuuccacuggaccuggUcugggc.....            | 2   | 1 | Tm1 |
| .....ccuuccacuggaccuggggcugggU.....           | 1   | 1 | Tm1 |
| .....ccuuccacuggaccuggggcuUggc.....           | 1   | 1 | Tm1 |
| .....ccuuccacuggacUuggggcugggc.....           | 2   | 1 | Tm1 |
| .....ccuAccacuggaccuggggcugggc.....           | 1   | 1 | Tm1 |
| .....ccuuccacuggaUcuggggcugggc.....           | 2   | 1 | Tm1 |
| .....cuuccacuggaccuggggcugggc.....            | 1   | 0 | Tm1 |
| .....cCuccacuggaccuggggcugggc.....            | 1   | 1 | Tm1 |
| .....uuccacuggaccuggggc.....                  | 1   | 0 | Tm1 |
| .....Cccacuggaccuggggcugggc.....              | 1   | 1 | Tm1 |
| .....cacuggaccuggggcugggc.....                | 2   | 0 | Tm1 |
| .....acuggaccuggggcuggg.....                  | 1   | 0 | Tm1 |
| .....cuggaccuggggcuggg.....                   | 1   | 0 | Tm1 |
| .....uggaccuggggcugggc.....                   | 1   | 0 | Tm1 |
| .....gucugcucggggcacuguaaga.....              | 1   | 0 | Tm1 |
| .....ucugcucggggcacuguaagaga.....             | 1   | 0 | Tm1 |
| .....cugcucggggcacuguaag.....                 | 1   | 0 | Tm1 |
| .....cugcucggggcacuguaaga.....                | 9   | 0 | Tm1 |
| .....cugcucggggcacuguaagaU.....               | 1   | 1 | Tm1 |
| .....cugcucggggcacuguaagag.....               | 7   | 0 | Tm1 |
| .....cugcucggggGacuguaagaga.....              | 1   | 1 | Tm1 |
| .....cugcucgggUgcacuguaagaga.....             | 2   | 1 | Tm1 |
| .....cugcucggggcacuguaagagC.....              | 1   | 1 | Tm1 |
| .....cugcuAggggcacuguaagaga.....              | 1   | 1 | Tm1 |
| .....cGgcucggggcacuguaagaga.....              | 1   | 1 | Tm1 |
| .....cugcucggggcacuguGagaga.....              | 1   | 1 | Tm1 |
| .....cugUcggggcacuguaagaga.....               | 2   | 1 | Tm1 |
| .....cugcucUggggcacuguaagaga.....             | 2   | 1 | Tm1 |
| .....cuCucggggcacuguaagaga.....               | 1   | 1 | Tm1 |
| .....cugcucCgggcacuguaagaga.....              | 1   | 1 | Tm1 |
| .....cugcuUggggcacuguaagaga.....              | 1   | 1 | Tm1 |
| .....cugcucggggcGcuguaagaga.....              | 1   | 1 | Tm1 |
| .....cugcucggggcacugAagaga.....               | 1   | 1 | Tm1 |
| .....cugcucggggcaUuguaagaga.....              | 4   | 1 | Tm1 |
| .....Uugcucggggcacuguaagaga.....              | 1   | 1 | Tm1 |
| .....cugcucggggcacuguaaUaga.....              | 1   | 1 | Tm1 |
| .....cugcucggggcacuguaagaga.....              | 448 | 0 | Tm1 |
| .....cugcucggggcacuguaagagU.....              | 5   | 1 | Tm1 |
| .....cugcucgggCcacuguaagaga.....              | 1   | 1 | Tm1 |
| .....cugcucggggcacuguaagUga.....              | 1   | 1 | Tm1 |
| .....cugcucggggcacuguaagagaU.....             | 2   | 1 | Tm1 |
| .....ugcucggggcacuguaagaga.....               | 1   | 0 | Tm1 |
| .....ugcucggggcacuguaagagU.....               | 1   | 1 | Tm1 |
| .....cuGggggcacuguaagaga.....                 | 1   | 1 | Tm1 |
| .....cucggggcacuguaagaga.....                 | 2   | 0 | Tm1 |
| .....cucggggcacuguaagagaaga.....              | 1   | 0 | Tm1 |
| .....ucggggcacuguaagaga.....                  | 1   | 0 | Tm1 |
| .....ucggggcacuguaagagaag.....                | 3   | 0 | Tm1 |
| .....ucggggcacuguaagagaaga.....               | 11  | 0 | Tm1 |
| .....ucggggcacuguaagagaagaa.....              | 2   | 0 | Tm1 |
| .....cggggcacuguaagaga.....                   | 1   | 0 | Tm1 |
| .....ccuuccacuggaccuggggcugggc.....           | 1   | 0 | SSC |
| .....ccuuccacuggaccuggggcugggcguuuccuguc..... | 1   | 0 | SSC |
| .....cugcucggggcacuguaagagG.....              | 1   | 1 | SSC |
| .....cugcucggggcacuguaagaga.....              | 1   | 0 | SSC |
| .....ugaccaggcgacuucugcuuc.....               | 1   | 0 | Tp2 |
| .....ccuuccacuggaccuggggcuggg.....            | 1   | 0 | Tp2 |
| .....ccuuccacuggaccuggggcugggc.....           | 14  | 0 | Tp2 |
| .....ccuuccacuggaccuggggcuggUc.....           | 1   | 1 | Tp2 |
| .....cugcucggggcacuguaagag.....               | 1   | 0 | Tp2 |
| .....cugcucggggcacuguaagaga.....              | 30  | 0 | Tp2 |
| .....cugcuAggggcacuguaagaga.....              | 1   | 1 | Tp2 |
| .....cugcucggggcCcuguaagaga.....              | 1   | 1 | Tp2 |

uagcaucugcuuccugaccaggcgacuucugcuucccuuccacuggaccuggggcuggggcgcuuuccugucugcucggggcacuguaagagaagaagagccgcacugccuuu

|                                     |    |   |     |
|-------------------------------------|----|---|-----|
| .....ccugaccaggcgacuucugcuuc.....   | 1  | 0 | te2 |
| .....cugaccaggcgacuucugcu.....      | 1  | 0 | te2 |
| .....ugaccaggcgacuucugcuuc.....     | 1  | 0 | te2 |
| .....gaccaggcgacuucugcuuc.....      | 1  | 0 | te2 |
| .....ugaccaggcgacuucugcuuc.....     | 1  | 0 | tp1 |
| .....ccuuccacuggaccuggggcugggc..... | 3  | 0 | tp1 |
| .....cugcucggggcacuguaagaga.....    | 15 | 0 | tp1 |
| .....ucggggcacuguaagagaag.....      | 1  | 0 | tp1 |
| .....ucggggcacuguaagagaaga.....     | 1  | 0 | tp1 |
| .....ucggggcacuguaagagaagaa.....    | 1  | 0 | tp1 |



mmu\_chr10\_1158

aaaaaaaaaacaucugucuuagcuggggcaugaucugaugagcucacagccaggcucugggcuuagccuagcuuucuguuacaaaaauauuuccuaaaauagguuuugcuuu

|                                                |    |   |     |
|------------------------------------------------|----|---|-----|
| .....ucuuagcuggggcaugaucugau.....              | 1  | 0 | CFU |
| .....ucuuagcuggggcaugaucugaugagc.....          | 3  | 0 | CFU |
| .....uuagcuggggcaugaucugaugCg.....             | 1  | 1 | CFU |
| .....uuagcuggggcaugaucugaugagA.....            | 2  | 1 | CFU |
| .....uuagcuggggcaugaucugCugagc.....            | 1  | 1 | CFU |
| .....uuCgcuggggcaugaucugaugagc.....            | 3  | 1 | CFU |
| .....uuagcuggggcaugaucugaugagc.....            | 19 | 0 | CFU |
| .....uuagcuggggcauUaucugaugagc.....            | 1  | 1 | CFU |
| .....uuagcuggggcaugaucugaugagc.....            | 2  | 0 | CFU |
| .....uagcuggggcCugaucugauga.....               | 1  | 1 | CFU |
| .....uagcuggggcaugaucugaugag.....              | 2  | 0 | CFU |
| .....uagcuggggcaugaucugauUagc.....             | 1  | 1 | CFU |
| .....uagcuggggcaugaucugaugCgc.....             | 1  | 1 | CFU |
| .....uaUcuggggcaugaucugaugagc.....             | 1  | 1 | CFU |
| .....uagcuggggcaugCucugaugagc.....             | 2  | 1 | CFU |
| .....uagcuggggcaugaucugCugagc.....             | 4  | 1 | CFU |
| .....uCgcuggggcaugaucugaugagc.....             | 3  | 1 | CFU |
| .....uagcCggggcaugaucugaugagc.....             | 1  | 1 | CFU |
| .....uagcuggggcaugaucugaugagc.....             | 40 | 0 | CFU |
| .....uagcuggggcaugaucugaugGgc.....             | 1  | 1 | CFU |
| .....uagcuggggcaugaucugauCagc.....             | 1  | 1 | CFU |
| .....uagcuggggcaugaucugaugCgcu.....            | 1  | 1 | CFU |
| .....uCgcuggggcaugaucugaugagc.....             | 1  | 1 | CFU |
| .....uagcuggggcaugaucugaugagc.....             | 12 | 0 | CFU |
| .....uagcuggggcaugaucugaugaAcu.....            | 1  | 1 | CFU |
| .....uagcuggggcaugaucugauCagcu.....            | 1  | 1 | CFU |
| .....uagcuggggcaugUucugaugagc.....             | 1  | 1 | CFU |
| .....uagcuggggcaugaucugaugagcucacagccaggc..... | 2  | 0 | CFU |
| .....gcuuggggcaugaucugaugagc.....              | 1  | 1 | CFU |
| .....gggcaugaucugaugagc.....                   | 1  | 0 | CFU |
| .....ggcgaugaucugaugagcucacagccaggcucuggU..... | 1  | 1 | CFU |
| .....ucuuagcuggggcaugauc.....                  | 1  | 0 | 48t |
| .....ucuuagcuggggcaugaucu.....                 | 2  | 0 | 48t |
| .....uuagcuggggcaugaucugauga.....              | 1  | 0 | 48t |
| .....uuagcuggggcaugaucugaugag.....             | 5  | 0 | 48t |
| .....uuagcuggggcaugaucugaugagc.....            | 4  | 0 | 48t |
| .....uagcuggggcaugaucugauga.....               | 1  | 0 | 48t |
| .....uagcuggggcaugaucugaugagc.....             | 8  | 0 | 48t |
| .....uagcuggggcaugaucugaugagc.....             | 1  | 0 | 48t |
| .....Gcacagccaggcucugg.....                    | 1  | 1 | mED |
| .....auauuuccuaaaauagguuu.....                 | 1  | 0 | mED |
| .....cuuagcuggggcaugaucugaugagc.....           | 1  | 0 | SSC |
| .....uuagcuggggcaugaucugauga.....              | 1  | 0 | SSC |
| .....uuagcuggggcaugaucugaugag.....             | 2  | 0 | SSC |
| .....uuagcuggggcaugaucugaugagA.....            | 1  | 1 | SSC |
| .....uuagcuggggcaugaucugaugagc.....            | 12 | 0 | SSC |
| .....uuagcuggggcaugaucugaugagc.....            | 1  | 0 | SSC |
| .....uagcuggggcaugaucugauga.....               | 3  | 0 | SSC |
| .....uagcuggggcaugaucugaugagc.....             | 7  | 0 | SSC |
| .....ugggcaugaucugauga.....                    | 1  | 0 | SSC |
| .....ugaucugaugagcucacagccaggcuc.....          | 1  | 0 | SSC |
| .....aucugaugagcucacagcc.....                  | 1  | 0 | SSC |
| .....uuagcuggggcaugaucugaugag.....             | 1  | 0 | t11 |
| .....uuagcuggggcaugaucugaugagc.....            | 9  | 0 | t11 |
| .....uuagcuggggcaugaucugaugagA.....            | 1  | 1 | t11 |
| .....uuagcuggggcaugaucugaugagcA.....           | 1  | 1 | t11 |
| .....uagcuggggcaugaucuga.....                  | 1  | 0 | t11 |
| .....uagcuggggcaugaucugauga.....               | 1  | 0 | t11 |
| .....uagcuggggcaugaucugaugaA.....              | 1  | 1 | t11 |
| .....uagcuggggcaugaucugaugCgc.....             | 1  | 1 | t11 |
| .....uagcuggggcaugaucugaugagc.....             | 14 | 0 | t11 |
| .....uCgcuggggcaugaucugaugagc.....             | 1  | 1 | t11 |
| .....uagcugCgcgaugaucugaugagc.....             | 1  | 1 | t11 |
| .....uagcuggggcaugaucugCugagc.....             | 1  | 1 | t11 |

## mmu\_chr10\_1158

aaaaaaaaaacaucugucuuagcuggggcaugaucugaugagcucacagccaggcucucugggcuaugccuagcuuucuguuacaaaaauauuuccuaaaauagguuuugcuuu

|                                       |    |   |     |
|---------------------------------------|----|---|-----|
| .....uagcuggggcaugaucugaugagcuU.....  | 1  | 1 | t11 |
| .....agcuggggcaugaucugaugagc.....     | 1  | 0 | t11 |
| .....ucuuagcuggggcaugaucugauga.....   | 1  | 0 | gcb |
| .....uuagcuggggcaugaucugauga.....     | 2  | 0 | gcb |
| .....uuagcuggggcaugaucugaugag.....    | 1  | 0 | gcb |
| .....uuagcuggggcaugaucugaugagc.....   | 4  | 0 | gcb |
| .....uagcuggggcaugaucugaugagcu.....   | 1  | 0 | gcb |
| .....agcuggggcaugaucugaugagcu.....    | 1  | 0 | gcb |
| .....aucugaugagcucacagcc.....         | 1  | 0 | gcb |
| .....ucuuagcuggggcaugaucugaugagc..... | 1  | 0 | kdn |
| .....uagcuggggcaugaucugaugagc.....    | 1  | 0 | kdn |
| .....ucuuagcuggggcaugaucuu.....       | 1  | 0 | gc2 |
| .....uagcuggggcaugaucugaugag.....     | 2  | 0 | gc2 |
| .....uagcuggggcaugaucugaugagc.....    | 1  | 0 | gc2 |
| .....uagcuggggcaugaucugaugagcu.....   | 3  | 0 | gc2 |
| .....ucuuagcuggggcaugaucugaug.....    | 2  | 0 | hlc |
| .....ucuuagcuggggcaugaucuuUauga.....  | 1  | 1 | hlc |
| .....uuagcuggggcaugaucugaugag.....    | 2  | 0 | hlc |
| .....uuagcuggggcaugaucugCugagc.....   | 1  | 1 | hlc |
| .....uuagcuggggcaugaucugaugagc.....   | 6  | 0 | hlc |
| .....uagcuggggcaugaucugauga.....      | 1  | 0 | hlc |
| .....uagcuggggcaugaucugaugagc.....    | 10 | 0 | hlc |
| .....uagcuggggcaugaucuuAaugagc.....   | 1  | 1 | hlc |
| .....uagcuggggcaugaucugaugagcA.....   | 1  | 1 | hlc |
| .....uagcuggggcaugaucugaugagcu.....   | 3  | 0 | hlc |
| .....ucuuagcuggggcaugaucugaug.....    | 2  | 0 | sp2 |
| .....ucuuagcuggggcaugaucugauga.....   | 4  | 0 | sp2 |
| .....ucuuagcuggggcaugaucugaugag.....  | 1  | 0 | sp2 |
| .....cuuagcuggggcaugaucugaugagc.....  | 1  | 0 | sp2 |
| .....uuagcuggggcaugaucugaugagc.....   | 2  | 0 | sp2 |
| .....uagcuggggcaugaucugaugagc.....    | 5  | 0 | sp2 |
| .....ucuuagcuggggcaugaucugau.....     | 1  | 0 | h11 |
| .....ucuuagcuggggcaugaucugaug.....    | 1  | 0 | h11 |
| .....uuagcuggggcaugaucugaugag.....    | 1  | 0 | h11 |
| .....uuagcuggggcaugaucugaugagc.....   | 2  | 0 | h11 |
| .....uagcuggggcaugaucugaugagc.....    | 3  | 0 | h11 |
| .....ucuuagcuggggcaugaucugaugag.....  | 1  | 0 | mus |
| .....uuagcuggggcaugaucugauga.....     | 3  | 0 | mus |
| .....uuagcuggggcaugaucugaugagc.....   | 1  | 0 | mus |
| .....uagcuggggcaugaucugaugag.....     | 2  | 0 | mus |
| .....uagcuggggcaugaucugaugagc.....    | 2  | 0 | mus |
| .....Uuuagcuggggcaugaucugaug.....     | 1  | 1 | Am2 |
| .....uuagcuggggcaugaucugaugC.....     | 1  | 1 | Am2 |
| .....uuagcuggggcaugaucugauga.....     | 3  | 0 | Am2 |
| .....uuagcuggggcaugaCcugauga.....     | 1  | 1 | Am2 |
| .....uuagcuggggcaugaucugaugagc.....   | 3  | 0 | Am2 |
| .....uagcuggggcaugaucugau.....        | 1  | 0 | Am2 |
| .....cuuagcuggggcaugaucugaugagc.....  | 1  | 0 | mm1 |
| .....uuagcuggggcaugaucugaugag.....    | 1  | 0 | mm1 |
| .....uagcuggggcaugaucugaugagc.....    | 1  | 0 | mm1 |
| .....ucuuagcuggggcaugaucuu.....       | 2  | 0 | nt2 |
| .....ucuuagcuggggcaugaucugauga.....   | 1  | 0 | nt2 |
| .....uuagcuggggcaugaucugaugag.....    | 1  | 0 | nt2 |
| .....uuagcuggggcaugaucugaugagc.....   | 2  | 0 | nt2 |
| .....uagcuggggcaugaucugaugag.....     | 1  | 0 | nt2 |
| .....uagcuggggcaugaucugaugagc.....    | 2  | 0 | nt2 |
| .....ucuuagcuggggcaugaucuu.....       | 1  | 0 | skn |
| .....ucuuagcuggggcaugaucugau.....     | 1  | 0 | skn |

## mmu\_chr10\_1158

aaaaaaaaaacaucugucuuagcuggggcaugaucugaugagcucacagccaggcucucugggcuaugccuagcuuucuguuacaaaaauauauuccuaaaauagguuuugcuuu

|                                      |    |   |     |
|--------------------------------------|----|---|-----|
| .....uuagcuggggcaugaucugaugag.....   | 1  | 0 | skn |
| .....uuagcuggggcaugaucugaugagc.....  | 4  | 0 | skn |
| .....uagcuggggcaugaucugaugag.....    | 1  | 0 | skn |
| .....uagcuggggcaugaucugaugagc.....   | 3  | 0 | skn |
| .....uuagcuggggcaugaucugauga.....    | 1  | 0 | itr |
| .....uuagcuggggcaugaucugaugag.....   | 1  | 0 | itr |
| .....uagcuggggcaugaucugaugag.....    | 1  | 0 | itr |
| .....uagcuggggcaugaucugaugagc.....   | 2  | 0 | itr |
| .....ucuuagcuggggcaugaucugau.....    | 1  | 0 | em2 |
| .....uuagcuggggcaugaucugaugagc.....  | 1  | 0 | em2 |
| .....uagcuggggcaugaucugaugagc.....   | 2  | 0 | em2 |
| .....ucuuagcuggggcaugaucugau.....    | 1  | 0 | mE8 |
| .....ucuuagcuggggcaugaucugauga.....  | 2  | 0 | mE8 |
| .....uuagcuggggcaugaucugaugagc.....  | 6  | 0 | mE8 |
| .....uuagcuggggcaugaucugaugUgc.....  | 1  | 1 | mE8 |
| .....uuagcuggggcaugaucuCaugagc.....  | 1  | 1 | mE8 |
| .....uuagcuggggcaugaucugaugagcG..... | 1  | 1 | mE8 |
| .....uagcuggggcaugaucugaugagc.....   | 8  | 0 | mE8 |
| .....uagcuggggcaugaucugaugagcU.....  | 3  | 0 | mE8 |
| .....ucuggcuuauugccuagc.....         | 1  | 0 | mE8 |
| .....ucuuagcuggggcaugaucuc.....      | 1  | 0 | bm2 |
| .....ucuuagcuggggcaugaucugau.....    | 1  | 0 | bm2 |
| .....ucuuagcuggggcaugaucugaug.....   | 1  | 0 | bm2 |
| .....uuagcuggggcaugaucugaugagc.....  | 4  | 0 | bm2 |
| .....uagcuggggcaugaucugaugag.....    | 1  | 0 | bm2 |
| .....uagcuggggcaugaucugaugagc.....   | 3  | 0 | bm2 |
| .....ucuuagcuggggcaugaucugauga.....  | 1  | 0 | h12 |
| .....ucuuagcuggggcaugaucugaugag..... | 1  | 0 | h12 |
| .....uuagcuggggcaugaucugaugagc.....  | 2  | 0 | h12 |
| .....uuagcuggggcaugaucugaugagcU..... | 1  | 0 | h12 |
| .....uagcuggggcaugaucugaugagc.....   | 5  | 0 | h12 |
| .....uagcuggggcaugaucugaugagcU.....  | 2  | 0 | h12 |
| .....uagcuggggcaugaucugaugagcA.....  | 3  | 1 | h12 |
| .....ucuuagcuggggcaugaucugaugag..... | 1  | 0 | c8t |
| .....uagcuggggcaugaucugaugagc.....   | 1  | 0 | c8t |
| .....uagcuggggcaugaucugaugagcU.....  | 1  | 0 | c8t |
| .....ugaucugaugagcucacagccaggcU..... | 1  | 0 | c8t |
| .....uagcuggggcaugaucugaugagcU.....  | 1  | 0 | li3 |
| .....uuagcuggggcaugaCcugaugagc.....  | 1  | 1 | ay1 |
| .....uagcuggggcaugaucugaugagcU.....  | 1  | 0 | ay1 |
| .....uuagcuggggcaugaucugaugagc.....  | 19 | 0 | hi2 |
| .....uagcuggggcaugaucugaugagc.....   | 11 | 0 | hi2 |
| .....uagcuggggcaugaucugaugagcU.....  | 2  | 0 | hi2 |
| .....agcuggggcaugaucugaugagc.....    | 1  | 0 | hi2 |
| .....uuagcuggggcaugaucugauga.....    | 2  | 0 | Tm2 |
| .....uuagcuggggcaugaucugaugagc.....  | 8  | 0 | Tm2 |
| .....uagcuggggcaugaucugaugagc.....   | 6  | 0 | Tm2 |
| .....uagcuggggcaugaucugauCagcU.....  | 1  | 1 | Tm2 |
| .....uagcuggggcaugaucugaugagcU.....  | 1  | 0 | Tm2 |
| .....ucugaugagcucacagccaggcucug..... | 1  | 0 | Tm2 |
| .....uagcuggggcaugaucugaugagc.....   | 1  | 0 | ntr |
| .....uuagcuggggcaugaucugaugagc.....  | 2  | 0 | nm2 |
| .....uagcuggggcaugaucugaugag.....    | 1  | 0 | nm2 |
| .....uagcuggggcaugaucugaugagc.....   | 3  | 0 | nm2 |
| .....ucuuagcuggggcaugaucugaugU.....  | 1  | 1 | hr3 |
| .....cuuagcuggggcaugaucugaugagU..... | 1  | 1 | hr3 |



mmu\_chr10\_1158

aaaaaaaaaacaucugucuuagcuggggcaugaucugaugagcucacagccaggcucucuggcuuagccuagcuuucuguuacaaaaauauuuccuaaaauagguuuugcuuu

|                                               |    |   |     |
|-----------------------------------------------|----|---|-----|
| .....uuagcuggggcaugaucugaugaU.....            | 2  | 1 | hr3 |
| .....uuagcuggggcaugaucugaugagU.....           | 1  | 1 | hr3 |
| .....uuagcuggggcaugaucugaugagcu.....          | 2  | 0 | hr3 |
| .....uuagcuggggcaugaucugaugagAu.....          | 1  | 1 | hr3 |
| .....uuagcuggggcaugaucugaugagUu.....          | 1  | 1 | hr3 |
| .....uuagcuggggcaugaucugaugagcuU.....         | 1  | 1 | hr3 |
| .....uagcuggggcaugaucugaugagU.....            | 1  | 1 | hr3 |
| .....uagcuggggcaugaucugaugagcu.....           | 2  | 0 | hr3 |
| .....ucuuagcuggggcaugaucugau.....             | 5  | 0 | c4t |
| .....ucuuagcuggggcaugaucug.....               | 1  | 0 | c4t |
| .....ucuuagcuggggcaugaucugau.....             | 1  | 0 | c4t |
| .....uuagcuggggcaugaucugauga.....             | 1  | 0 | c4t |
| .....uuagcuggggcaugaucugaugag.....            | 2  | 0 | c4t |
| .....uuagcuggggcaugaucugaugagc.....           | 2  | 0 | c4t |
| .....uagcuggggcaugaucugaugag.....             | 2  | 0 | c4t |
| .....uagcuggggcaugaucugaugagc.....            | 9  | 0 | c4t |
| .....uagcuggggcaugaucugaugagcu.....           | 5  | 0 | c4t |
| .....ucuuagcuggggcaugaucugauga.....           | 1  | 0 | ay2 |
| .....ucuuagcuggggcaugaucugaugagc.....         | 1  | 0 | ay2 |
| .....uuagcuggggcaugaucuga.....                | 1  | 0 | ay2 |
| .....uuagcuggggcaugaucugaugaU.....            | 1  | 1 | ay2 |
| .....uuagcuggggcaugaucugaugag.....            | 1  | 0 | ay2 |
| .....uuagcuggggcaugaucugaugagc.....           | 5  | 0 | ay2 |
| .....uuagcuggggcaugaucugaugagA.....           | 1  | 1 | ay2 |
| .....uagcuggggcaugaucugaugag.....             | 1  | 0 | ay2 |
| .....uagcuggggcaugaucugaugagc.....            | 2  | 0 | ay2 |
| .....uagcuggggcaugaucugaugagcu.....           | 2  | 0 | ay2 |
| .....uuagcuggggcaugaucugaugagUu.....          | 1  | 1 | hr2 |
| .....uuagcuggggcaugaucugaugagcu.....          | 1  | 0 | hr2 |
| .....uagcuggggcaugaucugaugagU.....            | 1  | 1 | hr2 |
| .....uagcuggggcaugaucugaugagcu.....           | 1  | 1 | hr2 |
| .....uagcuggggcaugaucugaugagcuU.....          | 1  | 1 | hr2 |
| .....cuuagcuggggcaugaucugaugag.....           | 1  | 0 | pob |
| .....cuuagcuggggcaugaucugaugagcu.....         | 1  | 0 | pob |
| .....uuagcuggggcaugaucugaugag.....            | 1  | 0 | pob |
| .....uuagcuggggcaugaucugaugagc.....           | 1  | 0 | pob |
| .....uuagcuggggcaugaucugaugagcuc.....         | 5  | 0 | pob |
| .....uagcuggggcaugaucugaugagc.....            | 3  | 0 | pob |
| .....uagcuggggcaugaucugaugagcu.....           | 1  | 0 | pob |
| .....ucuuagcuggggcaugaucugaugagc.....         | 1  | 0 | Tp2 |
| .....ucuuagcuggggcaugCucugaugagc.....         | 1  | 1 | Tp2 |
| .....uuagcuggggcaugaucugauga.....             | 1  | 0 | Tp2 |
| .....uuagcuggggcaugaucugaugag.....            | 1  | 0 | Tp2 |
| .....uuagcuggggcaugaucugaugagc.....           | 10 | 0 | Tp2 |
| .....uuagcuggggcCugaucugaugagc.....           | 1  | 1 | Tp2 |
| .....uuagcuggggcaugaucugaugagcu.....          | 1  | 0 | Tp2 |
| .....uagcuggggcaugaucugaugagc.....            | 5  | 0 | Tp2 |
| .....uagcuggggcaugaucugaugagcu.....           | 4  | 0 | Tp2 |
| .....agcuggggcaugaucugaugagcu.....            | 1  | 0 | Tp2 |
| .....augaucugaugagcucacagccaggcu.....         | 1  | 0 | Tp2 |
| .....augaucugaugagcucacagccaggcucuggcuau..... | 1  | 0 | Tp2 |
| .....ugaucugaugagcucacagccaggcuc.....         | 1  | 0 | Tp2 |
| .....cuguuacaaaaauauuuccuaaaauagguuu.....     | 1  | 0 | Tp2 |
| .....uuagcuggggcaugaucugaugag.....            | 1  | 0 | te2 |
| .....ucuuagcuggggcaugaucugau.....             | 2  | 0 | peb |
| .....ucuuagcuggggcaugaucugaug.....            | 1  | 0 | peb |
| .....ucuuagcuggggcaugaucugauga.....           | 1  | 0 | peb |
| .....uuagcuggggcaugaucugaugag.....            | 1  | 0 | peb |
| .....ugucuuagcuggggcaugaucugaugagc.....       | 1  | 0 | Tp1 |
| .....uuagcuggggcaugaucugauga.....             | 1  | 0 | Tp1 |
| .....uuagcuggggcaugaucugaugagc.....           | 9  | 0 | Tp1 |

## mmu\_chr10\_1158

aaaaaaaaaacaucugucuuagcuggggcaugaucugaugagcucacagccaggcucucugggcuuagccuagcuuucuguuacaaaaauauuuccuaaaauaggguuuugcuuu

|                                       |   |   |     |
|---------------------------------------|---|---|-----|
| .....uagcuggggcaugaucugauga.....      | 1 | 0 | Tp1 |
| .....uagcuggggcaugaucugaugagc.....    | 4 | 0 | Tp1 |
| .....uagcuggggcaugaucugaugagcu.....   | 4 | 0 | Tp1 |
| .....ucugggcuuagccuagcuuucu.....      | 1 | 0 | Tp1 |
| .....ucuuagcuggggcaugauc.....         | 2 | 0 | bac |
| .....ucuuagcuggggcaugaucu.....        | 3 | 0 | bac |
| .....uuagcuggggcaugaucugaugag.....    | 1 | 0 | bac |
| .....uagcuggggcaugaucugaugag.....     | 1 | 0 | bac |
| .....uagcuggggcaugaucugaugagc.....    | 2 | 0 | bac |
| .....uagcuggggcaugaucugaugagcu.....   | 1 | 0 | bac |
| .....ucuuagcuggggcaugaucugaugag.....  | 1 | 0 | mE1 |
| .....uuagcuggggcaugaucugauga.....     | 1 | 0 | mE1 |
| .....uuagcuggggcaugaucugaugag.....    | 1 | 0 | mE1 |
| .....uuagcuggggcaugaucugaugagc.....   | 1 | 0 | mE1 |
| .....uagcuggggcaugaucugaugagc.....    | 1 | 0 | mE1 |
| .....uagcuggggcaugaucugaugagcu.....   | 1 | 0 | mE1 |
| .....uuagccuagcuuucuguuacaaaaCu.....  | 1 | 1 | mE1 |
| .....ucuuagcuggggcaugaucugauc.....    | 2 | 0 | mbm |
| .....ucuuagcuggggcaugaucugaug.....    | 3 | 0 | mbm |
| .....cuuagcuggggcaugaucugaug.....     | 1 | 0 | mbm |
| .....uuagcuggggcaugaucugauc.....      | 2 | 0 | mbm |
| .....uuagcuggggcaugaucugaugag.....    | 2 | 0 | mbm |
| .....uuagcuggggcaugaucugaugagc.....   | 7 | 0 | mbm |
| .....uagcuggggcaugaucugauc.....       | 1 | 0 | mbm |
| .....uagcuggggcaugaucugaugagc.....    | 8 | 0 | mbm |
| .....uagcuggggcaugaucugaugagcu.....   | 2 | 0 | mbm |
| .....ucuuagcuggggcaugaucugaugag.....  | 1 | 0 | sp1 |
| .....uuagcuggggcaugaucugaugag.....    | 4 | 0 | sp1 |
| .....uuagcuggggcaugaucugaugagc.....   | 1 | 0 | sp1 |
| .....uuagcuggggcaugaucugaugagcu.....  | 1 | 0 | sp1 |
| .....uuagcuggggcaugaucugaugagcuc..... | 9 | 0 | sp1 |
| .....uagcuggggcaugaucugaugag.....     | 1 | 0 | sp1 |
| .....uagcuggggcaugaucugaugagc.....    | 8 | 0 | sp1 |
| .....uagcuggggcaugaucugaugagcu.....   | 1 | 0 | sp1 |
| .....agcuggggcaugaucugaugagcu.....    | 2 | 0 | sp1 |
| .....ucuuagcuggggcaugaucugaugagU..... | 1 | 1 | li2 |
| .....uuagcuggggcaugaucugaug.....      | 1 | 0 | li2 |
| .....uuagcuggggcaugaucugaugagc.....   | 1 | 0 | li2 |
| .....uagcuggggcaugaucugaugag.....     | 1 | 0 | li2 |
| .....uagcuggUcaugaucugaugag.....      | 1 | 1 | li2 |
| .....uagcuggggcaugaucugaugagc.....    | 4 | 0 | li2 |
| .....uagcuggggcauUaucugaugagc.....    | 1 | 1 | li2 |
| .....ucuuagcuggggcaugaucugauga.....   | 1 | 0 | li1 |
| .....uuagcuggggcaugaucugaugag.....    | 4 | 0 | li1 |
| .....uuagcuggggcaugaucugaugagc.....   | 6 | 0 | li1 |
| .....uagcuggggcaugaucugaugag.....     | 1 | 0 | li1 |
| .....uagcuggggcaugaucugaugagc.....    | 6 | 0 | li1 |
| .....uagcuggggcGugaucugaugagcu.....   | 1 | 1 | li1 |
| .....uagcuggggcaugaucugaugagcu.....   | 4 | 0 | li1 |
| .....ucugggcuuagccuagcuuucu.....      | 1 | 0 | li1 |
| .....ucuuagcuggggcaugaucugauc.....    | 1 | 0 | imb |
| .....uuagcuggggcaugaucugaug.....      | 1 | 0 | imb |
| .....ucuuagcuggggcaugaucu.....        | 1 | 0 | sg1 |
| .....uuagcuggggcaugaucugaugag.....    | 1 | 0 | sg1 |
| .....uuagcuggggcaugaucugaugagc.....   | 2 | 0 | sg1 |
| .....uagcuggggcaugaucugaugag.....     | 1 | 0 | sg1 |
| .....ucuuagcuggggcaugauc.....         | 1 | 0 | th2 |
| .....ucuuagcuggggcaugaucu.....        | 7 | 0 | th2 |
| .....ucuuagcuggggcaugaucugauc.....    | 2 | 0 | th2 |
| .....cuuagcuggggcaugaucugaugag.....   | 1 | 0 | th2 |

mmu\_chr10\_1158

aaaaaaaaaacaucugucuuagcuggggcaugaucugaugagcucacagccaggcucucugggcuuagccuagcuuucuguuacaaaaauauauuccuaaaauagguuuugcuuu

|                                        |    |   |     |
|----------------------------------------|----|---|-----|
| .....uuagcuggggcaugaucugau.....        | 1  | 0 | th2 |
| .....uuagcuggggcaugaucugaugag.....     | 1  | 0 | th2 |
| .....uagcuggggcaugaucugau.....         | 1  | 0 | th2 |
| .....uagcuggggcaugaucugaugag.....      | 1  | 0 | th2 |
| .....uagcuggggcaugaucugaugagc.....     | 5  | 0 | th2 |
| .....cuuagcuggggcaugaucugauga.....     | 1  | 0 | Tm1 |
| .....uuagcuggggcaugaucugaA.....        | 1  | 1 | Tm1 |
| .....uuagcuggggcaugaucugauga.....      | 1  | 0 | Tm1 |
| .....uuagcuggggcaugaucugaugag.....     | 1  | 0 | Tm1 |
| .....uuagcuggggcaugaucugaugagU.....    | 1  | 1 | Tm1 |
| .....uuagcuggggcaugaucugaugagc.....    | 4  | 0 | Tm1 |
| .....uagcuggggcaugaucugauga.....       | 3  | 0 | Tm1 |
| .....uagcuggggcaugaucugaugag.....      | 1  | 0 | Tm1 |
| .....uagcuggggcaugaucugaugagc.....     | 20 | 0 | Tm1 |
| .....uagcuggggcaugaucugaugagcu.....    | 1  | 0 | Tm1 |
| .....ucuuagcuggggcaugaucugau.....      | 1  | 0 | em3 |
| .....uuagcuggggcaugaucugauga.....      | 1  | 0 | em3 |
| .....uagcuggggcaugaucugaugagc.....     | 1  | 0 | em3 |
| .....uagcuggggcaugaucugaugagcA.....    | 1  | 1 | em3 |
| .....ucuuagcuggggcaugaucugaugagcu..... | 2  | 0 | mm3 |
| .....uuagcuggggcaugaucugaugag.....     | 1  | 0 | mm3 |
| .....uuagcuggggcaugaucugaugagc.....    | 7  | 0 | mm3 |
| .....uagcuggggcaugaucugaugagc.....     | 6  | 0 | mm3 |
| .....ucuuagcuggggcaugauc.....          | 2  | 0 | th7 |
| .....ucuuagcuggggcaugaucu.....         | 3  | 0 | th7 |
| .....uuagcuggggcaugaucugauga.....      | 1  | 0 | th7 |
| .....uuagcuggggcaugaucugaugag.....     | 1  | 0 | th7 |
| .....uuagcuggggcaugaucugaugagc.....    | 1  | 0 | th7 |
| .....uagcuggggcaugaucugaugag.....      | 1  | 0 | th7 |
| .....uagcuggggcaugaucugaugagc.....     | 2  | 0 | th7 |
| .....ucuuagcuggggcaugauc.....          | 1  | 0 | nct |
| .....uagcuggggcaugaucugaugagcu.....    | 1  | 0 | nct |
| .....ucuuagcuggggcaugaucugau.....      | 1  | 0 | cx1 |
| .....uuagcuggggcaugaucugaugagc.....    | 13 | 0 | cx1 |
| .....uagcuggggcaugaucugaug.....        | 1  | 0 | cx1 |
| .....uagcuggggcaugaucugauga.....       | 1  | 0 | cx1 |
| .....uagcuggggcaugaucugaugagc.....     | 22 | 0 | cx1 |
| .....uagcuggggcaugaucugaugagcA.....    | 1  | 1 | cx1 |
| .....uagcuggggcaugaucugaugagcu.....    | 2  | 0 | cx1 |
| .....agcuggggcaugaucugaugagc.....      | 1  | 0 | cx1 |
| .....cugaugagcucacagccagg.....         | 1  | 0 | cx1 |
| .....cugaugagcucacagccaggcucug.....    | 1  | 0 | cx1 |
| .....cugaugagcucacagccaggcucugg.....   | 1  | 0 | cx1 |
| .....Uuuagcuggggcaugaucugaug.....      | 3  | 1 | Am1 |
| .....uuagcuggggcaugaucugauga.....      | 3  | 0 | Am1 |
| .....uuagcuggggcaugaucugaugagc.....    | 5  | 0 | Am1 |
| .....uagcuggggcaugaucugaugagc.....     | 1  | 0 | Am1 |

Provisional ID : chr15\_37558  
 Score total : 406.2  
 Score for star read(s) : 3.9  
 Score for read counts : 395.8  
 Score for mfe : 1.9  
 Score for randfold : 1.6  
 Score for cons. seed : 3  
 Total read count : 788  
 Mature read count : 785  
 Loop read count : 1  
 Star read count : 2

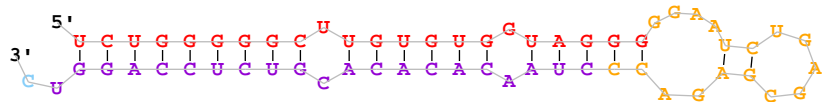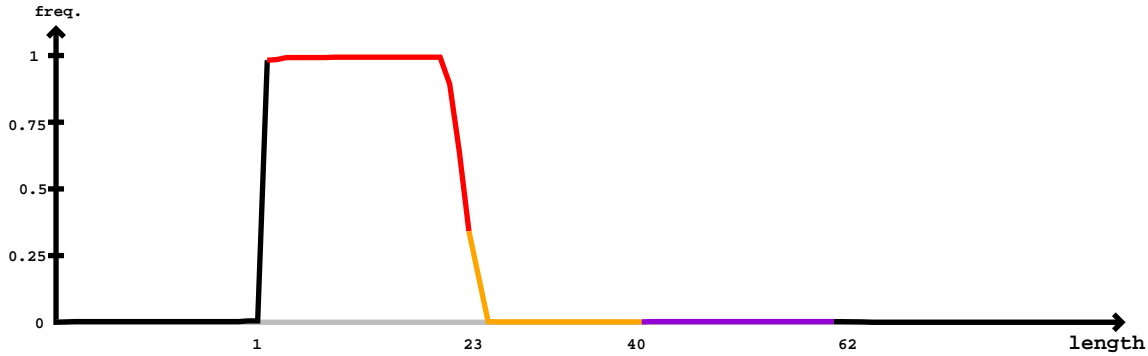

**Mature**

**Star**

| 5' -                                                                                                        | reads | mm | obs | sample |
|-------------------------------------------------------------------------------------------------------------|-------|----|-----|--------|
| ucuggaugggaaugaugucaucugggggcuugugugguaggggaaucugagcgagaccuaaacacacacgucuccaggucacuuuguuuacagccucgcacucacuc | 1     | 0  | exp | nkc    |
| ucuggaugggaaugaugucaucugggggcuugugugguaggggaaucugagcgagaccuaaacacacacgucuccaggucacuuuguuuacagccucgcacucacuc | 1     | 0  | exp | mdc    |
| ucuggaugggaaugaugucaucugggggcuugugugguaggggaaucugagcgagaccuaaacacacacgucuccaggucacuuuguuuacagccucgcacucacuc | 1     | 0  | exp | CFU    |
| ucuggaugggaaugaugucaucugggggcuugugugguaggggaaucugagcgagaccuaaacacacacgucuccaggucacuuuguuuacagccucgcacucacuc | 3     | 0  | exp | 48t    |
| ucuggaugggaaugaugucaucugggggcuugugugguaggggaaucugagcgagaccuaaacacacacgucuccaggucacuuuguuuacagccucgcacucacuc | 1     | 0  | exp | 48t    |
| ucuggaugggaaugaugucaucugggggcuugugugguaggggaaucugagcgagaccuaaacacacacgucuccaggucacuuuguuuacagccucgcacucacuc | 1     | 0  | exp | 48t    |
| ucuggaugggaaugaugucaucugggggcuugugugguaggggaaucugagcgagaccuaaacacacacgucuccaggucacuuuguuuacagccucgcacucacuc | 1     | 0  | exp | mzb    |
| ucuggaugggaaugaugucaucugggggcuugugugguaggggaaucugagcgagaccuaaacacacacgucuccaggucacuuuguuuacagccucgcacucacuc | 1     | 0  | exp | lun    |
| ucuggaugggaaugaugucaucugggggcuugugugguaggggaaucugagcgagaccuaaacacacacgucuccaggucacuuuguuuacagccucgcacucacuc | 1     | 0  | exp | gcb    |
| ucuggaugggaaugaugucaucugggggcuugugugguaggggaaucugagcgagaccuaaacacacacgucuccaggucacuuuguuuacagccucgcacucacuc | 6     | 0  | exp | gcb    |
| ucuggaugggaaugaugucaucugggggcuugugugguaggggaaucugagcgagaccuaaacacacacgucuccaggucacuuuguuuacagccucgcacucacuc | 17    | 0  | exp | gcb    |
| ucuggaugggaaugaugucaucugggggcuugugugguaggggaaucugagcgagaccuaaacacacacgucuccaggucacuuuguuuacagccucgcacucacuc | 36    | 0  | exp | gcb    |
| ucuggaugggaaugaugucaucugggggcuugugugguaggggaaucugagcgagaccuaaacacacacgucuccaggucacuuuguuuacagccucgcacucacuc | 76    | 0  | exp | gcb    |
| ucuggaugggaaugaugucaucugggggcuugugugguaggggaaucugagcgagaccuaaacacacacgucuccaggucacuuuguuuacagccucgcacucacuc | 3     | 0  | exp | gcb    |
| ucuggaugggaaugaugucaucugggggcuugugugguaggggaaucugagcgagaccuaaacacacacgucuccaggucacuuuguuuacagccucgcacucacuc | 1     | 0  | exp | gcb    |
| ucuggaugggaaugaugucaucugggggcuugugugguaggggaaucugagcgagaccuaaacacacacgucuccaggucacuuuguuuacagccucgcacucacuc | 1     | 0  | exp | gcb    |
| ucuggaugggaaugaugucaucugggggcuugugugguaggggaaucugagcgagaccuaaacacacacgucuccaggucacuuuguuuacagccucgcacucacuc | 1     | 1  | exp | ut2    |
| ucuggaugggaaugaugucaucugggggcuugugugguaggggaaucugagcgagaccuaaacacacacgucuccaggucacuuuguuuacagccucgcacucacuc | 1     | 0  | exp | hr1    |
| ucuggaugggaaugaugucaucugggggcuugugugguaggggaaucugagcgagaccuaaacacacacgucuccaggucacuuuguuuacagccucgcacucacuc | 1     | 0  | exp | je1    |
| ucuggaugggaaugaugucaucugggggcuugugugguaggggaaucugagcgagaccuaaacacacacgucuccaggucacuuuguuuacagccucgcacucacuc | 1     | 1  | exp | je1    |
| ucuggaugggaaugaugucaucugggggcuugugugguaggggaaucugagcgagaccuaaacacacacgucuccaggucacuuuguuuacagccucgcacucacuc | 2     | 0  | exp | pcl    |
| ucuggaugggaaugaugucaucugggggcuugugugguaggggaaucugagcgagaccuaaacacacacgucuccaggucacuuuguuuacagccucgcacucacuc | 1     | 0  | exp | pcl    |
| ucuggaugggaaugaugucaucugggggcuugugugguaggggaaucugagcgagaccuaaacacacacgucuccaggucacuuuguuuacagccucgcacucacuc | 1     | 0  | exp | pcl    |

Mature

Star

ucuggaugggaaugaugucaucugggggcuugugugguaggggaaucugagcgagaccuaacacacacgucuccaggucacuuuguuucacagccucgcacucacuc

|                                   |    |   |     |
|-----------------------------------|----|---|-----|
| .....ucugggggcuugugugguag.....    | 2  | 0 | kdn |
| .....ucugggggcuugugugguagg.....   | 2  | 0 | kdn |
| .....ucugggggcuugugugguaggg.....  | 1  | 0 | kdn |
| .....caucugggggcuugugugguag.....  | 2  | 0 | gc2 |
| .....ucugggggcuugugugguua.....    | 15 | 0 | gc2 |
| .....ucugggggcuugugugguag.....    | 32 | 0 | gc2 |
| .....ucugggggcuugugugguagg.....   | 43 | 0 | gc2 |
| .....ucugggggcuugugugguaggg.....  | 46 | 0 | gc2 |
| .....ucugggggcuugugugguagggg..... | 1  | 0 | gc2 |
| .....ugggggcuugugugguaggg.....    | 2  | 0 | gc2 |
| .....ucugggggcuugugugguag.....    | 1  | 0 | sp2 |
| .....ucugggggcuugugugguagg.....   | 1  | 0 | sp2 |
| .....ucugggggcuugugugguaggg.....  | 6  | 0 | sp2 |
| .....ugggggcuugugugguaggg.....    | 1  | 0 | sp2 |
| .....ucaucugggggcuugugugguua..... | 1  | 0 | mus |
| .....ucugggggcuugugugguua.....    | 3  | 0 | mus |
| .....ucugggggcuugugugguag.....    | 2  | 0 | mus |
| .....ucugggggcuugugugguaggg.....  | 1  | 0 | mus |
| .....ucugggggcuugugugguag.....    | 1  | 0 | skn |
| .....ucugggggcuugugugguagg.....   | 1  | 0 | skn |
| .....ucugggggcuugugugguaggg.....  | 1  | 0 | skn |
| .....ucugggggcuugugugguua.....    | 4  | 0 | nt2 |
| .....ucugggggcuugugugguag.....    | 2  | 0 | nt2 |
| .....ucugggggcuugugugguagg.....   | 6  | 0 | nt2 |
| .....ucugggggcuugugugguaggg.....  | 1  | 0 | nt2 |
| .....cugggggcuugugugguaggg.....   | 1  | 0 | nt2 |
| .....ucugggggcuugugugguua.....    | 1  | 0 | itr |
| .....ucugggggcuugugugguag.....    | 9  | 0 | itr |
| .....ucugggggcuugugugguagg.....   | 10 | 0 | itr |
| .....ucugggggcuugugugguaggg.....  | 6  | 0 | itr |
| .....ucugggggcuugugugguagggg..... | 1  | 0 | itr |
| .....ucugggggcuugugugguagg.....   | 1  | 0 | bm2 |
| .....ucugggggcuugugugguua.....    | 7  | 0 | c8t |
| .....ucugggggcuugugugguag.....    | 19 | 0 | c8t |
| .....ucugggggcuugugugguagg.....   | 13 | 0 | c8t |
| .....ucugggggcuugugugguaggg.....  | 5  | 0 | c8t |
| .....ucugggggcuugugugguag.....    | 1  | 0 | li3 |
| .....ucugggggcuugugugguagg.....   | 2  | 0 | li3 |
| .....ucugggggcuugugugguaggU.....  | 1  | 1 | hi2 |
| .....ucugggggcuugugugguua.....    | 6  | 0 | ntr |
| .....ucugggggcuugugugguag.....    | 13 | 0 | ntr |
| .....ucugggggcuugugugguagg.....   | 13 | 0 | ntr |
| .....ucugggggcuugugugguaggg.....  | 8  | 0 | ntr |
| .....ucugggggcuugugugguag.....    | 2  | 0 | pan |
| .....ucugggggcuugugugguagg.....   | 3  | 0 | pan |
| .....ucugggggcuugugugguaggg.....  | 2  | 0 | pan |
| .....ucugggggcuugugugguag.....    | 1  | 0 | nt1 |
| .....ucugggggcuugugugguaggg.....  | 1  | 0 | nt1 |
| .....uaacacacacgucuccagguaU.....  | 1  | 1 | hr3 |
| .....ggaaucugagcgagacc.....       | 1  | 0 | ay2 |
| .....ucugggggcuugugugguua.....    | 9  | 0 | c4t |
| .....ucugggggcuugugugguag.....    | 9  | 0 | c4t |
| .....ucugggggcuugugugguagg.....   | 9  | 0 | c4t |

Mature

Star

|                                                                                                             |    |   |     |
|-------------------------------------------------------------------------------------------------------------|----|---|-----|
| ucuggaugggaaugaugucaucugggggcuugugugguaggggaaucugagcgagaccuaacacacacgucuccaggucacuuuguuucacagccucgcacucacuc |    |   |     |
| .....ucugggggcuugugugguaggg.....                                                                            | 6  | 0 | c4t |
| .....ucugggggcuugugugguagga.....                                                                            | 1  | 1 | tp2 |
| .....ucugggggcuuguguggua.....                                                                               | 5  | 0 | pob |
| .....ucugggggcuugugugguag.....                                                                              | 8  | 0 | pob |
| .....ucugggggcuugugugguaggg.....                                                                            | 20 | 0 | pob |
| .....ucugggggcuugugugguagggg.....                                                                           | 31 | 0 | pob |
| .....ugggggcuugugugguaggg.....                                                                              | 2  | 0 | pob |
| .....ucugggggcuuguguggua.....                                                                               | 2  | 0 | peb |
| .....ucugggggcuugugugguag.....                                                                              | 12 | 0 | peb |
| .....ucugggggcuugugugguaggg.....                                                                            | 20 | 0 | peb |
| .....ucugggggcuugugugguagggg.....                                                                           | 8  | 0 | peb |
| .....ucugggggcuugugugguagggg.....                                                                           | 1  | 0 | peb |
| .....ucugggggcuugugugguaggg.....                                                                            | 1  | 0 | tp1 |
| .....ucugggggcuuguguggua.....                                                                               | 1  | 0 | bac |
| .....ucugggggcuugugugguag.....                                                                              | 4  | 0 | bac |
| .....ucugggggcuugugugguaggg.....                                                                            | 1  | 0 | bac |
| .....ucugggggcuugugugguagggg.....                                                                           | 2  | 0 | bac |
| .....gcuugugugggaggggg.....                                                                                 | 1  | 1 | ool |
| .....ucugggggcuugugugguaggg.....                                                                            | 1  | 0 | 3Ta |
| .....ucugggggcuugugugguag.....                                                                              | 2  | 0 | sp1 |
| .....ucugggggcuugugugguaggg.....                                                                            | 1  | 0 | sp1 |
| .....ucugggggcuugugugguagggg.....                                                                           | 3  | 0 | sp1 |
| .....ucugggggcuugugugguagggg.....                                                                           | 1  | 1 | li2 |
| ucuggUugggaaugaug.....                                                                                      | 1  | 1 | li1 |
| .....ucugggggcuuguguggua.....                                                                               | 6  | 0 | imb |
| .....ucugggggcuugugugguag.....                                                                              | 5  | 0 | imb |
| .....ucugggggcuugugugguaggg.....                                                                            | 7  | 0 | imb |
| .....ucugggggcuugugugguagggg.....                                                                           | 10 | 0 | imb |
| .....ucugggggcuugugugguag.....                                                                              | 2  | 0 | bm1 |
| .....ucugggggcuuguguggua.....                                                                               | 6  | 0 | th2 |
| .....ucugggggcuugugugguag.....                                                                              | 11 | 0 | th2 |
| .....ucugggggcuugugugguaggg.....                                                                            | 11 | 0 | th2 |
| .....ucugggggcuugugugguagggg.....                                                                           | 7  | 0 | th2 |
| .....ucugggggcuuguguggua.....                                                                               | 1  | 0 | sg1 |
| .....ucugggggcuugugugguag.....                                                                              | 2  | 0 | sg1 |
| .....ucugggggcuugugugguaggg.....                                                                            | 6  | 0 | sg1 |
| .....ucugggggcuugugugguagggg.....                                                                           | 2  | 0 | sg1 |
| .....ucugggggcuugugugguag.....                                                                              | 4  | 0 | nt4 |
| .....ucugggggcuugugugguaggg.....                                                                            | 3  | 0 | nt4 |
| .....ucugggggcuugugugguagggg.....                                                                           | 7  | 0 | nt4 |
| .....ucugggggcuugugugguagggg.....                                                                           | 1  | 0 | nt4 |
| .....cuaacacacacgucuccaggua.....                                                                            | 1  | 0 | nt4 |
| .....ucugggggcuugugugguaggg.....                                                                            | 1  | 0 | mm3 |
| .....ucugggggcuugugugguagggg.....                                                                           | 4  | 0 | mm3 |
| .....ucugggggcuugugugguag.....                                                                              | 5  | 0 | th7 |
| .....ucugggggcuugugugguaggg.....                                                                            | 3  | 0 | th7 |
| .....ucugggggcuugugugguagggg.....                                                                           | 2  | 0 | th7 |
| .....ucugggggcuuguguggua.....                                                                               | 6  | 0 | nct |
| .....ucugggggcuugugugguag.....                                                                              | 24 | 0 | nct |
| .....ucugggggcuugugugguaggg.....                                                                            | 17 | 0 | nct |
| .....ucugggggcuugugugguagggg.....                                                                           | 10 | 0 | nct |



Star

Mature

|                                                                                                                   |    |   |     |
|-------------------------------------------------------------------------------------------------------------------|----|---|-----|
| ggugcuggagcucggagcggaccocgggucucccguagcccgggcgguugcuucccggagagucgcccggggaugcagcgcacggggcgagagaagcuccaaagcuucccaag |    |   |     |
| .....gaugcagcgcacggggcgagaga.....                                                                                 | 5  | 0 | gcb |
| .....gucgccgugggaugcagc.....                                                                                      | 1  | 0 | ut2 |
| .....ugggaugcagcgcacggggcgaU.....                                                                                 | 1  | 1 | ut2 |
| .....gggaugcagcgcacggggcgagaA.....                                                                                | 1  | 1 | ut2 |
| .....ggaugcagcgcacggggcgagaA.....                                                                                 | 1  | 1 | ut2 |
| .....gaugcagcgcacggggcgagU.....                                                                                   | 1  | 1 | ut2 |
| .....gaugcagcgcacggggcgagaU.....                                                                                  | 2  | 1 | ut2 |
| .....gaugcagcgcacggggcgagaAa.....                                                                                 | 1  | 1 | ut2 |
| .....gaugcagcgcacggggcgagagU.....                                                                                 | 5  | 1 | ut2 |
| .....gaugcagcgcacggggcgagaga.....                                                                                 | 3  | 0 | ut2 |
| .....gaugcagcgcacggggcgagagUa.....                                                                                | 1  | 1 | ut2 |
| .....ggaugcagcgcacggggcgaga.....                                                                                  | 1  | 0 | kdn |
| .....gaugcagcgcacggggcgag.....                                                                                    | 1  | 0 | kdn |
| .....gaugcagcgcacggggcgaga.....                                                                                   | 1  | 0 | kdn |
| .....gaugcagcgcacggggcgagag.....                                                                                  | 1  | 0 | kdn |
| .....gaugcagcgcacggggcgagaga.....                                                                                 | 1  | 0 | kdn |
| .....gaugcagcgcacggggcgaga.....                                                                                   | 1  | 0 | h11 |
| .....gaugcagcgcacggggcgagagU.....                                                                                 | 3  | 1 | h11 |
| .....ggaugcagcgcacggggcgagaU.....                                                                                 | 1  | 1 | h1c |
| .....gaugcagcgcacggggcgagaU.....                                                                                  | 1  | 1 | h1c |
| .....gaugcagcgcacggggcgagaga.....                                                                                 | 1  | 1 | h1c |
| .....gaugcagcgcacggggcgagagU.....                                                                                 | 10 | 1 | h1c |
| .....gaugcagcgcacggggcgagagUa.....                                                                                | 1  | 1 | h1c |
| .....gaugcagcgcacggggcgagagaaU.....                                                                               | 1  | 1 | h1c |
| .....gaugcagcgcacggggcgag.....                                                                                    | 1  | 0 | mus |
| .....gaugcagcgcacggggcgaga.....                                                                                   | 1  | 0 | mus |
| .....ggaugcagcgcacggggcgaga.....                                                                                  | 2  | 0 | itr |
| .....gaugcagcgcacggggcgag.....                                                                                    | 7  | 0 | itr |
| .....gaugcagcgcacggggcgaga.....                                                                                   | 5  | 0 | itr |
| .....gaugcagcgcacggggcgagag.....                                                                                  | 4  | 0 | itr |
| .....gaugcagcgcacggggcgagagU.....                                                                                 | 1  | 1 | em2 |
| .....gaugcagcgcacggggcgag.....                                                                                    | 1  | 0 | bm2 |
| .....gaugcagcgcacggggcgagag.....                                                                                  | 3  | 0 | bm2 |
| .....gaugcagcgcacggggcgagaga.....                                                                                 | 1  | 0 | bm2 |
| .....gaugcagcgcacggggcgagagaa.....                                                                                | 1  | 0 | bm2 |
| .....gaugcagcgcacggggcgagU.....                                                                                   | 1  | 1 | br2 |
| .....gaugcagcgcacggggcgagagU.....                                                                                 | 1  | 1 | br2 |
| .....gaugcagcgcacggggcgagaga.....                                                                                 | 1  | 1 | Tm2 |
| .....gcucggagcggaccocgggucucccguag.....                                                                           | 1  | 0 | hi2 |
| .....ugggaugcagcgcacggggcgaU.....                                                                                 | 1  | 1 | hi2 |
| .....gaugcagcgcacggggcgag.....                                                                                    | 1  | 0 | hi2 |
| .....gaugcagcgcacggggcgaga.....                                                                                   | 1  | 0 | hi2 |
| .....gaugcagcgcacggggcga.....                                                                                     | 1  | 0 | em1 |
| .....gaugcagcgcacggggcgagag.....                                                                                  | 1  | 0 | em1 |
| .....gaugcagcgcacggggcgag.....                                                                                    | 13 | 0 | ntr |
| .....gaugcagcgcacggggcgaga.....                                                                                   | 1  | 0 | ntr |
| .....gaugcagcgcacggggcgagag.....                                                                                  | 7  | 0 | ntr |
| .....gaugcagcgcacggggcgagaga.....                                                                                 | 1  | 0 | ntr |
| .....ggaugcagcgcacggggcgagaU.....                                                                                 | 1  | 1 | hr3 |
| .....gaugcagcgcacggggcgagagU.....                                                                                 | 1  | 1 | ay2 |
| .....guagcccgggcgguugcuuccc.....                                                                                  | 1  | 0 | hi1 |
| .....gaugcagcgcacggggcgagagU.....                                                                                 | 1  | 1 | hi1 |
| .....gaugcagcgcacggggcgagagUa.....                                                                                | 1  | 1 | hi1 |
| .....gugcuggagcucggagcgc.....                                                                                     | 1  | 0 | Tp2 |



Star

Mature

|                                                                                                                 |    |   |     |
|-----------------------------------------------------------------------------------------------------------------|----|---|-----|
| ggugcuggagcucggagcggaccgccggucucccgagaccggggcggugcuucccgagagucgcccggggaugcagcgcacggggcgagagaagcuccaaagcuucccaag |    |   |     |
| .gugcuggagcucggagcggaccgcg.....                                                                                 | 1  | 0 | Tp2 |
| .....gaucagcgcacggggcgaga.....                                                                                  | 1  | 0 | Tp1 |
| .....gaucagcgcacggggcgagagU.....                                                                                | 2  | 1 | Tp1 |
| .....aucagcgcacggggcgag.....                                                                                    | 1  | 0 | Tp1 |
| .....gaucagcgcacggggcgagag.....                                                                                 | 1  | 0 | nb3 |
| .....gaucagcgcacggggcgag.....                                                                                   | 2  | 0 | bac |
| .....gaucagcgcacggggcgaga.....                                                                                  | 1  | 0 | bac |
| .....gaucagcgcacggggcgagag.....                                                                                 | 1  | 0 | bac |
| .....gaucagcgcacggggcgagaga.....                                                                                | 2  | 0 | bac |
| .....gaucagcgcacggggcgag.....                                                                                   | 2  | 0 | sp1 |
| .....gaucagcgcacggggcgaga.....                                                                                  | 1  | 0 | sp1 |
| .....gaucagcgcacggggcgagag.....                                                                                 | 7  | 0 | sp1 |
| .....aucagcgcacggggcgagagaag.....                                                                               | 1  | 0 | sp1 |
| .....ugggaugcagcgcacggggcga.....                                                                                | 1  | 0 | 3Ta |
| .....Cggaugcagcgcacggggcgaga.....                                                                               | 1  | 1 | 3Ta |
| .....ggaugcagcgcacggggcgaga.....                                                                                | 1  | 0 | 3Ta |
| .....gaucagcgcacggggcgaga.....                                                                                  | 4  | 0 | 3Ta |
| .....gaucagcgcacggggcgagag.....                                                                                 | 2  | 0 | 3Ta |
| .....gaucagcgcacggggcgagaU.....                                                                                 | 1  | 1 | 3Ta |
| .....gaucagcCcacggggcgagag.....                                                                                 | 1  | 1 | 3Ta |
| .....gaucagcgcacggggcgagaga.....                                                                                | 1  | 0 | 3Ta |
| .....gaucagcgcacggggcgagagU.....                                                                                | 14 | 1 | 3Ta |
| .....gaucagcgcacggggcgagagaU.....                                                                               | 1  | 1 | 3Ta |
| .....gaucagcgcacggggcgagagaUa.....                                                                              | 3  | 1 | 3Ta |
| .....cucggagcggaccgccggucucc.....                                                                               | 1  | 0 | li2 |
| .....uuccccgaUagucgccguggau.....                                                                                | 1  | 1 | li2 |
| .....gaucagcgcacggggcgagag.....                                                                                 | 1  | 0 | li2 |
| .....gaucagcgcacggggcgagaU.....                                                                                 | 1  | 1 | li2 |
| .....gaucagcgcacggggcgagagU.....                                                                                | 2  | 1 | li2 |
| .....gaucagcgcacggggcgagagaA.....                                                                               | 1  | 1 | li2 |
| .....gaucagcgcacggggcgag.....                                                                                   | 3  | 0 | imb |
| .....gaucagcgcacggggcgaga.....                                                                                  | 8  | 0 | imb |
| .....gaucagcgcacggggcgagag.....                                                                                 | 25 | 0 | imb |
| .....gaucagcgcacggggcgagaga.....                                                                                | 5  | 0 | imb |
| .....gaucagcgcacggggcgagagaa.....                                                                               | 2  | 0 | imb |
| .....ggaugcagcgcacggggcgag.....                                                                                 | 1  | 0 | bm1 |
| .....gaucagcgcacggggcgag.....                                                                                   | 6  | 0 | bm1 |
| .....gaucagcgcacggggcgaga.....                                                                                  | 2  | 0 | bm1 |
| .....gaucagcgcacggggcgagag.....                                                                                 | 7  | 0 | bm1 |
| .....gaucagcgcacggggcgagaga.....                                                                                | 5  | 0 | bm1 |
| .....gaucagcgcacggggcgagagaa.....                                                                               | 1  | 0 | bm1 |
| .....ggaugcagcgcacggggcgagaU.....                                                                               | 1  | 1 | em3 |
| .....gaucagcgcacggggcgagagU.....                                                                                | 3  | 1 | em3 |
| .....gaucagcgcacggggcgagagaa.....                                                                               | 1  | 0 | mm3 |
| .....gucgccgugggaugcagcgc.....                                                                                  | 2  | 0 | cx1 |
| .....gaucagcgcacggggcgagaga.....                                                                                | 1  | 0 | cx1 |
| .....gaucagcgcacggggcgagagU.....                                                                                | 3  | 1 | cx1 |
| .....cagcgcacggggcgagagU.....                                                                                   | 1  | 1 | cx1 |
| .....cacggggcgagagaagcuc.....                                                                                   | 1  | 0 | cx1 |
| .....ggaugcagcgcacggggcgaga.....                                                                                | 1  | 0 | 3T3 |
| .....gaugcaCcgccacggggcgagag.....                                                                               | 1  | 1 | 3T3 |
| .....gaucagcgcacggggcgagaA.....                                                                                 | 1  | 1 | 3T3 |
| .....gaucagcgcacggggcgagagU.....                                                                                | 17 | 1 | 3T3 |
| .....gaucagcgcacggggcgagaga.....                                                                                | 10 | 0 | 3T3 |
| .....gaucagcgcacggggcgag.....                                                                                   | 2  | 0 | mdc |
| .....gaucagcgcacggggcgagag.....                                                                                 | 3  | 0 | mdc |
| .....ugggaugcagcgcacggggcgagU.....                                                                              | 1  | 1 | CFU |

Star

Mature

|                                                                                                                 |    |   |     |
|-----------------------------------------------------------------------------------------------------------------|----|---|-----|
| ggugcuggagcucggagcggaccgcgguccuccgugacccgggcgguugcucccggagagucgcccggggaugcagcgcacgggagagaagaagcuccaaagcuucccaag |    |   |     |
| .....ggaugcagcgcacgggagagU.....                                                                                 | 2  | 1 | CFU |
| .....ggaugcagcgcacgggagaga.....                                                                                 | 1  | 0 | CFU |
| .....gaugcagcgcacgggagag.....                                                                                   | 1  | 0 | CFU |
| .....gCugcagcgcacgggagag.....                                                                                   | 2  | 1 | CFU |
| .....gaugcagcgcacgggagag.....                                                                                   | 4  | 0 | CFU |
| .....gaugcagcgcacgggagaga.....                                                                                  | 2  | 1 | CFU |
| .....gaugcagcgcacgggagagU.....                                                                                  | 7  | 1 | CFU |
| .....gaugcagcgcacgggagCgaga.....                                                                                | 1  | 1 | CFU |
| .....gaugcagcgcacgggagagaga.....                                                                                | 3  | 0 | CFU |
| .....gaugcagcgcacgggagag.....                                                                                   | 3  | 0 | 48t |
| .....gCagcgcacgggagagagaagcu.....                                                                               | 1  | 0 | 48t |
| .....gaugcagcgcacgggagaga.....                                                                                  | 1  | 0 | mzb |
| .....gaugcagcgcacgggagag.....                                                                                   | 3  | 0 | mzb |
| .....gaugcagcgcacgggagagaga.....                                                                                | 2  | 0 | mzb |
| .....gaugcagcgcacgggagag.....                                                                                   | 1  | 0 | SSC |
| .....gaugcagcgcacgggagaga.....                                                                                  | 1  | 0 | hr1 |
| .....ugggaugcagcgcacgggagaga.....                                                                               | 1  | 0 | pcl |
| .....ugggaugcagcgcacgggagag.....                                                                                | 1  | 0 | pcl |
| .....ggaugcagcgcacgggagaga.....                                                                                 | 1  | 0 | pcl |
| .....gaugcagcgcacgggagag.....                                                                                   | 6  | 0 | pcl |
| .....gaugcagcgcacgggagag.....                                                                                   | 12 | 0 | gc2 |
| .....gaugcagcgcacgggagaga.....                                                                                  | 7  | 0 | gc2 |
| .....gaugcagcgcacgggagag.....                                                                                   | 8  | 0 | gc2 |
| .....augcagcgcacgggagaga.....                                                                                   | 1  | 0 | gc2 |
| .....gaugcagcgcacgggagag.....                                                                                   | 1  | 0 | sp2 |
| .....gaugcagcgcacgggagaga.....                                                                                  | 3  | 0 | sp2 |
| .....gaugcagcgcacgggagag.....                                                                                   | 6  | 0 | sp2 |
| .....gaugcagcgcacgggagagaga.....                                                                                | 2  | 0 | sp2 |
| .....gaugcagcgcacgggagag.....                                                                                   | 3  | 0 | skn |
| .....gaugcagcgcacgggagaga.....                                                                                  | 1  | 0 | skn |
| .....gaugcagcgcacgggagag.....                                                                                   | 3  | 0 | skn |
| .....gaugcagcgcacgggagagaga.....                                                                                | 1  | 0 | skn |
| .....gaugcagcgcacgggagag.....                                                                                   | 4  | 0 | nt2 |
| .....gaugcagcgcacgggagaga.....                                                                                  | 1  | 0 | nt2 |
| .....gaugcagcgcacgggagag.....                                                                                   | 2  | 0 | nt2 |
| .....ucggagcggaccgcggu.....                                                                                     | 1  | 0 | mE8 |
| .....guagcccgggcgguuc.....                                                                                      | 1  | 0 | mE8 |
| .....gcUgugggaugcagcgc.....                                                                                     | 1  | 1 | mE8 |
| .....ggaugcagcgcacgggagaga.....                                                                                 | 2  | 0 | mE8 |
| .....gaugcagcgcacgggagaga.....                                                                                  | 1  | 0 | mE8 |
| .....gaugcagcgcacgggagagaU.....                                                                                 | 5  | 1 | mE8 |
| .....gaugcagcgcacgggagag.....                                                                                   | 2  | 0 | mE8 |
| .....gaugcagcgcacgggagagaga.....                                                                                | 4  | 0 | mE8 |
| .....gaugcagcgcacgggagagC.....                                                                                  | 1  | 1 | mE8 |
| .....gaugcagcgcacgggagagG.....                                                                                  | 1  | 1 | mE8 |
| .....gaugcagcgcacgggagagCga.....                                                                                | 1  | 1 | mE8 |
| .....gaugcagcgcacgggagagU.....                                                                                  | 17 | 1 | mE8 |
| .....ggaugcagcgcacgggagagaU.....                                                                                | 1  | 1 | h12 |
| .....gaugcagcgcacgggagagaU.....                                                                                 | 4  | 1 | h12 |
| .....gaugcagcgcacgggagag.....                                                                                   | 1  | 1 | h12 |
| .....gaugcagcgcacgggagag.....                                                                                   | 1  | 1 | h12 |
| .....gaugcagcgcacgggagag.....                                                                                   | 4  | 0 | h12 |
| .....gaugcagcgcacgggagagaga.....                                                                                | 2  | 0 | h12 |
| .....gaugcagcgcacgggagagU.....                                                                                  | 8  | 1 | h12 |
| .....gaugcagcgcacgggagagaaa.....                                                                                | 1  | 0 | h12 |
| .....gaugcagcgcacgggagagaaaU.....                                                                               | 1  | 1 | h12 |
| .....gaugcagcgcacgggagagU.....                                                                                  | 2  | 1 | je2 |

Star

Mature

|                                                                                             |    |   |     |
|---------------------------------------------------------------------------------------------|----|---|-----|
| ggugcuggagcucggagcggaccgccggucucccgagaccggggcgugcuucccgagagucgcccggggaugcagcgcacggggcgagaga | 1  | 1 | je2 |
| .....gaugcagcgcacggggcgagagaU.....                                                          | 7  | 0 | c8t |
| .....gaugcagcgcacggggcgagaga.....                                                           | 3  | 0 | c8t |
| .....gaugcagcgcacggggcgagaga.....                                                           | 2  | 0 | c8t |
| .....gaugcagcgcacggggcgagaga.....                                                           | 1  | 0 | c8t |
| .....gaugcagcgcacggggcgagagaUa.....                                                         | 1  | 1 | ut1 |
| .....gaugcagcgcacggggcgagagaU.....                                                          | 3  | 1 | ut1 |
| .....gaugcagcgcacggggcgagaga.....                                                           | 3  | 0 | ut1 |
| .....gaugcagcgcacggggcgagagaa.....                                                          | 1  | 0 | ut1 |
| .....gaugcagcgcacggggcgagaga.....                                                           | 2  | 0 | nt1 |
| .....gaugcagcgcacggggcgagaga.....                                                           | 1  | 0 | nt1 |
| .....ggaugcagcgcacggggcgagaga.....                                                          | 1  | 0 | c4t |
| .....gaugcagcgcacggggcgagaga.....                                                           | 4  | 0 | c4t |
| .....gaugcagcgcacggggcgagaga.....                                                           | 4  | 0 | c4t |
| .....gaugcagcgcacggggcgagaga.....                                                           | 4  | 0 | c4t |
| .....gaugcagcgcacggggcgagagaa.....                                                          | 1  | 0 | c4t |
| .....ggaugcagcgcacggggcgagaga.....                                                          | 2  | 0 | pob |
| .....gaugcagcgcacggggcgagaga.....                                                           | 3  | 0 | pob |
| .....gaugcagcgcacggggcgagaga.....                                                           | 2  | 0 | pob |
| .....gaugcagcgcacggggcgagaga.....                                                           | 6  | 0 | pob |
| .....gaugcagcgcacggggcgagagaa.....                                                          | 2  | 0 | pob |
| .....gugggaugcagcgcacggggcgagaga.....                                                       | 1  | 0 | peb |
| .....ugggaugcagcgcacggggcgagaga.....                                                        | 1  | 0 | peb |
| .....gaugcagcgcacggggcgagaga.....                                                           | 1  | 0 | peb |
| .....gaugcagcgcacggggcgagaga.....                                                           | 9  | 0 | peb |
| .....gaugcagcgcacggggcgagaga.....                                                           | 11 | 0 | peb |
| .....gaugcagcgcacggggcgagaga.....                                                           | 4  | 0 | peb |
| .....gaugcagcgcacggggcgagagaa.....                                                          | 1  | 0 | peb |
| .....gaugcagcgcacggggcgagaga.....                                                           | 4  | 0 | mbm |
| .....gaugcagcgcacggggcgagaga.....                                                           | 7  | 0 | mbm |
| .....gaugcagcgcacggggcgagagaU.....                                                          | 1  | 1 | ool |
| .....gaugcagcgcacggggcgagaga.....                                                           | 1  | 0 | ool |
| .....gagagucgcccugggaug.....                                                                | 1  | 0 | li1 |
| .....ugggaugcagcgcacggggcgagaga.....                                                        | 1  | 0 | li1 |
| .....gaugcagcgcacggggcgagaga.....                                                           | 1  | 0 | li1 |
| .....gaugcagcgcacggggcgagagaU.....                                                          | 6  | 1 | li1 |
| .....gaugcagcgcacggggcgagagaU.....                                                          | 2  | 1 | li1 |
| .....gagagucgcccugggaugc.....                                                               | 1  | 0 | th2 |
| .....gaugcagcgcacggggcgagaga.....                                                           | 27 | 0 | th2 |
| .....gaugcagcgcacggggcgagaga.....                                                           | 10 | 0 | th2 |
| .....gaugcagcgcacggggcgagaga.....                                                           | 6  | 0 | th2 |
| .....gaugcagcgcacggggcgagaga.....                                                           | 1  | 0 | th2 |
| .....gaugcagcgcacggggcgagaga.....                                                           | 4  | 0 | sg1 |
| .....gaugcagcgcacggggcgagaga.....                                                           | 1  | 0 | sg1 |
| .....gaugcagcgcacggggcgagaga.....                                                           | 7  | 0 | nt4 |
| .....gaugcagcgcacggggcgagaga.....                                                           | 2  | 0 | nt4 |
| .....ggaugcagcgcacggggcgagaga.....                                                          | 1  | 0 | th7 |
| .....ggaugcagcgcacggggcgagaga.....                                                          | 2  | 0 | th7 |
| .....gaugcagcgcacggggcgagaga.....                                                           | 11 | 0 | th7 |
| .....gaugcagcgcacggggcgagaga.....                                                           | 4  | 0 | th7 |
| .....gaugcagcgcacggggcgagaga.....                                                           | 1  | 0 | th7 |
| .....ugggaugcagcgcacggggcgagaga.....                                                        | 1  | 0 | nct |
| .....ugggaugcagcgcacggggcgagaga.....                                                        | 1  | 0 | nct |
| .....ggaugcagcgcacggggcgagaga.....                                                          | 1  | 0 | nct |
| .....gaugcagcgcacggggcgagaga.....                                                           | 6  | 0 | nct |
| .....gaugcagcgcacggggcgagaga.....                                                           | 1  | 0 | nct |

Star

Mature

|                                                                                                                                                   |   |   |     |
|---------------------------------------------------------------------------------------------------------------------------------------------------|---|---|-----|
| ggugcuggagcucggagcggaccgccgguccuccg <u>uagcccg</u> ggcggu <u>gcuuccc</u> gagagucg <u>ccg</u> ugggaugcagcgca <u>cg</u> ggcgagagaagcuccaaagcuuccaag |   |   |     |
| .....gaugcagcgca <u>cg</u> ggcgagag.....                                                                                                          | 1 | 0 | nct |
| .....gaugcagcgca <u>cg</u> ggcgagaga.....                                                                                                         | 1 | 0 | nct |
| .....ugcagcgca <u>cg</u> ggcgagag.....                                                                                                            | 1 | 0 | nct |
| ggugcuggagcucggagc.....                                                                                                                           | 1 | 0 | Aml |



uuacagccgccccaccgcaggcggggaaccugagggcgaggcugugucugacucagccaacucagucgccccgccacaggugaggggggccccgggacaggcuccgacugg

|                                        |    |   |     |
|----------------------------------------|----|---|-----|
| .....aggcggggaaccugagggcgaggcu.....    | 5  | 0 | 48t |
| .....aggcggggaaccugagggcgaggcugu.....  | 1  | 0 | 48t |
| .....ccacucagucgccccgccca.....         | 1  | 0 | 48t |
| .....ccacucagucgccccgccac.....         | 1  | 0 | 48t |
| .....aggcggggaaccugagggcgaggc.....     | 1  | 0 | SSC |
| .....aggcggggaaccugagggcgagg.....      | 1  | 0 | mzb |
| .....aggcggggaaccugagggcgaggcu.....    | 1  | 0 | mzb |
| .....aggcggggaaccugagggcgaggcu.....    | 3  | 0 | t11 |
| .....ccacucagucgccccgccacU.....        | 2  | 1 | t11 |
| .....ccacucagucgccccgccaca.....        | 1  | 0 | t11 |
| .....aggcggggaaccugagggcg.....         | 1  | 0 | gcb |
| .....aggcggggaaccugagggcgag.....       | 8  | 0 | gcb |
| .....aggcggggaaccugagggcgagg.....      | 8  | 0 | gcb |
| .....aggcggggaaccugagggcgaggc.....     | 5  | 0 | gcb |
| .....aggcggggaaccugagggcgaggcu.....    | 14 | 0 | gcb |
| .....aggcggggaaccugagggcgaggcug.....   | 1  | 0 | gcb |
| .....aggcggggaaccugagggcgaggcugu.....  | 1  | 0 | gcb |
| .....aggcggggaaccugagggcgaggcugug..... | 1  | 0 | gcb |
| .....ccacucagucgccccgccca.....         | 1  | 0 | gcb |
| .....ccacucagucgccccgccac.....         | 1  | 0 | gcb |
| .....aggcggggaaccugagggcgaggc.....     | 1  | 0 | ut2 |
| .....aggcggggaaccugagggcgaggA.....     | 1  | 1 | ut2 |
| .....aggcggggaaccugagggcgaggcu.....    | 1  | 0 | ut2 |
| .....aggcggggaaccugagggcgca.....       | 2  | 0 | gc2 |
| .....aggcggggaaccugagggcgag.....       | 2  | 0 | gc2 |
| .....aggcggggaaccugagggcgagg.....      | 1  | 0 | gc2 |
| .....aggcggggaaccugagggcgaggc.....     | 3  | 0 | gc2 |
| .....aggcggggaaccugagggcgaggcu.....    | 5  | 0 | gc2 |
| .....aggcggggaaccugagggcgaggcug.....   | 1  | 0 | gc2 |
| .....gccacucagucgccccgccac.....        | 1  | 0 | gc2 |
| .....ccacucagucgccccgccac.....         | 1  | 0 | gc2 |
| .....aggcggggaaccugagggcg.....         | 1  | 0 | pe1 |
| .....aggcggggaaccugagggcg.....         | 1  | 0 | pe1 |
| .....aggcggggaaccugagggcgca.....       | 1  | 0 | pe1 |
| .....aggcggggaaccugagggcgag.....       | 4  | 0 | pe1 |
| .....aggcggggaaccugagggcgagg.....      | 2  | 0 | pe1 |
| .....aggcggggaaccugagggcgaggc.....     | 1  | 0 | pe1 |
| .....aggcggggaaccugagggcgaggcu.....    | 2  | 0 | pe1 |
| .....aggcggggaaccugagggcgaggcu.....    | 1  | 0 | h11 |
| .....aggcggggaaccugagggcgca.....       | 1  | 0 | h1c |
| .....aggcggggaaccugagggcgag.....       | 1  | 0 | h1c |
| .....aggcggggaaccugagggcgagg.....      | 1  | 0 | h1c |
| .....aggcggggaaccugagggcgagU.....      | 1  | 1 | h1c |
| .....aggcggggaaccugagggcg.....         | 1  | 0 | sp2 |
| .....aggcggggaaccugagggcg.....         | 1  | 0 | sp2 |
| .....aggcggggaaccugagggcgca.....       | 2  | 0 | sp2 |
| .....aggcggggaaccugagggcgag.....       | 3  | 0 | sp2 |
| .....aggcggggaaccugagggcgagg.....      | 2  | 0 | sp2 |
| .....aggcggggaaccugagggcgaggc.....     | 1  | 0 | sp2 |
| .....aggcggggaaccugagggcgaggcu.....    | 4  | 0 | sp2 |
| .....aggcggggaaccugagggcgaggcug.....   | 1  | 0 | sp2 |
| .....aggcggggaaccugagggcg.....         | 1  | 0 | mus |
| .....aggcggggaaccugagggcgag.....       | 1  | 0 | mus |
| .....aggcggggaaccugagggcgaggc.....     | 1  | 0 | mus |
| .....aggcggggaaccugagggcgca.....       | 2  | 0 | nt2 |
| .....aggcggggaaccugagggcgca.....       | 1  | 0 | skn |

uuacagcgcgccccaccgcaggcggggaaccugagggcgagggcugugucugacucagccaacucagucgccccgccacaggugaggggggccccgggacagggcuccgacugg

|                                       |    |   |     |
|---------------------------------------|----|---|-----|
| .....aggcggggaaccugagggcgag.....      | 1  | 0 | skn |
| .....aggcggggaaccugagggcgagg.....     | 1  | 0 | skn |
| .....aggcggggaaccugagggcgc.....       | 1  | 0 | itr |
| .....aggcggggaaccugagggcgca.....      | 6  | 0 | itr |
| .....aggcggggaaccugagggcgag.....      | 6  | 0 | itr |
| .....aggcggggaaccugagggcgaggc.....    | 1  | 0 | itr |
| .....aggcggggaaccugagggcg.....        | 1  | 0 | bm2 |
| .....aggcggggaaccugagggcgca.....      | 2  | 0 | bm2 |
| .....aggcggggaaccugagggcgag.....      | 3  | 0 | bm2 |
| .....aggcggggaaccugagggcgagg.....     | 2  | 0 | bm2 |
| .....aggcggggaaccugagggcgaggc.....    | 1  | 0 | bm2 |
| .....aggcggggaaccugagggcgaggcu.....   | 1  | 0 | bm2 |
| .....aggcggggaaccugagggcgag.....      | 1  | 0 | h12 |
| .....aggcggggaaccugagggcgaggU.....    | 1  | 1 | h12 |
| .....aggcggggaaccugagggcgaggcu.....   | 1  | 0 | h12 |
| .....aggcggggaaccugagggcgaggcu.....   | 1  | 0 | ut1 |
| .....aggcggggaaccugagggcgca.....      | 4  | 0 | c8t |
| .....aggcggggaaccugagggcgag.....      | 2  | 0 | c8t |
| .....aggcggggaaccugagggcgaggc.....    | 1  | 0 | c8t |
| .....aggcggggaaccugagggcgaggcu.....   | 2  | 0 | c8t |
| .....aggcggggaaccugagggcgaggcugu..... | 1  | 0 | c8t |
| .....gccacucagucgccccgccaca.....      | 1  | 0 | c8t |
| .....aggcggggaaccugagggcgaggcu.....   | 1  | 0 | hi2 |
| .....ccacucagucgccccgccacU.....       | 2  | 1 | hi2 |
| .....aggcggggaaccugagggc.....         | 1  | 0 | Tm2 |
| .....aggcggggaaccugagggcgCggcu.....   | 1  | 1 | Tm2 |
| .....aggcggggaaccugagggcg.....        | 2  | 0 | ntr |
| .....aggcggggaaccugagggcgca.....      | 9  | 0 | ntr |
| .....aggcggggaaccugagggcgag.....      | 6  | 0 | ntr |
| .....ccacucagucgccccgccca.....        | 1  | 0 | ntr |
| .....ccacucagucgccccgccac.....        | 1  | 0 | ntr |
| .....aggcggggaaccugagggcg.....        | 1  | 0 | nt1 |
| .....aggcggggaaccugagggcgc.....       | 1  | 0 | c4t |
| .....aggcggggaaccugagggcgca.....      | 1  | 0 | c4t |
| .....aggcggggaaccugagggcgag.....      | 4  | 0 | c4t |
| .....aggcggggaaccugagggcgagg.....     | 5  | 0 | c4t |
| .....aggcggggaaccugagggcgaggcu.....   | 3  | 0 | c4t |
| .....ccacucagucgccccgccac.....        | 1  | 0 | c4t |
| .....aggcggggaaccugagggcgcaU.....     | 1  | 1 | ay2 |
| .....aggcggggaaccugagggcgaggcugu..... | 2  | 0 | Tp2 |
| .....ucugacucagccaacucagucgcccc.....  | 1  | 0 | Tp2 |
| .....aggcggggaaccugagggcg.....        | 1  | 0 | pob |
| .....aggcggggaaccugagggcgc.....       | 2  | 0 | pob |
| .....aggcggggaaccugagggcgca.....      | 7  | 0 | pob |
| .....aggcggggaaccugagggcgag.....      | 14 | 0 | pob |
| .....aggcggggaaccugagggcgagg.....     | 9  | 0 | pob |
| .....aggcggggaaccugagggcgaggc.....    | 3  | 0 | pob |
| .....aggcggggaaccugagggcgaggcu.....   | 13 | 0 | pob |
| .....aggcggggaaccugagggcgaggcug.....  | 5  | 0 | pob |
| .....aggcggggaaccugagggcgc.....       | 2  | 0 | peb |
| .....aggcggggaaccugagggcgca.....      | 8  | 0 | peb |
| .....aggcggggaaccugagggcgag.....      | 10 | 0 | peb |
| .....aggcggggaaccugagggcgagg.....     | 3  | 0 | peb |
| .....aggcggggaaccugagggcgaggc.....    | 4  | 0 | peb |
| .....aggcggggaaccugagggcgaggcu.....   | 5  | 0 | peb |

uuacagcgcgccccaccgagggcggggaaccugagggcgagggcugugucugacucagccaacucagucgccccgccacaggugaggggggccccgggacagggcuccgacugg

|                                        |    |   |     |
|----------------------------------------|----|---|-----|
| .....gccaucagucgccccgccac.....         | 2  | 0 | peb |
| .....ccacucagucgccccgccac.....         | 1  | 0 | peb |
| .....aggcggggaaccugagggcgcaA.....      | 1  | 1 | Tp1 |
| .....aggcggggaaccugagggcgagA.....      | 1  | 1 | Tp1 |
| .....aggcggggaaccugagggcgagggcu.....   | 3  | 0 | Tp1 |
| .....aggcggggaaccugagggcgagggcuAu..... | 1  | 1 | Tp1 |
| .....aggcggggaaccugagggcgagggcugu..... | 1  | 0 | Tp1 |
| .....aggcggggaaccugagggcg.....         | 1  | 0 | bac |
| .....aggcggggaaccugagggcgca.....       | 1  | 0 | bac |
| .....aggcggggaaccugagggcgag.....       | 2  | 0 | bac |
| .....aggcggggaaccugagggcgaggg.....     | 1  | 0 | bac |
| .....aggcggggaaccugagggcgagggc.....    | 1  | 0 | bac |
| .....aggcggggaaccugagggcgag.....       | 1  | 0 | mbm |
| .....aggcggggaaccugagggcgaggg.....     | 1  | 0 | mbm |
| .....aggcggggaaccugagggcgagA.....      | 1  | 1 | 3Ta |
| .....aggcggggaaccugagggcg.....         | 2  | 0 | sp1 |
| .....aggcggggaaccugagggcgca.....       | 1  | 0 | sp1 |
| .....aggcggggaaccugagggcgag.....       | 2  | 0 | sp1 |
| .....aggcggggaaccugagggcgaggg.....     | 7  | 0 | sp1 |
| .....aggcggggaaccugagggcgagggc.....    | 1  | 0 | sp1 |
| .....aggcggggaaccugagggcgagggcu.....   | 12 | 0 | sp1 |
| .....aggcggggaaccugagggcgagggcugu..... | 2  | 0 | sp1 |
| .....aggcggggaaccugagggcgag.....       | 1  | 0 | li2 |
| .....aggcggggaaccugagggcgagggcu.....   | 2  | 0 | li2 |
| .....ccacucagucgccccgccA.....          | 1  | 1 | li2 |
| .....ccacucagucgccccgccU.....          | 1  | 1 | li2 |
| .....aggcggggaaccugagggcg.....         | 1  | 0 | li1 |
| .....aggcggggaaccugagggcgca.....       | 3  | 0 | li1 |
| .....aggcggggaaccugagggcgagggcugu..... | 1  | 0 | li1 |
| .....aggcggggaaccugagggcg.....         | 1  | 0 | imb |
| .....aggcggggaaccugagggcg.....         | 1  | 0 | imb |
| .....aggcggggaaccugagggcgca.....       | 3  | 0 | imb |
| .....aggcggggaaccugagggcgag.....       | 7  | 0 | imb |
| .....aggcggggaaccugagggcgaggg.....     | 2  | 0 | imb |
| .....ccacucagucgccccgccA.....          | 1  | 0 | imb |
| .....aggcggggaaccugagggcgca.....       | 1  | 0 | bm1 |
| .....aggcggggaaccugagggcgag.....       | 6  | 0 | bm1 |
| .....aggcggggaaccugagggcgaggg.....     | 5  | 0 | bm1 |
| .....aggcggggaaccugagggcgagggc.....    | 2  | 0 | bm1 |
| .....aggcggggaaccugagggcgagggcu.....   | 1  | 0 | bm1 |
| .....aggcggggaaccugagggcgagggcugu..... | 1  | 0 | bm1 |
| .....aggcggggaaccugagggcgagggcugu..... | 2  | 0 | bm1 |
| .....aggcggggaaccugagggcg.....         | 4  | 0 | th2 |
| .....aggcggggaaccugagggcg.....         | 5  | 0 | th2 |
| .....aggcggggaaccugagggcgca.....       | 22 | 0 | th2 |
| .....aggcggggaaccugagggcgag.....       | 33 | 0 | th2 |
| .....aggcggggaaccugagggcgaggg.....     | 9  | 0 | th2 |
| .....aggcggggaaccugagggcgagggc.....    | 7  | 0 | th2 |
| .....aggcggggaaccugagggcgagggcu.....   | 23 | 0 | th2 |
| .....aggcggggaaccugagggcgagggcugu..... | 3  | 0 | th2 |
| .....ccacucagucgccccgccA.....          | 1  | 0 | th2 |
| .....aggcggggaaccugagggcgca.....       | 2  | 0 | sg1 |
| .....aggcggggaaccugagggcgag.....       | 2  | 0 | sg1 |
| .....aggcggggaaccugagggcgagggc.....    | 3  | 0 | sg1 |
| .....aggcggggaaccugagggcgaggg.....     | 2  | 0 | nt4 |
| .....aggcggggaaccugagggcgagggcu.....   | 2  | 0 | nt4 |
| .....aggcggggaaccugagggcgag.....       | 1  | 0 | Tm1 |



uuacagcgcgccccaccgcaggcggggaaccugaggcgcaggcugugucugacucagccaacucagucgccccgccacaaggugaggggggccccgggacaggcuccgacugg

|                                       |   |   |     |
|---------------------------------------|---|---|-----|
| .....aggcggggaaccugaggcg.....         | 2 | 0 | th7 |
| .....aggcggggaaccugaggcgc.....        | 1 | 0 | th7 |
| .....aggcggggaaccugaggcgca.....       | 2 | 0 | th7 |
| .....aggcggggaaccugaggcgcag.....      | 7 | 0 | th7 |
| .....aggcggggaaccugaggcgcagg.....     | 4 | 0 | th7 |
| .....aggcggggaaccugaggcgcaggc.....    | 3 | 0 | th7 |
| .....aggcggggaaccugaggcgcaggcu.....   | 1 | 0 | th7 |
| .....ccacucagucgccccgccac.....        | 1 | 0 | th7 |
| .....ccacucagucgccccgccacU.....       | 1 | 1 | cx1 |
| .....aggcggggaaccugaggcg.....         | 3 | 0 | nct |
| .....aggcggggaaccugaggcgca.....       | 7 | 0 | nct |
| .....aggcggggaaccugaggcgcag.....      | 1 | 0 | nct |
| .....aggcggggaaccugaggcgcagg.....     | 2 | 0 | nct |
| .....aggcggggaaccugaggcgcaggcug.....  | 1 | 0 | nct |
| .....aggcggggaaccugaggcgcaggcugu..... | 1 | 0 | nct |
| .....aggcggggaaccugaggcgc.....        | 1 | 0 | Am1 |



augguggcacagagaaaaugcagucagcuuuccguguuucgucugaccaucugggaauucuaaaacucacuggaaagguggaacacggaacaacacucccucgugugcag

|                                     |    |   |     |
|-------------------------------------|----|---|-----|
| .....cuuuccguguuucgucugacc.....     | 2  | 0 | gcb |
| .....uuuccguguuucgucugac.....       | 3  | 0 | gcb |
| .....uuuccguguuucgucugacc.....      | 17 | 0 | gcb |
| .....uuuccguguuucgucugacca.....     | 29 | 0 | gcb |
| .....uuuccguguuucgucugaccac.....    | 27 | 0 | gcb |
| .....uuuccguguuucgucugaccacu.....   | 5  | 0 | gcb |
| .....uucccguguuucgucugacc.....      | 1  | 0 | gcb |
| .....uucccguguuucgucugacca.....     | 1  | 0 | gcb |
| .....uucccguguuucgucugaccac.....    | 2  | 0 | gcb |
| .....uucccguguuucgucugaccacu.....   | 12 | 0 | gcb |
| .....acuggaaaagguggaacacgg.....     | 3  | 0 | gcb |
| .....acuggaaaagguggaacacgga.....    | 3  | 0 | gcb |
| .....acuggaaaagguggaacacggaa.....   | 3  | 0 | gcb |
| .....cuggaaaagguggaacacgga.....     | 1  | 0 | gcb |
| .....cuggaaaagguggaacacggaa.....    | 3  | 0 | gcb |
| .....uggaaaagguggaacacgga.....      | 15 | 0 | gcb |
| .....uggaaaagguggaacacggaa.....     | 33 | 0 | gcb |
| .....uggaaaagguggaacacggaac.....    | 12 | 0 | gcb |
| .....uggaaaagguggaacacggaaca.....   | 11 | 0 | gcb |
| .....uggaaaagguggaacacggaacaa.....  | 5  | 0 | gcb |
| .....gaaaagguggaacacggaa.....       | 1  | 0 | gcb |
| .....uuuccguguuucgucugac.....       | 6  | 0 | c4t |
| .....uuuccguguuucgucugacc.....      | 11 | 0 | c4t |
| .....uuuccguguuucgucugacca.....     | 25 | 0 | c4t |
| .....uuuccguguuucgucugaccac.....    | 1  | 0 | c4t |
| .....uuuccguguuucgucugaccacu.....   | 1  | 0 | c4t |
| .....uucccguguuucgucugacc.....      | 3  | 0 | c4t |
| .....uucccguguuucgucugacca.....     | 1  | 0 | c4t |
| .....uucccguguuucgucugaccacu.....   | 2  | 0 | c4t |
| .....acuggaaaagguggaacacgg.....     | 1  | 0 | c4t |
| .....acuggaaaagguggaacacggaa.....   | 2  | 0 | c4t |
| .....cuggaaaagguggaacacgga.....     | 1  | 0 | c4t |
| .....cuggaaaagguggaacacggaa.....    | 1  | 0 | c4t |
| .....uggaaaagguggaacacgga.....      | 5  | 0 | c4t |
| .....uggaaaagguggaacacggaac.....    | 31 | 0 | c4t |
| .....uggaaaagguggaacacggaac.....    | 1  | 0 | c4t |
| .....uggaaaagguggaacacggaaca.....   | 2  | 0 | c4t |
| .....cuuuccguguuucgucugacca.....    | 1  | 0 | pob |
| .....cuuuccguguuucgucugaccac.....   | 1  | 0 | pob |
| .....uuuccguguuucgucugac.....       | 3  | 0 | pob |
| .....uuuccguguuucgucugacc.....      | 4  | 0 | pob |
| .....uuuccguguuucgucugacca.....     | 9  | 0 | pob |
| .....uuuccguguuucgucugaccac.....    | 16 | 0 | pob |
| .....uuuccguguuucgucugaccacu.....   | 6  | 0 | pob |
| .....uucccguguuucgucugacca.....     | 1  | 0 | pob |
| .....uucccguguuucgucugaccacu.....   | 10 | 0 | pob |
| .....acuggaaaagguggaacacggaac.....  | 1  | 0 | pob |
| .....uggaaaagguggaacacgga.....      | 1  | 1 | pob |
| .....uggaaaagguggaacacggaa.....     | 6  | 0 | pob |
| .....uggaaaagguggaacacggaaca.....   | 1  | 0 | pob |
| .....uggaaaagguggaacacggaacaa.....  | 3  | 0 | pob |
| .....cuuuccguguuucgucugaccac.....   | 1  | 0 | peb |
| .....uuuccguguuucgucugac.....       | 4  | 0 | peb |
| .....uuuccguguuucgucugacc.....      | 7  | 0 | peb |
| .....uuuccguguuucgucugacca.....     | 36 | 0 | peb |
| .....uuuccguguuucgucugaccac.....    | 30 | 0 | peb |
| .....uuuccguguuucgucugaccacu.....   | 11 | 0 | peb |
| .....uucccguguuucgucugaccac.....    | 4  | 0 | peb |
| .....uucccguguuucgucugaccacu.....   | 29 | 0 | peb |
| .....uucccguguuucgucugaccacug.....  | 1  | 0 | peb |
| .....uucccguguuucgucugaccacug.....  | 1  | 0 | peb |
| .....acuggaaaagguggaacacggaa.....   | 2  | 0 | peb |
| .....acuggaaaagguggaacacggaaac..... | 1  | 0 | peb |
| .....cuggaaaagguggaacacgg.....      | 1  | 0 | peb |
| .....cuggaaaagguggaacacgga.....     | 1  | 0 | peb |

augguggcacagagaaaugcagucagcuuuccguguuucgucugaccaucugggaauucuaaacucacuggaaagguggaacacggaacaacacucccucgugucag

|                                       |    |   |     |
|---------------------------------------|----|---|-----|
| .....cugaaaagguggaacacgga.....        | 2  | 0 | peb |
| .....cugaaaagguggaacacggaac.....      | 2  | 0 | peb |
| .....uggaaaagguggaacacgga.....        | 1  | 0 | peb |
| .....uggaaaagguggaacacgga.....        | 20 | 0 | peb |
| .....uggaaaagguggaacacggaac.....      | 4  | 0 | peb |
| .....uggaaaagguggaacacggaaca.....     | 2  | 0 | peb |
| .....uggaaaagguggaacacggaacaa.....    | 3  | 0 | peb |
| .....uggaaaagguggaacacggaacaac.....   | 1  | 0 | peb |
| .....gaaagguggaacacggaacaac.....      | 1  | 0 | peb |
| .....acugaaaagguggaacacgg.....        | 1  | 0 | gc2 |
| .....acugaaaagguggaacacgga.....       | 4  | 0 | gc2 |
| .....acugaaaagguggaacacgga.....       | 10 | 0 | gc2 |
| .....acugaaaagguggaacacggaac.....     | 1  | 0 | gc2 |
| .....cugaaaagguggaacacgg.....         | 1  | 0 | gc2 |
| .....cugaaaagguggaacacgga.....        | 1  | 0 | gc2 |
| .....cugaaaagguggaacacgga.....        | 4  | 0 | gc2 |
| .....uggaaaagguggaacacgga.....        | 18 | 0 | gc2 |
| .....auaacucacugaaaagguggaacacgg..... | 1  | 0 | pc1 |
| .....acugaaaagguggaacacgg.....        | 1  | 0 | pc1 |
| .....acugaaaagguggaacacgga.....       | 2  | 0 | pc1 |
| .....uggaaaagguggaacacgga.....        | 2  | 0 | pc1 |
| .....acugaaaagguggaacacgga.....       | 1  | 0 | bac |
| .....acugaaaagguggaacacgga.....       | 5  | 0 | bac |
| .....cugaaaagguggaacacgga.....        | 1  | 1 | bac |
| .....cugaaaagguggaacacgga.....        | 2  | 0 | bac |
| .....cugaaaagguggaacacgga.....        | 2  | 0 | bac |
| .....uggaaaagguggaacacgga.....        | 1  | 0 | bac |
| .....uggaaaagguggaacacgga.....        | 9  | 0 | bac |
| .....cuuuccguguuucgucugacca.....      | 1  | 0 | sp2 |
| .....cuuuccguguuucgucugaccacu.....    | 1  | 0 | sp2 |
| .....uuuccguguuucgucugac.....         | 2  | 0 | sp2 |
| .....uuuccguguuucgucugacc.....        | 1  | 0 | sp2 |
| .....uuuccguguuucgucugacca.....       | 5  | 0 | sp2 |
| .....uuuccguguuucgucugaccac.....      | 5  | 0 | sp2 |
| .....uuuccguguuucgucugaccacu.....     | 2  | 0 | sp2 |
| .....uuuccguguuucgucugaccacu.....     | 10 | 0 | sp2 |
| .....acugaaaagguggaacacgga.....       | 3  | 0 | sp2 |
| .....acugaaaagguggaacacggaac.....     | 4  | 0 | sp2 |
| .....cugaaaagguggaacacgga.....        | 1  | 0 | sp2 |
| .....cugaaaagguggaacacggaac.....      | 3  | 0 | sp2 |
| .....cugaaaagguggaacacggaaca.....     | 1  | 0 | sp2 |
| .....uggaaaagguggaacacgga.....        | 3  | 0 | sp2 |
| .....uggaaaagguggaacacgga.....        | 6  | 0 | sp2 |
| .....uggaaaagguggaacacggaac.....      | 11 | 0 | sp2 |
| .....uggaaaagguggaacacggaaca.....     | 6  | 0 | sp2 |
| .....uggaaaagguggaacacggaacaa.....    | 5  | 0 | sp2 |
| .....cuuuccguguuucgucugacc.....       | 2  | 0 | sp1 |
| .....cuuuccguguuucgucugacca.....      | 1  | 0 | sp1 |
| .....uuuccguguuucgucugac.....         | 1  | 0 | sp1 |
| .....uuuccguguuucgucugacca.....       | 4  | 0 | sp1 |
| .....uuuccguguuucgucugaccac.....      | 4  | 0 | sp1 |
| .....uuuccguguuucgucugaccacu.....     | 5  | 0 | sp1 |
| .....cugaaaagguggaacacgga.....        | 1  | 0 | sp1 |
| .....uggaaaagguggaacacgga.....        | 2  | 0 | sp1 |
| .....uggaaaagguggaacacgga.....        | 4  | 0 | sp1 |
| .....uggaaaagguggaacacggaac.....      | 3  | 0 | sp1 |
| .....uggaaaagguggaacacggaaca.....     | 4  | 0 | sp1 |
| .....uggaaaagguggaacacggaacaa.....    | 1  | 0 | sp1 |
| .....uggaaaagguggaacacgga.....        | 1  | 0 | skn |
| .....uuuccguguuucgucugaccac.....      | 1  | 0 | nt2 |
| .....cuuuccguguuucgucugacca.....      | 2  | 0 | imb |

augguggcacagagaaaugcagucucagcuuuuccguguuucgucugaccaacugggauucucauaacucacuggaaagguggaacacggaaacaacacucccucgugugcag

|                                    |    |   |     |
|------------------------------------|----|---|-----|
| .....uuuccguguuucgucugacc.....     | 3  | 0 | imb |
| .....uuuccguguuucgucugacca.....    | 4  | 0 | imb |
| .....uuuccguguuucgucugaccac.....   | 2  | 0 | imb |
| .....uuuccguguuucgucugaccacu.....  | 3  | 0 | imb |
| .....uuuccguguuucgucugaccacu.....  | 5  | 0 | imb |
| .....uuccguguuucgucugaccacu.....   | 1  | 0 | imb |
| .....acuggaaagguggaacacggaa.....   | 2  | 0 | imb |
| .....acuggaaagguggaacacggaa.....   | 3  | 0 | imb |
| .....cuggaaagguggaacacggaa.....    | 2  | 0 | imb |
| .....cuggaaagguggaacacggaa.....    | 4  | 0 | imb |
| .....uggaaagguggaacacggaa.....     | 5  | 0 | imb |
| .....uggaaagguggaacacggaa.....     | 12 | 0 | imb |
| .....uggaaagguggaacacggaaac.....   | 3  | 0 | imb |
| .....uggaaagguggaacacggaaacaa..... | 2  | 0 | imb |
| .....uuuccguguuucgucugacca.....    | 1  | 0 | itr |
| .....acuggaaagguggaacacgg.....     | 1  | 0 | th2 |
| .....uggaaagguggaacacggaa.....     | 1  | 0 | th2 |
| .....uuuccguguuucgucugaccacu.....  | 1  | 0 | sg1 |
| .....uggaaagguggaacacggaa.....     | 1  | 0 | sg1 |
| .....uuuccguguuucgucugac.....      | 1  | 0 | nt4 |
| .....uuuccguguuucgucugacc.....     | 1  | 0 | nt4 |
| .....uuuccguguuucgucugacca.....    | 4  | 0 | nt4 |
| .....uuuccguguuucgucugaccac.....   | 1  | 0 | nt4 |
| .....uuuccguguuucgucugaccacu.....  | 1  | 0 | nt4 |
| .....uggaaagguggaacacggaa.....     | 1  | 0 | nt4 |
| .....uggaaagguggaacacggaa.....     | 2  | 0 | th7 |
| .....uuuccguguuucgucugacc.....     | 1  | 0 | c8t |
| .....uuuccguguuucgucugacca.....    | 1  | 0 | c8t |
| .....uuuccguguuucgucugaccacu.....  | 1  | 0 | c8t |
| .....uuuccguguuucgucugaccac.....   | 1  | 0 | nct |
| .....uggaaagguggaacacggaa.....     | 1  | 0 | nct |



gacaggacaugcccuuauacugcugagcuaauucccuaacugcuauguggagcugcaguuagggaauuagcucagcaguaaagggaugacugcucuggaagaggaccca

|                                     |     |   |     |
|-------------------------------------|-----|---|-----|
| .....uagggaaauagcucagcagua.....     | 1   | 0 | mm1 |
| .....guuaggAaaauagcucagcaguu.....   | 1   | 1 | te1 |
| .....uuagggaauuagcucagcaguu.....    | 1   | 0 | em2 |
| .....aguuaagggaauuagcucagcag.....   | 2   | 0 | mE8 |
| .....uuagggaauuagcucagcaguu.....    | 1   | 0 | mE8 |
| .....guuaggAaaauagcucagcaguu.....   | 1   | 1 | ut1 |
| .....uuaggAaaauagcucagcaguu.....    | 1   | 1 | ut1 |
| .....uuaggAaaauagcucagcaguu.....    | 2   | 1 | ut1 |
| .....uagggaaauagcucagcaguu.....     | 1   | 0 | ut1 |
| .....uuaggAaaauagcucagcaguu.....    | 1   | 1 | br2 |
| .....uuaggAaaauagcucagcaguu.....    | 1   | 1 | br2 |
| .....uuaggAaaauagcucagcaguu.....    | 1   | 1 | ov2 |
| .....uuagggaauuagcucagcaguu.....    | 1   | 0 | ntr |
| .....uagggaaauuagcucagcaguu.....    | 1   | 0 | ntr |
| .....guuagggaauuagcucagcaguu.....   | 1   | 0 | mm2 |
| .....uuagggaauuagcucagcaguu.....    | 1   | 0 | mm2 |
| .....uagggaaauuagcucagcaguu.....    | 1   | 1 | hr3 |
| .....aguuaagggaauuagcucagcaguu..... | 1   | 0 | c4t |
| .....uuauacugcugagcuaaa.....        | 1   | 1 | hi1 |
| .....ugcugagcuaauucccuaacug.....    | 1   | 0 | hi1 |
| .....Cacugcucuggaagaggacc.....      | 1   | 1 | Tp2 |
| .....ugcugagcuaauucccuaacu.....     | 1   | 0 | mE1 |
| .....uuaggAaaauagcucagc.....        | 2   | 1 | mE1 |
| .....uuaggAaaauagcucagca.....       | 1   | 1 | mE1 |
| .....uuaggCaaauagcucagcaguu.....    | 1   | 1 | mE1 |
| .....uuaggAaaauagcucagcaguu.....    | 4   | 1 | mE1 |
| .....uuaggAaaauagcucagcaguu.....    | 4   | 1 | mE1 |
| .....uuaggAaaauagcucagcaguu.....    | 3   | 1 | mE1 |
| .....guuaggAaaauagcucagcaguu.....   | 1   | 1 | nb3 |
| .....uuaggAaaauagcucagcaguu.....    | 1   | 1 | nb3 |
| .....cugcugagcuaauucccuaacu.....    | 10  | 0 | 3Ta |
| .....cugcugagcuaauucAcuaacu.....    | 1   | 1 | 3Ta |
| .....guuaggAaaauagcucagcaguu.....   | 11  | 1 | 3Ta |
| .....uuaggAaaauagcucagcaguu.....    | 6   | 1 | 3Ta |
| .....uuaggAaaauagcucagcaguu.....    | 129 | 1 | 3Ta |
| .....uuaggAaaauagcucagcaguu.....    | 125 | 1 | 3Ta |
| .....uuaggAaaauagcucagcaguu.....    | 12  | 1 | 3Ta |
| .....uuaggAaaauagcucagcaguu.....    | 1   | 1 | 3Ta |
| .....uaggAaaauagcucagcaguu.....     | 2   | 1 | 3Ta |
| .....uaggAaaauagcucagcaguu.....     | 1   | 1 | 3Ta |
| .....ugcugagcuaauucccuaacug.....    | 1   | 0 | li2 |
| .....aguuaagggaauuagcucagcaguu..... | 1   | 0 | sg1 |
| .....uuagggaauuagcucagcaguu.....    | 1   | 0 | sg1 |
| .....uagggaaauuagcucagcaguu.....    | 1   | 0 | sg1 |
| .....aguuaagggaauuagcucagcaguu..... | 1   | 0 | nt4 |
| .....uuagggaauuagcucagcaguu.....    | 1   | 0 | nt4 |
| .....uagggaaauuagcucagcaguu.....    | 1   | 0 | nt4 |
| .....uagggaaauuagcucagcaguu.....    | 2   | 0 | nt4 |
| .....uuauacugcugagcuaauucc.....     | 1   | 0 | Tm1 |

gacaggacaugcccuauacugcugagcuaauucccuaacugcuauguggagcugcaguuagggaaauagcucagcaguaaagggaugacugcucuggaagaggaccca

|                                       |    |   |     |
|---------------------------------------|----|---|-----|
| .....uauacugcugagcuaauucccuaacug..... | 1  | 0 | Tm1 |
| .....gcuauuggagcugcag.....            | 1  | 0 | mm3 |
| .....guuagggaaauagcucagcaguu.....     | 2  | 0 | mm3 |
| .....uuagggaaauagcucagcaguu.....      | 3  | 0 | mm3 |
| .....uagggaaauagcucagcaguu.....       | 1  | 0 | mm3 |
| .....uuaggAaaauagcucagcagua.....      | 1  | 1 | nb2 |
| .....ugcugagcuaauucccuaacu.....       | 2  | 0 | Am1 |
| .....ugcugagcuaauAccuaacu.....        | 1  | 1 | Am1 |
| .....ugcugagcuaauucccuaacug.....      | 16 | 0 | Am1 |
| .....ugcCgagcuaauucccuaacug.....      | 1  | 1 | Am1 |



Provisional ID : chr1\_2655  
 Score total : 435.6  
 Score for star read(s) : 3.9  
 Score for read counts : 428.9  
 Score for mfe : 2  
 Score for randfold : -2.2  
 Score for cons. seed : 3  
 Total read count : 853  
 Mature read count : 594  
 Loop read count : 0  
 Star read count : 259

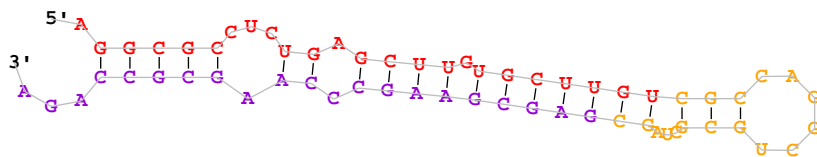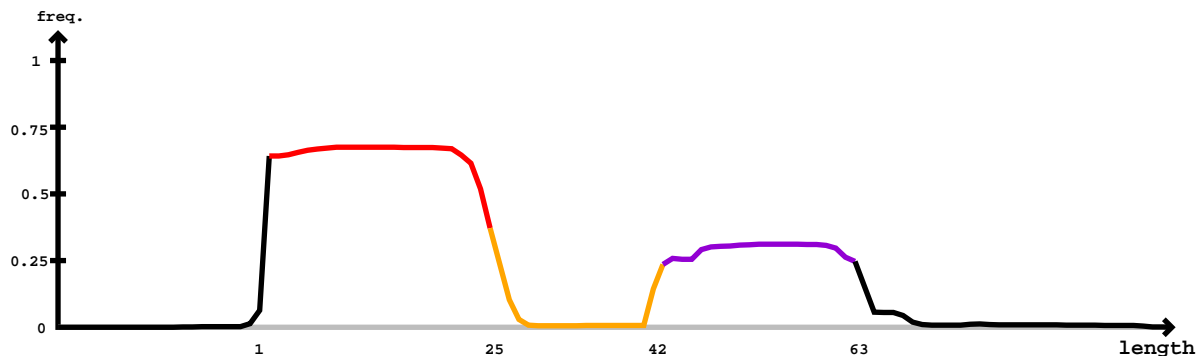

**Mature**

**Star**

| 5' -                                                                               | obs | reads | mm | sample |
|------------------------------------------------------------------------------------|-----|-------|----|--------|
| gagccuggggcaaccugccaggcgccucugagcuugugcuugucgcccaggcugcgcuagcgagcgaagcccaagcgccaga | -3' |       |    |        |
| gagccuggggcaaccugccaggcgccucugagcuugugcuugucgcccaggcugcgcuagcgagcgaagcccaagcgccaga | exp |       |    |        |
| ..(((.....))..(((((((.....))))))))))..))))))..(((.....))..)))))).....              |     |       |    |        |
| .....caggcgccucugagcuuguc.....                                                     |     | 2     | 0  | nkc    |
| .....caggcgccucugagcuugucuu.....                                                   |     | 1     | 0  | nkc    |
| .....caggcgccucugagcuugugcuug.....                                                 |     | 5     | 0  | nkc    |
| .....caggcgccucugagcuugugcuuguc.....                                               |     | 3     | 0  | nkc    |
| .....aggcgccucugagcuugugc.....                                                     |     | 3     | 0  | nkc    |
| .....aggcgccucugagcuugugcu.....                                                    |     | 7     | 0  | nkc    |
| .....aggcgccucugagcuugugcuu.....                                                   |     | 3     | 0  | nkc    |
| .....aggcgccucugagcuugugcuug.....                                                  |     | 30    | 0  | nkc    |
| .....aggcgccucugagcuugugcuugu.....                                                 |     | 32    | 0  | nkc    |
| .....aggcgccucugagcuugugcuuguc.....                                                |     | 10    | 0  | nkc    |
| .....aggcgccucugagcuugugcuugcg.....                                                |     | 20    | 0  | nkc    |
| .....cgagcgaagcccaagcgcca.....                                                     |     | 3     | 0  | nkc    |
| .....cgagcgaagcccaagcgccaga.....                                                   |     | 1     | 0  | nkc    |
| .....gagcgaagcccaagcgccagacc.....                                                  |     | 1     | 0  | nkc    |
| .....aagcccaagcgccagaccuuuu.....                                                   |     | 1     | 0  | nkc    |
| .....gagcgaagcccaagcgccaga.....                                                    |     | 1     | 0  | ay3    |
| .....aggcgccucugagcuugugcuuguc.....                                                |     | 1     | 0  | mdc    |
| .....cgagcgaagcccaagcgcca.....                                                     |     | 1     | 0  | mdc    |
| .....cgagcgaagcccaagcgccag.....                                                    |     | 1     | 0  | mdc    |
| .....caccugccaggcgccucugagcuugugcuugucg.....                                       |     | 1     | 0  | CFU    |
| .....ccugccaggcgccucugagc.....                                                     |     | 1     | 0  | CFU    |
| .....caggcgccucugagcuugugcuug.....                                                 |     | 1     | 0  | CFU    |
| .....aggcgccucugagcuugugcuugu.....                                                 |     | 1     | 0  | CFU    |
| .....caggcugcgcuagcgagcgaagcccaagc.....                                            |     | 1     | 0  | CFU    |
| .....gcuagcagcgaagcccaagcgccagaccuuuu.....                                         |     | 1     | 0  | CFU    |
| .....cgagcgaagcccaagcgccag.....                                                    |     | 1     | 0  | CFU    |
| .....cgagcgaagcccaagcgccCga.....                                                   |     | 1     | 1  | CFU    |
| .....cgagcgaagcccaagcgccaga.....                                                   |     | 2     | 0  | CFU    |
| .....cgCgcgaagcccaagcgccaga.....                                                   |     | 1     | 1  | CFU    |
| .....gagcgaagcccaagcgccCga.....                                                    |     | 2     | 1  | CFU    |

Mature

Star

| Sequence                                                                                                      | Mature Count | Star Count | Label |
|---------------------------------------------------------------------------------------------------------------|--------------|------------|-------|
| gagcccggggcaaccugccaggcgccucugagcuugugcuugucgcccaggcgccuagcgagcgaagcccaagcgccagaccuuuuacuugggacgggcggaagagaag |              |            |       |
| .....gagcgaAAcccaagcgccaga.....                                                                               | 1            | 1          | CFU   |
| .....gagcgaagcccaaCcgccaga.....                                                                               | 1            | 1          | CFU   |
| .....gagcgcCagcccaagcgccaga.....                                                                              | 2            | 1          | CFU   |
| .....gagcgaagcccaagcgccaga.....                                                                               | 13           | 0          | CFU   |
| .....gagcgaagcccaagcgccagC.....                                                                               | 1            | 1          | CFU   |
| .....gagcgaagcccaagcgccagG.....                                                                               | 1            | 1          | CFU   |
| .....gagcgaagccCagcgccaga.....                                                                                | 2            | 1          | CFU   |
| .....gaagcccaagcgccagaccuu.....                                                                               | 1            | 0          | CFU   |
| .....gaCgcccaagcgccagaccuuu.....                                                                              | 1            | 1          | CFU   |
| .....gaagcccaagcgccagaccuuu.....                                                                              | 4            | 0          | CFU   |
| .....gaagcccaagcgccagaccuuuA.....                                                                             | 1            | 1          | CFU   |
| .....gaagcccaagcgccagaccuuu.....                                                                              | 3            | 0          | CFU   |
| .....ccuuuuacuugggacgggc.....                                                                                 | 1            | 0          | CFU   |
| .....aggcgccucugagcuugugcuugu.....                                                                            | 2            | 0          | 48t   |
| .....aagcccaagcgccagac.....                                                                                   | 1            | 0          | mED   |
| .....aggcgccucugagcuugugcuugu.....                                                                            | 1            | 0          | mzb   |
| .....gagcgaAAcccaagcgccaga.....                                                                               | 1            | 1          | t11   |
| .....gagcgaagcccaagcgccaga.....                                                                               | 10           | 0          | t11   |
| .....gaagcccaagcgccagaccuu.....                                                                               | 1            | 0          | t11   |
| .....gaagcccaagcgccagaccuuu.....                                                                              | 2            | 0          | t11   |
| .....ccuuuuacuugggacgggG.....                                                                                 | 1            | 1          | t11   |
| .....ugggacgggGgggaagag.....                                                                                  | 1            | 1          | t11   |
| .....caggcgccucugagcuugugcuugu.....                                                                           | 3            | 0          | gcb   |
| .....aggcgccucugagcuugugc.....                                                                                | 1            | 0          | gcb   |
| .....aggcgccucugagcuugugcuu.....                                                                              | 1            | 0          | gcb   |
| .....aggcgccucugagcuugugcuug.....                                                                             | 10           | 0          | gcb   |
| .....aggcgccucugagcuugugcuugu.....                                                                            | 19           | 0          | gcb   |
| .....aggcgccucugagcuugugcuuguc.....                                                                           | 5            | 0          | gcb   |
| .....aggcgccucugagcuugugcuugcg.....                                                                           | 8            | 0          | gcb   |
| .....cgagcgaagcccaagcgcc.....                                                                                 | 2            | 0          | gcb   |
| .....cgagcgaagcccaagcgcca.....                                                                                | 2            | 0          | gcb   |
| .....cgagcgaagcccaagcgccag.....                                                                               | 1            | 0          | gcb   |
| .....cgagcgaagcccaagcgccaga.....                                                                              | 2            | 0          | gcb   |
| .....gaagcccaagcgccagaccuu.....                                                                               | 1            | 0          | gcb   |
| .....agcccaagcgccagaccuuuuacu.....                                                                            | 1            | 0          | gcb   |
| .....aggcgccucugagcuugugcuug.....                                                                             | 1            | 0          | ut2   |
| .....cgagcgaagcccaagcgccaga.....                                                                              | 1            | 0          | ut2   |
| .....cgagcgaagcccaagcgccaU.....                                                                               | 1            | 1          | je1   |
| .....ccaggcgccucugagcuugugcu.....                                                                             | 1            | 0          | pc1   |
| .....caggcgccucugagcuugugcu.....                                                                              | 1            | 0          | pc1   |
| .....caggcgccucugagcuugugcuu.....                                                                             | 1            | 0          | pc1   |
| .....aggcgccucugagcuugug.....                                                                                 | 3            | 0          | pc1   |
| .....aggcgccucugagcuugugc.....                                                                                | 2            | 0          | pc1   |
| .....aggcgccucugagcuugugcu.....                                                                               | 5            | 0          | pc1   |
| .....aggcgccucugagcuugugcuu.....                                                                              | 17           | 0          | pc1   |
| .....aggcgccucugagcuugugcuug.....                                                                             | 16           | 0          | pc1   |
| .....aggcgccucugagcuugugcuugu.....                                                                            | 27           | 0          | pc1   |
| .....aggcgccucugagcuugugcuuguc.....                                                                           | 3            | 0          | pc1   |
| .....aggcgccucugagcuugugcuugcg.....                                                                           | 2            | 0          | pc1   |
| .....cgagcgaagcccaagcgcc.....                                                                                 | 1            | 0          | pc1   |
| .....cgagcgaagcccaagcgcca.....                                                                                | 3            | 0          | pc1   |
| .....aagcccaagcgccagaccuu.....                                                                                | 1            | 0          | pc1   |
| .....ccaggcgccucugagcuugugcu.....                                                                             | 1            | 0          | gc2   |
| .....ccaggcgccucugagcuugugcuu.....                                                                            | 1            | 0          | gc2   |
| .....caggcgccucugagcuugugcu.....                                                                              | 1            | 0          | gc2   |
| .....caggcgccucugagcuugugcuugcg.....                                                                          | 1            | 0          | gc2   |
| .....aggcgccucugagcuugugc.....                                                                                | 2            | 0          | gc2   |
| .....aggcgccucugagcuugugcu.....                                                                               | 1            | 0          | gc2   |
| .....aggcgccucugagcuugugcuu.....                                                                              | 11           | 0          | gc2   |
| .....aggcgccucugagcuugugcuug.....                                                                             | 13           | 0          | gc2   |
| .....aggcgccucugagcuugugcuugu.....                                                                            | 16           | 0          | gc2   |

Mature

Star

|                                                                                                                 |    |   |     |
|-----------------------------------------------------------------------------------------------------------------|----|---|-----|
| gagcccggggcaaccugccaggcgccucugagcuugugcuugucgcccaggcgcuagcgcgagcgaagcccaagcgccagaccuuuuacuugggacgggagggaagagaag |    |   |     |
| .....aggcgccucugagcuugugcuuguc.....                                                                             | 5  | 0 | gc2 |
| .....aggcgccucugagcuugugcuugucg.....                                                                            | 2  | 0 | gc2 |
| .....cgagcgaagcccaagcgcc.....                                                                                   | 1  | 0 | gc2 |
| .....cgagcgaagcccaagcgcca.....                                                                                  | 3  | 0 | gc2 |
| .....cgagcgaagcccaagcgccag.....                                                                                 | 2  | 0 | gc2 |
| .....cgagcgaagcccaagcgccaga.....                                                                                | 5  | 0 | gc2 |
| .....agcgaagcccaagcgccaga.....                                                                                  | 1  | 0 | gc2 |
| .....aagcccaagcgccagaccuu.....                                                                                  | 1  | 0 | gc2 |
| .....caggcgccucugagcuugugcuu.....                                                                               | 1  | 0 | sp2 |
| .....caggcgccucugagcuugugcuug.....                                                                              | 1  | 0 | sp2 |
| .....aggcgccucugagcuugugcuu.....                                                                                | 1  | 0 | sp2 |
| .....aggcgccucugagcuugugcuug.....                                                                               | 7  | 0 | sp2 |
| .....aggcgccucugagcuugugcuugu.....                                                                              | 14 | 0 | sp2 |
| .....aggcgccucugagcuugugcuuguc.....                                                                             | 4  | 0 | sp2 |
| .....aggcgccucugagcuugugcuugucg.....                                                                            | 8  | 0 | sp2 |
| .....aggcgccucugagcuugugcuugucgc.....                                                                           | 1  | 0 | sp2 |
| .....cgagcgaagcccaagcgcca.....                                                                                  | 2  | 0 | sp2 |
| .....cgagcgaagcccaagcgccaga.....                                                                                | 2  | 0 | sp2 |
| .....gagcgaagcccaagcgccag.....                                                                                  | 1  | 0 | sp2 |
| .....gaagcccaagcgccagaccuu.....                                                                                 | 1  | 0 | sp2 |
| .....aggcgccCucugagcuuguc.....                                                                                  | 2  | 1 | Am2 |
| .....aggcgccucugagcuugugcuu.....                                                                                | 3  | 0 | Am2 |
| .....aggcgccucugagcuugugcuug.....                                                                               | 2  | 0 | Am2 |
| .....aggcgccucugagcuugugcuugu.....                                                                              | 2  | 0 | Am2 |
| .....gccucugagcuugugcuugucgc.....                                                                               | 1  | 0 | Am2 |
| .....uugucgccaggcgcuagcga.....                                                                                  | 2  | 0 | Am2 |
| .....cgagcgaagcccaagcgccaga.....                                                                                | 2  | 0 | te1 |
| .....cgagcgaagcccaagcgcca.....                                                                                  | 1  | 0 | mm1 |
| .....cgagcgaagcccaagcgccaga.....                                                                                | 1  | 0 | mm1 |
| .....gagcgaagcccaagcgccaga.....                                                                                 | 1  | 0 | mm1 |
| .....ccaggcgccucugagcuugugc.....                                                                                | 1  | 0 | skn |
| .....caggcgccucugagcuugugc.....                                                                                 | 1  | 0 | nt2 |
| .....aggcgccucugagcuugugcuug.....                                                                               | 1  | 0 | nt2 |
| .....aggcgccucugagcuugugcuugu.....                                                                              | 1  | 0 | nt2 |
| .....gccucugagcuugugcuugucgc.....                                                                               | 1  | 0 | em2 |
| .....aggcgccucugagcuugugc.....                                                                                  | 1  | 0 | bm2 |
| .....aggcgccucugagcuugugcuugu.....                                                                              | 1  | 0 | bm2 |
| .....cgagcgaagcccaagcgcc.....                                                                                   | 2  | 0 | bm2 |
| .....cgagcgaagcccaagcgcca.....                                                                                  | 1  | 0 | bm2 |
| .....cgagcgaagcccaagcgccaga.....                                                                                | 2  | 0 | bm2 |
| .....ccaggcgccucugagcuugugcuug.....                                                                             | 1  | 0 | mE8 |
| .....caggcgccucugagcuugugcuug.....                                                                              | 1  | 0 | mE8 |
| .....caggcgccucugagcuugugcuuAu.....                                                                             | 3  | 1 | mE8 |
| .....caggcgccucugagcuugugcuugu.....                                                                             | 1  | 0 | mE8 |
| .....aggcgccucugagcuugugcuugucgc.....                                                                           | 1  | 0 | mE8 |
| .....cgccucugagcuugugcuugucg.....                                                                               | 2  | 0 | mE8 |
| .....cgccucugagcuugugcuugucgc.....                                                                              | 3  | 0 | mE8 |
| .....gccucugagcuugugcuuguc.....                                                                                 | 1  | 0 | mE8 |
| .....gccucugagcuugugcuugucgc.....                                                                               | 1  | 0 | mE8 |
| .....ccucugagcuugugcuugucgcc.....                                                                               | 1  | 0 | mE8 |
| .....cgagcgaagcccaagcgcca.....                                                                                  | 1  | 0 | mE8 |
| .....cgagcgaagcccaagcgccag.....                                                                                 | 2  | 0 | mE8 |
| .....cgagcgaagcccaagcgccCga.....                                                                                | 1  | 1 | mE8 |
| .....cgagcgaagcccaagcgccaga.....                                                                                | 25 | 0 | mE8 |
| .....cgagcgaAaccgaagcgccaga.....                                                                                | 1  | 1 | mE8 |
| .....cgagcgaagcccaagcgUcaga.....                                                                                | 1  | 1 | mE8 |
| .....gagcgaagcccaagcgccaga.....                                                                                 | 24 | 0 | mE8 |
| .....agcgaagcccaagcgccaga.....                                                                                  | 9  | 0 | mE8 |
| .....agcgaagcccaagcgccagac.....                                                                                 | 1  | 0 | mE8 |
| .....agcgaagcccaagcgccagaU.....                                                                                 | 1  | 1 | mE8 |
| .....gaagcccaagcgccaga.....                                                                                     | 3  | 0 | mE8 |

Mature

Star

| Sequence                                                                                                            | Mature Count | Star Count | Label |
|---------------------------------------------------------------------------------------------------------------------|--------------|------------|-------|
| gagcccggggcaaccugccaggcgccucugagcuugugcuugucgcccaggcgccgcuagcgagcgaagcccgaagcgcagaccuuuuuuacuugggacgggcggggaagagaag | 3            | 0          | mE8   |
| .....gaagcccaagcgcagaccuu.....                                                                                      | 3            | 0          | mE8   |
| .....gaagcccaagcgcagaccuuu.....                                                                                     | 1            | 0          | mE8   |
| .....aagcccaagcgcagaccuu.....                                                                                       | 1            | 1          | mE8   |
| .....aagcccaagcgcagaccuu.....                                                                                       | 1            | 1          | mE8   |
| .....aagcccaagcgcagaccuu.....                                                                                       | 1            | 1          | mE8   |
| .....aagcccaagcgcagaccuu.....                                                                                       | 1            | 0          | mE8   |
| .....aggcgccucugagcuugugcuug.....                                                                                   | 1            | 1          | je2   |
| .....aggcgccucugagcuugugcuugcU.....                                                                                 | 1            | 1          | je2   |
| .....aggcgccucugagcuugugcuugu.....                                                                                  | 1            | 0          | c8t   |
| .....cgagcgaagcccaagcgcca.....                                                                                      | 1            | 0          | br2   |
| .....aggcgccucugagcuugugcuu.....                                                                                    | 1            | 0          | ay1   |
| .....agccAaagcgcagaccuuuu.....                                                                                      | 1            | 1          | hi2   |
| .....ccaagcgcagaccuuuuacuug.....                                                                                    | 1            | 0          | hi2   |
| .....aggcgccucugagcuugugcu.....                                                                                     | 1            | 0          | Tm2   |
| .....aggcgccucugagcuugugcuuA.....                                                                                   | 1            | 1          | Tm2   |
| .....aggcgccucugagcuugugcuugc.....                                                                                  | 1            | 0          | Tm2   |
| .....aggcgccucugagcuugugcuugu.....                                                                                  | 1            | 0          | ntr   |
| .....aggcgccucugagcuugugcuugc.....                                                                                  | 1            | 0          | ntr   |
| .....cgagcgaagcccaagcgcca.....                                                                                      | 1            | 0          | ntr   |
| .....ugggacgggGgggaagaga..                                                                                          | 1            | 1          | ntr   |
| .....aggcgccucugagcuugugcu.....                                                                                     | 1            | 0          | pan   |
| .....aggcgccucugagcuugugcuu.....                                                                                    | 2            | 0          | pan   |
| .....aggcgccucugagcuugugcuug.....                                                                                   | 2            | 0          | pan   |
| .....aggcgccucugagcuugugcuugu.....                                                                                  | 6            | 0          | pan   |
| .....aggcgccucugagcuugugcuugc.....                                                                                  | 2            | 0          | pan   |
| .....aggcgccucugagcuugugcuu.....                                                                                    | 1            | 0          | mm2   |
| .....Acgccucugagcuugugcuugc.....                                                                                    | 1            | 1          | mm2   |
| .....cgagcgaagcccaagcgccaga.....                                                                                    | 2            | 0          | mm2   |
| .....gagcgaagcccaagcgccaga.....                                                                                     | 3            | 0          | mm2   |
| .....ccaggcgccucugagcuugugcu.....                                                                                   | 1            | 0          | c4t   |
| .....caggcgccucugagcuugugcuu.....                                                                                   | 2            | 0          | c4t   |
| .....aggcgccucugagcuugugcu.....                                                                                     | 2            | 0          | c4t   |
| .....aggcgccucugagcuugugcuu.....                                                                                    | 11           | 0          | c4t   |
| .....aggcgccucugagcuugugcuug.....                                                                                   | 9            | 0          | c4t   |
| .....aggcgccucugagcuugugcuugu.....                                                                                  | 14           | 0          | c4t   |
| .....aggcgccucugagcuugugcuugc.....                                                                                  | 3            | 0          | c4t   |
| .....cgagcgaagcccaagcgcca.....                                                                                      | 3            | 0          | c4t   |
| .....cgagcgaagcccaagcgccaga.....                                                                                    | 1            | 0          | c4t   |
| .....gagcgaagcccaagcgcca.....                                                                                       | 1            | 0          | c4t   |
| .....ugggacgggGgggaagaga..                                                                                          | 1            | 1          | c4t   |
| .....cgagcgaagcccaagcgcca.....                                                                                      | 1            | 0          | hi1   |
| .....cgagcgaagcccaagcgccaga.....                                                                                    | 1            | 0          | hi1   |
| .....gcccaagcgcagaccuuuu.....                                                                                       | 1            | 0          | hi1   |
| .....cccaagcgcagaccuuuu.....                                                                                        | 1            | 0          | hi1   |
| .....aggcgccucugagcuugugcuugc.....                                                                                  | 1            | 0          | pob   |
| .....ccaggcgccucugagcuugugcuuA.....                                                                                 | 1            | 1          | Tp2   |
| .....aggcgccucugagcuugugc.....                                                                                      | 1            | 0          | Tp2   |
| .....caagcgcagaccuuuuacuugg.....                                                                                    | 1            | 0          | Tp2   |
| .....gggacgggGgggaagag.....                                                                                         | 1            | 1          | Tp2   |
| .....caggcgccucugagcuugugcuu.....                                                                                   | 1            | 0          | peb   |
| .....aggcgccucugagcuugugcuugu.....                                                                                  | 5            | 0          | peb   |
| .....aggcgccucugagcuugugcuugc.....                                                                                  | 2            | 0          | peb   |
| .....aggcgccucugagcuugugcuu.....                                                                                    | 1            | 0          | te2   |
| .....aggcgccucugagcuugugcuugu.....                                                                                  | 1            | 0          | te2   |

Mature

Star

gagcccggggcaaccugccaggcgccucugagcuugugcugcgcagggcugcgcuagcgagcgaagcccaagcgccagaccuuuuacuugggacgggcggaagagaag

|                                     |    |   |     |
|-------------------------------------|----|---|-----|
| .....cUccucugagcuuguc.....          | 1  | 1 | Tp1 |
| .....uacuugggacgggcggaagagaag       | 1  | 0 | Tp1 |
| .....caggcgccucugagcuuguc.....      | 1  | 0 | bac |
| .....caggcgccucugagcuugucuu.....    | 2  | 0 | bac |
| .....caggcgccucugagcuugugcuugu..... | 2  | 0 | bac |
| .....aggcgccucugagcuugucuu.....     | 7  | 0 | bac |
| .....aggcgccucugagcuugugcuug.....   | 12 | 0 | bac |
| .....aggcgccucugagcuugugcuugu.....  | 14 | 0 | bac |
| .....aggcgccucugagcuugugcuugc.....  | 3  | 0 | bac |
| .....cgagcgaagcccaagcgcc.....       | 1  | 0 | bac |
| .....cgagcgaagcccaagcgcca.....      | 2  | 0 | bac |
| .....cgagcgaagcccaagcgccag.....     | 1  | 0 | bac |
| .....cgagcgaagcccaagcgccaga.....    | 2  | 0 | bac |
| .....gagcgaagcccaagcgccaga.....     | 1  | 0 | bac |
| .....agcgaagcccaagcgccag.....       | 1  | 0 | bac |
| .....aggcgccucuaagcuugucuu.....     | 1  | 1 | mE1 |
| .....aggcgccucugagcuugugcuuguc..... | 2  | 0 | mE1 |
| .....gcgccucugagcuugugcuuu.....     | 2  | 0 | mE1 |
| .....gcgccucugagcuugugcuug.....     | 1  | 0 | mE1 |
| .....cgccucugagcuugugcuugc.....     | 1  | 0 | mE1 |
| .....cgagcgaagcccaagcgcc.....       | 1  | 0 | mE1 |
| .....cgagcgaagcccaagcgccaga.....    | 1  | 0 | mE1 |
| .....gagcgaagcccaagcgccaga.....     | 2  | 0 | mE1 |
| .....gagcgaagcccaagcgccagac.....    | 1  | 0 | mE1 |
| .....gaagcccCagcgccagaccuuu.....    | 2  | 1 | mE1 |
| .....gaagcccagcgccagaccuuu.....     | 1  | 0 | mE1 |
| .....aggcgccucugagcuugugcuugu.....  | 1  | 0 | mbm |
| .....aggcgccucugagcuugugcuugc.....  | 1  | 0 | mbm |
| .....cgagcgaagcccaagcgccaga.....    | 1  | 0 | mbm |
| .....agcgaagcccaagcgccag.....       | 1  | 0 | mbm |
| .....gaagcccagcgccagaccuuu.....     | 1  | 0 | mbm |
| .....caggcgccucugagcuugugcuuu.....  | 2  | 0 | sp1 |
| .....caggcgccucugagcuugugcuugu..... | 3  | 0 | sp1 |
| .....aggcgccucugagcuugugcuuu.....   | 2  | 0 | sp1 |
| .....aggcgccucugagcuugugcuug.....   | 3  | 0 | sp1 |
| .....aggcgccucugagcuugugcuugu.....  | 4  | 0 | sp1 |
| .....aggcgccucugagcuugugcuugc.....  | 3  | 0 | sp1 |
| .....aggcgccucugagcuugugcuugc.....  | 5  | 0 | sp1 |
| .....cucugagcuugugcuugcgcc.....     | 1  | 0 | sp1 |
| .....cuugucgccagggcugcgcuag.....    | 1  | 0 | sp1 |
| .....cgagcgaagcccaagcgcc.....       | 1  | 0 | sp1 |
| .....cgagcgaagcccaagcgcca.....      | 1  | 0 | sp1 |
| .....cgagcgaagcccaagcgccag.....     | 1  | 0 | sp1 |
| .....gagcgaagcccaagcgccaga.....     | 1  | 0 | sp1 |
| .....agcgaagcccaagcgccaga.....      | 1  | 0 | sp1 |
| .....gaagcccagcgccagaccuu.....      | 1  | 0 | sp1 |
| .....gccucugagcuugugcuugc.....      | 1  | 0 | li2 |
| .....ccucugagcuugugcuugcgc.....     | 1  | 0 | li2 |
| .....cgagcgaagcccaagcgcc.....       | 1  | 0 | li2 |
| .....cgagcgaagcccaagcgcca.....      | 1  | 0 | li2 |
| .....cgagcgaagcccaagcgccaga.....    | 3  | 0 | li2 |
| .....gagcgaagcccaagcgcca.....       | 1  | 0 | li2 |
| .....gagcgaagcccaagcgccagac.....    | 1  | 0 | li2 |
| .....gaagcccagcgccagaccuu.....      | 1  | 1 | li2 |
| .....gggacgggGgggaagaga.....        | 1  | 1 | li2 |
| .....aggcgccucugagcuugugcuugu.....  | 3  | 0 | li1 |
| .....aggcgccucugagcuugugcuugc.....  | 1  | 0 | li1 |
| .....cgccucugagcuugugcuugcgc.....   | 1  | 0 | li1 |
| .....gccucugagcuugugcuugcgc.....    | 1  | 0 | li1 |
| .....ccucugagcuugugcuugcgc.....     | 2  | 0 | li1 |
| .....cucugagcuugugcuugc.....        | 1  | 0 | li1 |
| .....cucugagcuugugcuugcgc.....      | 1  | 0 | li1 |
| .....ucugagcuugugcuugcgc.....       | 3  | 0 | li1 |

Mature

Star

|                                                                                                                |   |   |     |
|----------------------------------------------------------------------------------------------------------------|---|---|-----|
| gagcccggggcaaccugccaggcgccucugagcuugugcuugucgccaggcgcgcuagcgagcgaagcccaagcgccagaccuuuuacuugggacggcggggaagagaag |   |   |     |
| .....cgagcgaagcccaagcUc.....                                                                                   | 1 | 1 | li1 |
| .....cgagcgaagcccaagcgccaga.....                                                                               | 4 | 0 | li1 |
| .....gagcgaagcccaagcgccaga.....                                                                                | 3 | 0 | li1 |
| .....agcgaagcccaagcgccaga.....                                                                                 | 1 | 0 | li1 |
| .....agcgaagcccaCgcgccaga.....                                                                                 | 1 | 1 | li1 |
| .....ccaagcgccagaccuuuu.....                                                                                   | 1 | 0 | li1 |
| .....aggcgccucugagcuugugcuug.....                                                                              | 2 | 0 | imb |
| .....aggcgccucugagcuugugcuug.....                                                                              | 1 | 0 | imb |
| .....aggcgccucugagcuugugcuugc.....                                                                             | 1 | 0 | imb |
| .....agcgaagcccaagcgccaga.....                                                                                 | 1 | 0 | imb |
| .....caggcgccucugagcuugugc.....                                                                                | 2 | 0 | th2 |
| .....caggcgccucugagcuugugcu.....                                                                               | 1 | 0 | th2 |
| .....caggcgccucugagcuugugcuugu.....                                                                            | 1 | 0 | th2 |
| .....aggcgccucugagcuugugc.....                                                                                 | 1 | 0 | th2 |
| .....aggcgccucugagcuugugcu.....                                                                                | 3 | 0 | th2 |
| .....aggcgccucugagcuugugcuu.....                                                                               | 5 | 0 | th2 |
| .....aggcgccucugagcuugugcuug.....                                                                              | 1 | 0 | th2 |
| .....aggcgccucugagcuugugcuugu.....                                                                             | 3 | 0 | th2 |
| .....aggcgccucugagcuugugcuugc.....                                                                             | 1 | 0 | th2 |
| .....aggcgccucugagcuugugcuugcg.....                                                                            | 1 | 0 | th2 |
| .....cgagcgaagcccaagcgccaga.....                                                                               | 2 | 0 | th2 |
| .....agcgaagcccaagcgccaga.....                                                                                 | 2 | 0 | th2 |
| .....gaagcccaagcgccagaccuuu.....                                                                               | 1 | 0 | th2 |
| .....aggcgccucugagcuugugc.....                                                                                 | 1 | 0 | Tm1 |
| .....aggcgccucugagcuugugcu.....                                                                                | 1 | 0 | Tm1 |
| .....aggcgccucugagcuuguUcuug.....                                                                              | 1 | 1 | Tm1 |
| .....aggcgccucugagcuugugcuug.....                                                                              | 3 | 0 | Tm1 |
| .....aggAgccucugagcuugugcuugcg.....                                                                            | 1 | 1 | Tm1 |
| .....aggcgccucugagcuugugcuugcg.....                                                                            | 2 | 0 | Tm1 |
| .....cgagcgaagcccaagcgccaga.....                                                                               | 1 | 0 | Tm1 |
| .....gagcgaagcccaagcgccaga.....                                                                                | 1 | 0 | Tm1 |
| .....aggcgccucugagcuugugcuu.....                                                                               | 1 | 0 | em3 |
| .....cgagcgaagcccaagcGA.....                                                                                   | 1 | 1 | em3 |
| .....cgagcgaagcccaagcgcca.....                                                                                 | 1 | 0 | em3 |
| .....cgagcgaagcccaagcgccag.....                                                                                | 1 | 0 | em3 |
| .....Acaggcgccucugagcuugugcuugu.....                                                                           | 1 | 1 | mm3 |
| .....cgagcgaagcccaagcgccagU.....                                                                               | 1 | 1 | mm3 |
| .....cgagcgaagcccaagcgccaga.....                                                                               | 4 | 0 | mm3 |
| .....gagcgaagcccaagcgccaga.....                                                                                | 4 | 0 | mm3 |
| .....gaagcccaagcgccagaccuuu.....                                                                               | 1 | 0 | mm3 |
| .....aggcgccucugagcuugugc.....                                                                                 | 1 | 0 | th7 |
| .....ccaagcgccagaccuuuuacuug.....                                                                              | 1 | 0 | cx1 |
| .....caagcgccagaccuuuu.....                                                                                    | 1 | 0 | cx1 |
| .....aggcgccucugagcuugugcuugu.....                                                                             | 1 | 0 | nct |
| .....ccaggcgccucugagcuugugcuu.....                                                                             | 2 | 0 | Am1 |
| .....aggcgccCcuugagcuugugc.....                                                                                | 1 | 1 | Am1 |
| .....aggcgccucugagcuugugc.....                                                                                 | 2 | 0 | Am1 |
| .....aggcgccucugagcuugugcuu.....                                                                               | 2 | 0 | Am1 |
| .....aggcgccucugagcuugugcuug.....                                                                              | 5 | 0 | Am1 |
| .....aggcgccucugagcuugugcuuA.....                                                                              | 1 | 1 | Am1 |
| .....Uggcgccucugagcuugugcuugu.....                                                                             | 1 | 1 | Am1 |
| .....aggcgccucugagcuugugcuugu.....                                                                             | 1 | 0 | Am1 |
| .....aggcgccucugagcuugugcuugCcg.....                                                                           | 2 | 1 | Am1 |
| .....aggcgccucugagcuugugcuugcg.....                                                                            | 1 | 0 | Am1 |
| .....gccucugagcuugugcuugcg.....                                                                                | 1 | 0 | Am1 |
| .....uuugcgccaggcgcuagcga.....                                                                                 | 1 | 0 | Am1 |

miRBase precursor : mmu\_chr5\_30975  
 Total read count : 581  
 mmu\_chr5\_30975 read count 560  
 mmu\_chr5\_30975\* read count 1  
 remaining reads : 21

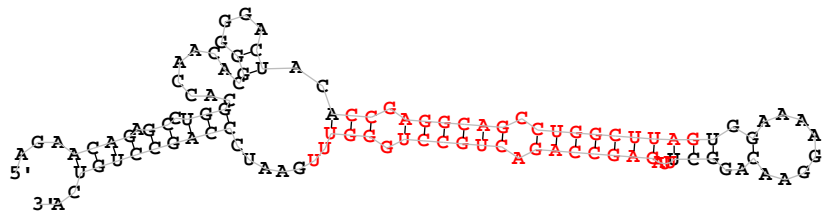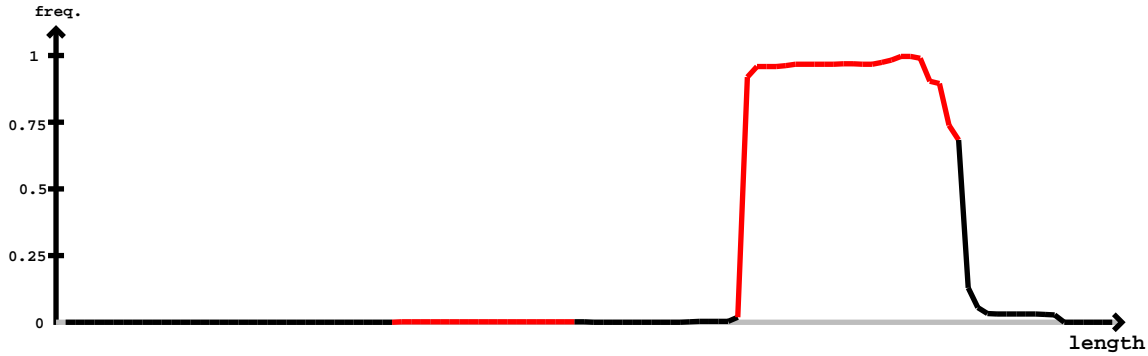

mmu\_chr5\_30975

mmu\_chr5\_30975\*

| 5' -                                                                                                          | reads | mm | exp | sample |
|---------------------------------------------------------------------------------------------------------------|-------|----|-----|--------|
| agaacagagccuggcaccacacgggggacuacaccgaggcagccuggcuuaguggaaaaggaacaggcuuuagagccagacugccuggguuuugaaucccagccuguca | 1     | 0  |     | nkc    |
| uuagagccagacugccuggguuu                                                                                       | 5     | 0  |     | ay3    |
| uuagagccagacugccuggguuu                                                                                       | 1     | 1  |     | ay3    |
| uuagagccagacugccuggguuC                                                                                       | 1     | 1  |     | ay3    |
| uagagccagacugccuggguuu                                                                                        | 2     | 0  |     | ay3    |
| uggguuCgaaucccagc                                                                                             | 2     | 1  |     | ay3    |
| uuagagccagacugccuggguuu                                                                                       | 1     | 0  |     | CFU    |
| ccuggguuCgaauccca                                                                                             | 1     | 1  |     | mED    |
| uggguuCgaaucccagc                                                                                             | 1     | 1  |     | mED    |
| uuagagccagacugccuggguuu                                                                                       | 1     | 0  |     | SSC    |
| cuggguuCgaaucccagc                                                                                            | 1     | 1  |     | t11    |
| uuagagccagacugccuggguuu                                                                                       | 1     | 0  |     | ut2    |
| uuagagccagacugccuggguuu                                                                                       | 1     | 0  |     | hlc    |
| uuagagccagacugccuggguuuA                                                                                      | 1     | 1  |     | hlc    |
| uuagagccagacugccugg                                                                                           | 1     | 0  |     | mus    |
| uagagccagacugccuggguu                                                                                         | 1     | 0  |     | mus    |
| agccagaUugccugggu                                                                                             | 1     | 1  |     | Am2    |
| uuagagccagacugccuggguuu                                                                                       | 2     | 0  |     | te1    |
| uuagagccagacugccuggguuuU                                                                                      | 1     | 1  |     | te1    |
| uuagagccagacugccuggguuu                                                                                       | 2     | 0  |     | mm1    |
| uuagagccagacugccuggguuu                                                                                       | 2     | 0  |     | mm1    |
| uuagagccagacugccugg                                                                                           | 2     | 0  |     | em2    |

agaacagagccuggcaccacacacgggggacacacagagccagccuggcuaaguggaaaaggaacagggcuuuagagccagacugccuggguuuugaauccagccuguca

|                                       |    |   |     |
|---------------------------------------|----|---|-----|
| .....uuagagccagacugccugggu.....       | 1  | 0 | em2 |
| .....uuagagccagacugccuggguA.....      | 1  | 1 | em2 |
| .....uuagagccagacugccuggguuu.....     | 4  | 0 | em2 |
| .....uggguuCgaaucccagc.....           | 2  | 1 | em2 |
| .....uuagagccagacugccuggguuu.....     | 1  | 0 | bm2 |
| .....uuagagccagacugccuggguuu.....     | 1  | 0 | mE8 |
| .....cuggguuCgaaucccagc.....          | 2  | 1 | mE8 |
| .....uggguuCgaaucccagc.....           | 2  | 1 | mE8 |
| .....uuagagccagacugccuggguuu.....     | 3  | 0 | hl2 |
| .....uuagagccagacugccuggguuuU.....    | 1  | 1 | ut1 |
| .....cagggcuuuagagccagacugccuggg..... | 1  | 0 | br2 |
| .....uuuagagccagacugccugg.....        | 1  | 0 | br2 |
| .....uuagagccagacugccugU.....         | 1  | 1 | br2 |
| .....uuagagccagacugccuggg.....        | 1  | 0 | br2 |
| .....uuagagccagacugccugggu.....       | 1  | 0 | br2 |
| .....uuagagccagacugccuggAuu.....      | 1  | 1 | br2 |
| .....uuagagccagacugccuggguu.....      | 9  | 0 | br2 |
| .....uuagagccagacugccuggUuu.....      | 1  | 1 | br2 |
| .....uuagagccagacugccuggguuu.....     | 55 | 0 | br2 |
| .....uuagagccagacugccuggguuA.....     | 5  | 1 | br2 |
| .....uuagagccagacugccugggGuu.....     | 1  | 1 | br2 |
| .....uuagagccagacugccuggguuuU.....    | 6  | 1 | br2 |
| .....uuagagccagacugccuggguuuA.....    | 2  | 1 | br2 |
| .....uuagagccagacugccuggguuuga.....   | 3  | 0 | br2 |
| .....uuagagccagacugccuggguuuUa.....   | 1  | 1 | br2 |
| .....uuagagccagacugccuggguuuAaa.....  | 1  | 1 | br2 |
| .....uagagccagacugccuggguuu.....      | 2  | 0 | br2 |
| .....uagagccagacugccuggguuuugU.....   | 1  | 1 | br2 |
| .....uagagccagacugccuggguuuuga.....   | 1  | 0 | br2 |
| .....uuagagccagacugccuggguuu.....     | 1  | 0 | ay1 |
| .....uuagagccagacugccuggguuu.....     | 4  | 0 | ay1 |
| .....uagagccagacugccugg.....          | 1  | 0 | ay1 |
| .....uuagagccagacugccuggguuu.....     | 1  | 0 | ov2 |
| .....ccgagggcagccuggcuaagA.....       | 1  | 1 | hi2 |
| .....uuuagagccagacugccugg.....        | 1  | 0 | hi2 |
| .....uuuagagccagacugccugggA.....      | 1  | 1 | hi2 |
| .....uuuagagccagacugccugggu.....      | 1  | 0 | hi2 |
| .....uuagagccagacugccug.....          | 1  | 0 | hi2 |
| .....uuagagccagacugccugg.....         | 15 | 0 | hi2 |
| .....uuagagccagacugccugA.....         | 1  | 1 | hi2 |
| .....uuagagccagacugccuggg.....        | 2  | 0 | hi2 |
| .....uuagagccagacugccugggA.....       | 2  | 1 | hi2 |
| .....uuagagccagacugccugggu.....       | 27 | 0 | hi2 |
| .....uuagagccagacugccugggG.....       | 1  | 1 | hi2 |
| .....uuagagccagacugccuggguu.....      | 1  | 0 | hi2 |
| .....uuagagcUagacugccuggguuu.....     | 1  | 1 | hi2 |
| .....uuagagccagacugccuggguuu.....     | 52 | 0 | hi2 |
| .....uuagagccagacugccuggguuuA.....    | 1  | 1 | hi2 |
| .....uuagagccagacugccuggguuuU.....    | 4  | 1 | hi2 |
| .....uuagagccagacugccuggguuuuga.....  | 3  | 0 | hi2 |
| .....uagagccagacugccugg.....          | 1  | 0 | hi2 |
| .....uagagccagacugccugggu.....        | 1  | 0 | hi2 |
| .....uagagccagacugccuggguuu.....      | 1  | 0 | hi2 |
| .....uagagccagacugccuggguuuU.....     | 1  | 1 | hi2 |
| .....uuagagccagacugccugg.....         | 1  | 0 | Tm2 |
| .....uuagagccagacugccugggu.....       | 1  | 0 | Tm2 |
| .....uuagagccagacugccuggguuu.....     | 1  | 0 | em1 |
| .....uuagagccagacugccuggguuA.....     | 1  | 1 | mm2 |



agaacagagccuggcaccacaacacgggggacuaacacgagggcagccuggcuaaguggaaaaggaacaggcuuuagagccagacugccuggguuuugaaucccagccuguca

|                                      |    |   |     |
|--------------------------------------|----|---|-----|
| .....uuagagccagacugccuggguuu.....    | 9  | 0 | mm2 |
| .....uuagagccagacugccugggu.....      | 2  | 0 | br1 |
| .....uuagagccagacugccuggguuu.....    | 11 | 0 | br1 |
| .....uuagagccagacugccuggguuuA.....   | 1  | 1 | br1 |
| .....uagagccagacuUccuggguuu.....     | 1  | 1 | br1 |
| .....acugccuggguuuugaaucccag.....    | 1  | 0 | br1 |
| .....uuagagccagacugccuggguuu.....    | 1  | 0 | ay2 |
| .....uuagagccagacugccuggguuu.....    | 8  | 0 | ay2 |
| .....uuagagccagacugccuggguuuA.....   | 2  | 1 | ay2 |
| .....uuagagccagacugccuggguuuU.....   | 1  | 1 | ay2 |
| .....uagagccagacugccuggguuu.....     | 2  | 0 | ay2 |
| .....uuagagccagacugccuggguuuU.....   | 1  | 1 | hr2 |
| .....gcGagacugccuggguuu.....         | 1  | 1 | hr2 |
| .....aAgcuuuagagccagac.....          | 1  | 1 | hi1 |
| .....uuagagccagacugccugg.....        | 8  | 0 | hi1 |
| .....uuagagccGgacugccugg.....        | 1  | 1 | hi1 |
| .....uuagagccGgacugccugg.....        | 1  | 1 | hi1 |
| .....uuagagccagacugccugggu.....      | 15 | 0 | hi1 |
| .....uuagagUcagacugccugggu.....      | 1  | 1 | hi1 |
| .....uuagagccagacugccugggA.....      | 2  | 1 | hi1 |
| .....uuagagccagacugccugggu.....      | 3  | 0 | hi1 |
| .....uuagagccagacugccuggUuu.....     | 1  | 1 | hi1 |
| .....uuagagccaAacugccuggguuu.....    | 1  | 1 | hi1 |
| .....uuagagccagacugccuggguuu.....    | 40 | 0 | hi1 |
| .....uuagagccagacugccuggguuuA.....   | 1  | 1 | hi1 |
| .....uuagagccagacugccuggguuuU.....   | 4  | 1 | hi1 |
| .....uuagagccagacugccuggguuuA.....   | 1  | 1 | hi1 |
| .....uuagagccagacugccuggguuuuga..... | 1  | 0 | hi1 |
| .....uagagccagacugccugggu.....       | 1  | 0 | hi1 |
| .....uagagccagacugccuggguuu.....     | 1  | 0 | hi1 |
| .....uagagccagacugccugggUuu.....     | 1  | 1 | hi1 |
| .....uuagagccagacugccuggguuu.....    | 1  | 0 | Tp1 |
| .....uuagagccagacugccuggguuuU.....   | 1  | 1 | Tp1 |
| .....ccuggguuuugaUucccagc.....       | 1  | 1 | Tp1 |
| .....cugggCuugaaucccagc.....         | 1  | 1 | Tp1 |
| .....uuagagccagacugccugggu.....      | 1  | 0 | mE1 |
| .....uuagagccagacugccuggguuu.....    | 1  | 0 | mE1 |
| .....uuagagccagacugccuggguuuuga..... | 1  | 0 | mE1 |
| .....ccuggguuuCgaaucccagc.....       | 2  | 1 | mE1 |
| .....uggguuuCgaaucccagc.....         | 1  | 1 | mE1 |
| .....uuagagccagacugccuggguuu.....    | 7  | 0 | nb3 |
| .....uuagagccagacugccuggguuuU.....   | 1  | 1 | nb3 |
| .....uuagagccagacugccuggguuuA.....   | 1  | 1 | nb3 |
| .....uuagagccagacugccuggguuu.....    | 1  | 0 | mbm |
| .....uuagagccagacugccuggguuu.....    | 1  | 0 | oo1 |
| .....uuagaUccagacugccugggu.....      | 1  | 1 | li1 |
| .....uuagagccagacugccuggguuu.....    | 5  | 0 | li1 |
| .....uuagagccagacugccuggguuuU.....   | 3  | 1 | li1 |
| .....uuagagAcagacugccuggguuu.....    | 1  | 1 | li2 |
| .....uuagagccagacugccuggguuu.....    | 4  | 0 | li2 |
| .....uuagagccagacGgccuggguuu.....    | 1  | 1 | li2 |
| .....gccagacugccuggguuu.....         | 1  | 0 | li2 |
| .....uuagagccagacugccugggu.....      | 1  | 0 | Tm1 |
| .....uuagagccagacugccugggu.....      | 1  | 0 | Tm1 |
| .....uuagagccagacugccuggguuu.....    | 3  | 0 | em3 |
| .....uagagccagacugccuggguuu.....     | 1  | 0 | em3 |

agaacagagccuggcaccaaacacgggggacuaca**ccgagggcagccuggc**uuaguggaaaaggaacaggcuuu**agagccagacugccuggguuu**gaaucccagccuguca

|                                      |    |   |     |
|--------------------------------------|----|---|-----|
| .....g                               | 1  | 0 | em3 |
| .....uuagagccagacugccuggguuu.....    | 3  | 0 | nb2 |
| .....uuagagccagacugccuggguuA.....    | 1  | 1 | nb2 |
| .....uuagagccagacugccuggguuu.....    | 2  | 0 | mm3 |
| .....cuggguuGgaaucccagc.....         | 1  | 1 | mm3 |
| .....uuuagagccagacugccugg.....       | 1  | 0 | cx1 |
| .....uuuagagccagacugccugg.....       | 3  | 0 | cx1 |
| .....Cuagagccagacugccuggg.....       | 1  | 1 | cx1 |
| .....uuagagccagacugccugg.....        | 1  | 0 | cx1 |
| .....uuagagccagacugccugg.....        | 12 | 0 | cx1 |
| .....uuagagcAagacugccugggu.....      | 1  | 1 | cx1 |
| .....uuagagccagacugccCgggu.....      | 1  | 1 | cx1 |
| .....uuagagccagacugccugggA.....      | 1  | 1 | cx1 |
| .....uuagagccagacugccugggu.....      | 26 | 0 | cx1 |
| .....uuagagccagacugccuggguu.....     | 9  | 0 | cx1 |
| .....uuagagcGagacugccuggguuu.....    | 1  | 1 | cx1 |
| .....uuagagccagacugccuggguuu.....    | 54 | 0 | cx1 |
| .....uuagagccagacugcUuggguuu.....    | 1  | 1 | cx1 |
| .....uuagagccagacugccuggguuA.....    | 1  | 1 | cx1 |
| .....uuagagccagacugccuggguuuU.....   | 7  | 1 | cx1 |
| .....uuagagccagacugccuggguuug.....   | 2  | 0 | cx1 |
| .....uuagagccagacugccuggguuuA.....   | 2  | 1 | cx1 |
| .....uuagagccagacugccuggguuugU.....  | 1  | 1 | cx1 |
| .....uuagagccagacugccuggguuuuga..... | 1  | 0 | cx1 |
| .....uagagccagacugccugg.....         | 1  | 0 | cx1 |
| .....uagagccagacugccugggu.....       | 1  | 0 | cx1 |
| .....uUgagccagacugccuggguuu.....     | 1  | 1 | cx1 |
| .....agccagaUugccugggu.....          | 1  | 1 | Am1 |





gauaaaauauguacuuaggagacuuacgaaagaauagaagagcaagcugugucugggcuuguuucauuuguucgugacucugcuuuguaauaugggcugggacaga

|                                       |   |   |     |
|---------------------------------------|---|---|-----|
| .....uacgaaagaauagaagagcaagcugug..... | 1 | 0 | Tm2 |
| .....uuguuucauuuguucgugacu.....       | 1 | 0 | Tm2 |
| .....uguuucauuuguucgugacuc.....       | 1 | 0 | hi2 |
| .....cuuacgaaagaauagaagagcaa.....     | 1 | 0 | ntr |
| .....cuuacgaaagaauagaagagca.....      | 1 | 0 | c4t |
| .....cuuacgaaagaauagaagagcaag.....    | 1 | 0 | c4t |
| .....uguuucauuuguucgugacuc.....       | 1 | 0 | c4t |
| .....cuuacgaaagaauagaagagcaag.....    | 2 | 0 | pob |
| .....cuuacgaaagaauagaagagcaagc.....   | 1 | 0 | pob |
| .....uguuucauuuguucgugacuc.....       | 1 | 0 | pob |
| .....uuguuucauuuguucgugacu.....       | 1 | 0 | hi1 |
| .....cuuacgaaagaauagaagagca.....      | 1 | 0 | peb |
| .....cuuacgaaagaauagaagagcaa.....     | 2 | 0 | peb |
| .....cuuacgaaagaauagaagagca.....      | 1 | 0 | bac |
| .....cuuacgaaagaauagaagagcaag.....    | 1 | 0 | bac |
| .....uuguuucauuuguucgugacuc.....      | 1 | 0 | bac |
| .....uguuucauuuguucgugacuc.....       | 1 | 0 | bac |
| .....Aacuuacgaaagaauagaagagc.....     | 1 | 1 | nb3 |
| .....cuuacgaaagaauagaagagcaa.....     | 1 | 0 | mbm |
| .....cuuacgaaagaauagaagagcaagc.....   | 1 | 0 | sp1 |
| .....uuguuucauuuguucgugacuc.....      | 1 | 0 | sp1 |
| .....uguuucauuuguucgugacuc.....       | 1 | 0 | ool |
| .....uuguuucauuuguucgugacu.....       | 1 | 0 | li2 |
| .....cuuacgaaagaauagaagagca.....      | 2 | 0 | bm1 |
| .....cuuacgaaagaauagaagagcaa.....     | 1 | 0 | bm1 |
| .....cuuacgaaagaauagaagagcaa.....     | 1 | 0 | th2 |
| .....cuuacgaaagaauagaagagcaagc.....   | 1 | 0 | th2 |
| .....uuguuucauuuguucgugacuc.....      | 1 | 0 | Tm1 |
| .....uuguuucauuuguucgugacuc.....      | 3 | 0 | Tm1 |
| .....uguuucauuuguucgugacuc.....       | 2 | 0 | Tm1 |
| .....uuucauuuguucgugacuc.....         | 1 | 0 | mm3 |
| .....cuuacgaaagaauagaagagcaag.....    | 1 | 0 | th7 |
| .....cuuacgaaagaauagaagagcaagc.....   | 1 | 0 | th7 |
| .....uuguuucauuuguucgugacuc.....      | 1 | 0 | th7 |
| .....uuguuucauuuguucgugacuc.....      | 2 | 0 | cx1 |



guaccggccacggccgcuccuccgguggacuugacagcggggcga cucuggaucucugaucucgucggcugccagguucauguggaggcuccggggccgacgcgcguuc

|                                        |    |   |     |
|----------------------------------------|----|---|-----|
| .....cgguggacuugacagcggggcga.....      | 1  | 0 | bm2 |
| .....uccuccgguggacuugacagc.....        | 1  | 0 | mE8 |
| .....aucucugaucucgucggcugc.....        | 1  | 0 | je2 |
| .....gucggcugccagguucaugugg.....       | 1  | 0 | hi2 |
| .....cgguggacuugacagcggggcga.....      | 1  | 0 | Tm2 |
| .....cgguggacuugacagcggggcga.....      | 1  | 0 | ntr |
| .....cgguggacuugacagcggggcga.....      | 1  | 0 | ntl |
| .....cgguggacuugacagcggggcg.....       | 2  | 0 | c4t |
| .....gacuugacagcggggcgacu.....         | 1  | 0 | c4t |
| .....gucggcugccagguucaugugg.....       | 1  | 0 | hil |
| .....cgguggacuugacagcggggcga.....      | 7  | 0 | pob |
| .....uggCucucugaucucgucggcugc.....     | 1  | 1 | TP2 |
| .....cgguggacuugacagcggggcga.....      | 3  | 0 | peb |
| .....guggacuugacagcggggcga.....        | 1  | 0 | peb |
| .....ucggcugccagguucaugug.....         | 1  | 0 | peb |
| .....guggacuugacagcggggcgacu.....      | 1  | 0 | TP1 |
| .....uggaucucugaucucgucggcugc.....     | 1  | 0 | TP1 |
| .....uggaucucugaucucgucggcugcc.....    | 1  | 0 | TP1 |
| .....uggaucucugaucucgucggcugcca.....   | 1  | 0 | TP1 |
| .....ugccagguucauguggaggcucccggg.....  | 1  | 0 | TP1 |
| .....cggccgcuccccgguggacu.....         | 1  | 0 | bac |
| .....cccgguggacuugacagcgg.....         | 1  | 0 | bac |
| .....cgguggacuugacagcgggg.....         | 1  | 0 | bac |
| .....cgguggacuugacagcggggcga.....      | 1  | 0 | bac |
| .....cgguggacuugacagcggggc.....        | 1  | 0 | sp1 |
| .....cgguggacuugacagcggggcg.....       | 1  | 0 | sp1 |
| .....cgguggacuugacagcggggcga.....      | 7  | 0 | sp1 |
| .....ccagguucauguggaggcu.....          | 1  | 0 | sp1 |
| .....cgguggacuugacagcggggcga.....      | 1  | 0 | 3Ta |
| .....ucggcugccagguucauguggU.....       | 1  | 1 | 3Ta |
| .....gucggcugccagguucaugugg.....       | 2  | 0 | li1 |
| .....cucccgguggacuugacagcggggcgac..... | 1  | 0 | li2 |
| .....cgguggacuugacagcgggg.....         | 1  | 0 | imb |
| .....cgguggacuugacagcggggcga.....      | 3  | 0 | imb |
| .....guggacuugacagcggggcgacucugg.....  | 1  | 0 | imb |
| .....cccgguggacuugacagcggggcgacu.....  | 1  | 0 | th2 |
| .....cgguggacuugacagcgggg.....         | 2  | 0 | th2 |
| .....cgguggacuugacagcggggcg.....       | 4  | 0 | th2 |
| .....cgguggacuugacagcggggcga.....      | 12 | 0 | th2 |
| .....cgguggacuugacagcggggc.....        | 1  | 0 | Tm1 |
| .....cgcuccuccgguggacuugacagcgg.....   | 1  | 0 | th7 |
| .....cgguggacuugacagcggggcg.....       | 1  | 0 | th7 |
| .....cgguggacuugacagcggggcga.....      | 3  | 0 | th7 |
| .....ucggcugccagguucaugugg.....        | 1  | 0 | th7 |
| .....cgguggacuugacagcggggcga.....      | 1  | 0 | nct |
| .....gguggacuugacagcggggcgac.....      | 1  | 0 | nct |

mmu\_chr14\_30051\*

mmu\_chr14\_30051

guaccggccacggcgcuccucccgguggacuugacagcgggcgaucucuggaucucugaucucgucggcugccagguucauguggaggcuccgggcccagcgcgcuc



Provisional ID : chr15\_37558  
 Score total : 406.2  
 Score for star read(s) : 3.9  
 Score for read counts : 395.8  
 Score for mfe : 1.9  
 Score for randfold : 1.6  
 Score for cons. seed : 3  
 Total read count : 788  
 Mature read count : 785  
 Loop read count : 1  
 Star read count : 2



**Mature**

**Star**

| 5' -                                                                                                          | reads | mm | sample |
|---------------------------------------------------------------------------------------------------------------|-------|----|--------|
| ucuggaugggaaugaugucaucugggggcuugugugguagggggaauucugagcgagaccuaaacacacacgucuccaggucacuuuguuuacagccucgcacucacuc | 1     | 0  | nkc    |
| ucuggaugggaaugaugucaucugggggcuugugugguagggggaauucugagcgagaccuaaacacacacgucuccaggucacuuuguuuacagccucgcacucacuc | 1     | 0  | mdc    |
| ucuggaugggaaugaugucaucugggggcuugugugguagggggaauucugagcgagaccuaaacacacacgucuccaggucacuuuguuuacagccucgcacucacuc | 1     | 0  | CFU    |
| ucuggaugggaaugaugucaucugggggcuugugugguagggggaauucugagcgagaccuaaacacacacgucuccaggucacuuuguuuacagccucgcacucacuc | 3     | 0  | 48t    |
| ucuggaugggaaugaugucaucugggggcuugugugguagggggaauucugagcgagaccuaaacacacacgucuccaggucacuuuguuuacagccucgcacucacuc | 1     | 0  | 48t    |
| ucuggaugggaaugaugucaucugggggcuugugugguagggggaauucugagcgagaccuaaacacacacgucuccaggucacuuuguuuacagccucgcacucacuc | 1     | 0  | 48t    |
| ucuggaugggaaugaugucaucugggggcuugugugguagggggaauucugagcgagaccuaaacacacacgucuccaggucacuuuguuuacagccucgcacucacuc | 1     | 0  | mzb    |
| ucuggaugggaaugaugucaucugggggcuugugugguagggggaauucugagcgagaccuaaacacacacgucuccaggucacuuuguuuacagccucgcacucacuc | 1     | 0  | lun    |
| ucuggaugggaaugaugucaucugggggcuugugugguagggggaauucugagcgagaccuaaacacacacgucuccaggucacuuuguuuacagccucgcacucacuc | 1     | 0  | gcb    |
| ucuggaugggaaugaugucaucugggggcuugugugguagggggaauucugagcgagaccuaaacacacacgucuccaggucacuuuguuuacagccucgcacucacuc | 6     | 0  | gcb    |
| ucuggaugggaaugaugucaucugggggcuugugugguagggggaauucugagcgagaccuaaacacacacgucuccaggucacuuuguuuacagccucgcacucacuc | 17    | 0  | gcb    |
| ucuggaugggaaugaugucaucugggggcuugugugguagggggaauucugagcgagaccuaaacacacacgucuccaggucacuuuguuuacagccucgcacucacuc | 36    | 0  | gcb    |
| ucuggaugggaaugaugucaucugggggcuugugugguagggggaauucugagcgagaccuaaacacacacgucuccaggucacuuuguuuacagccucgcacucacuc | 76    | 0  | gcb    |
| ucuggaugggaaugaugucaucugggggcuugugugguagggggaauucugagcgagaccuaaacacacacgucuccaggucacuuuguuuacagccucgcacucacuc | 3     | 0  | gcb    |
| ucuggaugggaaugaugucaucugggggcuugugugguagggggaauucugagcgagaccuaaacacacacgucuccaggucacuuuguuuacagccucgcacucacuc | 1     | 0  | gcb    |
| ucuggaugggaaugaugucaucugggggcuugugugguagggggaauucugagcgagaccuaaacacacacgucuccaggucacuuuguuuacagccucgcacucacuc | 1     | 0  | gcb    |
| ucuggaugggaaugaugucaucugggggcuugugugguagggggaauucugagcgagaccuaaacacacacgucuccaggucacuuuguuuacagccucgcacucacuc | 1     | 1  | ut2    |
| ucuggaugggaaugaugucaucugggggcuugugugguagggggaauucugagcgagaccuaaacacacacgucuccaggucacuuuguuuacagccucgcacucacuc | 1     | 0  | hr1    |
| ucuggaugggaaugaugucaucugggggcuugugugguagggggaauucugagcgagaccuaaacacacacgucuccaggucacuuuguuuacagccucgcacucacuc | 1     | 0  | je1    |
| ucuggaugggaaugaugucaucugggggcuugugugguagggggaauucugagcgagaccuaaacacacacgucuccaggucacuuuguuuacagccucgcacucacuc | 1     | 1  | je1    |
| ucuggaugggaaugaugucaucugggggcuugugugguagggggaauucugagcgagaccuaaacacacacgucuccaggucacuuuguuuacagccucgcacucacuc | 2     | 0  | pcl    |
| ucuggaugggaaugaugucaucugggggcuugugugguagggggaauucugagcgagaccuaaacacacacgucuccaggucacuuuguuuacagccucgcacucacuc | 1     | 0  | pcl    |
| ucuggaugggaaugaugucaucugggggcuugugugguagggggaauucugagcgagaccuaaacacacacgucuccaggucacuuuguuuacagccucgcacucacuc | 1     | 0  | pcl    |

Mature

Star

ucuggaugggaaugaugucaucugggggcuugugugguaggggaaucugagcgagaccuaacacacacgucuccaggucacuuuguuucacagccucgcacucacuc

|                                   |    |   |     |
|-----------------------------------|----|---|-----|
| .....ucugggggcuugugugguag.....    | 2  | 0 | kdn |
| .....ucugggggcuugugugguagg.....   | 2  | 0 | kdn |
| .....ucugggggcuugugugguaggg.....  | 1  | 0 | kdn |
| .....caucugggggcuugugugguag.....  | 2  | 0 | gc2 |
| .....ucugggggcuugugugguua.....    | 15 | 0 | gc2 |
| .....ucugggggcuugugugguag.....    | 32 | 0 | gc2 |
| .....ucugggggcuugugugguagg.....   | 43 | 0 | gc2 |
| .....ucugggggcuugugugguaggg.....  | 46 | 0 | gc2 |
| .....ucugggggcuugugugguagggg..... | 1  | 0 | gc2 |
| .....ugggggcuugugugguaggg.....    | 2  | 0 | gc2 |
| .....ucugggggcuugugugguag.....    | 1  | 0 | sp2 |
| .....ucugggggcuugugugguagg.....   | 1  | 0 | sp2 |
| .....ucugggggcuugugugguaggg.....  | 6  | 0 | sp2 |
| .....ugggggcuugugugguaggg.....    | 1  | 0 | sp2 |
| .....ucaucugggggcuugugugguua..... | 1  | 0 | mus |
| .....ucugggggcuugugugguua.....    | 3  | 0 | mus |
| .....ucugggggcuugugugguag.....    | 2  | 0 | mus |
| .....ucugggggcuugugugguaggg.....  | 1  | 0 | mus |
| .....ucugggggcuugugugguag.....    | 1  | 0 | skn |
| .....ucugggggcuugugugguagg.....   | 1  | 0 | skn |
| .....ucugggggcuugugugguaggg.....  | 1  | 0 | skn |
| .....ucugggggcuugugugguua.....    | 4  | 0 | nt2 |
| .....ucugggggcuugugugguag.....    | 2  | 0 | nt2 |
| .....ucugggggcuugugugguagg.....   | 6  | 0 | nt2 |
| .....ucugggggcuugugugguaggg.....  | 1  | 0 | nt2 |
| .....cugggggcuugugugguaggg.....   | 1  | 0 | nt2 |
| .....ucugggggcuugugugguua.....    | 1  | 0 | itr |
| .....ucugggggcuugugugguag.....    | 9  | 0 | itr |
| .....ucugggggcuugugugguagg.....   | 10 | 0 | itr |
| .....ucugggggcuugugugguaggg.....  | 6  | 0 | itr |
| .....ucugggggcuugugugguagggg..... | 1  | 0 | itr |
| .....ucugggggcuugugugguagg.....   | 1  | 0 | bm2 |
| .....ucugggggcuugugugguua.....    | 7  | 0 | c8t |
| .....ucugggggcuugugugguag.....    | 19 | 0 | c8t |
| .....ucugggggcuugugugguagg.....   | 13 | 0 | c8t |
| .....ucugggggcuugugugguaggg.....  | 5  | 0 | c8t |
| .....ucugggggcuugugugguag.....    | 1  | 0 | li3 |
| .....ucugggggcuugugugguagg.....   | 2  | 0 | li3 |
| .....ucugggggcuugugugguaggU.....  | 1  | 1 | hi2 |
| .....ucugggggcuugugugguua.....    | 6  | 0 | ntr |
| .....ucugggggcuugugugguag.....    | 13 | 0 | ntr |
| .....ucugggggcuugugugguagg.....   | 13 | 0 | ntr |
| .....ucugggggcuugugugguaggg.....  | 8  | 0 | ntr |
| .....ucugggggcuugugugguag.....    | 2  | 0 | pan |
| .....ucugggggcuugugugguagg.....   | 3  | 0 | pan |
| .....ucugggggcuugugugguaggg.....  | 2  | 0 | pan |
| .....ucugggggcuugugugguag.....    | 1  | 0 | nt1 |
| .....ucugggggcuugugugguaggg.....  | 1  | 0 | nt1 |
| .....uaacacacacgucuccagguaU.....  | 1  | 1 | hr3 |
| .....ggaaucugagcgagacc.....       | 1  | 0 | ay2 |
| .....ucugggggcuugugugguua.....    | 9  | 0 | c4t |
| .....ucugggggcuugugugguag.....    | 9  | 0 | c4t |
| .....ucugggggcuugugugguagg.....   | 9  | 0 | c4t |

Mature

Star

|                                                                                                             |    |   |     |
|-------------------------------------------------------------------------------------------------------------|----|---|-----|
| ucuggaugggaaugaugucaucugggggcuugugugguaggggaaucugagcgagaccuaacacacacgucuccaggucacuuuguuucacagccucgcacucacuc |    |   |     |
| .....ucugggggcuugugugguaggg.....                                                                            | 6  | 0 | c4t |
| .....ucugggggcuugugugguagga.....                                                                            | 1  | 1 | tp2 |
| .....ucugggggcuuguguggua.....                                                                               | 5  | 0 | pob |
| .....ucugggggcuugugugguag.....                                                                              | 8  | 0 | pob |
| .....ucugggggcuugugugguaggg.....                                                                            | 20 | 0 | pob |
| .....ucugggggcuugugugguagggg.....                                                                           | 31 | 0 | pob |
| .....ugggggcuugugugguaggg.....                                                                              | 2  | 0 | pob |
| .....ucugggggcuuguguggua.....                                                                               | 2  | 0 | peb |
| .....ucugggggcuugugugguag.....                                                                              | 12 | 0 | peb |
| .....ucugggggcuugugugguaggg.....                                                                            | 20 | 0 | peb |
| .....ucugggggcuugugugguagggg.....                                                                           | 8  | 0 | peb |
| .....ucugggggcuugugugguagggg.....                                                                           | 1  | 0 | peb |
| .....ucugggggcuugugugguaggg.....                                                                            | 1  | 0 | tp1 |
| .....ucugggggcuuguguggua.....                                                                               | 1  | 0 | bac |
| .....ucugggggcuugugugguag.....                                                                              | 4  | 0 | bac |
| .....ucugggggcuugugugguaggg.....                                                                            | 1  | 0 | bac |
| .....ucugggggcuugugugguagggg.....                                                                           | 2  | 0 | bac |
| .....gcuugugugggaggggg.....                                                                                 | 1  | 1 | ool |
| .....ucugggggcuugugugguaggg.....                                                                            | 1  | 0 | 3Ta |
| .....ucugggggcuugugugguag.....                                                                              | 2  | 0 | sp1 |
| .....ucugggggcuugugugguaggg.....                                                                            | 1  | 0 | sp1 |
| .....ucugggggcuugugugguagggg.....                                                                           | 3  | 0 | sp1 |
| .....ucugggggcuugugugguagggg.....                                                                           | 1  | 1 | li2 |
| ucuggUugggaaugaug.....                                                                                      | 1  | 1 | li1 |
| .....ucugggggcuuguguggua.....                                                                               | 6  | 0 | imb |
| .....ucugggggcuugugugguag.....                                                                              | 5  | 0 | imb |
| .....ucugggggcuugugugguaggg.....                                                                            | 7  | 0 | imb |
| .....ucugggggcuugugugguagggg.....                                                                           | 10 | 0 | imb |
| .....ucugggggcuugugugguag.....                                                                              | 2  | 0 | bm1 |
| .....ucugggggcuuguguggua.....                                                                               | 6  | 0 | th2 |
| .....ucugggggcuugugugguag.....                                                                              | 11 | 0 | th2 |
| .....ucugggggcuugugugguaggg.....                                                                            | 11 | 0 | th2 |
| .....ucugggggcuugugugguagggg.....                                                                           | 7  | 0 | th2 |
| .....ucugggggcuuguguggua.....                                                                               | 1  | 0 | sg1 |
| .....ucugggggcuugugugguag.....                                                                              | 2  | 0 | sg1 |
| .....ucugggggcuugugugguaggg.....                                                                            | 6  | 0 | sg1 |
| .....ucugggggcuugugugguagggg.....                                                                           | 2  | 0 | sg1 |
| .....ucugggggcuugugugguag.....                                                                              | 4  | 0 | nt4 |
| .....ucugggggcuugugugguaggg.....                                                                            | 3  | 0 | nt4 |
| .....ucugggggcuugugugguagggg.....                                                                           | 7  | 0 | nt4 |
| .....ucugggggcuugugugguagggg.....                                                                           | 1  | 0 | nt4 |
| .....cuaacacacacgucuccaggua.....                                                                            | 1  | 0 | nt4 |
| .....ucugggggcuugugugguaggg.....                                                                            | 1  | 0 | mm3 |
| .....ucugggggcuugugugguagggg.....                                                                           | 4  | 0 | mm3 |
| .....ucugggggcuugugugguag.....                                                                              | 5  | 0 | th7 |
| .....ucugggggcuugugugguaggg.....                                                                            | 3  | 0 | th7 |
| .....ucugggggcuugugugguagggg.....                                                                           | 2  | 0 | th7 |
| .....ucugggggcuuguguggua.....                                                                               | 6  | 0 | nct |
| .....ucugggggcuugugugguag.....                                                                              | 24 | 0 | nct |
| .....ucugggggcuugugugguaggg.....                                                                            | 17 | 0 | nct |
| .....ucugggggcuugugugguagggg.....                                                                           | 10 | 0 | nct |



Mature

Star

|                                                                                                                |     |   |     |
|----------------------------------------------------------------------------------------------------------------|-----|---|-----|
| cauaagcucuggggcccgagggcaguaugaugggccucugauuaugucacuccggagauccggugcucacucugcccacagggccccugucuaaccucucugggcccucu |     |   |     |
| .....agggcaguaugaugggccucugauu.....                                                                            | 4   | 0 | mbm |
| .....ccggugcucacucugcccaca.....                                                                                | 1   | 0 | mbm |
| .....agggcaguaugaugggccuc.....                                                                                 | 1   | 0 | mus |
| .....agggcaguaugaugggccucugau.....                                                                             | 1   | 0 | mus |
| .....agggcaguaugaugggccucugauu.....                                                                            | 3   | 0 | mus |
| .....uccggugcucacucugcccaca.....                                                                               | 1   | 0 | mus |
| .....agggcaguaugaugggcc.....                                                                                   | 3   | 0 | nt2 |
| .....agggcaguaugaugggccucu.....                                                                                | 3   | 0 | nt2 |
| .....agggcaguaugaugggccucuga.....                                                                              | 1   | 0 | nt2 |
| .....agggcaguaugaugggccucugau.....                                                                             | 3   | 0 | nt2 |
| .....agggcaguaugaugggccucugauu.....                                                                            | 10  | 0 | nt2 |
| .....uccggugcucacucugcccac.....                                                                                | 1   | 0 | nt2 |
| .....uccggugcucacucugcccaca.....                                                                               | 1   | 0 | nt2 |
| .....agggcaguaugaugggccucugau.....                                                                             | 1   | 0 | li2 |
| .....uccggugcucacucugcccac.....                                                                                | 1   | 0 | li2 |
| .....agggcaguaugaugggccuc.....                                                                                 | 1   | 0 | bm1 |
| .....agggcaguaugaugggccucu.....                                                                                | 2   | 0 | bm1 |
| .....agggcaguaugaugggccucug.....                                                                               | 5   | 0 | bm1 |
| .....agggcaguaugaugggccucuga.....                                                                              | 42  | 0 | bm1 |
| .....agggcaguaugaugggccucugau.....                                                                             | 147 | 0 | bm1 |
| .....agggcaguaugaugggccucugauu.....                                                                            | 83  | 0 | bm1 |
| .....agggcaguaugaugggccucugauua.....                                                                           | 4   | 0 | bm1 |
| .....agggcaguaugaugggccucugauuau.....                                                                          | 4   | 0 | bm1 |
| .....uccggugcucacucugccc.....                                                                                  | 1   | 0 | bm1 |
| .....uccggugcucacucugcccaca.....                                                                               | 1   | 0 | bm1 |
| .....uccggugcucacucugccc.....                                                                                  | 1   | 0 | bm1 |
| .....uccggugcucacucugcccac.....                                                                                | 10  | 0 | bm1 |
| .....uccggugcucacucugcccaca.....                                                                               | 26  | 0 | bm1 |
| .....ccggugcucacucugcccac.....                                                                                 | 1   | 0 | bm1 |
| .....ccggugcucacucugcccaca.....                                                                                | 3   | 0 | bm1 |
| .....ccggugcucacucugcccac.....                                                                                 | 1   | 0 | bm1 |
| .....agggcaguaugaugggccucugauu.....                                                                            | 2   | 0 | imb |
| .....agggcaguaugaugggccucugauu.....                                                                            | 1   | 0 | sg1 |
| .....agggcaguaugaugggccucu.....                                                                                | 1   | 0 | bm2 |
| .....agggcaguaugaugggccucuga.....                                                                              | 5   | 0 | bm2 |
| .....agggcaguaugaugggccucugau.....                                                                             | 43  | 0 | bm2 |
| .....agggcaguaugaugggccucugauu.....                                                                            | 10  | 0 | bm2 |
| .....uccggugcucacucugcccaca.....                                                                               | 3   | 0 | bm2 |
| .....agggcaguaugaugggccucuga.....                                                                              | 1   | 0 | nt4 |
| .....agggcaguaugaugggccucugau.....                                                                             | 2   | 0 | nt4 |
| .....agggcaguaugaugggccucugauu.....                                                                            | 3   | 0 | nt4 |
| .....agggcaguaugaugggccucugau.....                                                                             | 1   | 0 | je2 |
| .....agggcaguaugaugggccucugauu.....                                                                            | 4   | 0 | c8t |



Star

Mature

|                                                                                                        |    |   |     |
|--------------------------------------------------------------------------------------------------------|----|---|-----|
| ccugcugucccucguccccagcgcugggccucugagcccgcgucgggucggcgucggggcugccagggcugggcccggaagcggcugcccgcccgcccgccg | 1  | 0 | t11 |
| .....ccagggcugggcccggaagcggcugcccgccg.....                                                             | 1  | 1 | ut2 |
| .....agggcugggcccggaagcggU.....                                                                        | 1  | 1 | ut2 |
| .....agggcugggcccggaagcggA.....                                                                        | 10 | 0 | pc1 |
| .....agggcugggcccggaagcggc.....                                                                        | 2  | 0 | pc1 |
| .....cgcuccgggucggccagggc.....                                                                         | 1  | 0 | kdn |
| .....agggcugggcccggaagcgg.....                                                                         | 1  | 0 | kdn |
| .....agggcugggcccggaagcggcu.....                                                                       | 1  | 0 | kdn |
| .....cccgcuucgggucggcg.....                                                                            | 1  | 0 | gc2 |
| .....cugccagggcuggAaccgg.....                                                                          | 1  | 1 | gc2 |
| .....agggcugggcccggaagcgg.....                                                                         | 1  | 0 | gc2 |
| .....agggcugggcccggaagcggc.....                                                                        | 1  | 0 | gc2 |
| .....agggcugggcccggaagcggc.....                                                                        | 1  | 0 | h1c |
| .....agggcugggcccggaagcgg.....                                                                         | 3  | 0 | sp2 |
| .....agggcugggcccggaagcggc.....                                                                        | 1  | 0 | sp2 |
| .....agggcugggcccggaagcgg.....                                                                         | 2  | 0 | skn |
| .....agggcugggcccggaagcgg.....                                                                         | 2  | 0 | nt2 |
| .....agggcugggcccggaagcggc.....                                                                        | 1  | 0 | nt2 |
| .....agggcugggcccggaagcggcu.....                                                                       | 1  | 0 | itr |
| .....gcagcgcugggccucugagccU.....                                                                       | 1  | 1 | em2 |
| .....gggcccucugagcccgcuucgggcu.....                                                                    | 1  | 0 | em2 |
| .....cccgcuucgggucggcg.....                                                                            | 1  | 0 | bm2 |
| .....agggcugggcccggaagcgg.....                                                                         | 3  | 0 | bm2 |
| .....agggcugggcccggaagcggc.....                                                                        | 2  | 0 | bm2 |
| .....cagggcugggcccggaagcggcu.....                                                                      | 1  | 0 | mE8 |
| .....cagggcugggcccggaagcggcu.....                                                                      | 1  | 1 | mE8 |
| .....agggcugggcccggaagc.....                                                                           | 1  | 0 | mE8 |
| .....agggcugggcccggaagc.....                                                                           | 2  | 0 | mE8 |
| .....agggcugggcccggaagc.....                                                                           | 1  | 0 | mE8 |
| .....agggcugggcccggaagcgg.....                                                                         | 4  | 0 | mE8 |
| .....agggcugggcccggaagcgg.....                                                                         | 1  | 1 | mE8 |
| .....gcugggcccggaagcggcugU.....                                                                        | 1  | 1 | mE8 |
| .....agggcugggcccggaagcgg.....                                                                         | 1  | 0 | h12 |
| .....cccgcuucgggucggcg.....                                                                            | 1  | 0 | ut1 |
| .....agggcugggcccggaagcggcA.....                                                                       | 1  | 1 | ut1 |
| .....ccagggcugggcccggaagcggcugccc.....                                                                 | 1  | 0 | Tm2 |
| .....agggcugggcccggaagcgg.....                                                                         | 4  | 0 | Tm2 |
| .....agggcugggcccggaagcggA.....                                                                        | 1  | 1 | Tm2 |
| .....agggcugggcccggaagcggU.....                                                                        | 1  | 1 | Tm2 |
| .....agggcugggcccggaagcggcA.....                                                                       | 1  | 1 | Tm2 |
| .....agggcugggcccggaagcggUu.....                                                                       | 1  | 1 | Tm2 |
| .....agggcugggcccggaagcggU.....                                                                        | 1  | 1 | hi2 |
| .....agggcugggcccggaagcggU.....                                                                        | 1  | 1 | hi2 |
| .....agggcugggcccggaagcggA.....                                                                        | 1  | 1 | hi2 |
| .....agggcugggcccggaagcggU.....                                                                        | 1  | 1 | ay2 |
| .....agggcugggcccggaagcgg.....                                                                         | 2  | 0 | c4t |
| .....gggcccucugagcccgcuucgggucggc.....                                                                 | 1  | 0 | Tp2 |
| .....cgcuucgggucggc.....                                                                               | 1  | 0 | Tp2 |
| .....agggcugggcccggaagcggA.....                                                                        | 1  | 1 | Tp2 |
| .....cagggcugggcccggaagcggcug.....                                                                     | 1  | 0 | pob |







Mature

Star

|                                                                                                                 |     |   |     |
|-----------------------------------------------------------------------------------------------------------------|-----|---|-----|
| cauaagcucuggggcccgagggcaguaugaugggccucugauuaugucacuccggagauccggugcucacucugcccacagggccccugucuaaccucucugggcccucuc |     |   |     |
| .....agggcaguaugaugggccucugauu.....                                                                             | 4   | 0 | mbm |
| .....ccggugcucacucugcccaca.....                                                                                 | 1   | 0 | mbm |
| .....agggcaguaugaugggccuc.....                                                                                  | 1   | 0 | mus |
| .....agggcaguaugaugggccucugau.....                                                                              | 1   | 0 | mus |
| .....agggcaguaugaugggccucugauu.....                                                                             | 3   | 0 | mus |
| .....uccggugcucacucugcccaca.....                                                                                | 1   | 0 | mus |
| .....agggcaguaugaugggcc.....                                                                                    | 3   | 0 | nt2 |
| .....agggcaguaugaugggccucu.....                                                                                 | 3   | 0 | nt2 |
| .....agggcaguaugaugggccucuga.....                                                                               | 1   | 0 | nt2 |
| .....agggcaguaugaugggccucugau.....                                                                              | 3   | 0 | nt2 |
| .....agggcaguaugaugggccucugauu.....                                                                             | 10  | 0 | nt2 |
| .....uccggugcucacucugcccac.....                                                                                 | 1   | 0 | nt2 |
| .....uccggugcucacucugcccaca.....                                                                                | 1   | 0 | nt2 |
| .....agggcaguaugaugggccucugau.....                                                                              | 1   | 0 | li2 |
| .....uccggugcucacucugcccac.....                                                                                 | 1   | 0 | li2 |
| .....agggcaguaugaugggccuc.....                                                                                  | 1   | 0 | bm1 |
| .....agggcaguaugaugggccucu.....                                                                                 | 2   | 0 | bm1 |
| .....agggcaguaugaugggccucug.....                                                                                | 5   | 0 | bm1 |
| .....agggcaguaugaugggccucuga.....                                                                               | 42  | 0 | bm1 |
| .....agggcaguaugaugggccucugau.....                                                                              | 147 | 0 | bm1 |
| .....agggcaguaugaugggccucugauu.....                                                                             | 83  | 0 | bm1 |
| .....agggcaguaugaugggccucugauua.....                                                                            | 4   | 0 | bm1 |
| .....agggcaguaugaugggccucugauuau.....                                                                           | 4   | 0 | bm1 |
| .....uccggugcucacucugccc.....                                                                                   | 1   | 0 | bm1 |
| .....uccggugcucacucugcccaca.....                                                                                | 1   | 0 | bm1 |
| .....uccggugcucacucugccc.....                                                                                   | 1   | 0 | bm1 |
| .....uccggugcucacucugcccac.....                                                                                 | 10  | 0 | bm1 |
| .....uccggugcucacucugcccaca.....                                                                                | 26  | 0 | bm1 |
| .....ccggugcucacucugcccac.....                                                                                  | 1   | 0 | bm1 |
| .....ccggugcucacucugcccaca.....                                                                                 | 3   | 0 | bm1 |
| .....cggugcucacucugcccac.....                                                                                   | 1   | 0 | bm1 |
| .....agggcaguaugaugggccucugauu.....                                                                             | 2   | 0 | imb |
| .....agggcaguaugaugggccucugauu.....                                                                             | 1   | 0 | sg1 |
| .....agggcaguaugaugggccucu.....                                                                                 | 1   | 0 | bm2 |
| .....agggcaguaugaugggccucuga.....                                                                               | 5   | 0 | bm2 |
| .....agggcaguaugaugggccucugau.....                                                                              | 43  | 0 | bm2 |
| .....agggcaguaugaugggccucugauu.....                                                                             | 10  | 0 | bm2 |
| .....uccggugcucacucugcccaca.....                                                                                | 3   | 0 | bm2 |
| .....agggcaguaugaugggccucuga.....                                                                               | 1   | 0 | nt4 |
| .....agggcaguaugaugggccucugau.....                                                                              | 2   | 0 | nt4 |
| .....agggcaguaugaugggccucugauu.....                                                                             | 3   | 0 | nt4 |
| .....agggcaguaugaugggccucugau.....                                                                              | 1   | 0 | je2 |
| .....agggcaguaugaugggccucugauu.....                                                                             | 4   | 0 | c8t |



Mature

Star

gaaaacuucguucaucucagacugggucucuuagguagccugaaggaagggggcuaccucaagagagccagucugagaugaacagacagguaccaaccucaaccggcu

|                                  |   |   |     |
|----------------------------------|---|---|-----|
| .....acugggucucuuagguagcc.....   | 1 | 0 | pob |
| .....acugggucucuuagguagcc.....   | 1 | 0 | hi1 |
| .....acugggucucuuagguagc.....    | 3 | 0 | Tp2 |
| .....acugggucucuuagguagcc.....   | 1 | 0 | Tp2 |
| .....acugggucucuuagguagU.....    | 1 | 1 | hr2 |
| .....acugggucucuuagguagcU.....   | 1 | 1 | hr2 |
| .....acugggucucuuagguagccu.....  | 1 | 0 | hr2 |
| .....acugggucucuuagguag.....     | 1 | 0 | kdn |
| .....agacugggucucuuagguagc.....  | 1 | 0 | Tp1 |
| .....acugggucucuuagguagc.....    | 1 | 0 | mE1 |
| .....acugggucucuuagguagc.....    | 1 | 0 | mbm |
| .....acugggucucuuagguagc.....    | 1 | 0 | sp1 |
| .....gggucucuuagguGgc.....       | 1 | 1 | Am2 |
| .....cuaccucaagagagccaguc.....   | 1 | 0 | li1 |
| .....caagagagccagucuga.....      | 1 | 0 | li1 |
| .....acugggucucuuagguagc.....    | 2 | 0 | itr |
| .....acugggucucuuagguagccu.....  | 1 | 0 | itr |
| .....uaccucaagagagccagucug.....  | 1 | 0 | th2 |
| .....acugggucucuuagguagc.....    | 1 | 0 | em2 |
| .....cuaccucaagagagccagucug..... | 2 | 0 | bm2 |
| .....gacugggucucuuagguag.....    | 1 | 0 | Tm1 |
| .....acugggucucuuagguag.....     | 1 | 0 | Tm1 |
| .....acugggucucuuagguag.....     | 2 | 0 | Tm1 |
| .....acugggucucuuagguagc.....    | 3 | 0 | Tm1 |
| .....acugggucucuuagguagU.....    | 1 | 1 | Tm1 |
| .....acugggucucuuagguag.....     | 1 | 0 | th7 |
| .....acugggucucuuagguagc.....    | 1 | 0 | th7 |
| .....acugggucucuuagguagcc.....   | 1 | 0 | th7 |
| .....cuaccucaagagagccaguc.....   | 2 | 0 | th7 |
| .....cuaccucaagagagccaguc.....   | 2 | 0 | th7 |
| .....cuaccucaagagagccagucug..... | 1 | 0 | th7 |
| .....uaccucaagagagccagucug.....  | 1 | 0 | th7 |
| .....uaccucaagagagccagucuga..... | 1 | 0 | th7 |
| .....uagUcugaaggaagggg.....      | 1 | 1 | ut1 |
| .....acugggucucuuagguagc.....    | 1 | 0 | nct |
| .....cuaccucaagagagccaguc.....   | 1 | 0 | nct |
| .....gggucucuuagguGgc.....       | 1 | 1 | Am1 |





Star

Mature

guccgaccacagcacuuaucacaaacucacuuguucauuccagugaacaagcaguuagguaugcagaaacugcuuguuacacuggaaauagguuaaggcugauggggggca

|                                       |    |   |     |
|---------------------------------------|----|---|-----|
| .....cugcuuguuacacuggaaauaggu.....    | 1  | 0 | mE8 |
| .....cugcuuguuacacuggaaauaggu.....    | 1  | 0 | hr3 |
| .....ucauuccagugaacaagca.....         | 1  | 0 | SSC |
| .....agugaacaagcaguucgguaug.....      | 1  | 0 | SSC |
| .....agugaacaagcaguucgguaugc.....     | 2  | 0 | SSC |
| .....aacugcuuguuacacuggaaau.....      | 2  | 0 | SSC |
| .....aacugcuuguuacacuggaaauU.....     | 2  | 1 | SSC |
| .....aacugcuuguuacacuggaaaua.....     | 1  | 0 | SSC |
| .....aacugcuuguuacacuggaaauag.....    | 7  | 0 | SSC |
| .....aacugcuuguuacacuggaaauagU.....   | 2  | 1 | SSC |
| .....acugcuuguuacacuggaaau.....       | 1  | 0 | SSC |
| .....acugcuuguuacacuggaaauU.....      | 3  | 1 | SSC |
| .....acugcuuguuacacuggaaauag.....     | 2  | 0 | SSC |
| .....acAgcuuguuacacuggaaauag.....     | 1  | 1 | SSC |
| .....acugcuuguuacacuggaaauagA.....    | 1  | 1 | SSC |
| .....acugcuuguuacacuggaaauaggg.....   | 1  | 1 | SSC |
| .....acugcuuguuacacuggaaauagU.....    | 4  | 1 | SSC |
| .....acugcuuguuacacuggaaauaggg.....   | 16 | 0 | SSC |
| .....cugcuuguuacacuggaaauag.....      | 1  | 0 | SSC |
| .....cugcuuguuUacuggaaauaggg.....     | 1  | 1 | SSC |
| .....cugcuuguuacacuggaaauaggg.....    | 1  | 1 | SSC |
| .....cugcuuguuacacuggaaauaggg.....    | 8  | 0 | SSC |
| .....cugcuuguuAacuggaaauaggg.....     | 1  | 1 | SSC |
| .....cugcuuguuacacuggaaauaggg.....    | 5  | 0 | SSC |
| .....cugcuuguuacacuggaaauaggguu.....  | 1  | 0 | SSC |
| .....Cuguuacacuggaaauaggg.....        | 1  | 1 | SSC |
| .....acugcuuguuacacuggaaauagU.....    | 1  | 1 | ay2 |
| .....cugcuuguuacacuggaaauaggg.....    | 1  | 0 | ay2 |
| .....ugcuuguuacacuggaaauaggg.....     | 1  | 0 | nb2 |
| .....acugcuuguuacacuggaaauagggAu..... | 1  | 1 | hr2 |
| .....cugcuuguuacacuggaaauaggg.....    | 1  | 0 | h1c |
| .....acugcuuguuacacuggaaauaggg.....   | 1  | 0 | nb3 |

miRBase precursor : mmu\_chr17\_15196  
 Total read count : 347  
 mmu\_chr17\_15196 read count : 100  
 mmu\_chr17\_15196\* read count : 18  
 remaining reads : 147

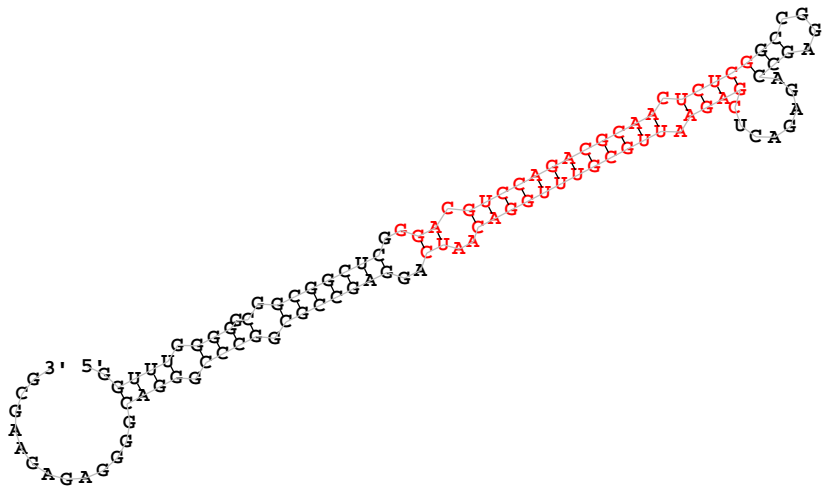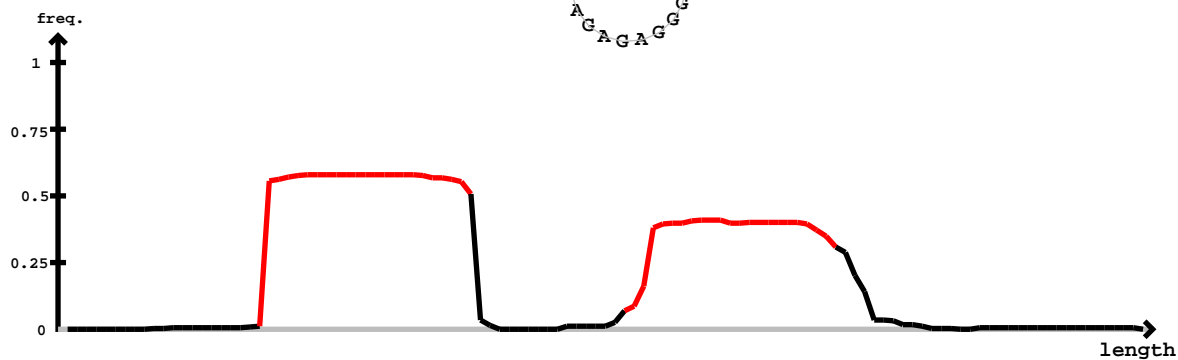

mmu\_chr17\_15196\*

mmu\_chr17\_15196

| 5' -                | mmu_chr17_15196        | -3'                                                 | exp | reads | mm | sample |
|---------------------|------------------------|-----------------------------------------------------|-----|-------|----|--------|
| gguuuggggcgccggcucg | ggacguccagacgcaacucucg | cgagaauugcguuuggacaaucaggagccgcgcccgaggaggagagaagcg |     |       |    |        |
| .....               | .....                  | .....                                               |     |       |    |        |
| .....               | ggacguccagacgcaacucucg | .....                                               |     | 4     | 0  | E15    |
| .....               | .....                  | .....                                               |     |       |    |        |
| .....               | .....                  | .....                                               |     | 3     | 1  | E15    |
| .....               | .....                  | .....                                               |     |       |    |        |
| .....               | ggacguccagacgcaacucuc  | .....                                               |     | 1     | 0  | nkc    |
| .....               | .....                  | ucgagaauugcguuuggaca                                |     | 1     | 0  | nkc    |
| .....               | .....                  | ucgagaauugcguuuggacaa                               |     | 1     | 0  | nkc    |
| .....               | .....                  | Aagaauugcguuuggacaauc                               |     | 2     | 1  | nkc    |
| .....               | .....                  | agaauugcguuuggacaauc                                |     | 2     | 0  | nkc    |
| .....               | .....                  | agaauugcguuuggacaaucagU                             |     | 1     | 0  | nkc    |
| .....               | .....                  | .....                                               |     |       |    |        |
| .....               | ggacguccagacgcaacucCcg | .....                                               |     | 1     | 1  | 3T3    |
| .....               | .....                  | .....                                               |     |       |    |        |
| .....               | ggacguccagacgcaacucucg | .....                                               |     | 1     | 0  | ay3    |
| .....               | .....                  | .....                                               |     |       |    |        |
| .....               | ggacguccagacgcaacucucg | .....                                               |     | 4     | 0  | mdc    |
| .....               | .....                  | cucgagaauugcguuuggaca                               |     | 1     | 0  | mdc    |
| .....               | .....                  | Aagaauugcguuuggacaauc                               |     | 1     | 1  | mdc    |
| .....               | .....                  | agaauugcguuuggacaauc                                |     | 1     | 0  | mdc    |
| .....               | .....                  | agaauugcguuuggacaauc                                |     | 1     | 0  | mdc    |
| .....               | .....                  | agaauugcguuuggacaaucagU                             |     | 1     | 1  | mdc    |
| .....               | .....                  | .....                                               |     |       |    |        |
| .....               | ggacguccagacgcaacucucg | .....                                               |     | 2     | 0  | 48t    |
| .....               | .....                  | Aagaauugcguuuggacaauc                               |     | 1     | 1  | 48t    |
| .....               | .....                  | agaauugcguuuggacaaucagU                             |     | 1     | 1  | 48t    |
| .....               | .....                  | .....                                               |     |       |    |        |
| .....               | ggacguccagacgcaacucucg | .....                                               |     | 2     | 0  | lun    |
| .....               | .....                  | agaauugcguuuggacaauc                                |     | 1     | 0  | lun    |
| .....               | .....                  | .....                                               |     |       |    |        |
| .....               | ggacguccagacgcaacucucg | .....                                               |     | 1     | 0  | mzb    |
| .....               | .....                  | cucgagaauugcguuuggac                                |     | 1     | 0  | mzb    |
| .....               | .....                  | .....                                               |     |       |    |        |
| .....               | ggcggcgccucUggacg      | .....                                               |     | 1     | 1  | SSC    |
| .....               | ggacgucUagacgcaacucucg | .....                                               |     | 1     | 1  | SSC    |
| .....               | ggacguccagacgcaacucucg | .....                                               |     | 9     | 0  | SSC    |



mmu\_chr17\_15196

gguuuggggcgccggcucggagcuccagacgcaacucucggccggagccagagacucgagaaugcguuuggacaauccaggagccggccgggacggggagagaagcg

|                                           |    |   |     |
|-------------------------------------------|----|---|-----|
| . . . . .gacguccagacgcaacucucgg. . . . .  | 1  | 0 | SSC |
| . . . . .acguccagacgcaacucucggc. . . . .  | 1  | 0 | SSC |
| . . . . .cgagaaugcguuuggacaauU. . . . .   | 1  | 1 | SSC |
| . . . . .ggaguccagacgcaacucuc. . . . .    | 1  | 0 | gcb |
| . . . . .ggaguccagacgcaacucucg. . . . .   | 4  | 0 | gcb |
| . . . . .ggaguccagacgcaacucucgg. . . . .  | 1  | 0 | gcb |
| . . . . .ggaguccagacgcaacucucg. . . . .   | 1  | 0 | hr1 |
| . . . . .ggaguccagacgcaacucu. . . . .     | 1  | 0 | ut2 |
| . . . . .ggaguccagacgcaacucuc. . . . .    | 1  | 0 | ut2 |
| . . . . .ggaguccagacgcaacucucg. . . . .   | 1  | 0 | ut2 |
| . . . . .agaauugcguuuggacaau. . . . .     | 1  | 0 | ut2 |
| . . . . .agaauugcguuuggacaauU. . . . .    | 1  | 1 | ut2 |
| . . . . .uuggacaauccaggagccg. . . . .     | 1  | 0 | ut2 |
| . . . . .ggaguccagacgcaacucucg. . . . .   | 7  | 0 | je1 |
| . . . . .ggaguccagacgcaaacucucg. . . . .  | 1  | 1 | je1 |
| . . . . .Aagaauugcguuuggacaauca. . . . .  | 1  | 1 | je1 |
| . . . . .ggaguccagacgcaacucucg. . . . .   | 2  | 0 | gc2 |
| . . . . .agaauugcguuuggacaauU. . . . .    | 1  | 0 | gc2 |
| . . . . .agaauugcguuuggacaauU. . . . .    | 2  | 1 | gc2 |
| . . . . .ggaguccagacgcaacucucg. . . . .   | 1  | 0 | kdn |
| . . . . .ggaguccagacgcaacucucg. . . . .   | 1  | 0 | pc1 |
| . . . . .ucgagaauugcguuuggaca. . . . .    | 2  | 0 | hlc |
| . . . . .ucgagaauugcguuuggacaau. . . . .  | 1  | 0 | hlc |
| . . . . .Aagaauugcguuuggacaauca. . . . .  | 1  | 1 | hlc |
| . . . . .agaauugcguuuggacaau. . . . .     | 2  | 1 | hlc |
| . . . . .ggaguccagacgcaacucucg. . . . .   | 1  | 0 | h11 |
| . . . . .cucgagaauugcguuuggacaau. . . . . | 1  | 0 | h11 |
| . . . . .ucgagaauugcguuuggaca. . . . .    | 1  | 1 | h11 |
| . . . . .ucgagaauugcguuuggaca. . . . .    | 1  | 0 | h11 |
| . . . . .agaauugcguuuggacaauca. . . . .   | 1  | 0 | h11 |
| . . . . .ggaguccagacgcaacucucg. . . . .   | 3  | 0 | sp2 |
| . . . . .ggaguccagacgcaacucucgg. . . . .  | 1  | 0 | sp2 |
| . . . . .agaauugcguuuggacaauU. . . . .    | 1  | 0 | sp2 |
| . . . . .agaauugcguuuggacaauU. . . . .    | 3  | 1 | sp2 |
| . . . . .agaauugcguuuggacaauU. . . . .    | 1  | 1 | mus |
| . . . . .agagacuGgagaauugc. . . . .       | 2  | 1 | Am2 |
| . . . . .gggacggggagUgaagc. . . . .       | 1  | 1 | Am2 |
| . . . . .ggaguccagacgcaacucuc. . . . .    | 1  | 0 | nt2 |
| . . . . .ggaguccagacgcaacucucg. . . . .   | 7  | 0 | nt2 |
| . . . . .agaauugcguuuggacaauU. . . . .    | 1  | 0 | nt2 |
| . . . . .agaauugcguuuggacaauU. . . . .    | 1  | 1 | nt2 |
| . . . . .gaaauugcguuuggacaauU. . . . .    | 1  | 0 | nt2 |
| . . . . .ggaguccagacgcaacucuc. . . . .    | 1  | 0 | skn |
| . . . . .agaauugcguuuggacaauU. . . . .    | 1  | 1 | skn |
| . . . . .ggaguccagacgcaacucucg. . . . .   | 1  | 0 | itr |
| . . . . .cguccagacgcaacucucggc. . . . .   | 1  | 0 | itr |
| . . . . .agaauugcguuuggacaauU. . . . .    | 1  | 0 | itr |
| . . . . .agaauugcguuuggacaauU. . . . .    | 1  | 1 | em2 |
| . . . . .gggaguccagacgcaacucucg. . . . .  | 1  | 0 | bm2 |
| . . . . .ggaguccagacgcaacucu. . . . .     | 1  | 0 | bm2 |
| . . . . .ggaguccagacgcaacucuc. . . . .    | 2  | 0 | bm2 |
| . . . . .ggaguccagacgcaacucucg. . . . .   | 11 | 0 | bm2 |

mmu\_chr17\_15196

gguuuggggcgccggcucggagcuccagagacgagaaugcguuuggacaaucaggagccggccgggacggggagagaagcg

|                                      |   |   |     |
|--------------------------------------|---|---|-----|
| .....Agaauugcguuuggacaa.....         | 1 | 1 | bm2 |
| .....Agaauugcguuuggacaauc.....       | 1 | 1 | bm2 |
| .....ggaguccagagcgaacucuc.....       | 1 | 0 | h12 |
| .....ggaguccagagcgaacucucg.....      | 6 | 0 | h12 |
| .....ucgagaauugcguuuggaca.....       | 1 | 0 | h12 |
| .....cgagaauugcguuuggacaaucU.....    | 1 | 1 | h12 |
| .....agaauugcguuuggacaauc.....       | 1 | 0 | h12 |
| .....ggaguccagagcgaacucuc.....       | 1 | 0 | je2 |
| .....ggaguccagaAgcaacucucg.....      | 1 | 1 | je2 |
| .....ggaguccagagcgaacucucg.....      | 6 | 0 | je2 |
| .....ggaguccagagcgaacucucgU.....     | 1 | 1 | je2 |
| .....Agaauugcguuuggacaauc.....       | 1 | 1 | je2 |
| .....agaauugcguuuggacaauc.....       | 1 | 0 | je2 |
| .....agaauugcguuuggacaaucagU.....    | 1 | 1 | ut1 |
| .....ggaguccagagcgaacucuc.....       | 1 | 0 | c8t |
| .....ggaguccagagcgaacucucg.....      | 2 | 0 | c8t |
| .....cguccagagcgaacucucggc.....      | 1 | 0 | c8t |
| .....gaguccagagcgaacucucg.....       | 1 | 0 | br2 |
| .....ggaguccagagcgaacucucg.....      | 2 | 0 | hi2 |
| .....Agaauugcguuuggacaauc.....       | 1 | 1 | hi2 |
| .....ggaguccagagcgaacucucg.....      | 1 | 1 | Tm2 |
| .....ggaguccagagcgaacucucg.....      | 1 | 0 | Tm2 |
| .....acguccagagcgaacucucggc.....     | 1 | 0 | Tm2 |
| .....ggaguccagagcgaac.....           | 1 | 0 | ntr |
| .....ggaguccagagcgaacucucg.....      | 2 | 0 | ntr |
| .....ggaguccagagcgaacuc.....         | 1 | 0 | pan |
| .....agaauugcguuuggacaaucagU.....    | 1 | 1 | nt1 |
| .....agaauugcguuuggacaaucagU.....    | 1 | 1 | ay2 |
| .....cggcggcucgggaguccagagcga.....   | 1 | 0 | c4t |
| .....ggaguccagagcgaac.....           | 1 | 0 | c4t |
| .....ggaguccagagcgaacucucg.....      | 5 | 0 | c4t |
| .....ucgagaauugcguuuggacaa.....      | 1 | 0 | c4t |
| .....Agaauugcguuuggacaauc.....       | 1 | 1 | c4t |
| .....Agaauugcguuuggacaaucag.....     | 2 | 1 | c4t |
| .....agaauugcguuuggacaauc.....       | 1 | 0 | c4t |
| .....agaauugcguuuggacaauc.....       | 2 | 0 | c4t |
| .....agaauugcguuuggacaaucag.....     | 3 | 0 | c4t |
| .....agaauugcguuuggacaaucagU.....    | 2 | 1 | c4t |
| .....cUggaguccagagcgaacucucggc.....  | 1 | 1 | Tp2 |
| .....ggaguccagagcgaacucucg.....      | 1 | 0 | Tp2 |
| .....ggaguccagagcgaacucucgA.....     | 1 | 1 | Tp2 |
| .....agaauugcguuuggacaaucagU.....    | 2 | 1 | Tp2 |
| .....agaauugcguuuggacaaucaggagc..... | 1 | 0 | Tp2 |
| .....uugcguuuggacaaucaggagccgc.....  | 2 | 0 | Tp2 |
| .....ggaguccagagcgaacucuc.....       | 1 | 0 | pob |
| .....ggaguccagagcgaacucucg.....      | 6 | 0 | pob |
| .....ucgagaauugcguuuggaca.....       | 1 | 0 | pob |
| .....agaauugcguuuggacaaucag.....     | 2 | 0 | pob |
| .....agaauugcguuuggacaaucagU.....    | 3 | 1 | pob |
| .....ggaguccagagcgaacucucg.....      | 1 | 1 | hi1 |
| .....ggaguccagaAgcaacucucg.....      | 1 | 1 | hi1 |
| .....ggaguccagagcgaacucucg.....      | 2 | 0 | hi1 |
| .....ggaUguccagagcgaacucucgg.....    | 1 | 1 | hi1 |
| .....ggaguccagagcgaacucucg.....      | 1 | 0 | peb |

gguuugggggcgccggcucggagcuccagacgcaacucucggccggagccagagacucgagaauugcguuuggacaauccaggagccgcccgggacggggagagaagcg

|                                       |    |   |     |
|---------------------------------------|----|---|-----|
| .....agaaugcguuuggacaauucagU.....     | 1  | 1 | peb |
| .....ggacguccagacgcaacucucg.....      | 1  | 0 | Tp1 |
| .....gaaugcguuuggacaauccaggagc.....   | 4  | 0 | Tp1 |
| .....aaugcguuuggacaauccaggagccg.....  | 1  | 0 | Tp1 |
| .....uugcguuuggacaauccaggagccgc.....  | 1  | 0 | Tp1 |
| .....ugcguuuggacaauccaggagccgccc..... | 1  | 0 | Tp1 |
| .....ggacguccagacgcaacucucg.....      | 2  | 0 | bac |
| .....cucgagaauugcguuuggac.....        | 1  | 0 | bac |
| .....ucgagaauugcguuuggacaa.....       | 1  | 0 | bac |
| .....Aagaauugcguuuggacaaucc.....      | 1  | 1 | bac |
| .....agaauugcguuuggacaauca.....       | 1  | 0 | bac |
| .....agaauugcguuuggacaauucagU.....    | 1  | 1 | bac |
| .....agaauugcguuuggacaauccagg.....    | 1  | 0 | bac |
| .....ggacguccagacgcaacucucg.....      | 1  | 0 | mE1 |
| .....guccagacgcaacucucg.....          | 1  | 0 | mE1 |
| .....ggacguccagacgcaacucuc.....       | 1  | 0 | mbm |
| .....ggacguccagacgcaacucucg.....      | 3  | 0 | mbm |
| .....agaauugcguuuggacaauca.....       | 1  | 0 | mbm |
| .....agaauugcguuuggacaauucagU.....    | 1  | 1 | mbm |
| .....ggacguccagacgcaacucucg.....      | 2  | 0 | 3Ta |
| .....ucgagaauugcguuuggacaa.....       | 1  | 0 | 3Ta |
| .....agaauugcguuuggacaauucagU.....    | 3  | 1 | 3Ta |
| .....ggacguccagacgcaacucucg.....      | 3  | 0 | sp1 |
| .....ucgagaauugcguuuggaca.....        | 1  | 0 | sp1 |
| .....cgagaauugcguuuggacaau.....       | 3  | 0 | sp1 |
| .....gagaauugcguuuggacaau.....        | 2  | 0 | sp1 |
| .....Aagaauugcguuuggacaau.....        | 1  | 1 | sp1 |
| .....Aagaauugcguuuggacaauucag.....    | 1  | 1 | sp1 |
| .....agaauugcguuuggacaauca.....       | 3  | 0 | sp1 |
| .....agaauugcguuuggacaauucag.....     | 1  | 0 | sp1 |
| .....agaauugcguuuggacaauucagU.....    | 3  | 1 | sp1 |
| .....ggacguccagacgcaacucucg.....      | 1  | 0 | li1 |
| .....ggacguccagacgcaacucucg.....      | 1  | 0 | imb |
| .....Aagaauugcguuuggacaauca.....      | 1  | 1 | imb |
| .....Aagaauugcguuuggacaauucag.....    | 1  | 1 | imb |
| .....ggacguccagacgcaacucu.....        | 1  | 0 | bm1 |
| .....ggacguccagacgcaacucuc.....       | 3  | 0 | bm1 |
| .....ggacguccagacgcaacucucg.....      | 6  | 0 | bm1 |
| .....Aagaauugcguuuggacaauca.....      | 1  | 1 | bm1 |
| .....agaauugcguuuggacaauca.....       | 2  | 0 | bm1 |
| .....ggacguccagacgcaacucucg.....      | 1  | 0 | sg1 |
| .....ucgagaauugcguuuggacaa.....       | 1  | 0 | sg1 |
| .....Aagaauugcguuuggacaauca.....      | 1  | 1 | sg1 |
| .....ggacguccagacgcaacuc.....         | 1  | 0 | th2 |
| .....ggacguccagacgcaacucuc.....       | 1  | 0 | th2 |
| .....ggacguccagacgcaacucucg.....      | 7  | 0 | th2 |
| .....cgagaauugcguuuggacaauca.....     | 1  | 0 | th2 |
| .....Aagaauugcguuuggacaau.....        | 1  | 1 | th2 |
| .....agaauugcguuuggacaauucag.....     | 1  | 0 | th2 |
| .....agaauugcguuuggacaauucagU.....    | 1  | 1 | th2 |
| .....ggacguccagacgcaacucucg.....      | 1  | 0 | nt4 |
| .....ucgagaauugcguuuggacaa.....       | 1  | 0 | nt4 |
| .....ggacguccagacgcaacucucg.....      | 16 | 0 | Tm1 |
| .....acguccagacgcaacucucgg.....       | 1  | 0 | Tm1 |
| .....Aagaauugcguuuggacaau.....        | 1  | 1 | Tm1 |
| .....agaauugcguuUgacaauccagg.....     | 1  | 1 | Tm1 |

gguuuggggcgcgccgucgggacguccagacgcaacucucggccggagccagagacucgagaaugcguuuggacaauccaggagccgcccgggacggggagagaagcg

|                                     |   |   |     |
|-------------------------------------|---|---|-----|
| .....agaaugcguuuggacaauccaggaa..... | 1 | 1 | em3 |
| .....ggacguccagacgcaacucucg.....    | 5 | 0 | th7 |
| .....cucgagaaugcguuuggaca.....      | 1 | 0 | th7 |
| .....Aagaauugcguuuggacaaucc.....    | 1 | 1 | th7 |
| .....agaaugcguuuggacaauca.....      | 1 | 0 | th7 |
| .....agaaugcguuuggacaauccag.....    | 2 | 0 | th7 |
| .....ggacguccagacgcaacucucg.....    | 3 | 0 | cx1 |
| .....uccagacgcaacucucg.....         | 1 | 0 | cx1 |
| .....Aagaauugcguuuggacaauccag.....  | 1 | 1 | cx1 |
| .....ggacguccagacgcaac.....         | 1 | 0 | nct |
| .....ggacguccagacgcaacucucg.....    | 3 | 0 | nct |
| .....agaaugcguuuggacaauccag.....    | 1 | 0 | nct |
| .....agagacuGgagaauugc.....         | 2 | 1 | Am1 |
| .....gggacggggagUgaagc.....         | 1 | 1 | Am1 |



gagccaucucucagccccugauauacuuaauaugcuucaggacugcagagauggcacug

|                               |    |   |     |
|-------------------------------|----|---|-----|
| .....aggacugcagagauggcU..     | 2  | 1 | SSC |
| .....aggacugcagagauggcac..    | 1  | 0 | SSC |
| .....aggacugcagagauggcacu.    | 1  | 0 | SSC |
| .....aggacugcagagauggcacug    | 2  | 0 | SSC |
| .....aggacugcagagauggAa..     | 1  | 1 | gcb |
| .....aggacugcagagauggcac..    | 1  | 0 | gcb |
| .....aggacugcagagauggcacu.    | 7  | 0 | gcb |
| .....aggacugcagagauggcacA.    | 1  | 1 | gcb |
| .....aggacugcagagauggcacug    | 32 | 0 | gcb |
| gagccaucucucagccccuga.....    | 3  | 0 | t11 |
| gCgccaucucucagccccuga.....    | 1  | 1 | t11 |
| gagccaucucucagccccugaA.....   | 2  | 1 | t11 |
| gagccaucucucagccccugaAa.....  | 3  | 1 | t11 |
| gagccaucucucagccccugaAau..... | 1  | 1 | ut2 |
| .....uucaggacugcagagaugg..... | 1  | 0 | ut2 |
| .....aggacugcagagauggcacug    | 1  | 0 | ut2 |
| .....aggacugcagagauggcacug    | 2  | 0 | je1 |
| .....aggacugcagagauggcacug    | 2  | 0 | kdn |
| .....uucaggacugcagagauggca..  | 1  | 0 | gc2 |
| .....ucaggacugcagagauggcacu.  | 1  | 0 | gc2 |
| .....aggacugcagagauggca..     | 1  | 0 | gc2 |
| .....aggacugcagagauggcac..    | 2  | 0 | gc2 |
| .....aggacugcagagauggcacu.    | 16 | 0 | gc2 |
| .....aggacugcagagauggcacug    | 22 | 0 | gc2 |
| .....gggacugcagagauggcacug    | 1  | 0 | gc2 |
| gagccaucucucagccccugaAa.....  | 1  | 1 | pcl |
| .....aggacugcagagauggca..     | 2  | 0 | pcl |
| .....aggacugcagagauggcacug    | 3  | 0 | pcl |
| .....aggacugcagagauggcac..    | 1  | 0 | hlc |
| .....aggacugcagagauggcacug    | 2  | 0 | hlc |
| .....aggacugGagagauggc.....   | 1  | 1 | h11 |
| .....aggacugcagagauggcacug    | 1  | 0 | h11 |
| .....gggacugGagagauggca..     | 1  | 1 | h11 |
| gagccaucucucGgccccuga.....    | 1  | 1 | sp2 |
| gagccaucucucagccccugaAa.....  | 1  | 1 | sp2 |
| .....aggacugcagagauggca..     | 1  | 0 | sp2 |
| .....aggacugcagagauggAa..     | 1  | 1 | sp2 |
| .....aggacugcagagauggcac..    | 1  | 0 | sp2 |
| .....aggacugcagagauggcacu.    | 14 | 0 | sp2 |
| .....aggacugcagagauggcacug    | 33 | 0 | sp2 |
| .....aggacugcagagauggcacu.    | 3  | 0 | mus |
| gagccaucucucCagcc.....        | 3  | 1 | Am2 |
| gagccaucucucCagccccu.....     | 1  | 1 | Am2 |
| .agccaucucucagcccU.....       | 1  | 1 | Am2 |
| .....aggacugGagagaugg.....    | 1  | 1 | Am2 |
| .....aggacugcagagauggcacu.    | 1  | 0 | Am2 |
| .....aggacugcagagauggcacA.    | 1  | 1 | Am2 |
| .....aggacugcagagauggcacu.    | 8  | 0 | nt2 |
| .....aggacugcagagauggcacug    | 3  | 0 | nt2 |
| .....uucaggacugcagagauggca..  | 1  | 0 | skn |
| .....aggacugcagagauggca..     | 1  | 0 | skn |
| .....aggacugcagagauggcacu.    | 2  | 0 | skn |
| .....aggacugcagagauggcacug    | 2  | 0 | skn |
| .....aggacugcagagauggcacu.    | 6  | 0 | itr |

gagccaucucucagccccgauauacuuaauaugcuucagggacugcagagauggcacug

|                                 |    |   |     |
|---------------------------------|----|---|-----|
| .....agggacugcagagauggcacug     | 10 | 0 | itr |
| .....agggacugcagagauggcacug     | 6  | 0 | bm2 |
| .agccaucucucagccGc.....         | 1  | 1 | mE8 |
| ....caucucucagcccuU.....        | 1  | 1 | mE8 |
| ....caucucucagcccuUa.....       | 1  | 1 | mE8 |
| .....agggacugcagagauggcacu.     | 1  | 0 | hl2 |
| .....agggacugcagagauggcacug     | 2  | 0 | hl2 |
| .....gggacugGagagauggca...      | 1  | 1 | hl2 |
| gagccaucucucagccccuga.....      | 1  | 0 | je2 |
| .....agggacugcagagauggcacug     | 1  | 0 | je2 |
| .....agggacugcagagauggcacug     | 2  | 0 | ut1 |
| gagccaucucucagccccgauU.....     | 1  | 1 | c8t |
| .....agggacugcagagauggcacu.     | 18 | 0 | c8t |
| .....agggacugcagagauggcacug     | 14 | 0 | c8t |
| .....gggacugcagagauggcacug      | 1  | 0 | c8t |
| .....agggacugcagagauggcacu.     | 1  | 0 | li3 |
| .....agggacugcagagauggcacug     | 1  | 0 | li3 |
| .....agggacugGagagaugg.....     | 3  | 1 | Tm2 |
| .....agggacugAagagaugg.....     | 1  | 1 | Tm2 |
| .....agggacugcagagauggcacug     | 4  | 0 | Tm2 |
| .....gggacugGagagauggca...      | 1  | 1 | Tm2 |
| gagccaucucucCagcc.....          | 1  | 1 | hi2 |
| gagccaucucucagccccuga.....      | 1  | 0 | hi2 |
| gagccaucucucagccccuga.....      | 1  | 0 | em1 |
| .....agggacugcagagauggcacu.     | 5  | 0 | ntr |
| .....agggacugcagagauggcacug     | 10 | 0 | ntr |
| .....agggacugcagagauggcacug     | 2  | 0 | pan |
| .....agggacugcagagauggcacu.     | 2  | 0 | nt1 |
| gagccaucucucagccccgau.....      | 1  | 0 | hr3 |
| gagccaucucucagccccgaAau.....    | 1  | 1 | hr3 |
| .....cuucagggacugcagagauggcacu. | 1  | 0 | c4t |
| .....agggacugcagagauggca...     | 1  | 0 | c4t |
| .....agggacugcagagauggcac..     | 1  | 0 | c4t |
| .....agggacugcagagauggcacu.     | 8  | 0 | c4t |
| .....agggacugcagagauggcacug     | 14 | 0 | c4t |
| .....gggacugcagagauggcacug      | 1  | 0 | c4t |
| .....agggacugcagagauggcacug     | 7  | 0 | pob |
| .....agggacugGagagaugg.....     | 1  | 1 | Tp2 |
| .....agggacugcagagauggcac..     | 1  | 0 | Tp2 |
| .....agggacugcagagauggcacu.     | 2  | 0 | Tp2 |
| .....agggacugcagagauggcacug     | 5  | 0 | Tp2 |
| .....gggacugGagagauggc...       | 2  | 1 | Tp2 |
| gagccaucucucagccccuga.....      | 1  | 0 | hi1 |
| .....agggacugcagagauggcacug     | 1  | 0 | peb |
| .....agggacugcagagauggcacug     | 2  | 0 | te2 |
| .....agggacugcagagauggcUcug     | 1  | 1 | te2 |
| .....ugcuucagggacugGagag.....   | 1  | 1 | Tp1 |
| .....agggacugcagagauggcacu.     | 2  | 0 | Tp1 |

gagccaucucucagccccugauauacuuaauaugcuucaggacugcagagauggcacug

|                                |    |   |     |
|--------------------------------|----|---|-----|
| .....aggacugcagagauggcacug     | 8  | 0 | Tp1 |
| .....ggacugGagagauggc....      | 5  | 1 | Tp1 |
| .....aggacugcagagauggcacu.     | 5  | 0 | bac |
| .....aggacugcagagauggcacug     | 10 | 0 | bac |
| .....ggacugcagagauggcacug      | 1  | 0 | bac |
| gagccaucucucagccccuga.....     | 4  | 0 | mE1 |
| gagccaucucucagccAcuga.....     | 1  | 1 | mE1 |
| gagccaucucucagccccugaA.....    | 3  | 1 | mE1 |
| .....aggacugcagagauggcac...    | 3  | 0 | sp1 |
| .....aggacugcagagauggcacu.     | 8  | 0 | sp1 |
| .....aggacugcagagauggcacug     | 37 | 0 | sp1 |
| .....ggacugcagagauggcacug      | 1  | 0 | sp1 |
| gagccaucucucagccccuga.....     | 2  | 0 | 3Ta |
| gagccaucucucCagccc.....        | 2  | 1 | li1 |
| .....aggacugcagagauggcacug     | 1  | 0 | li1 |
| .....Aggacugcagagauggc....     | 1  | 1 | li1 |
| .....ggacugGagagauggc....      | 1  | 1 | li1 |
| gagccaucucucCagcc.....         | 1  | 1 | li2 |
| gagccaucucucCagccc.....        | 1  | 1 | li2 |
| gagccaucucucagccccugauauC..... | 2  | 1 | pgr |
| .agccaucucucagccccugauC.....   | 1  | 1 | pgr |
| .....aggacugcagagauggcacu.     | 1  | 0 | bml |
| .....aggacugcagagauggcacug     | 2  | 0 | bml |
| gagccaucucucagccccugaAa.....   | 1  | 1 | imb |
| .....aggacugcagagauggcac...    | 1  | 0 | imb |
| .....aggacugcagagauggcacu.     | 1  | 0 | imb |
| .....aggacugcagagauggcacug     | 14 | 0 | imb |
| .....aggacugcagagauggcacu.     | 5  | 0 | sg1 |
| .....aggacugcagagauggcacug     | 4  | 0 | sg1 |
| .....aggacugcagagauggcac...    | 1  | 0 | th2 |
| .....aggacugcagagauggcac..     | 1  | 0 | th2 |
| .....aggacugcagagauggcacu.     | 5  | 0 | th2 |
| .....aggacugcagagauggcacug     | 7  | 0 | th2 |
| .....aggacugGagagaugg....      | 3  | 1 | Tm1 |
| .....aggacugcagagauggcacu.     | 1  | 0 | Tm1 |
| .....aggacugcagagauggcacug     | 4  | 0 | Tm1 |
| .....ggacugAagagauggc....      | 1  | 1 | Tm1 |
| .....ggacugGagagauggc....      | 2  | 1 | Tm1 |
| .....ggacugcagagauggcU...      | 1  | 1 | Tm1 |
| gagccaucucucagccccugaAa.....   | 1  | 1 | nt4 |
| .....aggacugcagagauggcacu.     | 1  | 0 | nt4 |
| .....aggacugcagagauggcacug     | 1  | 0 | nt4 |
| .....ucaggacugcagagauggcac..   | 1  | 0 | th7 |
| .....aggacugcagagauggcacug     | 3  | 0 | th7 |
| .....aggacugcagagauggcacu.     | 12 | 0 | nct |
| .....aggacugcagagauggcacA.     | 1  | 1 | nct |
| .....aggacugcagagauggcacug     | 20 | 0 | nct |
| .....ggacugcagagauggcac..      | 1  | 0 | nct |
| gagccaucucucagccccuga.....     | 2  | 0 | cx1 |
| gagccaucucucCagcc.....         | 3  | 1 | Aml |
| .agccaucucucagcccU.....        | 2  | 1 | Aml |
| .....aggacugGagagaugg....      | 1  | 1 | Aml |









gacaggacaugcccuuauacugcugagcuaauucccuaacugcuauguggagcugcaguuagggaauuagcucagcaguaaagggaugacugcucuggaagaggaccca

|                                    |     |   |     |
|------------------------------------|-----|---|-----|
| .....uagggaauuagcucagcagua.....    | 1   | 0 | mm1 |
| .....guuaggAaauuagcucagcaguu.....  | 1   | 1 | te1 |
| .....uuagggaauuagcucagcaguu.....   | 1   | 0 | em2 |
| .....aguuagggaauuagcucagcag.....   | 2   | 0 | mE8 |
| .....uuagggaauuagcucagcaguu.....   | 1   | 0 | mE8 |
| .....guuaggAaauuagcucagcaguu.....  | 1   | 1 | ut1 |
| .....uuaggAaauuagcucagcaguu.....   | 1   | 1 | ut1 |
| .....uuaggAaauuagcucagcaguu.....   | 2   | 1 | ut1 |
| .....uagggaauuagcucagcaguu.....    | 1   | 0 | ut1 |
| .....uuaggAaauuagcucagcaguu.....   | 1   | 1 | br2 |
| .....uuaggAaauuagcucagcaguu.....   | 1   | 1 | br2 |
| .....uuaggAaauuagcucagcaguu.....   | 1   | 1 | ov2 |
| .....uuagggaauuagcucagcaguu.....   | 1   | 0 | ntr |
| .....uagggaauuagcucagcaguu.....    | 1   | 0 | ntr |
| .....guuagggaauuagcucagcaguu.....  | 1   | 0 | mm2 |
| .....uuagggaauuagcucagcaguu.....   | 1   | 0 | mm2 |
| .....uagggaauuagcucagcaguu.....    | 1   | 1 | hr3 |
| .....aguuagggaauuagcucagcaguu..... | 1   | 0 | c4t |
| .....uuauacugcugagcuaaa.....       | 1   | 1 | hi1 |
| .....ugcugagcuaauucccuaacug.....   | 1   | 0 | hi1 |
| .....Cacugcucuggaagaggacc.....     | 1   | 1 | Tp2 |
| .....ugcugagcuaauucccuaacu.....    | 1   | 0 | mE1 |
| .....uuaggAaauuagcucagc.....       | 2   | 1 | mE1 |
| .....uuaggAaauuagcucagc.....       | 1   | 1 | mE1 |
| .....uuaggCaaauuagcucagcaguu.....  | 1   | 1 | mE1 |
| .....uuaggAaauuagcucagcaguu.....   | 4   | 1 | mE1 |
| .....uuaggAaauuagcucagcaguu.....   | 4   | 1 | mE1 |
| .....uuaggAaauuagcucagcaguu.....   | 3   | 1 | mE1 |
| .....guuaggAaauuagcucagcaguu.....  | 1   | 1 | nb3 |
| .....uuaggAaauuagcucagcaguu.....   | 1   | 1 | nb3 |
| .....cugcugagcuaauucccuaacu.....   | 10  | 0 | 3Ta |
| .....cugcugagcuaauucAcuaacu.....   | 1   | 1 | 3Ta |
| .....guuaggAaauuagcucagcaguu.....  | 11  | 1 | 3Ta |
| .....uuaggAaauuagcucagcaguu.....   | 6   | 1 | 3Ta |
| .....uuaggAaauuagcucagcaguu.....   | 129 | 1 | 3Ta |
| .....uuaggAaauuagcucagcaguu.....   | 125 | 1 | 3Ta |
| .....uuaggAaauuagcucagcaguu.....   | 12  | 1 | 3Ta |
| .....uuaggAaauuagcucagcaguu.....   | 1   | 1 | 3Ta |
| .....uaggAaauuagcucagcaguu.....    | 2   | 1 | 3Ta |
| .....uaggAaauuagcucagcaguu.....    | 1   | 1 | 3Ta |
| .....ugcugagcuaauucccuaacug.....   | 1   | 0 | li2 |
| .....aguuagggaauuagcucagcaguu..... | 1   | 0 | sg1 |
| .....uuagggaauuagcucagcaguu.....   | 1   | 0 | sg1 |
| .....uagggaauuagcucagcaguu.....    | 1   | 0 | sg1 |
| .....aguuagggaauuagcucagcaguu..... | 1   | 0 | nt4 |
| .....uuagggaauuagcucagcaguu.....   | 1   | 0 | nt4 |
| .....uagggaauuagcucagcaguu.....    | 1   | 0 | nt4 |
| .....uagggaauuagcucagcaguu.....    | 2   | 0 | nt4 |
| .....uuauacugcugagcuaauucc.....    | 1   | 0 | Tm1 |

gacaggacaugcccuauacugcugagcuaauucccuaacugcuauguggagcugcaguuagggaaauagcucagcaguaaagggaugacugcucuggaagaggaccca

|                                       |    |   |     |
|---------------------------------------|----|---|-----|
| .....uauacugcugagcuaauucccuaacug..... | 1  | 0 | Tm1 |
| .....gcuauuggagcugcag.....            | 1  | 0 | mm3 |
| .....guuagggaaauagcucagcaguu.....     | 2  | 0 | mm3 |
| .....uuagggaaauagcucagcaguu.....      | 3  | 0 | mm3 |
| .....uagggaaauagcucagcaguu.....       | 1  | 0 | mm3 |
| .....uuaggAaaauagcucagcagua.....      | 1  | 1 | nb2 |
| .....ugcugagcuaauucccuaacu.....       | 2  | 0 | Am1 |
| .....ugcugagcuaauAccuaacu.....        | 1  | 1 | Am1 |
| .....ugcugagcuaauucccuaacug.....      | 16 | 0 | Am1 |
| .....ugcCgagcuaauucccuaacug.....      | 1  | 1 | Am1 |



Provisional ID : chr19\_45771  
 Score total : 44.1  
 Score for star read(s) : 3.9  
 Score for read counts : 33.3  
 Score for mfe : 2.4  
 Score for randfold : 1.6  
 Score for cons. seed : 3  
 Total read count : 77  
 Mature read count : 53  
 Loop read count : 0  
 Star read count : 24

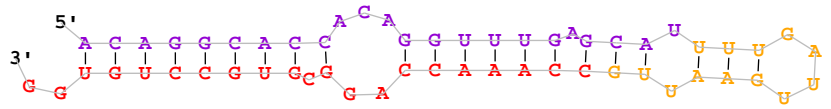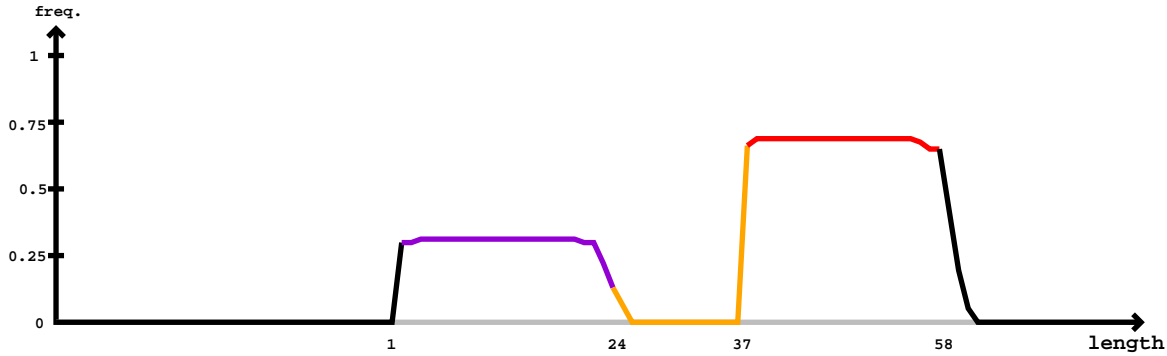

**Star** **Mature**

| 5'                                                                                                                | 3' | obs | exp | reads | mm | sample |
|-------------------------------------------------------------------------------------------------------------------|----|-----|-----|-------|----|--------|
| gauugcccaauauguguaucuccugggcuguguccacaggcaccacagguuuugagcauuugauugaauugccaaaccaggcgugccuguggacacagcacucacgggcucc  |    |     |     |       |    |        |
| gauugcccaauauguguaucuccugggcuguguccacaggcaccacagguuuugagcauuugauugaauugccaaaccaggcgugccuguggacacagcacucacgggcucc  |    |     |     |       |    |        |
| .....((((.....(.....).((((((((((((((((.....(((((((.....)))))))))))))))))))))))))))))))))))))))))))))))))))))))))) |    |     |     |       |    |        |
| .....acaggcaccacagguuuugagca.....                                                                                 |    | 1   | 0   |       |    | E15    |
| .....acaggcaccacagguuuugagc.....                                                                                  |    | 1   | 0   |       |    | hi2    |
| .....acaggcaccacagguuuugagcau.....                                                                                |    | 2   | 0   |       |    | lun    |
| .....acaggcaccacagguuuugagc.....                                                                                  |    | 1   | 0   |       |    | ay2    |
| .....acaggcaccacagguuuugagcau.....                                                                                |    | 1   | 0   |       |    | hr1    |
| .....acaggcaccacagguuuugagcU.....                                                                                 |    | 1   | 1   |       |    | hr2    |
| .....acaggcaccacagguuuugagcau.....                                                                                |    | 1   | 0   |       |    | hr2    |
| .....acaggcaccacagguuuugagcauu.....                                                                               |    | 1   | 0   |       |    | hr2    |
| .....ccaaaccaggcgugccuguggU.....                                                                                  |    | 3   | 1   |       |    | hr2    |
| .....acaggcaccacagguuuugagc.....                                                                                  |    | 3   | 0   |       |    | hi1    |
| .....acaggcaccacagguuuugagca.....                                                                                 |    | 1   | 0   |       |    | hi1    |
| .....acaggcaccacagguuuugagca.....                                                                                 |    | 1   | 0   |       |    | ut2    |
| .....acaggcaccacagguuuugagca.....                                                                                 |    | 1   | 0   |       |    | mus    |
| .....acaggcaccacagguuuugagcauu.....                                                                               |    | 1   | 0   |       |    | mus    |
| .....acaggcaccacagguuuugagcau.....                                                                                |    | 1   | 0   |       |    | oo1    |
| .....acaggcaccacagguuuuga.....                                                                                    |    | 1   | 0   |       |    | skn    |
| .....acaggcaccacagguuuugagca.....                                                                                 |    | 1   | 0   |       |    | skn    |
| .....acaggcaccacagguuuugagcau.....                                                                                |    | 1   | 0   |       |    | skn    |
| .....ccaaaccaggcgugccug.....                                                                                      |    | 1   | 0   |       |    | skn    |
| .....acaggcaccacagguuuugagca.....                                                                                 |    | 1   | 0   |       |    | li2    |
| .....ccaaaccaggcgugccugu.....                                                                                     |    | 1   | 0   |       |    | li2    |
| .....ccaaaccaggcgugccugugg.....                                                                                   |    | 6   | 0   |       |    | li2    |

Star

Mature

|                                                                                                                                          |   |   |     |
|------------------------------------------------------------------------------------------------------------------------------------------|---|---|-----|
| gauugccaauaugugua <u>cuccugggcugugucc</u> <b>acaggcaccacagguuugagcau</b> uuugauugaauug <b>ccaaaccaggcgugccugugg</b> acacagcacucacgggcucc |   |   |     |
| .....ccaaaccaggcgugUcugugg.....                                                                                                          | 1 | 1 | li2 |
| .....ccaaaccaggcgugccuguggU.....                                                                                                         | 2 | 1 | li2 |
| .....ccaaaccaggcgugccugugga.....                                                                                                         | 1 | 0 | li2 |
| .....ccaaaccaggcgugccuguggaU.....                                                                                                        | 4 | 1 | li2 |
| .....ccaaaccaggcgugccuguggaA.....                                                                                                        | 2 | 1 | li2 |
| .....ccaaaccaggcgugccuguggaAa.....                                                                                                       | 1 | 1 | li2 |
| .....ccaaaccaggcgugUccugu.....                                                                                                           | 1 | 1 | li1 |
| .....ccaaaccaggcgugccugugC.....                                                                                                          | 1 | 1 | li1 |
| .....ccaaaUcaggcgugccugugg.....                                                                                                          | 1 | 1 | li1 |
| .....ccaaaccaggcgugccuguggA.....                                                                                                         | 1 | 1 | li1 |
| .....ccaaaccaggcgugccugugg.....                                                                                                          | 9 | 0 | li1 |
| .....ccaaaccaggcgugccugugga.....                                                                                                         | 4 | 0 | li1 |
| .....ccaaaccaggcgugccuguggU.....                                                                                                         | 4 | 1 | li1 |
| .....ccaaaccaggcgugccuguggaG.....                                                                                                        | 1 | 1 | li1 |
| .....ccaaaccaggcgugccuguggaA.....                                                                                                        | 3 | 1 | li1 |
| .....ccaaaccaggcgugccuguggaAa.....                                                                                                       | 3 | 1 | li1 |
| .....caaaaccaggcgugccuguggU.....                                                                                                         | 1 | 1 | li1 |
| .....caaaaccaggcgugccuguggaU.....                                                                                                        | 1 | 1 | li1 |
| .....acaggcaccacagguuugagcau.....                                                                                                        | 1 | 0 | sg1 |
| .....acaggcaccacagguuugagcau.....                                                                                                        | 1 | 0 | ut1 |
| .....aggcaccacagguuugagc.....                                                                                                            | 1 | 0 | cx1 |
| .....ccaaaccaggcgugccugugg.....                                                                                                          | 1 | 0 | cx1 |



miRBase precursor : mmu\_chr1\_19965  
 Total read count : 56  
 mmu\_chr1\_19965\* read count 49  
 mmu\_chr1\_19965 read count 6  
 remaining reads : 50

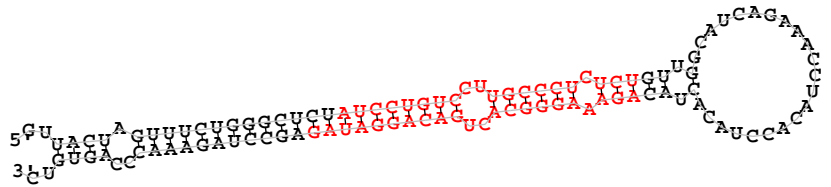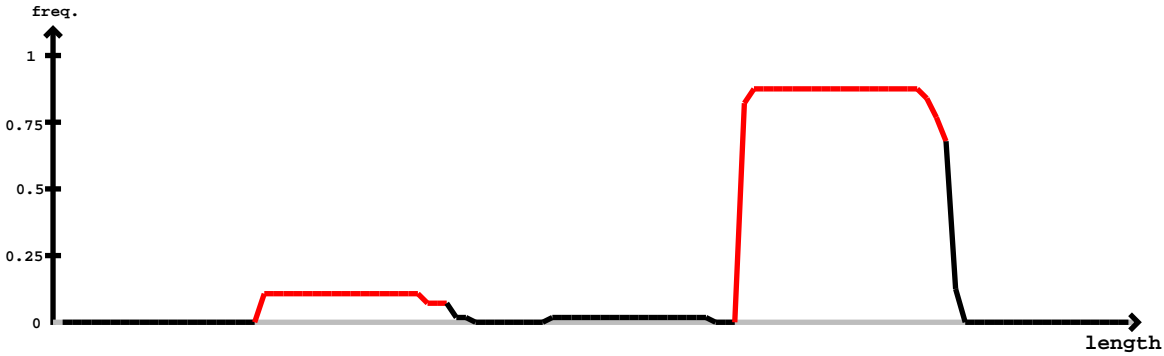

mmu\_chr1\_19965

mmu\_chr1\_19965\*

| 5' -                        | mmu_chr1_19965         | mmu_chr1_19965*       | -3'                | exp | reads | mm | sample |
|-----------------------------|------------------------|-----------------------|--------------------|-----|-------|----|--------|
| ..(((.(((.....))))).))..... | guuacuaguuuucugggcucu  | auccugucuuugcccucucug | agccuagaaaccaguguc |     | 1     | 0  | mbm    |
| .....                       | .....                  | .....                 | .....              |     | 1     | 0  | mus    |
| .....                       | auccugucuuugcccucucugu | .....                 | .....              |     | 1     | 0  | 3Ta    |
| .....                       | .....                  | .....                 | .....              |     | 1     | 0  | nkc    |
| .....                       | .....                  | .....                 | .....              |     | 1     | 0  | nkc    |
| .....                       | .....                  | .....                 | .....              |     | 8     | 0  | nkc    |
| .....                       | .....                  | .....                 | .....              |     | 1     | 0  | nkc    |
| .....                       | .....                  | .....                 | .....              |     | 1     | 0  | skn    |
| .....                       | .....                  | .....                 | .....              |     | 1     | 0  | nt2    |
| .....                       | auccugucuuugcccucucu   | .....                 | .....              |     | 2     | 0  | nt2    |
| .....                       | .....                  | .....                 | .....              |     | 1     | 0  | nt2    |
| .....                       | .....                  | .....                 | .....              |     | 2     | 0  | nt2    |
| .....                       | .....                  | .....                 | .....              |     | 5     | 0  | nt2    |
| .....                       | .....                  | .....                 | .....              |     | 1     | 0  | nt2    |
| .....                       | .....                  | .....                 | .....              |     | 2     | 0  | mdc    |
| .....                       | .....                  | .....                 | .....              |     | 3     | 0  | bm2    |
| .....                       | .....                  | .....                 | .....              |     | 1     | 1  | mE8    |
| .....                       | .....                  | .....                 | .....              |     | 1     | 0  | nt1    |
| .....                       | auccugucuuugcccucucu   | .....                 | .....              |     | 1     | 0  | nt1    |
| .....                       | .....                  | .....                 | .....              |     | 6     | 0  | nt1    |
| .....                       | .....                  | .....                 | .....              |     | 1     | 0  | c4t    |
| .....                       | .....                  | .....                 | .....              |     | 1     | 0  | c4t    |
| .....                       | .....                  | .....                 | .....              |     | 2     | 0  | c4t    |
| .....                       | .....                  | .....                 | .....              |     | 1     | 0  | c4t    |

mmu\_chr1\_19965

mmu\_chr1\_19965\*

guuacuaguuuucugggcucuauccuguccuugcccucucguuggcaucagaaaccuacacucacagaaagggcacugacaggauagagccuagaaacccaguguc

|                                   |   |   |     |
|-----------------------------------|---|---|-----|
| .....agaaagggcacugacaggau.....    | 2 | 0 | je2 |
| .....agaaagggcacugacaggauU.....   | 1 | 1 | je2 |
| .....agaaagggcacugacaggauaga..... | 1 | 0 | th7 |
| .....agaaagggcacugacaggauU.....   | 1 | 1 | je1 |
| .....agaaagggcacugacaggauagU..... | 2 | 1 | je1 |
| .....agaaagggcacugacaggauag.....  | 1 | 0 | c8t |
| .....gaaagggcacugacaggauaga.....  | 1 | 0 | c8t |
| .....agaaagggcacugacagga.....     | 1 | 0 | nct |



auaaacuucccugcacacaccaaauaccuaccuaggcagcagacucugccacagaaacugagugcauuuguccuguggguuggguuggcuuuugguuggcuuuggcauagcua

|                                     |    |   |     |
|-------------------------------------|----|---|-----|
| .....ccuguggguuggguuggcu.....       | 2  | 0 | gc2 |
| .....ccuguggguuggguuggcuu.....      | 1  | 0 | gc2 |
| .....ccuguggguuggguuggcuuu.....     | 27 | 0 | gc2 |
| .....uguggguuggguuggcuuu.....       | 2  | 0 | gc2 |
| .....ccuguggguuggguuggcuuu.....     | 1  | 0 | sp2 |
| .....ccuguggguuggguuggcuuug.....    | 3  | 0 | sp2 |
| .....cuguggguuggguuggcuuug.....     | 2  | 0 | sp2 |
| .....ccuguggguuggguuggcuuu.....     | 1  | 0 | hl1 |
| .....ccuguggguuggguuggcuuA.....     | 1  | 1 | hl1 |
| .....ccuguggguuggguuggcAu.....      | 1  | 1 | hlc |
| .....ccuguggguuggguuggcuuA.....     | 1  | 1 | hlc |
| .....ccuguggguuggguuggcuuug.....    | 5  | 0 | hlc |
| .....ccuguggguuggguuggcuuugA.....   | 2  | 1 | hlc |
| .....ggguuggguuggUuuugguu.....      | 2  | 1 | Am2 |
| .....ccuguggguuggguuggcuuu.....     | 11 | 0 | nt2 |
| .....uguggguuggguuggcuuu.....       | 1  | 0 | nt2 |
| .....ccuguggguuggguuggcuuu.....     | 3  | 0 | skn |
| .....ccuguggguuggguuggcu.....       | 1  | 0 | itr |
| .....ccuguggguuggguuggcuu.....      | 1  | 0 | itr |
| .....ccuguggguuggguuggcuuu.....     | 3  | 0 | itr |
| .....uguggguuggguuggcuuu.....       | 1  | 0 | bm2 |
| .....ccuguggguuggguuggcuuu.....     | 2  | 0 | hl2 |
| .....ccuguggguuggguuggcuuug.....    | 2  | 0 | hl2 |
| .....ccuguggguuggguuggcuuugU.....   | 1  | 1 | hl2 |
| .....ccuguggguuggguuggcu.....       | 1  | 0 | c8t |
| .....ccuguggguuggguuggcuuu.....     | 3  | 0 | c8t |
| .....ccuguggguuggguuggcuuug.....    | 2  | 0 | c8t |
| .....aggcagcagacucugccacagaaac..... | 2  | 0 | Tm2 |
| .....ccuguggguuggguuggcuuuU.....    | 1  | 1 | Tm2 |
| .....ccuguggguuggguuggcuuugU.....   | 2  | 1 | Tm2 |
| .....ccuguggguuggguuggcuuugU.....   | 1  | 1 | em1 |
| .....ccuguggguuggguuggcuu.....      | 1  | 0 | ntr |
| .....ccuguggguuggguuggcuuu.....     | 9  | 0 | ntr |
| .....ccuguggguuggguuggcuuu.....     | 2  | 0 | nt1 |
| .....uguggguuggguuggcuuu.....       | 1  | 0 | nt1 |
| .....ccuguggguuggguuggcu.....       | 1  | 0 | c4t |
| .....ccuguggguuggguuggcuuu.....     | 15 | 0 | c4t |
| .....ccuguggguuggguuggcuuug.....    | 1  | 0 | c4t |
| .....uguggguuggguuggcuuu.....       | 1  | 0 | c4t |
| .....uguggguuggguuggcuuugU.....     | 1  | 1 | hi1 |
| .....ccuguggguuggguuggcuuu.....     | 1  | 0 | pob |
| .....ccuguggguuggguuggcuuug.....    | 7  | 0 | pob |
| .....ccuguggguuggguuggcuuu.....     | 3  | 0 | peb |
| .....ccuguggguuggguuggcuuug.....    | 2  | 0 | peb |
| .....uguggguuggguuggcuuug.....      | 1  | 0 | peb |
| .....ccuguggguuggguuggcuuugC.....   | 1  | 1 | Tp1 |
| .....Gguggguuggguuggcu.....         | 1  | 1 | mE1 |
| .....ccuguggguuggguuggcuu.....      | 2  | 0 | bac |

auaaacuuccugcucacacaaauaccuaccuaggcacgacucucugccacagaaacugagugcauuuguccuguggguuggguuggcuuuugguuggcuuuggcauagcua

|                                   |    |   |     |
|-----------------------------------|----|---|-----|
| .....ccuguggguuggguuggcuuu.....   | 23 | 0 | bac |
| .....ccuguggguuggguuggcuuug.....  | 1  | 0 | bac |
| .....uguggguuggguuggcuuu.....     | 1  | 0 | bac |
| .....ccuguggguuggguuggcuuug.....  | 1  | 0 | mbm |
| .....ccuguggguuggguuggcuuu.....   | 4  | 0 | sp1 |
| .....ccuguggguuggguuggcuuug.....  | 7  | 0 | sp1 |
| .....uguggguuggguuggcuuug.....    | 1  | 0 | sp1 |
| .....ccuguggguuggguuggcuuug.....  | 2  | 0 | li1 |
| .....ccuguggguuggguuggcuuugU..... | 4  | 1 | li1 |
| .....ccuguggguuggguuggAuug.....   | 1  | 1 | li2 |
| .....ccuguggguuggguuggcuuug.....  | 1  | 0 | li2 |
| .....uguggguuggguuggcuuugU.....   | 2  | 1 | li2 |
| .....ccuguggguuggguuggcuuu.....   | 5  | 0 | imb |
| .....ccuguggguuggguuggcuuug.....  | 4  | 0 | imb |
| .....uguggguuggguuggcuuu.....     | 1  | 0 | imb |
| .....ccuguggguuggguuggcuuu.....   | 1  | 0 | bm1 |
| .....ccuguggguuggguuggcuu.....    | 1  | 0 | sg1 |
| .....ccuguggguuggguuggcuuu.....   | 6  | 0 | sg1 |
| .....aggcacgacucucugccacag.....   | 1  | 0 | th2 |
| .....ccuguggguuggguuggc.....      | 1  | 0 | th2 |
| .....ccuguggguuggguuggcu.....     | 2  | 0 | th2 |
| .....ccuguggguuggguuggcuu.....    | 1  | 0 | th2 |
| .....ccuguggguuggguuggcuuu.....   | 3  | 0 | th2 |
| .....aggcacgacucucugccacaga.....  | 2  | 0 | Tm1 |
| .....aggcacgacucuaAgccacagaa..... | 1  | 1 | Tm1 |
| .....ccuguggguuggguuggc.....      | 1  | 0 | Tm1 |
| .....ccuguggguuggguuggcuuu.....   | 2  | 0 | Tm1 |
| .....ccuguggguuggguuggcuuugA..... | 1  | 1 | Tm1 |
| .....ccuguggguuggguuggcuuugU..... | 3  | 1 | Tm1 |
| .....ccuguggguuggguuggcuu.....    | 1  | 0 | th7 |
| .....ccuguggguuggguuggcuuu.....   | 19 | 0 | th7 |
| .....ccuguggguuggguuggcu.....     | 1  | 0 | nct |
| .....ccuguggguuggguuggcuuu.....   | 6  | 0 | nct |
| .....ggguuggguuggUuuugguu.....    | 1  | 1 | Am1 |



Mature

Star

| Sequence                                                                                                    | Mature Count | Star Count | Label |
|-------------------------------------------------------------------------------------------------------------|--------------|------------|-------|
| gagcccggggcaaccugccaggcgccucugagcuugugcuugucgcccaggcgccuagcgagcgaagcccaggccagaccuuuuacuugggacgggcggaagagaag |              |            |       |
| .....gagcgaAAcccaagcgcaga.....                                                                              | 1            | 1          | CFU   |
| .....gagcgaagcccaaCcgccaga.....                                                                             | 1            | 1          | CFU   |
| .....gagcgcAgcccaggcgcaga.....                                                                              | 2            | 1          | CFU   |
| .....gagcgaagcccaagcgcaga.....                                                                              | 13           | 0          | CFU   |
| .....gagcgaagcccaagcgcagC.....                                                                              | 1            | 1          | CFU   |
| .....gagcgaagcccaagcgcagG.....                                                                              | 1            | 1          | CFU   |
| .....gagcgaagcccAgcgcaga.....                                                                               | 2            | 1          | CFU   |
| .....gaagcccaagcgcagaccuu.....                                                                              | 1            | 0          | CFU   |
| .....gaCgcccaagcgcagaccuuu.....                                                                             | 1            | 1          | CFU   |
| .....gaagcccaagcgcagaccuuu.....                                                                             | 4            | 0          | CFU   |
| .....gaagcccaagcgcagaccuuuA.....                                                                            | 1            | 1          | CFU   |
| .....gaagcccaagcgcagaccuuu.....                                                                             | 3            | 0          | CFU   |
| .....ccuuuuacuugggacgggc.....                                                                               | 1            | 0          | CFU   |
| .....aggcgccucugagcuugugcuugu.....                                                                          | 2            | 0          | 48t   |
| .....aagcccaagcgcagac.....                                                                                  | 1            | 0          | mED   |
| .....aggcgccucugagcuugugcuugu.....                                                                          | 1            | 0          | mzb   |
| .....gagcgaAAcccaagcgcaga.....                                                                              | 1            | 1          | t11   |
| .....gagcgaagcccaagcgcaga.....                                                                              | 10           | 0          | t11   |
| .....gaagcccaagcgcagaccuu.....                                                                              | 1            | 0          | t11   |
| .....gaagcccaagcgcagaccuuu.....                                                                             | 2            | 0          | t11   |
| .....ccuuuuacuugggacgggG.....                                                                               | 1            | 1          | t11   |
| .....ugggacgggGgggaagag.....                                                                                | 1            | 1          | t11   |
| .....caggcgccucugagcuugugcuugu.....                                                                         | 3            | 0          | gcb   |
| .....aggcgccucugagcuugugc.....                                                                              | 1            | 0          | gcb   |
| .....aggcgccucugagcuugugcuu.....                                                                            | 1            | 0          | gcb   |
| .....aggcgccucugagcuugugcuug.....                                                                           | 10           | 0          | gcb   |
| .....aggcgccucugagcuugugcuugu.....                                                                          | 19           | 0          | gcb   |
| .....aggcgccucugagcuugugcuuguc.....                                                                         | 5            | 0          | gcb   |
| .....aggcgccucugagcuugugcuugcg.....                                                                         | 8            | 0          | gcb   |
| .....cgagcgaagcccaagcgc.....                                                                                | 2            | 0          | gcb   |
| .....cgagcgaagcccaagcgcga.....                                                                              | 2            | 0          | gcb   |
| .....cgagcgaagcccaagcgcag.....                                                                              | 1            | 0          | gcb   |
| .....cgagcgaagcccaagcgcaga.....                                                                             | 2            | 0          | gcb   |
| .....gaagcccaagcgcagaccuu.....                                                                              | 1            | 0          | gcb   |
| .....agcccaagcgcagaccuuuuacu.....                                                                           | 1            | 0          | gcb   |
| .....aggcgccucugagcuugugcuug.....                                                                           | 1            | 0          | ut2   |
| .....cgagcgaagcccaagcgcaga.....                                                                             | 1            | 0          | ut2   |
| .....cgagcgaagcccaagcgcA.....                                                                               | 1            | 1          | je1   |
| .....ccaggcgccucugagcuugugcu.....                                                                           | 1            | 0          | pc1   |
| .....caggcgccucugagcuugugc.....                                                                             | 1            | 0          | pc1   |
| .....caggcgccucugagcuugugcuu.....                                                                           | 1            | 0          | pc1   |
| .....aggcgccucugagcuugug.....                                                                               | 3            | 0          | pc1   |
| .....aggcgccucugagcuugugc.....                                                                              | 2            | 0          | pc1   |
| .....aggcgccucugagcuugugcu.....                                                                             | 5            | 0          | pc1   |
| .....aggcgccucugagcuugugcuu.....                                                                            | 17           | 0          | pc1   |
| .....aggcgccucugagcuugugcuug.....                                                                           | 16           | 0          | pc1   |
| .....aggcgccucugagcuugugcuugu.....                                                                          | 27           | 0          | pc1   |
| .....aggcgccucugagcuugugcuuguc.....                                                                         | 3            | 0          | pc1   |
| .....aggcgccucugagcuugugcuugcg.....                                                                         | 2            | 0          | pc1   |
| .....cgagcgaagcccaagcgc.....                                                                                | 1            | 0          | pc1   |
| .....cgagcgaagcccaagcgcga.....                                                                              | 3            | 0          | pc1   |
| .....aagcccaagcgcagaccuu.....                                                                               | 1            | 0          | pc1   |
| .....ccaggcgccucugagcuugugcu.....                                                                           | 1            | 0          | gc2   |
| .....ccaggcgccucugagcuugugcuu.....                                                                          | 1            | 0          | gc2   |
| .....caggcgccucugagcuugugc.....                                                                             | 1            | 0          | gc2   |
| .....caggcgccucugagcuugugcuugcg.....                                                                        | 1            | 0          | gc2   |
| .....aggcgccucugagcuugugc.....                                                                              | 2            | 0          | gc2   |
| .....aggcgccucugagcuugugcu.....                                                                             | 1            | 0          | gc2   |
| .....aggcgccucugagcuugugcuu.....                                                                            | 11           | 0          | gc2   |
| .....aggcgccucugagcuugugcuug.....                                                                           | 13           | 0          | gc2   |
| .....aggcgccucugagcuugugcuugu.....                                                                          | 16           | 0          | gc2   |

Mature

Star

|                                                                                                                 |    |   |     |
|-----------------------------------------------------------------------------------------------------------------|----|---|-----|
| gagcccggggcaaccugccaggcgccucugagcuugugcuugucgcccaggcgcuagcgcgagcgaagcccaagcgccagaccuuuuacuugggacgggagggaagagaag |    |   |     |
| .....aggcgccucugagcuugugcuuguc.....                                                                             | 5  | 0 | gc2 |
| .....aggcgccucugagcuugugcuugucg.....                                                                            | 2  | 0 | gc2 |
| .....cgagcgaagcccaagcgcc.....                                                                                   | 1  | 0 | gc2 |
| .....cgagcgaagcccaagcgcca.....                                                                                  | 3  | 0 | gc2 |
| .....cgagcgaagcccaagcgccag.....                                                                                 | 2  | 0 | gc2 |
| .....cgagcgaagcccaagcgccaga.....                                                                                | 5  | 0 | gc2 |
| .....agcgaagcccaagcgccaga.....                                                                                  | 1  | 0 | gc2 |
| .....aagcccaagcgccagaccuu.....                                                                                  | 1  | 0 | gc2 |
| .....caggcgccucugagcuugugcuu.....                                                                               | 1  | 0 | sp2 |
| .....caggcgccucugagcuugugcuug.....                                                                              | 1  | 0 | sp2 |
| .....aggcgccucugagcuugugcuu.....                                                                                | 1  | 0 | sp2 |
| .....aggcgccucugagcuugugcuug.....                                                                               | 7  | 0 | sp2 |
| .....aggcgccucugagcuugugcuugu.....                                                                              | 14 | 0 | sp2 |
| .....aggcgccucugagcuugugcuuguc.....                                                                             | 4  | 0 | sp2 |
| .....aggcgccucugagcuugugcuugucg.....                                                                            | 8  | 0 | sp2 |
| .....aggcgccucugagcuugugcuugucgc.....                                                                           | 1  | 0 | sp2 |
| .....cgagcgaagcccaagcgcca.....                                                                                  | 2  | 0 | sp2 |
| .....cgagcgaagcccaagcgccaga.....                                                                                | 2  | 0 | sp2 |
| .....gagcgaagcccaagcgccag.....                                                                                  | 1  | 0 | sp2 |
| .....gaagcccaagcgccagaccuu.....                                                                                 | 1  | 0 | sp2 |
| .....aggcgccCucugagcuuguc.....                                                                                  | 2  | 1 | Am2 |
| .....aggcgccucugagcuugugcuu.....                                                                                | 3  | 0 | Am2 |
| .....aggcgccucugagcuugugcuug.....                                                                               | 2  | 0 | Am2 |
| .....aggcgccucugagcuugugcuugu.....                                                                              | 2  | 0 | Am2 |
| .....gccucugagcuugugcuugucgc.....                                                                               | 1  | 0 | Am2 |
| .....uugucgccaggcgcuagcga.....                                                                                  | 2  | 0 | Am2 |
| .....cgagcgaagcccaagcgccaga.....                                                                                | 2  | 0 | te1 |
| .....cgagcgaagcccaagcgcca.....                                                                                  | 1  | 0 | mm1 |
| .....cgagcgaagcccaagcgccaga.....                                                                                | 1  | 0 | mm1 |
| .....gagcgaagcccaagcgccaga.....                                                                                 | 1  | 0 | mm1 |
| .....ccaggcgccucugagcuugugc.....                                                                                | 1  | 0 | skn |
| .....caggcgccucugagcuugugc.....                                                                                 | 1  | 0 | nt2 |
| .....aggcgccucugagcuugugcuug.....                                                                               | 1  | 0 | nt2 |
| .....aggcgccucugagcuugugcuugu.....                                                                              | 1  | 0 | nt2 |
| .....gccucugagcuugugcuugucgc.....                                                                               | 1  | 0 | em2 |
| .....aggcgccucugagcuugugc.....                                                                                  | 1  | 0 | bm2 |
| .....aggcgccucugagcuugugcuugu.....                                                                              | 1  | 0 | bm2 |
| .....cgagcgaagcccaagcgcc.....                                                                                   | 2  | 0 | bm2 |
| .....cgagcgaagcccaagcgcca.....                                                                                  | 1  | 0 | bm2 |
| .....cgagcgaagcccaagcgccaga.....                                                                                | 2  | 0 | bm2 |
| .....ccaggcgccucugagcuugugcuug.....                                                                             | 1  | 0 | mE8 |
| .....caggcgccucugagcuugugcuug.....                                                                              | 1  | 0 | mE8 |
| .....caggcgccucugagcuugugcuuAu.....                                                                             | 3  | 1 | mE8 |
| .....caggcgccucugagcuugugcuugu.....                                                                             | 1  | 0 | mE8 |
| .....aggcgccucugagcuugugcuugucgc.....                                                                           | 1  | 0 | mE8 |
| .....cgccucugagcuugugcuugucg.....                                                                               | 2  | 0 | mE8 |
| .....cgccucugagcuugugcuugucgc.....                                                                              | 3  | 0 | mE8 |
| .....gccucugagcuugugcuuguc.....                                                                                 | 1  | 0 | mE8 |
| .....gccucugagcuugugcuugucgc.....                                                                               | 1  | 0 | mE8 |
| .....ccucugagcuugugcuugucgcc.....                                                                               | 1  | 0 | mE8 |
| .....cgagcgaagcccaagcgcca.....                                                                                  | 1  | 0 | mE8 |
| .....cgagcgaagcccaagcgccag.....                                                                                 | 2  | 0 | mE8 |
| .....cgagcgaagcccaagcgccCga.....                                                                                | 1  | 1 | mE8 |
| .....cgagcgaagcccaagcgccaga.....                                                                                | 25 | 0 | mE8 |
| .....cgagcgaAaccgaagcgccaga.....                                                                                | 1  | 1 | mE8 |
| .....cgagcgaagcccaagcgUcaga.....                                                                                | 1  | 1 | mE8 |
| .....gagcgaagcccaagcgccaga.....                                                                                 | 24 | 0 | mE8 |
| .....agcgaagcccaagcgccaga.....                                                                                  | 9  | 0 | mE8 |
| .....agcgaagcccaagcgccagac.....                                                                                 | 1  | 0 | mE8 |
| .....agcgaagcccaagcgccagaU.....                                                                                 | 1  | 1 | mE8 |
| .....gaagcccaagcgccaga.....                                                                                     | 3  | 0 | mE8 |



Mature

Star

|                                                               |                                                       |    |   |
|---------------------------------------------------------------|-------------------------------------------------------|----|---|
| gagcccggggcaaccugccaggcgccucugagcuugugcuugucgcccaggcgccgcuagc | gagcgaagcccaagcgccagaccuuuuuacuugggacgggcggggaagagaag |    |   |
| .....                                                         | gaagcccaagcgccagaccuu.....                            | 3  | 0 |
| .....                                                         | gaagcccaagcgccagaccuuu.....                           | 3  | 0 |
| .....                                                         | aagcccaagcgccagaccuu.....                             | 1  | 0 |
| .....                                                         | aagcccaagcgccCgaccuu.....                             | 1  | 1 |
| .....                                                         | aagcccaagcgccagCccuuu.....                            | 1  | 1 |
| .....                                                         | aagcccaagcgccaAaccuuu.....                            | 1  | 1 |
| .....                                                         | aagcccaagcgccagaccuuu.....                            | 1  | 0 |
| .....                                                         | aggcgccucugCgcuugugcuug.....                          | 1  | 1 |
| .....                                                         | aggcgccucugagcuugugcuugcU.....                        | 1  | 1 |
| .....                                                         | aggcgccucugagcuugugcuugu.....                         | 1  | 0 |
| .....                                                         | cgagcgaagcccaagcgcca.....                             | 1  | 0 |
| .....                                                         | aggcgccucugagcuugugcuu.....                           | 1  | 0 |
| .....                                                         | agccAaagcgccagaccuuuu.....                            | 1  | 1 |
| .....                                                         | ccaagcgccagaccuuuuacuug.....                          | 1  | 0 |
| .....                                                         | aggcgccucugagcuugugcu.....                            | 1  | 0 |
| .....                                                         | aggcgccucugagcuugugcuugA.....                         | 1  | 1 |
| .....                                                         | aggcgccucugagcuugugcuugcg.....                        | 1  | 0 |
| .....                                                         | aggcgccucugagcuugugcuugu.....                         | 1  | 0 |
| .....                                                         | aggcgccucugagcuugugcuugc.....                         | 1  | 0 |
| .....                                                         | cgagcgaagcccaagcgcca.....                             | 1  | 0 |
| .....                                                         | ugggacgggGgggaagaga.....                              | 1  | 1 |
| .....                                                         | aggcgccucugagcuugugcu.....                            | 1  | 0 |
| .....                                                         | aggcgccucugagcuugugcuu.....                           | 2  | 0 |
| .....                                                         | aggcgccucugagcuugugcuug.....                          | 2  | 0 |
| .....                                                         | aggcgccucugagcuugugcuugu.....                         | 6  | 0 |
| .....                                                         | aggcgccucugagcuugugcuugcg.....                        | 2  | 0 |
| .....                                                         | aggcgccucugagcuugugcuu.....                           | 1  | 0 |
| .....                                                         | Acgccucugagcuugugcuugc.....                           | 1  | 1 |
| .....                                                         | cgagcgaagcccaagcgccaga.....                           | 2  | 0 |
| .....                                                         | gagcgaagcccaagcgccaga.....                            | 3  | 0 |
| .....                                                         | ccaggcgccucugagcuugugcu.....                          | 1  | 0 |
| .....                                                         | caggcgccucugagcuugugcuu.....                          | 2  | 0 |
| .....                                                         | aggcgccucugagcuugugcu.....                            | 2  | 0 |
| .....                                                         | aggcgccucugagcuugugcuu.....                           | 11 | 0 |
| .....                                                         | aggcgccucugagcuugugcuug.....                          | 9  | 0 |
| .....                                                         | aggcgccucugagcuugugcuugu.....                         | 14 | 0 |
| .....                                                         | aggcgccucugagcuugugcuugc.....                         | 3  | 0 |
| .....                                                         | cgagcgaagcccaagcgcca.....                             | 3  | 0 |
| .....                                                         | cgagcgaagcccaagcgccaga.....                           | 1  | 0 |
| .....                                                         | gagcgaagcccaagcgcca.....                              | 1  | 0 |
| .....                                                         | ugggacgggGgggaagaga.....                              | 1  | 1 |
| .....                                                         | cgagcgaagcccaagcgcca.....                             | 1  | 0 |
| .....                                                         | cgagcgaagcccaagcgccaga.....                           | 1  | 0 |
| .....                                                         | gcccaagcgccagaccuuuu.....                             | 1  | 0 |
| .....                                                         | cccaagcgccagaccuuuu.....                              | 1  | 0 |
| .....                                                         | aggcgccucugagcuugugcuugc.....                         | 1  | 0 |
| .....                                                         | ccaggcgccucugagcuugugcuugcA.....                      | 1  | 1 |
| .....                                                         | aggcgccucugagcuugugc.....                             | 1  | 0 |
| .....                                                         | caagcgccagaccuuuuacuugg.....                          | 1  | 0 |
| .....                                                         | gggacgggGgggaagag.....                                | 1  | 1 |
| .....                                                         | caggcgccucugagcuugugcuu.....                          | 1  | 0 |
| .....                                                         | aggcgccucugagcuugugcuugu.....                         | 5  | 0 |
| .....                                                         | aggcgccucugagcuugugcuugcg.....                        | 2  | 0 |
| .....                                                         | aggcgccucugagcuugugcuu.....                           | 1  | 0 |
| .....                                                         | aggcgccucugagcuugugcuugu.....                         | 1  | 0 |

Mature

Star

gagcccggggcaaccugccaggcgccucugagcuugugcugcgcagggcugcgcuagcgagcgaagcccaagcgccagaccuuuuacuugggacgggcggaagagaag

|                                     |    |   |     |
|-------------------------------------|----|---|-----|
| .....cUccucugagcuuguc.....          | 1  | 1 | Tp1 |
| .....uacuugggacgggcggaagagaag       | 1  | 0 | Tp1 |
| .....caggcgccucugagcuuguc.....      | 1  | 0 | bac |
| .....caggcgccucugagcuugucuu.....    | 2  | 0 | bac |
| .....caggcgccucugagcuugugcuugu..... | 2  | 0 | bac |
| .....aggcgccucugagcuugucuu.....     | 7  | 0 | bac |
| .....aggcgccucugagcuugugcuug.....   | 12 | 0 | bac |
| .....aggcgccucugagcuugugcuugu.....  | 14 | 0 | bac |
| .....aggcgccucugagcuugugcuugc.....  | 3  | 0 | bac |
| .....cgagcgaagcccaagcgcc.....       | 1  | 0 | bac |
| .....cgagcgaagcccaagcgcca.....      | 2  | 0 | bac |
| .....cgagcgaagcccaagcgccag.....     | 1  | 0 | bac |
| .....cgagcgaagcccaagcgccaga.....    | 2  | 0 | bac |
| .....gagcgaagcccaagcgccaga.....     | 1  | 0 | bac |
| .....agcgaagcccaagcgccag.....       | 1  | 0 | bac |
| .....aggcgccucuaagcuugucuu.....     | 1  | 1 | mE1 |
| .....aggcgccucugagcuugugcuuguc..... | 2  | 0 | mE1 |
| .....gcgccucugagcuugugcuuu.....     | 2  | 0 | mE1 |
| .....gcgccucugagcuugugcuug.....     | 1  | 0 | mE1 |
| .....cgccucugagcuugugcuugc.....     | 1  | 0 | mE1 |
| .....cgagcgaagcccaagcgcc.....       | 1  | 0 | mE1 |
| .....cgagcgaagcccaagcgccaga.....    | 1  | 0 | mE1 |
| .....gagcgaagcccaagcgccaga.....     | 2  | 0 | mE1 |
| .....gagcgaagcccaagcgccagac.....    | 1  | 0 | mE1 |
| .....gaagcccCagcgccagaccuuu.....    | 2  | 1 | mE1 |
| .....gaagcccagcgccagaccuuu.....     | 1  | 0 | mE1 |
| .....aggcgccucugagcuugugcuugu.....  | 1  | 0 | mbm |
| .....aggcgccucugagcuugugcuugc.....  | 1  | 0 | mbm |
| .....cgagcgaagcccaagcgccaga.....    | 1  | 0 | mbm |
| .....agcgaagcccaagcgccag.....       | 1  | 0 | mbm |
| .....gaagcccagcgccagaccuuu.....     | 1  | 0 | mbm |
| .....caggcgccucugagcuugugcuuu.....  | 2  | 0 | sp1 |
| .....caggcgccucugagcuugugcuugu..... | 3  | 0 | sp1 |
| .....aggcgccucugagcuugugcuuu.....   | 2  | 0 | sp1 |
| .....aggcgccucugagcuugugcuug.....   | 3  | 0 | sp1 |
| .....aggcgccucugagcuugugcuugu.....  | 4  | 0 | sp1 |
| .....aggcgccucugagcuugugcuugc.....  | 3  | 0 | sp1 |
| .....aggcgccucugagcuugugcuugc.....  | 5  | 0 | sp1 |
| .....cucugagcuugugcuugcgcc.....     | 1  | 0 | sp1 |
| .....cuugcgcagggcugcgcuag.....      | 1  | 0 | sp1 |
| .....cgagcgaagcccaagcgcc.....       | 1  | 0 | sp1 |
| .....cgagcgaagcccaagcgcca.....      | 1  | 0 | sp1 |
| .....cgagcgaagcccaagcgccag.....     | 1  | 0 | sp1 |
| .....gagcgaagcccaagcgccaga.....     | 1  | 0 | sp1 |
| .....agcgaagcccaagcgccaga.....      | 1  | 0 | sp1 |
| .....gaagcccagcgccagaccuu.....      | 1  | 0 | sp1 |
| .....gcccugagcuugugcuugc.....       | 1  | 0 | li2 |
| .....ccucugagcuugugcuugcgc.....     | 1  | 0 | li2 |
| .....cgagcgaagcccaagcgcc.....       | 1  | 0 | li2 |
| .....cgagcgaagcccaagcgcca.....      | 1  | 0 | li2 |
| .....cgagcgaagcccaagcgccaga.....    | 3  | 0 | li2 |
| .....gagcgaagcccaagcgcca.....       | 1  | 0 | li2 |
| .....gagcgaagcccaagcgccagac.....    | 1  | 0 | li2 |
| .....gaagcccagcgccagaccuu.....      | 1  | 1 | li2 |
| .....gggacgggGgggaagaga.....        | 1  | 1 | li2 |
| .....aggcgccucugagcuugugcuugu.....  | 3  | 0 | li1 |
| .....aggcgccucugagcuugugcuugc.....  | 1  | 0 | li1 |
| .....cgccucugagcuugugcuugcgc.....   | 1  | 0 | li1 |
| .....gcccucugagcuugugcuugcgc.....   | 1  | 0 | li1 |
| .....ccucugagcuugugcuugcgc.....     | 2  | 0 | li1 |
| .....cucugagcuugugcuugc.....        | 1  | 0 | li1 |
| .....cucugagcuugugcuugcgc.....      | 1  | 0 | li1 |
| .....ucugagcuugugcuugcgc.....       | 3  | 0 | li1 |

Mature

Star

|                                                                                                                |   |   |     |
|----------------------------------------------------------------------------------------------------------------|---|---|-----|
| gagcccggggcaaccugccaggcgccucugagcuugugcuugucgccaggcgcgcuagcgagcgaagcccaagcgccagaccuuuuacuugggacggcggggaagagaag |   |   |     |
| .....cgagcgaagcccaagcUc.....                                                                                   | 1 | 1 | li1 |
| .....cgagcgaagcccaagcgccaga.....                                                                               | 4 | 0 | li1 |
| .....gagcgaagcccaagcgccaga.....                                                                                | 3 | 0 | li1 |
| .....agcgaagcccaagcgccaga.....                                                                                 | 1 | 0 | li1 |
| .....agcgaagcccaCgcgccaga.....                                                                                 | 1 | 1 | li1 |
| .....ccaagcgccagaccuuuu.....                                                                                   | 1 | 0 | li1 |
| .....aggcgccucugagcuugugcuug.....                                                                              | 2 | 0 | imb |
| .....aggcgccucugagcuugugcuug.....                                                                              | 1 | 0 | imb |
| .....aggcgccucugagcuugugcuugc.....                                                                             | 1 | 0 | imb |
| .....agcgaagcccaagcgccaga.....                                                                                 | 1 | 0 | imb |
| .....caggcgccucugagcuugugc.....                                                                                | 2 | 0 | th2 |
| .....caggcgccucugagcuugugcu.....                                                                               | 1 | 0 | th2 |
| .....caggcgccucugagcuugugcuugu.....                                                                            | 1 | 0 | th2 |
| .....aggcgccucugagcuugugc.....                                                                                 | 1 | 0 | th2 |
| .....aggcgccucugagcuugugcu.....                                                                                | 3 | 0 | th2 |
| .....aggcgccucugagcuugugcuu.....                                                                               | 5 | 0 | th2 |
| .....aggcgccucugagcuugugcuug.....                                                                              | 1 | 0 | th2 |
| .....aggcgccucugagcuugugcuugu.....                                                                             | 3 | 0 | th2 |
| .....aggcgccucugagcuugugcuugc.....                                                                             | 1 | 0 | th2 |
| .....aggcgccucugagcuugugcuugcg.....                                                                            | 1 | 0 | th2 |
| .....cgagcgaagcccaagcgccaga.....                                                                               | 2 | 0 | th2 |
| .....agcgaagcccaagcgccaga.....                                                                                 | 2 | 0 | th2 |
| .....gaagcccaagcgccagaccuuu.....                                                                               | 1 | 0 | th2 |
| .....aggcgccucugagcuugugc.....                                                                                 | 1 | 0 | Tm1 |
| .....aggcgccucugagcuugugcu.....                                                                                | 1 | 0 | Tm1 |
| .....aggcgccucugagcuuguUcuug.....                                                                              | 1 | 1 | Tm1 |
| .....aggcgccucugagcuugugcuug.....                                                                              | 3 | 0 | Tm1 |
| .....aggAgccucugagcuugugcuugcg.....                                                                            | 1 | 1 | Tm1 |
| .....aggcgccucugagcuugugcuugcg.....                                                                            | 2 | 0 | Tm1 |
| .....cgagcgaagcccaagcgccaga.....                                                                               | 1 | 0 | Tm1 |
| .....gagcgaagcccaagcgccaga.....                                                                                | 1 | 0 | Tm1 |
| .....aggcgccucugagcuugugcuu.....                                                                               | 1 | 0 | em3 |
| .....cgagcgaagcccaagcGA.....                                                                                   | 1 | 1 | em3 |
| .....cgagcgaagcccaagcgcca.....                                                                                 | 1 | 0 | em3 |
| .....cgagcgaagcccaagcgccag.....                                                                                | 1 | 0 | em3 |
| .....Acaggcgccucugagcuugugcuugu.....                                                                           | 1 | 1 | mm3 |
| .....cgagcgaagcccaagcgccagU.....                                                                               | 1 | 1 | mm3 |
| .....cgagcgaagcccaagcgccaga.....                                                                               | 4 | 0 | mm3 |
| .....gagcgaagcccaagcgccaga.....                                                                                | 4 | 0 | mm3 |
| .....gaagcccaagcgccagaccuuu.....                                                                               | 1 | 0 | mm3 |
| .....aggcgccucugagcuugugc.....                                                                                 | 1 | 0 | th7 |
| .....ccaagcgccagaccuuuuacuug.....                                                                              | 1 | 0 | cx1 |
| .....caagcgccagaccuuuu.....                                                                                    | 1 | 0 | cx1 |
| .....aggcgccucugagcuugugcuugu.....                                                                             | 1 | 0 | nct |
| .....ccaggcgccucugagcuugugcuu.....                                                                             | 2 | 0 | Am1 |
| .....aggcgccCcuugugc.....                                                                                      | 1 | 1 | Am1 |
| .....aggcgccucugagcuugugc.....                                                                                 | 2 | 0 | Am1 |
| .....aggcgccucugagcuugugcuu.....                                                                               | 2 | 0 | Am1 |
| .....aggcgccucugagcuugugcuug.....                                                                              | 5 | 0 | Am1 |
| .....aggcgccucugagcuugugcuuA.....                                                                              | 1 | 1 | Am1 |
| .....Uggcgccucugagcuugugcuugu.....                                                                             | 1 | 1 | Am1 |
| .....aggcgccucugagcuugugcuugu.....                                                                             | 1 | 0 | Am1 |
| .....aggcgccucugagcuugugcuugCcg.....                                                                           | 2 | 1 | Am1 |
| .....aggcgccucugagcuugugcuugcgc.....                                                                           | 1 | 0 | Am1 |
| .....gccucugagcuugugcuugcgc.....                                                                               | 1 | 0 | Am1 |
| .....uuugcgcagcgcuagcga.....                                                                                   | 1 | 0 | Am1 |

miRBase precursor : mmu\_chr1\_8658  
 Total read count : 1116  
 mmu\_chr1\_8658 read count: 610  
 mmu\_chr1\_8658\* read count: 505  
 remaining reads : 506

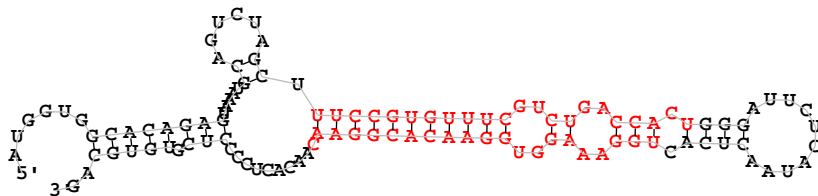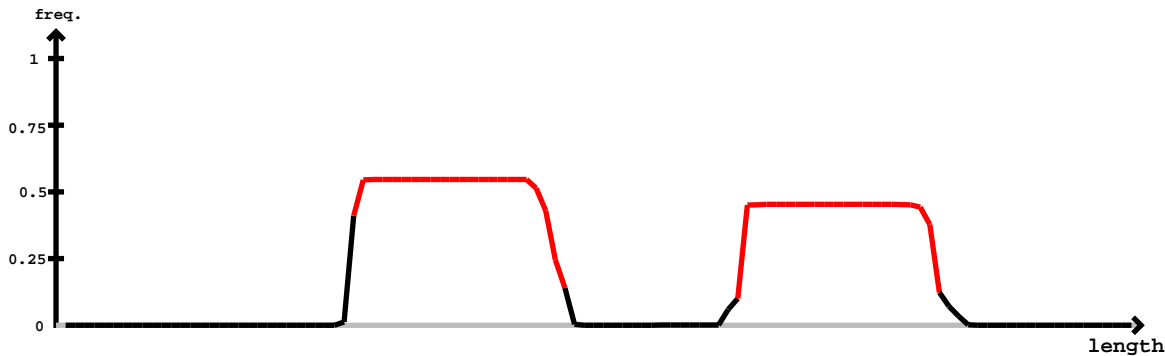

| 5' -                                                                        | mmu_chr1_8658                                                                       | mmu_chr1_8658*                                                                      | -3'                          | exp   | reads | mm | sample |
|-----------------------------------------------------------------------------|-------------------------------------------------------------------------------------|-------------------------------------------------------------------------------------|------------------------------|-------|-------|----|--------|
| .....(((((((.....((.....))).(((((((((((.....)))))).....)))))).....))))..... | .....UUCGUGUUCGUCUGACCACUGGGAUUCUCAUAACUCACUGGAAAGGUGGAACACGGAACAACACUCCCCUCGUGGCAG | .....UUCGUGUUCGUCUGACCACUGGGAUUCUCAUAACUCACUGGAAAGGUGGAACACGGAACAACACUCCCCUCGUGGCAG | .....aAUGGAAAGGUGGAACAC..... | ..... | 1     | 1  | Tm2    |
| .....CUUUCGUGUUCGUCUGACCA.....                                              | .....CUUUCGUGUUCGUCUGACCA.....                                                      | .....CUUUCGUGUUCGUCUGACCA.....                                                      | .....                        | ..... | 1     | 0  | nkc    |
| .....UUUCGUGUUCGUCUGAC.....                                                 | .....UUUCGUGUUCGUCUGAC.....                                                         | .....UUUCGUGUUCGUCUGAC.....                                                         | .....                        | ..... | 17    | 0  | nkc    |
| .....UUUCGUGUUCGUCUGACC.....                                                | .....UUUCGUGUUCGUCUGACC.....                                                        | .....UUUCGUGUUCGUCUGACC.....                                                        | .....                        | ..... | 34    | 0  | nkc    |
| .....UUUCGUGUUCGUCUGACCA.....                                               | .....UUUCGUGUUCGUCUGACCA.....                                                       | .....UUUCGUGUUCGUCUGACCA.....                                                       | .....                        | ..... | 65    | 0  | nkc    |
| .....UUUCGUGUUCGUCUGACCAC.....                                              | .....UUUCGUGUUCGUCUGACCAC.....                                                      | .....UUUCGUGUUCGUCUGACCAC.....                                                      | .....                        | ..... | 21    | 0  | nkc    |
| .....UUUCGUGUUCGUCUGACCACU.....                                             | .....UUUCGUGUUCGUCUGACCACU.....                                                     | .....UUUCGUGUUCGUCUGACCACU.....                                                     | .....                        | ..... | 5     | 0  | nkc    |
| .....UUUCGUGUUCGUCUGACC.....                                                | .....UUUCGUGUUCGUCUGACC.....                                                        | .....UUUCGUGUUCGUCUGACC.....                                                        | .....                        | ..... | 7     | 0  | nkc    |
| .....UUUCGUGUUCGUCUGACCA.....                                               | .....UUUCGUGUUCGUCUGACCA.....                                                       | .....UUUCGUGUUCGUCUGACCA.....                                                       | .....                        | ..... | 12    | 0  | nkc    |
| .....UUUCGUGUUCGUCUGACCACU.....                                             | .....UUUCGUGUUCGUCUGACCACU.....                                                     | .....UUUCGUGUUCGUCUGACCACU.....                                                     | .....                        | ..... | 40    | 0  | nkc    |
| .....UUUCGUGUUCGUCUGACCACUG.....                                            | .....UUUCGUGUUCGUCUGACCACUG.....                                                    | .....UUUCGUGUUCGUCUGACCACUG.....                                                    | .....                        | ..... | 2     | 0  | nkc    |
| .....ACUGGAAAGGUGGAACACG.....                                               | .....ACUGGAAAGGUGGAACACG.....                                                       | .....ACUGGAAAGGUGGAACACG.....                                                       | .....                        | ..... | 1     | 0  | nkc    |
| .....ACUGGAAAGGUGGAACACGGA.....                                             | .....ACUGGAAAGGUGGAACACGGA.....                                                     | .....ACUGGAAAGGUGGAACACGGA.....                                                     | .....                        | ..... | 3     | 0  | nkc    |
| .....ACUGGAAAGGUGGAACACGGAA.....                                            | .....ACUGGAAAGGUGGAACACGGAA.....                                                    | .....ACUGGAAAGGUGGAACACGGAA.....                                                    | .....                        | ..... | 4     | 0  | nkc    |
| .....ACUGGAAAGGUGGAACACGGAAAC.....                                          | .....ACUGGAAAGGUGGAACACGGAAAC.....                                                  | .....ACUGGAAAGGUGGAACACGGAAAC.....                                                  | .....                        | ..... | 1     | 0  | nkc    |
| .....CUGGAAAGGUGGAACACGGA.....                                              | .....CUGGAAAGGUGGAACACGGA.....                                                      | .....CUGGAAAGGUGGAACACGGA.....                                                      | .....                        | ..... | 4     | 0  | nkc    |
| .....CUGGAAAGGUGGAACACGGAA.....                                             | .....CUGGAAAGGUGGAACACGGAA.....                                                     | .....CUGGAAAGGUGGAACACGGAA.....                                                     | .....                        | ..... | 7     | 0  | nkc    |
| .....UGGAAAGGUGGAACACGGA.....                                               | .....UGGAAAGGUGGAACACGGA.....                                                       | .....UGGAAAGGUGGAACACGGA.....                                                       | .....                        | ..... | 3     | 1  | nkc    |
| .....UGGAAAGGUGGAACACGGA.....                                               | .....UGGAAAGGUGGAACACGGA.....                                                       | .....UGGAAAGGUGGAACACGGA.....                                                       | .....                        | ..... | 6     | 0  | nkc    |
| .....UGGAAAGGUGGAACACGGAA.....                                              | .....UGGAAAGGUGGAACACGGAA.....                                                      | .....UGGAAAGGUGGAACACGGAA.....                                                      | .....                        | ..... | 79    | 0  | nkc    |
| .....UGGAAAGGUGGAACACGGAAAC.....                                            | .....UGGAAAGGUGGAACACGGAAAC.....                                                    | .....UGGAAAGGUGGAACACGGAAAC.....                                                    | .....                        | ..... | 11    | 0  | nkc    |
| .....UGGAAAGGUGGAACACGGAAACA.....                                           | .....UGGAAAGGUGGAACACGGAAACA.....                                                   | .....UGGAAAGGUGGAACACGGAAACA.....                                                   | .....                        | ..... | 13    | 0  | nkc    |
| .....UGGAAAGGUGGAACACGGAAACAA.....                                          | .....UGGAAAGGUGGAACACGGAAACAA.....                                                  | .....UGGAAAGGUGGAACACGGAAACAA.....                                                  | .....                        | ..... | 16    | 0  | nkc    |
| .....GAAAGGUGGAACACGGAAACAA.....                                            | .....GAAAGGUGGAACACGGAAACAA.....                                                    | .....GAAAGGUGGAACACGGAAACAA.....                                                    | .....                        | ..... | 1     | 0  | nkc    |
| .....ACUGGAAAGGUGGAACACGGAA.....                                            | .....ACUGGAAAGGUGGAACACGGAA.....                                                    | .....ACUGGAAAGGUGGAACACGGAA.....                                                    | .....                        | ..... | 1     | 0  | ntr    |
| .....UUUCGUGUUCGUCUGACCA.....                                               | .....UUUCGUGUUCGUCUGACCA.....                                                       | .....UUUCGUGUUCGUCUGACCA.....                                                       | .....                        | ..... | 1     | 0  | mdc    |
| .....UUUCGUGUUCGUCUGACCACU.....                                             | .....UUUCGUGUUCGUCUGACCACU.....                                                     | .....UUUCGUGUUCGUCUGACCACU.....                                                     | .....                        | ..... | 1     | 0  | mdc    |
| .....UGGAAAGGUGGAACACGGAA.....                                              | .....UGGAAAGGUGGAACACGGAA.....                                                      | .....UGGAAAGGUGGAACACGGAA.....                                                      | .....                        | ..... | 1     | 0  | mzb    |
| .....UGGAAAGGUGGAACACGGAAACA.....                                           | .....UGGAAAGGUGGAACACGGAAACA.....                                                   | .....UGGAAAGGUGGAACACGGAAACA.....                                                   | .....                        | ..... | 1     | 0  | mzb    |

augguggcacagagaaaaugcagucagcuuuccguguuucgucugaccaucugggaauucuaaaacucacuggaaagguggaacacggaacaacacucccugugugcag

|                                   |    |   |     |
|-----------------------------------|----|---|-----|
| .....cuuuccguguuucgucugacc.....   | 2  | 0 | gcb |
| .....uuuccguguuucgucugac.....     | 3  | 0 | gcb |
| .....uuuccguguuucgucugacc.....    | 17 | 0 | gcb |
| .....uuuccguguuucgucugacca.....   | 29 | 0 | gcb |
| .....uuuccguguuucgucugaccac.....  | 27 | 0 | gcb |
| .....uuuccguguuucgucugaccacu..... | 5  | 0 | gcb |
| .....uuccguguuucgucugacc.....     | 1  | 0 | gcb |
| .....uuccguguuucgucugacca.....    | 1  | 0 | gcb |
| .....uuccguguuucgucugaccac.....   | 2  | 0 | gcb |
| .....uuccguguuucgucugaccacu.....  | 12 | 0 | gcb |
| .....acuggaaagguggaacacgg.....    | 3  | 0 | gcb |
| .....acuggaaagguggaacacgga.....   | 3  | 0 | gcb |
| .....acuggaaagguggaacacgga.....   | 3  | 0 | gcb |
| .....cuggaaagguggaacacgga.....    | 1  | 0 | gcb |
| .....cuggaaagguggaacacgga.....    | 3  | 0 | gcb |
| .....uggaaagguggaacacgga.....     | 15 | 0 | gcb |
| .....uggaaagguggaacacgga.....     | 33 | 0 | gcb |
| .....uggaaagguggaacacggaac.....   | 12 | 0 | gcb |
| .....uggaaagguggaacacggaaca.....  | 11 | 0 | gcb |
| .....uggaaagguggaacacggaacaa..... | 5  | 0 | gcb |
| .....ggaagguggaacacgga.....       | 1  | 0 | gcb |
| .....uuuccguguuucgucugac.....     | 6  | 0 | c4t |
| .....uuuccguguuucgucugacc.....    | 11 | 0 | c4t |
| .....uuuccguguuucgucugacca.....   | 25 | 0 | c4t |
| .....uuuccguguuucgucugaccac.....  | 1  | 0 | c4t |
| .....uuuccguguuucgucugaccacu..... | 1  | 0 | c4t |
| .....uuccguguuucgucugacc.....     | 3  | 0 | c4t |
| .....uuccguguuucgucugacca.....    | 1  | 0 | c4t |
| .....uuccguguuucgucugaccacu.....  | 2  | 0 | c4t |
| .....acuggaaagguggaacacgg.....    | 1  | 0 | c4t |
| .....acuggaaagguggaacacgga.....   | 2  | 0 | c4t |
| .....cuggaaagguggaacacgga.....    | 1  | 0 | c4t |
| .....cuggaaagguggaacacgga.....    | 1  | 0 | c4t |
| .....uggaaagguggaacacgga.....     | 5  | 0 | c4t |
| .....uggaaagguggaacacggaac.....   | 31 | 0 | c4t |
| .....uggaaagguggaacacggaac.....   | 1  | 0 | c4t |
| .....uggaaagguggaacacggaaca.....  | 2  | 0 | c4t |
| .....cuuuccguguuucgucugacca.....  | 1  | 0 | pob |
| .....cuuuccguguuucgucugaccac..... | 1  | 0 | pob |
| .....uuuccguguuucgucugac.....     | 3  | 0 | pob |
| .....uuuccguguuucgucugacc.....    | 4  | 0 | pob |
| .....uuuccguguuucgucugacca.....   | 9  | 0 | pob |
| .....uuuccguguuucgucugaccac.....  | 16 | 0 | pob |
| .....uuuccguguuucgucugaccacu..... | 6  | 0 | pob |
| .....uuccguguuucgucugacca.....    | 1  | 0 | pob |
| .....uuccguguuucgucugaccacu.....  | 10 | 0 | pob |
| .....acuggaaagguggaacacggaac..... | 1  | 0 | pob |
| .....uggaaagguggaacacgga.....     | 1  | 1 | pob |
| .....uggaaagguggaacacgga.....     | 6  | 0 | pob |
| .....uggaaagguggaacacggaaca.....  | 1  | 0 | pob |
| .....uggaaagguggaacacggaacaa..... | 3  | 0 | pob |
| .....cuuuccguguuucgucugaccac..... | 1  | 0 | peb |
| .....uuuccguguuucgucugac.....     | 4  | 0 | peb |
| .....uuuccguguuucgucugacc.....    | 7  | 0 | peb |
| .....uuuccguguuucgucugacca.....   | 36 | 0 | peb |
| .....uuuccguguuucgucugaccac.....  | 30 | 0 | peb |
| .....uuuccguguuucgucugaccacu..... | 11 | 0 | peb |
| .....uuccguguuucgucugaccac.....   | 4  | 0 | peb |
| .....uuccguguuucgucugaccacu.....  | 29 | 0 | peb |
| .....uuccguguuucgucugaccacug..... | 1  | 0 | peb |
| .....uuccguguuucgucugaccacug..... | 1  | 0 | peb |
| .....acuggaaagguggaacacgga.....   | 2  | 0 | peb |
| .....acuggaaagguggaacacggaac..... | 1  | 0 | peb |
| .....cuggaaagguggaacacgg.....     | 1  | 0 | peb |
| .....cuggaaagguggaacacgga.....    | 1  | 0 | peb |

augguggcacagagaaaaugcagucagcuuuccguguuucgucugaccaucugggaauucuaaaacucacuggaaagguggaacacggaacaacacucccucgugucag

|                                       |    |   |     |
|---------------------------------------|----|---|-----|
| .....cuggaaagguggaacacgga.....        | 2  | 0 | peb |
| .....cuggaaagguggaacacggaac.....      | 2  | 0 | peb |
| .....uggaaagguggaacacgga.....         | 1  | 0 | peb |
| .....uggaaagguggaacacgga.....         | 20 | 0 | peb |
| .....uggaaagguggaacacggaac.....       | 4  | 0 | peb |
| .....uggaaagguggaacacggaaca.....      | 2  | 0 | peb |
| .....uggaaagguggaacacggaacaa.....     | 3  | 0 | peb |
| .....uggaaagguggaacacggaacaac.....    | 1  | 0 | peb |
| .....gaaagguggaacacggaacaac.....      | 1  | 0 | peb |
| .....acuggaaagguggaacacgg.....        | 1  | 0 | gc2 |
| .....acuggaaagguggaacacgga.....       | 4  | 0 | gc2 |
| .....acuggaaagguggaacacgga.....       | 10 | 0 | gc2 |
| .....acuggaaagguggaacacggaac.....     | 1  | 0 | gc2 |
| .....cuggaaagguggaacacgg.....         | 1  | 0 | gc2 |
| .....cuggaaagguggaacacgga.....        | 1  | 0 | gc2 |
| .....cuggaaagguggaacacgga.....        | 4  | 0 | gc2 |
| .....uggaaagguggaacacgga.....         | 18 | 0 | gc2 |
| .....auaacucacuggaaagguggaacacgg..... | 1  | 0 | pc1 |
| .....acuggaaagguggaacacgg.....        | 1  | 0 | pc1 |
| .....acuggaaagguggaacacgga.....       | 2  | 0 | pc1 |
| .....uggaaagguggaacacgga.....         | 2  | 0 | pc1 |
| .....acuggaaagguggaacacgga.....       | 1  | 0 | bac |
| .....acuggaaagguggaacacgga.....       | 5  | 0 | bac |
| .....cuggaaagguggaacacgga.....        | 1  | 1 | bac |
| .....cuggaaagguggaacacgga.....        | 2  | 0 | bac |
| .....cuggaaagguggaacacgga.....        | 2  | 0 | bac |
| .....uggaaagguggaacacgga.....         | 1  | 0 | bac |
| .....uggaaagguggaacacgga.....         | 9  | 0 | bac |
| .....cuuuccguguuucgucugacca.....      | 1  | 0 | sp2 |
| .....cuuuccguguuucgucugaccacu.....    | 1  | 0 | sp2 |
| .....uuuccguguuucgucugac.....         | 2  | 0 | sp2 |
| .....uuuccguguuucgucugacc.....        | 1  | 0 | sp2 |
| .....uuuccguguuucgucugacca.....       | 5  | 0 | sp2 |
| .....uuuccguguuucgucugaccac.....      | 5  | 0 | sp2 |
| .....uuuccguguuucgucugaccacu.....     | 2  | 0 | sp2 |
| .....uuuccguguuucgucugaccacu.....     | 10 | 0 | sp2 |
| .....acuggaaagguggaacacgga.....       | 3  | 0 | sp2 |
| .....acuggaaagguggaacacggaac.....     | 4  | 0 | sp2 |
| .....cuggaaagguggaacacgga.....        | 1  | 0 | sp2 |
| .....cuggaaagguggaacacggaac.....      | 3  | 0 | sp2 |
| .....cuggaaagguggaacacggaaca.....     | 1  | 0 | sp2 |
| .....uggaaagguggaacacgga.....         | 3  | 0 | sp2 |
| .....uggaaagguggaacacgga.....         | 6  | 0 | sp2 |
| .....uggaaagguggaacacggaac.....       | 11 | 0 | sp2 |
| .....uggaaagguggaacacggaaca.....      | 6  | 0 | sp2 |
| .....uggaaagguggaacacggaacaa.....     | 5  | 0 | sp2 |
| .....cuuuccguguuucgucugacc.....       | 2  | 0 | sp1 |
| .....cuuuccguguuucgucugacca.....      | 1  | 0 | sp1 |
| .....uuuccguguuucgucugac.....         | 1  | 0 | sp1 |
| .....uuuccguguuucgucugacca.....       | 4  | 0 | sp1 |
| .....uuuccguguuucgucugaccac.....      | 4  | 0 | sp1 |
| .....uuuccguguuucgucugaccacu.....     | 5  | 0 | sp1 |
| .....cuggaaagguggaacacgga.....        | 1  | 0 | sp1 |
| .....uggaaagguggaacacgga.....         | 2  | 0 | sp1 |
| .....uggaaagguggaacacgga.....         | 4  | 0 | sp1 |
| .....uggaaagguggaacacggaac.....       | 3  | 0 | sp1 |
| .....uggaaagguggaacacggaaca.....      | 4  | 0 | sp1 |
| .....uggaaagguggaacacggaacaa.....     | 1  | 0 | sp1 |
| .....uggaaagguggaacacgga.....         | 1  | 0 | skn |
| .....uuuccguguuucgucugaccac.....      | 1  | 0 | nt2 |
| .....cuuuccguguuucgucugacca.....      | 2  | 0 | imb |

mmu\_chr1\_8658

augguggcacagagaaaugcagucucagcuuuccguguuucgucugaccaacugggauucucauaacucacuggaaagguggaacacggaaacaacacucccucgugugcag

|                                    |    |   |     |
|------------------------------------|----|---|-----|
| .....uuuccguguuucgucugacc.....     | 3  | 0 | imb |
| .....uuuccguguuucgucugacca.....    | 4  | 0 | imb |
| .....uuuccguguuucgucugaccac.....   | 2  | 0 | imb |
| .....uuuccguguuucgucugaccacu.....  | 3  | 0 | imb |
| .....uuuccguguuucgucugaccacu.....  | 5  | 0 | imb |
| .....uuccguguuucgucugaccacu.....   | 1  | 0 | imb |
| .....acuggaaagguggaacacggaa.....   | 2  | 0 | imb |
| .....acuggaaagguggaacacggaa.....   | 3  | 0 | imb |
| .....cuggaaagguggaacacggaa.....    | 2  | 0 | imb |
| .....cuggaaagguggaacacggaa.....    | 4  | 0 | imb |
| .....uggaaagguggaacacggaa.....     | 5  | 0 | imb |
| .....uggaaagguggaacacggaa.....     | 12 | 0 | imb |
| .....uggaaagguggaacacggaaac.....   | 3  | 0 | imb |
| .....uggaaagguggaacacggaaacaa..... | 2  | 0 | imb |
| .....uuuccguguuucgucugacca.....    | 1  | 0 | itr |
| .....acuggaaagguggaacacgg.....     | 1  | 0 | th2 |
| .....uggaaagguggaacacggaa.....     | 1  | 0 | th2 |
| .....uuuccguguuucgucugaccacu.....  | 1  | 0 | sg1 |
| .....uggaaagguggaacacggaa.....     | 1  | 0 | sg1 |
| .....uuuccguguuucgucugac.....      | 1  | 0 | nt4 |
| .....uuuccguguuucgucugacc.....     | 1  | 0 | nt4 |
| .....uuuccguguuucgucugacca.....    | 4  | 0 | nt4 |
| .....uuuccguguuucgucugaccac.....   | 1  | 0 | nt4 |
| .....uuuccguguuucgucugaccacu.....  | 1  | 0 | nt4 |
| .....uggaaagguggaacacggaa.....     | 1  | 0 | nt4 |
| .....uggaaagguggaacacggaa.....     | 2  | 0 | th7 |
| .....uuuccguguuucgucugacc.....     | 1  | 0 | c8t |
| .....uuuccguguuucgucugacca.....    | 1  | 0 | c8t |
| .....uuuccguguuucgucugaccacu.....  | 1  | 0 | c8t |
| .....uuuccguguuucgucugaccac.....   | 1  | 0 | nct |
| .....uggaaagguggaacacggaa.....     | 1  | 0 | nct |





gaugcauuccuggcgcguggcugcugaccgcgcauuuuuacucacgguacgaguuugaagugucacagcgcguaacaaaaguaauaaugugcugacccggcaaaagaugcgg

|                                    |   |   |     |
|------------------------------------|---|---|-----|
| .....guacaaaaguaauuu.....          | 1 | 0 | mE1 |
| .....guacaaaaguaauaaug.....        | 1 | 0 | mE1 |
| .....uacaaaaguaauaaug.....         | 1 | 0 | mE1 |
| .....auuuuacucacgguacgagu.....     | 1 | 0 | nb3 |
| .....cgcguaacaaaaguaauaaugug.....  | 1 | 0 | mbm |
| .....ugggcugcugaccgcgcauC.....     | 1 | 1 | pgr |
| .....gcauuuuacucacgguacgG.....     | 1 | 1 | li1 |
| .....gcauuuuacucacgguacga.....     | 1 | 0 | li1 |
| .....cauuuuuacucacgguacgagu.....   | 1 | 0 | li1 |
| .....cauuuuuacucacgguacgaguu.....  | 2 | 0 | li1 |
| .....cauuuuuacucacgguacgaguuu..... | 2 | 0 | li1 |
| .....auuuuuuacucacgguacgaguu.....  | 5 | 0 | li1 |
| .....auuuuuacuUacgguacgaguu.....   | 1 | 1 | li1 |
| .....auuuuuuacucacgguacgaguuA..... | 1 | 1 | li1 |
| .....cgcguaacaaaaguaauuu.....      | 1 | 0 | li1 |
| .....cgcguaacaaaaguaauaaugug.....  | 5 | 0 | li1 |
| .....cgcguaacaaaaguaauaaugugU..... | 1 | 1 | li1 |
| .....gcguaacaaaaguaauaaugugU.....  | 5 | 1 | li1 |
| .....uacaaaaguaauaaugugcu.....     | 2 | 0 | li1 |
| .....cauuuuuacucacgguacgaguu.....  | 1 | 0 | li2 |
| .....auuuuuuacucacgguacgaguu.....  | 2 | 0 | li2 |
| .....cgcguaacaaaaguaauaaugu.....   | 2 | 0 | li2 |
| .....cgcguaacaaaaguaauaaugug.....  | 2 | 0 | li2 |
| .....cgcguaacaaaaguaauaaugugU..... | 2 | 1 | li2 |
| .....gcguaacaaaaguaauaaugug.....   | 1 | 0 | li2 |
| .....gcguaacaaaaguaauaaugugU.....  | 3 | 1 | li2 |
| .....acaaaaguaauaaugu.....         | 1 | 0 | li2 |
| .....auuuuuuacucacgguacgaguu.....  | 1 | 0 | nt2 |
| .....cgcguaacaaaaguaauaaugug.....  | 1 | 0 | nt2 |
| .....cgcguaacaaaaguaauaaug.....    | 1 | 0 | th2 |
| .....cgcguaacaaaaguaauaaugu.....   | 1 | 0 | bm2 |
| .....cgcguaacaaaaguaauaaugu.....   | 1 | 0 | em3 |
| .....cgcguaacaaaaguaauaaugugA..... | 1 | 1 | em3 |
| .....cgcguaacaaaaguaauaaugu.....   | 1 | 0 | je2 |
| .....gcauuuuuacucacgguacga.....    | 1 | 0 | th7 |
| .....gcguaacaaaaguaauaaugug.....   | 1 | 0 | th7 |

miRBase precursor : mmu\_chr2\_23582  
 Total read count : 185  
 mmu\_chr2\_23582 read count 116  
 mmu\_chr2\_23582\* read count 4  
 remaining reads : 5

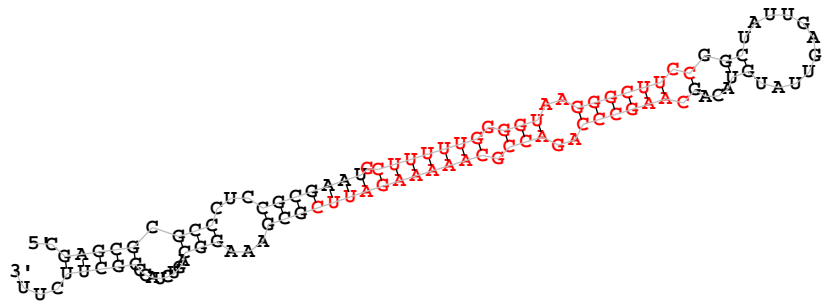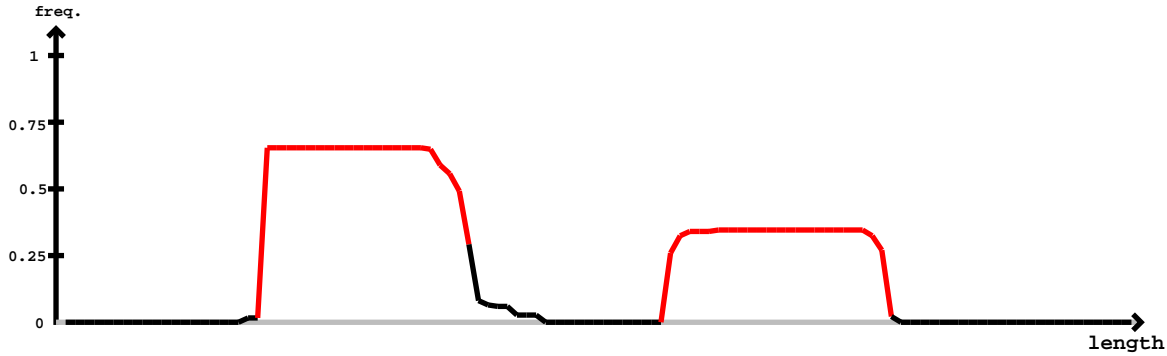

mmu\_chr2\_23582

mmu\_chr2\_23582\*

| 5' -                                                                                                                      | reads | mm | sample |
|---------------------------------------------------------------------------------------------------------------------------|-------|----|--------|
| cgagcgcgccucccgcaau <u>gcuuuuugggguaaagggcuucc</u> ggcuaauugaguuauuguacagcaagcccagaccgcaaaaagauucgcaaaagcagucuaaccgcuuucu | 2     | 0  | nt1    |
| .....gcuuuuugggguaaagggcuuc.....                                                                                          | 1     | 0  | nt1    |
| .....gcuuuuugggguaaagggcuucc.....                                                                                         | 3     | 0  | nt1    |
| .....caagcccagaccgcaaaaagauu.....                                                                                         | 2     | 0  | nt1    |
| .....aagcccagaccgcaaaaagauu.....                                                                                          | 1     | 0  | tp2    |
| .....gcuuuuugggguaaagggcuuc.....                                                                                          | 2     | 0  | pob    |
| .....caagcccagaccgcaaaaagauu.....                                                                                         | 1     | 0  | peb    |
| .....gcuuuuugggguaaagggcuucc.....                                                                                         | 1     | 0  | je1    |
| .....gcuuuuugggguaaagggcuuccU.....                                                                                        | 1     | 1  | tp1    |
| .....gcuuuuugggguaaagggcuu.....                                                                                           | 1     | 0  | mus    |
| .....gcuuuuugggguaaagggcuuc.....                                                                                          | 3     | 0  | mus    |
| .....gcuuuuugggguaaagggcuucc.....                                                                                         | 1     | 0  | mus    |
| .....caagcccagaccgcaaaaagauu.....                                                                                         | 1     | 0  | mus    |
| .....caagcccagaccgcaaaaagauuc.....                                                                                        | 1     | 0  | mus    |
| .....aagcccagaccgcaaaaagauu.....                                                                                          | 1     | 0  | mus    |
| .....augcuuuuugggguaaaggg.....                                                                                            | 1     | 0  | nt2    |
| .....gcuuuuugggguaaagggc.....                                                                                             | 6     | 0  | nt2    |
| .....gcuuuuugggguaaagggcu.....                                                                                            | 3     | 0  | nt2    |
| .....gcuuuuugggguaaagggcuu.....                                                                                           | 6     | 0  | nt2    |
| .....gcuuuuugggguaaagggcuuc.....                                                                                          | 16    | 0  | nt2    |
| .....gcuuuuugggguaaagggcuucc.....                                                                                         | 8     | 0  | nt2    |
| .....gcuuuuugggguaaagggcuuccggcu.....                                                                                     | 3     | 0  | nt2    |
| .....caagcccagaccgcaaaaaga.....                                                                                           | 2     | 0  | nt2    |
| .....caagcccagaccgcaaaaagau.....                                                                                          | 5     | 0  | nt2    |
| .....caagcccagaccgcaaaaagauu.....                                                                                         | 17    | 0  | nt2    |
| .....aagcccagaccgcaaaaagauu.....                                                                                          | 5     | 0  | nt2    |
| .....agcccagaccgcaaaaagau.....                                                                                            | 1     | 0  | nt2    |

cgagcgcgccuccgcgaau<sup>g</sup>cuuuu<sup>g</sup>ggg<sup>g</sup>uaagg<sup>g</sup>cuucc<sup>g</sup>gcua<sup>u</sup>gag<sup>u</sup>ua<sup>u</sup>g<sup>u</sup>ac<sup>g</sup>caag<sup>cc</sup>cag<sup>ac</sup>cgcaaaa<sup>g</sup>auuc<sup>g</sup>cgaa<sup>ag</sup>gcag<sup>u</sup>cuacc<sup>cg</sup>cuuc<sup>u</sup>

|                                                                                             |    |   |     |
|---------------------------------------------------------------------------------------------|----|---|-----|
| .....agcccagaccgcaaaaagauu.....                                                             | 2  | 0 | nt2 |
| .....augcuuuu <sup>g</sup> ggg <sup>g</sup> uaagg <sup>g</sup> cuu.....                     | 1  | 0 | skn |
| .....gcuuuu <sup>g</sup> ggg <sup>g</sup> uaagg <sup>g</sup> cuucc.....                     | 1  | 0 | skn |
| .....aagcccagaccgcaaaaagauu.....                                                            | 1  | 0 | skn |
| .....augcuuuu <sup>g</sup> ggg <sup>g</sup> uaagg <sup>g</sup> cuuU.....                    | 1  | 1 | li1 |
| .....gcuuuu <sup>g</sup> ggg <sup>g</sup> uaagg <sup>g</sup> c.....                         | 3  | 0 | li1 |
| .....gcuuuu <sup>g</sup> ggg <sup>g</sup> uaagg <sup>g</sup> cu.....                        | 3  | 0 | li1 |
| .....gcuuuu <sup>g</sup> ggg <sup>g</sup> uaagg <sup>g</sup> cuu.....                       | 1  | 0 | li1 |
| .....gcuuuu <sup>g</sup> ggg <sup>g</sup> uaagg <sup>g</sup> cuuc.....                      | 2  | 0 | li1 |
| .....gcuuuu <sup>g</sup> ggg <sup>g</sup> uaagg <sup>g</sup> cuuU.....                      | 1  | 1 | li1 |
| .....gcuuuu <sup>g</sup> ggg <sup>g</sup> Caagg <sup>g</sup> cuucc.....                     | 1  | 1 | li1 |
| .....gcuuuu <sup>g</sup> ggg <sup>g</sup> uaagg <sup>g</sup> cuucc.....                     | 13 | 0 | li1 |
| .....gcuuuu <sup>g</sup> ggg <sup>g</sup> uaagg <sup>g</sup> cuuccU.....                    | 1  | 1 | li1 |
| .....gcuuuu <sup>g</sup> ggg <sup>g</sup> uaagg <sup>g</sup> cuuccg <sup>g</sup> cu.....    | 1  | 0 | li1 |
| .....caagcccagacAgcaaaaaga.....                                                             | 1  | 1 | li1 |
| .....caagcccagaccgcaaaaagauuU.....                                                          | 1  | 1 | li1 |
| .....ccagaccgcaaaaagauu.....                                                                | 1  | 0 | li1 |
| .....gcuuuu <sup>g</sup> ggg <sup>g</sup> uaagg <sup>g</sup> c.....                         | 1  | 0 | li2 |
| .....gcuuuu <sup>g</sup> ggg <sup>g</sup> uaagg <sup>g</sup> cuu.....                       | 2  | 0 | li2 |
| .....gcuuuu <sup>g</sup> ggg <sup>g</sup> uaagg <sup>g</sup> cuuc.....                      | 1  | 1 | li2 |
| .....gcuuuu <sup>g</sup> ggg <sup>g</sup> uaagg <sup>g</sup> cuuc.....                      | 3  | 0 | li2 |
| .....gcuuuu <sup>g</sup> ggg <sup>g</sup> uaagg <sup>g</sup> cuucA.....                     | 2  | 1 | li2 |
| .....Ucuuuu <sup>g</sup> ggg <sup>g</sup> uaagg <sup>g</sup> cuucc.....                     | 1  | 1 | li2 |
| .....gcuuuu <sup>g</sup> ggg <sup>g</sup> uaagg <sup>g</sup> cuuUc.....                     | 1  | 1 | li2 |
| .....gcuuuu <sup>g</sup> ggg <sup>g</sup> uaagg <sup>g</sup> cuucc.....                     | 7  | 0 | li2 |
| .....gcuuuu <sup>g</sup> ggg <sup>g</sup> uaagg <sup>g</sup> cuucU.....                     | 1  | 1 | li2 |
| .....gcuuuu <sup>g</sup> ggg <sup>g</sup> uaagg <sup>g</sup> cuuccg.....                    | 1  | 0 | li2 |
| .....gcuuuu <sup>g</sup> ggg <sup>g</sup> uaagg <sup>g</sup> cuuccgA.....                   | 1  | 1 | li2 |
| .....caagcccagaccgcaaaaagauu.....                                                           | 1  | 0 | li2 |
| .....caagcccagaccgcaaaaagauuU.....                                                          | 2  | 1 | li2 |
| .....gcuuuu <sup>g</sup> ggg <sup>g</sup> uaagg <sup>g</sup> cuuccg <sup>g</sup> cuauC..... | 5  | 1 | pgr |
| .....caagcccagaccgcaaaaagauC.....                                                           | 1  | 1 | pgr |
| .....gcuuuu <sup>g</sup> ggg <sup>g</sup> uaagg <sup>g</sup> cuu.....                       | 1  | 0 | sg1 |
| .....gcuuuu <sup>g</sup> ggg <sup>g</sup> uaagg <sup>g</sup> cuucc.....                     | 1  | 0 | sg1 |
| .....caagcccagaccgcaaaaagauu.....                                                           | 3  | 0 | sg1 |
| .....caagcccagaccgcaaaaagau.....                                                            | 1  | 0 | bm2 |
| .....caagcccagaccgcaaaaagauu.....                                                           | 1  | 0 | Tm1 |
| .....gcuuuu <sup>g</sup> ggg <sup>g</sup> uaagg <sup>g</sup> c.....                         | 1  | 0 | c8t |
| .....gcuuuu <sup>g</sup> ggg <sup>g</sup> uaagg <sup>g</sup> cuuc.....                      | 6  | 0 | c8t |
| .....gcuuuu <sup>g</sup> ggg <sup>g</sup> uaagg <sup>g</sup> cuuccg <sup>g</sup> cu.....    | 2  | 0 | c8t |
| .....caagcccagaccgcaaaaagau.....                                                            | 1  | 0 | c8t |
| .....caagcccagaccgcaaaaagauu.....                                                           | 4  | 0 | c8t |
| .....aagcccagaccgcaaaaagau.....                                                             | 1  | 0 | c8t |
| .....aagcccagaccgcaaaaagauC.....                                                            | 1  | 1 | c8t |
| .....caagcccagaccgcaaaaaga.....                                                             | 1  | 0 | cx1 |
| .....caagcccagaccgcaaaaagau.....                                                            | 1  | 0 | br2 |



gccaccuccgcaucccagcaggagcaugcaccuuccgguuucucaagucuccuguccugcaaugccaggagacuuggcuuccggcuggagcaagcccuugcugcuuggca

|                                    |   |   |     |
|------------------------------------|---|---|-----|
| .....agacuuggcuuccggcuggagU.....   | 1 | 1 | Tm1 |
| .....agacuuggcuuccggcuggagA.....   | 1 | 1 | Tm1 |
| .....agacuuggcuuccggcuggagcU.....  | 1 | 1 | Tm1 |
| .....agacuuggcuuccggcuggagca.....  | 1 | 0 | Tm1 |
| .....agacuuggcuuccggcugga.....     | 1 | 0 | nt4 |
| .....agacuuggcuuccggcuggagc.....   | 1 | 0 | nb2 |
| .....agacuuggcuuccggcuggag.....    | 3 | 0 | cx1 |
| .....agacuuggcuuccggcuggagc.....   | 1 | 0 | cx1 |
| .....gacuuggcuuccggcuggagc.....    | 1 | 0 | cx1 |
| .....agacuuggcuuccggcuggagA.....   | 1 | 1 | br2 |
| .....accuuccgguuucuAcaagucucc..... | 1 | 1 | Am1 |

miRBase precursor : mmu\_chr2\_3012  
 Total read count : 81  
 mmu\_chr2\_3012 read count: 59  
 mmu\_chr2\_3012\* read count: 19  
 remaining reads : 3

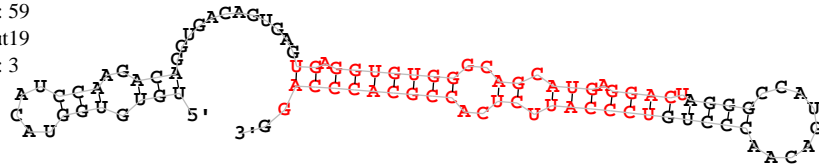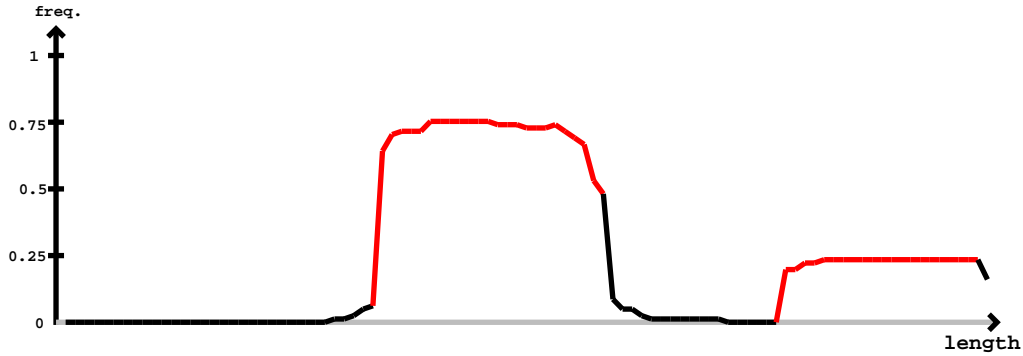

mmu\_chr2\_3012

mmu\_chr2\_3012\*

| 5' -                                                     | mmu_chr2_3012     | mmu_chr2_3012*       | -3' | exp | reads | mm | sample |
|----------------------------------------------------------|-------------------|----------------------|-----|-----|-------|----|--------|
| ugugugguacauccaagacaggugacagugagugaggugugggcagcaugaggacu | agggccaugacaaccug | ucccauucucaccgcaccag |     |     |       |    |        |
| .....                                                    | .....             | .....                |     |     | 4     | 0  | nkc    |
| .....                                                    | .....             | .....                |     |     | 1     | 0  | nkc    |
| .....                                                    | .....             | .....                |     |     | 1     | 0  | nkc    |
| .....                                                    | .....             | .....                |     |     | 1     | 0  | nkc    |
| .....                                                    | .....             | .....                |     |     | 1     | 1  | CFU    |
| .....                                                    | .....             | .....                |     |     | 1     | 1  | CFU    |
| .....                                                    | .....             | .....                |     |     | 1     | 1  | SSC    |
| .....                                                    | .....             | .....                |     |     | 1     | 0  | t11    |
| .....                                                    | .....             | .....                |     |     | 1     | 1  | t11    |
| .....                                                    | .....             | .....                |     |     | 2     | 0  | ut2    |
| .....                                                    | .....             | .....                |     |     | 1     | 0  | je1    |
| .....                                                    | .....             | .....                |     |     | 2     | 0  | gc2    |
| .....                                                    | .....             | .....                |     |     | 1     | 0  | gc2    |
| .....                                                    | .....             | .....                |     |     | 1     | 0  | h1c    |
| .....                                                    | .....             | .....                |     |     | 1     | 0  | sp2    |
| .....                                                    | .....             | .....                |     |     | 1     | 0  | sp2    |
| .....                                                    | .....             | .....                |     |     | 1     | 1  | Am2    |
| .....                                                    | .....             | .....                |     |     | 1     | 1  | Am2    |
| .....                                                    | .....             | .....                |     |     | 2     | 1  | mE8    |
| .....                                                    | .....             | .....                |     |     | 2     | 0  | mE8    |
| .....                                                    | .....             | .....                |     |     | 1     | 1  | mE8    |
| .....                                                    | .....             | .....                |     |     | 1     | 1  | mE8    |
| .....                                                    | .....             | .....                |     |     | 1     | 0  | h12    |

ugugugguacauccaagacaggugacagugagugaggugugggcagcaugaggacuagggccaugaacaaccugucccauucucaccgcaccagcag

|                                     |   |   |     |
|-------------------------------------|---|---|-----|
| .....ucccauucucaccgcaccagU          | 1 | 1 | hl2 |
| .....gaggugugggcagcaugagga.....     | 1 | 0 | c8t |
| .....ugaggugugggcUgcaugagga.....    | 1 | 1 | ut1 |
| .....gaggugugggcagcaugagga.....     | 1 | 0 | br2 |
| .....ugaggugugggcagcauga.....       | 1 | 0 | hi2 |
| .....ugaggugugggcagcaugaggacu.....  | 1 | 0 | Tm2 |
| .....ugaggugugggcagcaugagga.....    | 1 | 0 | ntr |
| .....ugaggugugggcagcaugag.....      | 1 | 0 | c4t |
| .....ucccauucucaccgcaccagU          | 1 | 1 | hr2 |
| .....ugaggugugggcagcaugagga.....    | 1 | 0 | hi1 |
| .....ugaggugugggcagcaugaggacu.....  | 1 | 0 | hi1 |
| .....ucccauucucaccgcaccagU          | 2 | 1 | hi1 |
| .....ugaggugugggcagcaugaggacu.....  | 4 | 0 | pob |
| .....ugaggugugggcagcaugaggacua..... | 1 | 0 | pob |
| .....gaggugugggcagcaugaggacua.....  | 1 | 0 | pob |
| .....ugaggugugggcagcaugaggac.....   | 1 | 0 | peb |
| .....ugaggugugggcagcaugaggacu.....  | 2 | 0 | peb |
| .....ucccauucucaccgcaccag.....      | 1 | 0 | peb |
| .....ugaggugugggcagcaugaggacu.....  | 1 | 0 | Tp1 |
| .....ucccauucucaccgcaccag.....      | 1 | 0 | bac |
| .....ugaggugugggcagcaugaggacu.....  | 1 | 0 | mE1 |
| .....ccaauucucaccgcaccagU           | 1 | 1 | mE1 |
| .....ugaggugugggcagcaugaggacu.....  | 3 | 0 | 3Ta |
| .....ucccauucucaccgcaccagA          | 1 | 1 | 3Ta |
| .....gaggugugggcagcaugaggacu.....   | 1 | 0 | sp1 |
| .....ucccauucucaccgcaccagU          | 1 | 1 | li2 |
| .....aggacuagggccaugaca.....        | 1 | 0 | li1 |
| .....ugaggugugggcagcaugaggacu.....  | 2 | 0 | imb |
| .....ucccauucucaccgcaccag.....      | 1 | 0 | imb |
| .....ugaggugugggcagcaugagga.....    | 1 | 0 | sg1 |
| .....ugaggugugggcagcaugaggacua..... | 1 | 0 | sg1 |
| .....ucccauucucaccgcaccag.....      | 2 | 0 | sg1 |
| .....ugaggugugggcagcauga.....       | 1 | 0 | th2 |
| .....ugaggugugggcagcaugagg.....     | 1 | 0 | th2 |
| .....gaggugugggcagcaugagg.....      | 1 | 0 | th2 |
| .....ucccauucucaccgcaccagU          | 1 | 1 | Tm1 |
| .....ugaggugugggcagcaugaggacu.....  | 2 | 0 | nt4 |
| .....ugaggugugggcagcaugag.....      | 1 | 0 | th7 |
| .....ugaggugugggcagcaugaggac.....   | 1 | 0 | th7 |
| .....ugaggugugggcagcaugaggacu.....  | 1 | 0 | cx1 |
| .....ucccauucucaccgcaccagU          | 1 | 1 | cx1 |

Provisional ID : chr2\_3037  
 Score total : 46  
 Score for star read(s) : 3.9  
 Score for read counts : 38.9  
 Score for mfe : 2.2  
 Score for randfold : 1.6  
 Score for cons. seed : -0.6  
 Total read count : 88  
 Mature read count : 60  
 Loop read count : 0  
 Star read count : 28

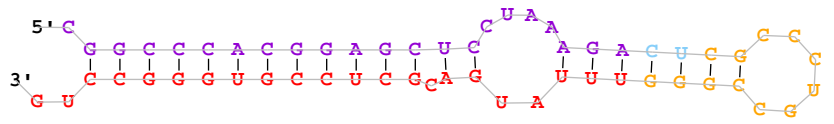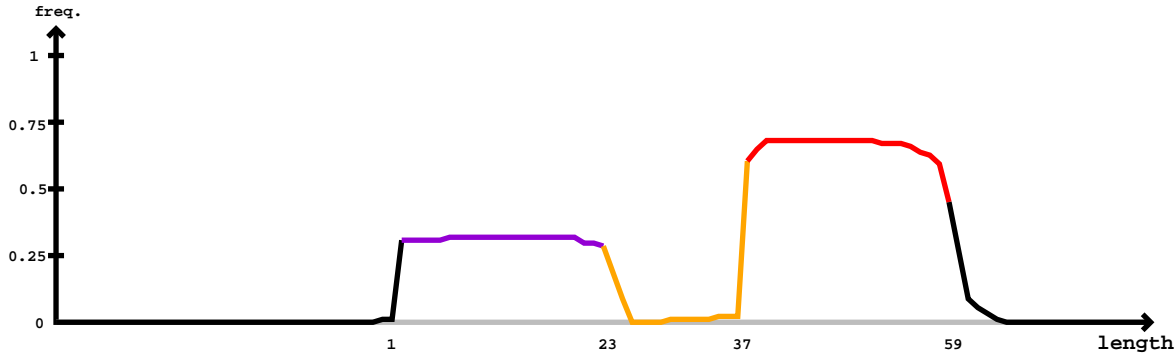

**Star**

**Mature**

| 5'                                 | Star                       | Mature                            | 3'                 | obs | mm | sample |
|------------------------------------|----------------------------|-----------------------------------|--------------------|-----|----|--------|
| guguguggaucugcgacuccuccacuucgcccug | cgccacggagcuccuaaaga       | cugcccgccgguuuauagcgcuccguggccug  | caaggagggguuccugcc | 1   | 0  | nkc    |
| guguguggaucugcgacuccuccacuucgcccug | ggccacggagcuccuaaagacu     | cgcuccgcccgguuuauagcgcuccguggccug | caaggagggguuccugcc | 1   | 0  | nkc    |
| .....(((((((((.....))))))))).....  | ugcggcccacggagcuccuaaagacu | .....                             | .....              | 1   | 0  | nkc    |
| .....                              | cgccacggagcuccuaa          | .....                             | .....              | 1   | 0  | nkc    |
| .....                              | cgccacggagcuccuaaaga       | .....                             | .....              | 1   | 0  | nkc    |
| .....                              | cgccacggagcuccuaaagac      | .....                             | .....              | 1   | 0  | nkc    |
| .....                              | cgccacggagcuccuaaagacu     | .....                             | .....              | 2   | 0  | nkc    |
| .....                              | .....                      | uuuauagcgcuccguggccug             | .....              | 2   | 0  | nkc    |
| .....                              | .....                      | uuuauagcgcuccguggccug             | .....              | 1   | 0  | nkc    |
| .....                              | .....                      | uuuauagcgcuccguggccug             | .....              | 1   | 1  | 3T3    |
| .....                              | .....                      | uuuauagcgcuccguggccug             | .....              | 9   | 0  | 3T3    |
| .....                              | .....                      | uuuauagcgcuccguggccugA            | .....              | 1   | 1  | ay3    |
| .....                              | .....                      | uuuauagcgcuccguggccugAaa          | .....              | 1   | 1  | ay3    |
| .....                              | .....                      | cugccgguuuauagCgcuccg             | .....              | 1   | 1  | CFU    |
| .....                              | .....                      | uuuauagcgcuccguggg                | .....              | 1   | 0  | CFU    |
| .....                              | .....                      | uuuauagcgcuccguggccu              | .....              | 1   | 0  | 48t    |
| .....                              | .....                      | uuuauagcgcuccguggccug             | .....              | 1   | 0  | 48t    |
| .....                              | cgccacggagcuccuaaagacu     | .....                             | .....              | 1   | 0  | SSC    |
| .....                              | cgccacggagcuccuaaagac      | .....                             | .....              | 1   | 0  | gcb    |
| .....                              | .....                      | uuuauagcgcuccguggccug             | .....              | 2   | 0  | gc2    |
| .....                              | .....                      | uuuauagcgcuccguggccu              | .....              | 1   | 0  | pe1    |
| .....                              | .....                      | ggguuuauagcgcuccgugg              | .....              | 1   | 0  | kdn    |
| .....                              | cgccacggagcuccuaaaga       | .....                             | .....              | 1   | 0  | h1c    |
| .....                              | .....                      | uuuauagcgcuccguggccu              | .....              | 2   | 0  | mus    |



Star

Mature

guguguggaucugcgacuccaccuuccgcccugcggccacaggagcuccuaaagacucgcccugccggguuuuugacgcuccgugggccugcaaggagggguucccugcc

|                                      |   |   |     |
|--------------------------------------|---|---|-----|
| .....uuuugacgcuccgugggcc.....        | 1 | 0 | skn |
| .....uuuugacgcuccgugggccu.....       | 2 | 0 | skn |
| .....cggccacaggagcuccuaagU.....      | 1 | 1 | em2 |
| .....cggccacaggagcuccuaa.....        | 1 | 0 | mE8 |
| .....cggccacaggagcuccuaaaga.....     | 1 | 0 | mE8 |
| .....cggccacaggagcuccuaaagac.....    | 1 | 0 | mE8 |
| .....uuuugacgcuccgugggccug.....      | 1 | 0 | mE8 |
| .....uuuugacgcuccgugggccugU.....     | 1 | 1 | mE8 |
| .....cggccacaggagcuccuaaagac.....    | 1 | 0 | h12 |
| .....uuuugacgcuccgugggccug.....      | 1 | 0 | ay1 |
| .....uuuugacgcuccgugggccugAaa.....   | 1 | 1 | ay1 |
| .....cggccacaggagcuccuaaag.....      | 1 | 0 | Tm2 |
| .....uuuugacgcuccgugggccugA.....     | 1 | 1 | Tm2 |
| .....cacggagcuccuaaagaA.....         | 1 | 1 | hi2 |
| .....uuuugacgcuccgugggcc.....        | 1 | 0 | ntr |
| .....uuuugacgcuccgugggccu.....       | 1 | 0 | ntr |
| .....uuuugacgcuccgugggccugU.....     | 1 | 1 | mm2 |
| .....cggccacaggagcuccuaaagac.....    | 1 | 0 | c4t |
| .....uuuugacgcuccgugggcc.....        | 1 | 0 | c4t |
| .....uuuugacgcuccgugggccu.....       | 1 | 0 | c4t |
| .....uuuugacgcuccguggg.....          | 1 | 0 | ay2 |
| .....uuuugacgcuccgugggccu.....       | 1 | 0 | Tp2 |
| .....uuuugacgcuccgugggccugA.....     | 1 | 1 | Tp2 |
| .....uuuugacgcuccgugggccugcaagg..... | 1 | 0 | Tp2 |
| .....cggccacaggagcuccuaaagac.....    | 1 | 0 | peb |
| .....uuuugacgcuccgugggccug.....      | 1 | 0 | bac |
| .....cggccacaggagcuccuaaaga.....     | 6 | 0 | 3Ta |
| .....uuuugacgcuccgugggccugA.....     | 1 | 1 | 3Ta |
| .....uuuugacgcuccgugggccugc.....     | 2 | 0 | li2 |
| .....uuuugacgcuccgugggccugcaaU.....  | 1 | 1 | li2 |
| .....uuuugacgcuccgugggccugU.....     | 1 | 1 | li1 |
| .....uuuugacgcuccgugggccugcaaA.....  | 1 | 1 | li1 |
| .....uuuugacgcuccgugggccugcU.....    | 1 | 1 | li1 |
| .....uuuugacgcuccgugggccugAa.....    | 1 | 1 | li1 |
| .....cggccacaggagcuccuaaagacu.....   | 1 | 0 | th2 |
| .....uuuugacgcuccgugggcc.....        | 1 | 0 | th2 |
| .....uuuugacgcuccgugggccu.....       | 2 | 0 | th2 |
| .....uuuugacgcuccgugggccug.....      | 1 | 0 | th2 |
| .....uuuugacgcuccgugggccu.....       | 1 | 0 | th2 |
| .....cggccacaggagcuccuaaagacu.....   | 1 | 0 | sg1 |
| .....uuuugacgcuccgugggccug.....      | 1 | 0 | nt4 |
| .....cggccacaggagcuccuaaagacu.....   | 1 | 0 | Tm1 |
| .....uuuugacgcuccgugggccugU.....     | 1 | 1 | Tm1 |
| .....uuuugacgcuccgugggccugc.....     | 2 | 0 | Tm1 |
| .....uuuugacgcuccgugggccugUa.....    | 1 | 1 | Tm1 |
| .....cggccacaggagcuccuaaaga.....     | 1 | 0 | em3 |
| .....cggccacaggagcuccuaaagacu.....   | 1 | 0 | th7 |

Star

Mature

guguguggaucugcgacuccuccacuuccgccugggcccacggagcuccaaagacucgcccugccggguuuuugacgcuccgugggccugcaaggagggguuccugcc

.....uuuugacgcuccgugggccu.....

1

0

not

Provisional ID : chr2\_3125  
 Score total : 24  
 Score for star read(s) : 3.9  
 Score for read counts : 17.5  
 Score for mfe : 1.6  
 Score for randfold : 1.6  
 Score for cons. seed : -0.6  
 Total read count : 46  
 Mature read count : 40  
 Loop read count : 0  
 Star read count : 6

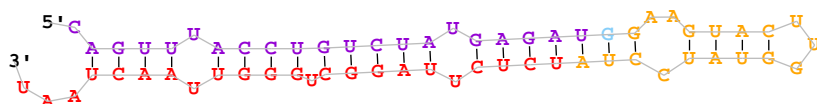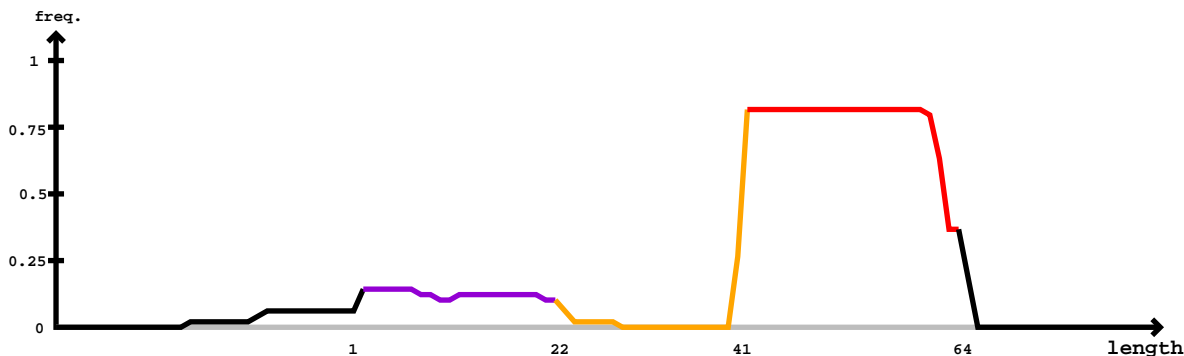

**Star**

**Mature**

| 5' -                                                                            | -3'     | obs                                                     | exp | reads | mm | sample |
|---------------------------------------------------------------------------------|---------|---------------------------------------------------------|-----|-------|----|--------|
| uagguucugcgcuuuugcucucugagccu.caguuuaccugucuaugagau                             | ggaagua | cuugguauccuaucucuuaggcuggguuaacuaauggcuaagcagugcugacacu |     |       |    |        |
| uagguucugcgcuuuugcucucugagccu.caguuuaccugucuaugagau                             | ggaagua | cuugguauccuaucucuuaggcuggguuaacuaauggcuaagcagugcugacacu |     |       |    |        |
| .....(((.....)).....(((.....(((.....(((.....(((.....(((.....))))))))))))))..... |         |                                                         |     |       |    |        |
| .....ucucuuaggcuggguuaacu.....                                                  |         |                                                         |     | 1     | 0  | 3T3    |
| .....ucucuuaggcuggguuaacuaau.....                                               |         |                                                         |     | 1     | 0  | 3T3    |
| .....caguuuaccugucuaugag.....                                                   |         |                                                         |     | 1     | 0  | hi2    |
| .....ucucuuaggcuggguuaacuaau.....                                               |         |                                                         |     | 1     | 0  | hi2    |
| .....ucucuuaggcuggguuaacuaau.....                                               |         |                                                         |     | 1     | 0  | nkc    |
| .....ucucuuaggcuggguuaac.....                                                   |         |                                                         |     | 1     | 0  | ntr    |
| .....aucucuuaggcuggguuaacua.....                                                |         |                                                         |     | 11    | 0  | 3T3    |
| .....aucucuuaggcuggguuaaAua.....                                                |         |                                                         |     | 1     | 1  | 3T3    |
| .....ucucuuaggcuggguuaacu.....                                                  |         |                                                         |     | 6     | 0  | 3T3    |
| .....ucucuuaggcuggguuaacuaau.....                                               |         |                                                         |     | 13    | 0  | 3T3    |
| .....cucGagccucaguuuac.....                                                     |         |                                                         |     | 1     | 1  | li2    |
| .....guGuauagagauggaagu.....                                                    |         |                                                         |     | 1     | 1  | li2    |
| .....ucucuuaggcuggguuaacu.....                                                  |         |                                                         |     | 1     | 0  | bm2    |
| .....ucucuuaggcuggguuaacua.....                                                 |         |                                                         |     | 1     | 0  | bm2    |
| .....ucucuuaggcuggguuaacuaau.....                                               |         |                                                         |     | 1     | 1  | Tm1    |
| .....cuuuugcucucugagUcu.....                                                    |         |                                                         |     | 1     | 1  | hi1    |
| .....caguuuaccugucuaugagau.....                                                 |         |                                                         |     | 2     | 0  | hi1    |
| .....caguuuaccugucuaugagaug.....                                                |         |                                                         |     | 1     | 0  | hi1    |
| .....ucucuuaggcuggguuaacuaau.....                                               |         |                                                         |     | 1     | 0  | hi1    |
| .....caguuuaccugucuaugagau.....                                                 |         |                                                         |     | 1     | 0  | cx1    |
| .....ucucugagccuGaguuu.....                                                     |         |                                                         |     | 1     | 1  | mE1    |

Provisional ID : chr2\_3181  
 Score total : 59.9  
 Score for star read(s) : 3.9  
 Score for read counts : 53.7  
 Score for mfe : 1.5  
 Score for randfold : -2.2  
 Score for cons. seed : 3  
 Total read count : 117  
 Mature read count : 100  
 Loop read count : 0  
 Star read count : 17

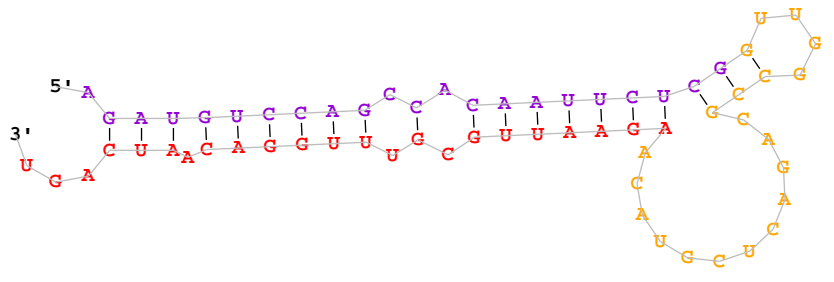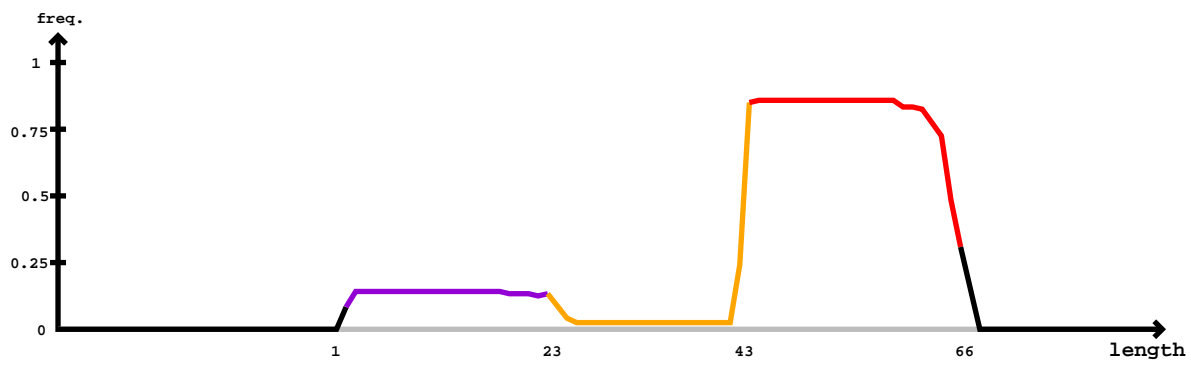

**Star** **Mature**

| 5' -                                                                                                              | 3' -                                                                                                              | obs | exp | reads | mm | sample |
|-------------------------------------------------------------------------------------------------------------------|-------------------------------------------------------------------------------------------------------------------|-----|-----|-------|----|--------|
| gucucuguagagcccggagcucaaccacagauguccagccacaauucucgguuggccgcagacucguacaagaauugcgguuggacaauucaguggcgaagcccugaguucag | gucucuguagagcccggagcucaaccacagauguccagccacaauucucgguuggccgcagacucguacaagaauugcgguuggacaauucaguggcgaagcccugaguucag |     |     | 3     | 0  | E15    |
| .....(((((((.....(((((((.....(((((((.....))))))))))))))))))))))))))))))))))))))))))))))))))))))))))))             | .....(((((.....(((((((.....(((((((.....))))))))))))))))))))))))))))))))))))))))))))))))))))))))))))               |     |     | 1     | 0  | nkc    |
| .....agaauugcgguuggacaauucagU.....                                                                                | .....agaauugcgguuggacaauucag.....                                                                                 |     |     | 2     | 0  | nkc    |
| .....agaauugcgguuggacaauucag.....                                                                                 | .....agaauugcgguuggacaauucag.....                                                                                 |     |     | 2     | 0  | nkc    |
| .....agaauugcgguuggacaauucag.....                                                                                 | .....agaauugcgguuggacaauucag.....                                                                                 |     |     | 1     | 0  | nkc    |
| .....agaauugcgguuggacaauucagU.....                                                                                | .....agaauugcgguuggacaauucagU.....                                                                                |     |     | 1     | 1  | ay3    |
| .....agaauugcgguuggacaauucag.....                                                                                 | .....agaauugcgguuggacaauucag.....                                                                                 |     |     | 1     | 0  | mdc    |
| .....agaauugcgguuggacaauucag.....                                                                                 | .....agaauugcgguuggacaauucag.....                                                                                 |     |     | 1     | 0  | mdc    |
| .....agaauugcgguuggacaauucag.....                                                                                 | .....agaauugcgguuggacaauucag.....                                                                                 |     |     | 1     | 0  | mdc    |
| .....agaauugcgguuggacaauucag.....                                                                                 | .....agaauugcgguuggacaauucag.....                                                                                 |     |     | 1     | 0  | mdc    |
| .....agauguccagccacaauucuc.....                                                                                   | .....agauguccagccacaauucuc.....                                                                                   |     |     | 1     | 0  | CFU    |
| .....gauguccagccacaauucuc.....                                                                                    | .....gauguccagccacaauucuc.....                                                                                    |     |     | 1     | 0  | CFU    |
| .....gauguccagccacaauucucg.....                                                                                   | .....gauguccagccacaauucucg.....                                                                                   |     |     | 1     | 0  | CFU    |
| .....gCuguccagccacaauucucggu.....                                                                                 | .....gCuguccagccacaauucucggu.....                                                                                 |     |     | 1     | 1  | CFU    |
| .....agaauugcgguuggacaauucag.....                                                                                 | .....agaauugcgguuggacaauucag.....                                                                                 |     |     | 1     | 0  | 48t    |
| .....agaauugcgguuggacaauucag.....                                                                                 | .....agaauugcgguuggacaauucag.....                                                                                 |     |     | 1     | 0  | 48t    |
| .....agaauugcgguuggacaauucag.....                                                                                 | .....agaauugcgguuggacaauucag.....                                                                                 |     |     | 1     | 0  | 1un    |
| .....agaauugcgguuggacaauucag.....                                                                                 | .....agaauugcgguuggacaauucag.....                                                                                 |     |     | 1     | 0  | ut2    |
| .....agaauugcgguuggacaauucag.....                                                                                 | .....agaauugcgguuggacaauucag.....                                                                                 |     |     | 1     | 0  | ut2    |
| .....agaauugcgguuggacaauucag.....                                                                                 | .....agaauugcgguuggacaauucag.....                                                                                 |     |     | 1     | 0  | je1    |
| .....agaauugcgguuggacaauucag.....                                                                                 | .....agaauugcgguuggacaauucag.....                                                                                 |     |     | 1     | 0  | gc2    |
| .....agaauugcgguuggacaauucag.....                                                                                 | .....agaauugcgguuggacaauucag.....                                                                                 |     |     | 2     | 0  | gc2    |
| .....agaauugcgguuggacaauucag.....                                                                                 | .....agaauugcgguuggacaauucag.....                                                                                 |     |     | 1     | 0  | sp2    |

Star

Mature

|                                                                                                                  |   |   |     |
|------------------------------------------------------------------------------------------------------------------|---|---|-----|
| gucucuguagagcccggagcuaaccacagauguccagccacaauucucgguuggccgcagacucguacaagaaugcgguuggacaauucaguggcgaagcccucgaguucag |   |   |     |
| ..... agaaugcgguuggacaauucag.....                                                                                | 3 | 0 | sp2 |
| ..... agauguccagccacaauucucg.....                                                                                | 1 | 0 | h1c |
| ..... aagaauugcgguuggacaauca.....                                                                                | 1 | 0 | h1c |
| ..... agaaugcgguuggacaaa.....                                                                                    | 2 | 1 | h1c |
| ..... agauguccagccacCauucucg.....                                                                                | 1 | 1 | h11 |
| ..... agauguccagccacaauucucg.....                                                                                | 2 | 0 | h11 |
| ..... agaaugcgguuggacaauca.....                                                                                  | 1 | 0 | h11 |
| ..... agaaugcgguuggacaauucag.....                                                                                | 1 | 0 | mus |
| ..... agaaugcgguuggacaauucag.....                                                                                | 1 | 0 | skn |
| ..... agaaugcgguuggacaauucag.....                                                                                | 1 | 0 | nt2 |
| ..... agaaugcgguuggacaauucag.....                                                                                | 1 | 0 | nt2 |
| ..... gaaugcgguuggacaauucag.....                                                                                 | 1 | 0 | nt2 |
| ..... agaaugcgguuggacaauucag.....                                                                                | 1 | 0 | itr |
| ..... agauguccagccacaau.....                                                                                     | 1 | 0 | em2 |
| ..... agaaugcgguuggacaauucag.....                                                                                | 1 | 0 | em2 |
| ..... aagaauugcgguuggacaauca.....                                                                                | 1 | 0 | bm2 |
| ..... aagaauugcgguuggacaauca.....                                                                                | 1 | 0 | bm2 |
| ..... aagaauugUguuggacaauca.....                                                                                 | 1 | 1 | h12 |
| ..... agaaugcgguuggacaauca.....                                                                                  | 1 | 0 | h12 |
| ..... aagaauugcgguuggacaauca.....                                                                                | 1 | 0 | je2 |
| ..... agaaugcgguuggacaauuc.....                                                                                  | 1 | 0 | je2 |
| ..... agaaugcgguuggacaauucag.....                                                                                | 1 | 0 | ut1 |
| ..... gauguccagccacaauucucggu.....                                                                               | 1 | 0 | Tm2 |
| ..... aagaauugcgguuggacaau.....                                                                                  | 1 | 0 | hi2 |
| ..... agaaugcgguuggacaauucag.....                                                                                | 1 | 0 | nt1 |
| ..... agauguccagccacaauucucg.....                                                                                | 1 | 0 | c4t |
| ..... aagaauugcgguuggacaauca.....                                                                                | 1 | 0 | c4t |
| ..... aagaauugcgguuggacaauucag.....                                                                              | 2 | 0 | c4t |
| ..... agaaugcgguuggacaauuc.....                                                                                  | 1 | 0 | c4t |
| ..... aagaauugcgguuggacaauca.....                                                                                | 2 | 0 | c4t |
| ..... agaaugcgguuggacaauucag.....                                                                                | 3 | 0 | c4t |
| ..... agaaugcgguuggacaauucag.....                                                                                | 2 | 0 | c4t |
| ..... aagaauugcgguuggacaauucagA.....                                                                             | 1 | 1 | ay2 |
| ..... agaaugcgguuggacaauucag.....                                                                                | 1 | 0 | ay2 |
| ..... agaaugcgguuggacaauucag.....                                                                                | 2 | 0 | Tp2 |
| ..... agaaugcgguuggacaauucag.....                                                                                | 2 | 0 | pob |
| ..... agaaugcgguuggacaauucag.....                                                                                | 3 | 0 | pob |
| ..... gauguccagccacaauucucg.....                                                                                 | 1 | 0 | hi1 |
| ..... agaaugcgguuggacaauucag.....                                                                                | 1 | 0 | peb |
| ..... aagaauugcgguuggacaauuc.....                                                                                | 1 | 0 | bac |
| ..... agaaugcgguuggacaauucag.....                                                                                | 1 | 0 | bac |
| ..... agaaugcgguuggacaauucag.....                                                                                | 1 | 0 | bac |
| ..... agaaugcgguuggacaauucag.....                                                                                | 1 | 0 | mbm |
| ..... agaaugcgguuggacaauucag.....                                                                                | 1 | 0 | mbm |
| ..... agaaugcgguuggacaauucag.....                                                                                | 3 | 0 | 3Ta |
| ..... aagaauugcgguuggacaau.....                                                                                  | 1 | 0 | sp1 |

Star

Mature

|                             |                       |                     |                       |                      |   |   |     |
|-----------------------------|-----------------------|---------------------|-----------------------|----------------------|---|---|-----|
| gucucuguagagcccggagcuaaccac | agauguccagccacaauucug | gguggccgagacucguaca | agaauugcguuuggacaauca | aggcgaagcccugaguucag |   |   |     |
| .....                       | .....                 | .....               | .....                 | .....                | 1 | 0 | sp1 |
| .....                       | .....                 | .....               | .....                 | .....                | 3 | 0 | sp1 |
| .....                       | .....                 | .....               | .....                 | .....                | 1 | 0 | sp1 |
| .....                       | .....                 | .....               | .....                 | .....                | 3 | 0 | sp1 |
| .....                       | .....                 | .....               | .....                 | .....                | 1 | 1 | li1 |
| .....                       | .....                 | .....               | .....                 | .....                | 1 | 0 | li2 |
| .....                       | .....                 | .....               | .....                 | .....                | 1 | 0 | imb |
| .....                       | .....                 | .....               | .....                 | .....                | 1 | 0 | imb |
| .....                       | .....                 | .....               | .....                 | .....                | 1 | 0 | bm1 |
| .....                       | .....                 | .....               | .....                 | .....                | 2 | 0 | bm1 |
| .....                       | .....                 | .....               | .....                 | .....                | 1 | 0 | th2 |
| .....                       | .....                 | .....               | .....                 | .....                | 1 | 0 | th2 |
| .....                       | .....                 | .....               | .....                 | .....                | 1 | 0 | th2 |
| .....                       | .....                 | .....               | .....                 | .....                | 1 | 0 | sg1 |
| .....                       | .....                 | .....               | .....                 | .....                | 1 | 0 | Tm1 |
| .....                       | .....                 | .....               | .....                 | .....                | 1 | 0 | Tm1 |
| .....                       | .....                 | .....               | .....                 | .....                | 1 | 0 | th7 |
| .....                       | .....                 | .....               | .....                 | .....                | 1 | 0 | th7 |
| .....                       | .....                 | .....               | .....                 | .....                | 2 | 0 | th7 |
| .....                       | .....                 | .....               | .....                 | .....                | 1 | 0 | nct |
| .....                       | .....                 | .....               | .....                 | .....                | 1 | 0 | cx1 |
| .....                       | .....                 | .....               | .....                 | .....                | 1 | 0 | Am1 |
| .....                       | .....                 | .....               | .....                 | .....                | 3 | 0 | Am1 |



Star

Mature

|                     |                                                                                            |    |   |     |
|---------------------|--------------------------------------------------------------------------------------------|----|---|-----|
| cgagcgcgccuccgcgaau | gcuuuuugggguaagggcuuccggcuauugaguuauguacagcaagcccagaccgcaaaaagauucgcaaaggcagucuaaccgcuucuu |    |   |     |
| .....               | .....agcccagaccgcaaaaagau.....                                                             | 1  | 0 | nt2 |
| .....               | .....agcccagaccgcaaaaagau.....                                                             | 2  | 0 | nt2 |
| .....               | .....augcuuuugggguaagggcuu.....                                                            | 1  | 0 | skn |
| .....               | .....gcuuuuugggguaagggcuucc.....                                                           | 1  | 0 | skn |
| .....               | .....aagcccagaccgcaaaaagau.....                                                            | 1  | 0 | skn |
| .....               | .....augcuuuugggguaagggcuuU.....                                                           | 1  | 1 | li1 |
| .....               | .....gcuuuuugggguaagggc.....                                                               | 3  | 0 | li1 |
| .....               | .....gcuuuuugggguaagggcu.....                                                              | 3  | 0 | li1 |
| .....               | .....gcuuuuugggguaagggcuu.....                                                             | 1  | 0 | li1 |
| .....               | .....gcuuuuugggguaagggcuuU.....                                                            | 1  | 1 | li1 |
| .....               | .....gcuuuuugggguaagggcuucc.....                                                           | 2  | 0 | li1 |
| .....               | .....gcuuuuuggggCaagggcuucc.....                                                           | 1  | 1 | li1 |
| .....               | .....gcuuuuugggguaagggcuucc.....                                                           | 13 | 0 | li1 |
| .....               | .....gcuuuuugggguaagggcuuccU.....                                                          | 1  | 1 | li1 |
| .....               | .....gcuuuuugggguaagggcuuccggcu.....                                                       | 1  | 0 | li1 |
| .....               | .....caagcccagaccgcaaaaaga.....                                                            | 1  | 1 | li1 |
| .....               | .....caagcccagaccgcaaaaagauU.....                                                          | 1  | 1 | li1 |
| .....               | .....ccagaccgcaaaaagau.....                                                                | 1  | 0 | li1 |
| .....               | .....gcuuuuugggguaagggc.....                                                               | 1  | 0 | li2 |
| .....               | .....gcuuuuugggguaagggcuu.....                                                             | 2  | 0 | li2 |
| .....               | .....gcuuuuugggguaagggcuucc.....                                                           | 3  | 0 | li2 |
| .....               | .....gcuuuuUggguaagggcuucc.....                                                            | 1  | 1 | li2 |
| .....               | .....gcuuuuugggguaagggcuucc.....                                                           | 7  | 0 | li2 |
| .....               | .....gcuuuuugggguaagggcuuccU.....                                                          | 1  | 1 | li2 |
| .....               | .....Ucuuuuugggguaagggcuucc.....                                                           | 1  | 1 | li2 |
| .....               | .....gcuuuuugggguaagggcuuUc.....                                                           | 1  | 1 | li2 |
| .....               | .....gcuuuuugggguaagggcuuccA.....                                                          | 2  | 1 | li2 |
| .....               | .....gcuuuuugggguaagggcuuccg.....                                                          | 1  | 0 | li2 |
| .....               | .....gcuuuuugggguaagggcuuccgA.....                                                         | 1  | 1 | li2 |
| .....               | .....caagcccagaccgcaaaaagau.....                                                           | 1  | 0 | li2 |
| .....               | .....caagcccagaccgcaaaaagauU.....                                                          | 2  | 1 | li2 |
| .....               | .....gcuuuuugggguaagggcuuccggcuauC.....                                                    | 5  | 1 | pgr |
| .....               | .....gcuuuuugggguaagggcuu.....                                                             | 1  | 0 | sg1 |
| .....               | .....gcuuuuugggguaagggcuucc.....                                                           | 1  | 0 | sg1 |
| .....               | .....caagcccagaccgcaaaaagau.....                                                           | 3  | 0 | sg1 |
| .....               | .....caagcccagaccgcaaaaagau.....                                                           | 1  | 0 | bm2 |
| .....               | .....caagcccagaccgcaaaaagau.....                                                           | 1  | 0 | Tm1 |
| .....               | .....gcuuuuugggguaagggc.....                                                               | 1  | 0 | c8t |
| .....               | .....gcuuuuugggguaagggcuucc.....                                                           | 6  | 0 | c8t |
| .....               | .....gcuuuuugggguaagggcuuccggcu.....                                                       | 2  | 0 | c8t |
| .....               | .....caagcccagaccgcaaaaagau.....                                                           | 1  | 0 | c8t |
| .....               | .....caagcccagaccgcaaaaagau.....                                                           | 4  | 0 | c8t |
| .....               | .....aagcccagaccgcaaaaagau.....                                                            | 1  | 0 | c8t |
| .....               | .....caagcccagaccgcaaaaaga.....                                                            | 1  | 0 | cx1 |
| .....               | .....caagcccagaccgcaaaaagau.....                                                           | 1  | 0 | br2 |



Provisional ID : chr2\_4218  
 Score total : 23.7  
 Score for star read(s) : 3.9  
 Score for read counts : 17  
 Score for mfe : 1.8  
 Score for randfold : 1.6  
 Score for cons. seed : -0.6  
 Total read count : 45  
 Mature read count : 43  
 Loop read count : 0  
 Star read count : 2

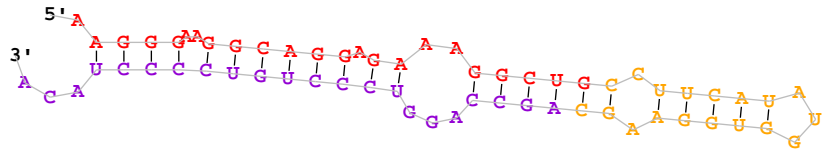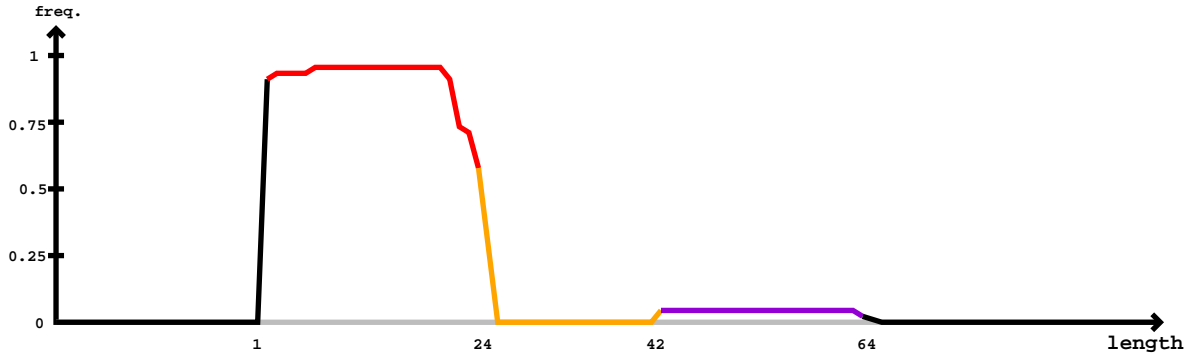

**Mature**

**Star**

| 5'                                                                                                                                         | obs   | mm | sample |
|--------------------------------------------------------------------------------------------------------------------------------------------|-------|----|--------|
| guagcuccauuggggaaaaa <b>aagggaaagcaggagaaaaggcug</b> ccuuc <u>cau</u> uggggaagcagccagguccuguccc <u>cuac</u> gccagugaugggcaagugcgaaugaucagc | reads | mm | sample |
| guagcuccauuggggaaaaa <b>aagggaaagcaggagaaaaggcug</b> ccuuc <u>cau</u> uggggaagcagccagguccuguccc <u>cuac</u> gccagugaugggcaagugcgaaugaucagc | 1     | 1  | E15    |
| ..... <b>aagggaaagcaggagaaaaggcUG</b> .....                                                                                                | 2     | 0  | hi2    |
| ..... <b>aagggaaagcaggagaaaagg</b> .....                                                                                                   | 1     | 0  | hi2    |
| ..... <b>aagggaaagcaggagaaaag</b> .....                                                                                                    | 1     | 0  | Tm2    |
| ..... <b>aagggaaagcaggagaaaagg</b> .....                                                                                                   | 1     | 1  | Tm2    |
| ..... <b>aagggaaagcaggagaaaaggcug</b> .....                                                                                                | 1     | 0  | Tm2    |
| ..... <b>agccagguccuguccc<u>cuac</u></b> .....                                                                                             | 1     | 0  | Tm2    |
| ..... <b>aagggaaagcaggagaaaaggcug</b> .....                                                                                                | 1     | 0  | nkc    |
| ..... <b>agggaaagcaggagaaaaggcug</b> .....                                                                                                 | 1     | 0  | ntr    |
| ..... <b>aagggaaagcaggagaaaaggcug</b> .....                                                                                                | 1     | 0  | mdc    |
| ..... <b>aagggaaagcaggagaaaaggc</b> .....                                                                                                  | 1     | 0  | CFU    |
| ..... <b>aagggaaagcaggagaaaaggcug</b> .....                                                                                                | 1     | 0  | mzb    |
| ..... <b>aagggaaagcaggagaaaaggcug</b> .....                                                                                                | 1     | 0  | c4t    |
| ..... <b>aagggaaagcaggagaaaagg</b> .....                                                                                                   | 1     | 0  | hi1    |
| ..... <b>aagggaaagcaggagaaaagg</b> .....                                                                                                   | 1     | 0  | pob    |
| ..... <b>aagggaaagcaggagaaaaggcug</b> .....                                                                                                | 5     | 0  | pob    |
| ..... <b>aagggaaagcaggagaaaaggcug</b> .....                                                                                                | 1     | 0  | kdn    |
| ..... <b>aagggaaagcaggagaaaaggcug</b> .....                                                                                                | 1     | 0  | kdn    |
| ..... <b>aagggaaagcaggagaaaaggcug</b> .....                                                                                                | 3     | 0  | sp2    |
| ..... <b>aagggaaagcaggagaaaaggcug</b> .....                                                                                                | 1     | 0  | sp2    |
| ..... <b>aagccaggagaaCggcu</b> .....                                                                                                       | 1     | 1  | ool    |

Mature

Star

guagcuccauugggaaaaauaaggggaaggcaggagaaaaggcugccuucuaugggugaagcagccaggucccugucccuacagccagugauggggcaagugcgaaugaucagc

|                                      |   |   |     |
|--------------------------------------|---|---|-----|
| .....aaggggaaggcaggagaaaaggcug.....  | 1 | 0 | sp1 |
| .....aaggggaaggcaggagaaaaggcug.....  | 1 | 0 | skn |
| .....aaggggaaggcaggagagaCag.....     | 1 | 1 | bm1 |
| .....aaggggaaggcaggagaaaaggcug.....  | 1 | 0 | bm1 |
| .....aaggggaaggcaggagaaaaggcug.....  | 1 | 0 | th2 |
| .....aaggggaaggcaggagaaaaggcug.....  | 1 | 0 | th2 |
| .....aaggggaaggcaggagaaaaggcug.....  | 1 | 0 | mE8 |
| .....agccaggucccugucccuaca.....      | 1 | 0 | mE8 |
| .....aaggggaaggcaggagaaaagg.....     | 1 | 0 | nt4 |
| .....aaggggaaggcaggagaaaagg.....     | 1 | 0 | Tm1 |
| .....aaggggaaggcaggagaaaaggcug.....  | 1 | 0 | Tm1 |
| .....aaggggaaggcaggagaaaaggcugA..... | 1 | 1 | Tm1 |
| .....aaggggaaggcaggagaaaagg.....     | 1 | 0 | th7 |
| .....aaggggaaggcaggagaaaaggcug.....  | 3 | 0 | th7 |
| .....aaggggaaggcaggagaaaaggcug.....  | 1 | 0 | cx1 |

Provisional ID : chr2\_6270  
 Score total : 13.2  
 Score for star read(s) : 3.9  
 Score for read counts : 12.4  
 Score for mfe : -0.2  
 Score for randfold : -2.2  
 Score for cons. seed : -0.6  
 Total read count : 36  
 Mature read count : 29  
 Loop read count : 0  
 Star read count : 7

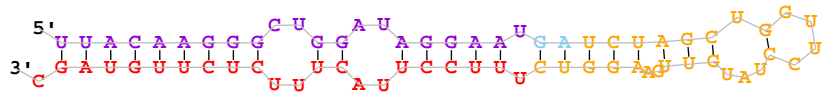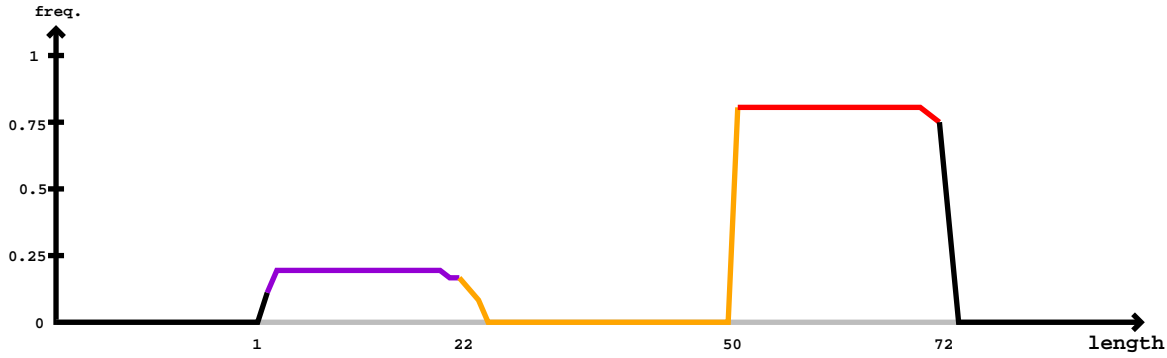

**Star**

**Mature**

| 5' -                                      |                                                    | -3'                  | obs | exp | reads | mm | sample |
|-------------------------------------------|----------------------------------------------------|----------------------|-----|-----|-------|----|--------|
| accguucucagcaugcucccuuacaagggcuggauaggaau | gaucuagcugguuccuauuguugaaggucuuuccuuacuucucuuguagc | cugaucccugacauuggcgc |     |     |       |    |        |
| accguucucagcaugcucccuuacaagggcuggauaggaau | ucuagcugguuccuauuguugaaggucuuuccuuacuucucuuguagc   | cugaucccugacauuggcgc |     |     |       |    |        |
| .....uuacaagggcuggauaggaau.....           |                                                    |                      | 3   | 0   | 3     | 0  | 3Ta    |
| .....uacaagggcuggauaggaau.....            |                                                    |                      | 2   | 0   | 2     | 0  | 3Ta    |
| .....uuuccuuacuucucuuguagU.....           |                                                    |                      | 8   | 1   | 8     | 1  | 3Ta    |
| .....uuuccuuacuucucuuguagU.....           |                                                    |                      | 19  | 1   | 19    | 1  | 3T3    |
| .....uuuccuuacuucucuuguag.....            |                                                    |                      | 1   | 0   | 1     | 0  | nt2    |
| .....uuacaagggcuggauagga.....             |                                                    |                      | 1   | 0   | 1     | 0  | pcl    |
| .....uacaagggcuggauaggaau.....            |                                                    |                      | 1   | 0   | 1     | 0  | pcl    |
| .....uuuccuuacuucucuuguag.....            |                                                    |                      | 1   | 0   | 1     | 0  | pcl    |

miRBase precursor : mmu\_chr3\_6937  
 Total read count : 323  
 mmu\_chr3\_6937\* read count: 178  
 mmu\_chr3\_6937 read count: 145  
 remaining reads : 178

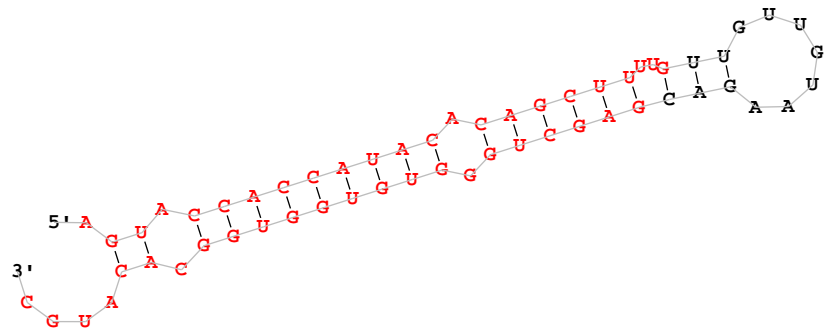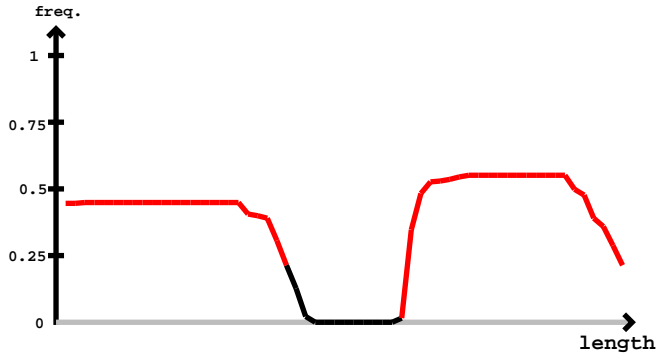

mmu\_chr3\_6937

mmu\_chr3\_6937\*

| 5' -               | mmu_chr3_6937*                                           | -3' | exp | reads | mm | sample |
|--------------------|----------------------------------------------------------|-----|-----|-------|----|--------|
| ..(((.....)))..... | aguaccaccauacacagcuuuuguuguugaagacgagcuggguguggggcacaugc |     |     | 1     | 0  | nkc    |
| .....              | aguaccaccauacacagcuuuu.....                              |     |     | 1     | 0  | nkc    |
| .....              | aguaccaccauacacagcuuuugu.....                            |     |     | 1     | 0  | nkc    |
| .....              | aguaccaccauacacagcuuuugu.....                            |     |     | 1     | 0  | nkc    |
| .....              | .....gagcuggguguggggcacaA..                              |     |     | 1     | 1  | nkc    |
| .....              | .....gagcuggguguggggcacaug.                              |     |     | 8     | 0  | 3T3    |
| .....              | .....gagcuggguguggggcacaCg.                              |     |     | 1     | 1  | 3T3    |
| .....              | .....gagcuggguguggggcacaugU                              |     |     | 2     | 1  | 3T3    |
| .....              | aguaccaccauacacagcuuuugu.....                            |     |     | 1     | 0  | mdc    |
| .....              | aguaccaccauacacagc.....                                  |     |     | 4     | 0  | CFU    |
| .....              | aguaccaccauacacagcuuuugu.....                            |     |     | 2     | 0  | CFU    |
| .....              | .....gagcugggCgugggca.....                               |     |     | 1     | 1  | CFU    |
| .....              | .....gagcuggguguggCggca.....                             |     |     | 1     | 1  | CFU    |
| .....              | .....gagcugggugugUuggca.....                             |     |     | 1     | 1  | CFU    |
| .....              | .....gagcugggugugggcaA.....                              |     |     | 1     | 1  | CFU    |
| .....              | .....gCgCuggguguggggcac.....                             |     |     | 1     | 1  | CFU    |
| .....              | .....gagcugggugugUuggcaca.....                           |     |     | 1     | 1  | CFU    |
| .....              | .....gagcugggugugggcaCaca.....                           |     |     | 1     | 0  | CFU    |
| .....              | .....gagcugggugugguUgcacau.....                          |     |     | 1     | 1  | CFU    |
| .....              | .....gagcuggguguggggcaca.....                            |     |     | 1     | 0  | CFU    |
| .....              | .....gagcuggguguggggcacCu.....                           |     |     | 3     | 1  | CFU    |
| .....              | .....gagcuggguguggggcCcau.....                           |     |     | 2     | 1  | CFU    |
| .....              | .....gagcuggguguggCggcaca.....                           |     |     | 1     | 1  | CFU    |
| .....              | .....gagcuggguguggggcacaug.                              |     |     | 2     | 0  | CFU    |
| .....              | .....gagcuggguguggggcacaugA                              |     |     | 1     | 1  | CFU    |
| .....              | .....gagcuggguguggggcacaugc                              |     |     | 1     | 0  | CFU    |
| .....              | .....gagcuggguguggggcacCugc                              |     |     | 1     | 1  | CFU    |
| .....              | .....agcuggguguggggcaU.....                              |     |     | 1     | 1  | CFU    |
| .....              | .....agcuggguguggggcaA.....                              |     |     | 1     | 1  | CFU    |
| .....              | .....agcuggguguggggcacaC.....                            |     |     | 1     | 1  | CFU    |
| .....              | .....agcuggguguggggcacaCgc                               |     |     | 2     | 1  | CFU    |

aguaccaccauacacagcuuuuguuguugaagacgagcuggguguggggcacaugc

|                               |   |   |     |
|-------------------------------|---|---|-----|
| .....agcuggguguggggcacaugc    | 2 | 0 | CFU |
| .....gcuggguguggggcacaugc     | 1 | 0 | CFU |
| .....gcuggguguggggcacaCgc     | 1 | 1 | CFU |
| .....cCggguguggggcacaugc      | 1 | 1 | CFU |
| aguaccaccauacacagcuuuu.....   | 1 | 0 | 48t |
| .....gagcuggguguggggcacaugU   | 1 | 1 | 48t |
| .....agcuggCuguggggca....     | 2 | 1 | mED |
| .....gcCggguguggggcaca..      | 1 | 1 | mED |
| .....gcuggguguggggcGcau..     | 1 | 1 | mED |
| .....gcuggguguggggcacaCgc     | 1 | 1 | mED |
| .....gguguggggcacaAgc         | 1 | 1 | mED |
| aguaccaccauacacagcuuu.....    | 1 | 0 | SSC |
| aguaccaUcauacacagcuuuugu..... | 1 | 1 | SSC |
| .....gagcuggguguggggcacaugc   | 1 | 0 | SSC |
| aguaccaccauacacagcu.....      | 1 | 0 | mzb |
| aguaccaccauacacagcuuuu.....   | 3 | 0 | mzb |
| aguaccaccauacacagcuuuug.....  | 3 | 0 | mzb |
| aguaccaccauacacagcuuuu.....   | 1 | 0 | gcb |
| aguaccaccauacacagcuuuug.....  | 1 | 0 | gcb |
| .....gagcuggguguggggcacaU.    | 1 | 1 | gcb |
| .....gagcuggguguggggcacaugU   | 1 | 1 | gcb |
| .....gcuggguguggggcacaugA     | 1 | 1 | gcb |
| Cguaccaccauacacagc.....       | 1 | 1 | t11 |
| aguaccaccauacacagc.....       | 1 | 0 | t11 |
| agCaccaccauacacagcuuuugu..... | 1 | 1 | t11 |
| aAuaccaccauacacagcuuuugu..... | 1 | 1 | t11 |
| aguaccaccauacacagcuuuugu..... | 2 | 0 | t11 |
| .....gagcuggguguggggcC.....   | 1 | 1 | t11 |
| .....gagcuggguguggggcaca..    | 1 | 0 | t11 |
| .....gagcuggguguggggcacaU.    | 1 | 1 | t11 |
| .....gagcuggguguggggcacCugc   | 1 | 1 | t11 |
| .....gagcuggguguggggcacaugA   | 1 | 1 | t11 |
| .....gagcuggguguggggcacaugU   | 1 | 1 | t11 |
| .....gagcuggguguggggcacaugc   | 1 | 0 | t11 |
| aguaccaUcauacacagcuuu.....    | 1 | 1 | ut2 |
| aguaccaccauacacagcuuuug.....  | 1 | 0 | ut2 |
| .....gagcuggguguggggcaca..    | 1 | 0 | ut2 |
| .....gagcuggguguggggcaca..    | 1 | 0 | je1 |
| .....gagcuggguguggggcaA....   | 1 | 1 | pc1 |
| .....gagcuggguguggggcacaugA   | 1 | 1 | pc1 |
| aguaccaccauacacagcuuuu.....   | 1 | 0 | kdn |
| aguaccaccauacacagcuuuu.....   | 2 | 0 | gc2 |
| aguaccaccauacacagcuuuug.....  | 3 | 0 | gc2 |
| aguaccaccauacacagcuuuugu..... | 1 | 0 | gc2 |
| .....gagcuggguguggggcacaG..   | 1 | 1 | gc2 |
| .....gagcuggguguggggcacaugA   | 1 | 1 | gc2 |
| .....agcuggAuguggggcac....    | 1 | 1 | hl1 |
| aguaccaccauacacagcuuuug.....  | 1 | 0 | sp2 |
| aguaccaccauacacagcuuuugu..... | 1 | 0 | sp2 |
| .....gagcuggguguggggcacaugA   | 1 | 1 | sp2 |
| aguaccaccauacacagcuuu.....    | 1 | 0 | mus |
| aguaccaccauacacagcuuuu.....   | 1 | 0 | mus |
| .....gagcuggguguggggAc.....   | 1 | 1 | Am2 |
| .....Aagcuggguguggggc.....    | 1 | 1 | Am2 |

aguaccaccauacacagcuuuuguuguugaagacgagcuggguguggggcacaugc

|                               |   |   |     |
|-------------------------------|---|---|-----|
| .....gagcCggguguggggc.....    | 1 | 1 | Am2 |
| .....gagcuggguguggggcCugc     | 1 | 1 | Am2 |
| .....gagcuggguguggggcacaugc   | 3 | 0 | Am2 |
| .....agcugggCguggggcac....    | 3 | 1 | Am2 |
| .....agcuggguguggggcacaugc    | 1 | 0 | Am2 |
| .....gagcuggguguggggc.....    | 1 | 0 | mm1 |
| aguaccaccauacacagcuuuu.....   | 2 | 0 | skn |
| aguaccaccauacacagcuuuug.....  | 1 | 0 | skn |
| aguaccaccauacacagc.....       | 1 | 0 | em2 |
| .....gagcuggguguggggcacaugA   | 1 | 1 | em2 |
| .....agcuggguguggggcac....    | 2 | 0 | mE8 |
| .....agcCggguguggggcac....    | 1 | 1 | mE8 |
| .....agcuggguguggggcCca...    | 1 | 1 | mE8 |
| .....agcuggguguggggcacaCgc    | 2 | 1 | mE8 |
| .....gcuggguguggggcac....     | 1 | 0 | mE8 |
| .....gcugggCguggggcaca...     | 1 | 1 | mE8 |
| .....uggguguggggcacaC...      | 1 | 1 | mE8 |
| .....uggguguggggcGcau...      | 1 | 1 | mE8 |
| .....gguguggggcGcaugc         | 1 | 1 | mE8 |
| aguaccaccauacacagcuu.....     | 1 | 0 | bm2 |
| aguaccaccauacacagcuuuug.....  | 1 | 0 | bm2 |
| .....gagcuggguguggggcacaugA   | 1 | 1 | bm2 |
| aguaccaccauacacagcuuuu.....   | 1 | 0 | h12 |
| aguaccaccauacacagcuuuugu..... | 2 | 0 | h12 |
| .....agcuggguguggggcaU....    | 1 | 1 | h12 |
| aguaccaccauacacagcuuuug.....  | 1 | 0 | ut1 |
| aguaccaccauacacagcuuuugu..... | 1 | 0 | ut1 |
| aguaccaccauacacagcuuu.....    | 1 | 0 | c8t |
| aguaccaccauacacagcuuuu.....   | 1 | 0 | c8t |
| .....gcuggguguggggcacaU..     | 1 | 0 | ay1 |
| aguaccaccauacacagcuuuugu..... | 2 | 0 | li3 |
| aguaccaccauacacagcuuuugu..... | 1 | 0 | Tm2 |
| .....gagcuggguguggggcacaug.   | 1 | 0 | Tm2 |
| .....agcCggguguggggcacaugc    | 1 | 1 | Tm2 |
| .....agcuggguguggggcacaCgc    | 1 | 1 | Tm2 |
| aguaccaccauacacagc.....       | 1 | 0 | hi2 |
| aguaccaccauacacagcuuuugu..... | 1 | 0 | hi2 |
| aguaccaccauacacagcuu.....     | 1 | 0 | ntr |
| aguaccaccauacacagcuuu.....    | 2 | 0 | ntr |
| aguaccaccauacacagcuuuu.....   | 2 | 0 | ntr |
| aguaccaccauacacagcuuuug.....  | 6 | 0 | ntr |
| .....gagcuggguguggggcacaugA   | 2 | 1 | ntr |
| aguaccaccauacacagc.....       | 1 | 0 | mm2 |
| aguaccaccauacacagcuuuug.....  | 1 | 0 | br1 |
| aguaccaccauacacagcuuuu.....   | 1 | 0 | hr3 |
| aguaccaccauacacagcuuuuU.....  | 3 | 1 | hr3 |
| aguaccaccauacacagcuuuugu..... | 3 | 0 | hr3 |
| aguaccaccauacacagcuuuuUu..... | 1 | 1 | hr3 |
| aguaccaccauacacagcuuuugu..... | 4 | 0 | hr3 |
| agGaccaccauacacagcuuuugu..... | 1 | 1 | hr3 |
| .guaccaccauacacagcuuuugu..... | 1 | 0 | hr3 |
| .....gagcuggguguggggcacaU.    | 1 | 1 | hr3 |
| .....gagcuggguguggggcacaU..   | 1 | 0 | ay2 |

aguaccaccauacacagcuuuuguuguuaagacgagcuggguguggggcacaugc

|                               |   |   |     |
|-------------------------------|---|---|-----|
| aguaccaccauacacagcuuu.....    | 1 | 0 | c4t |
| aguaccaccauacacagcuuu.....    | 3 | 0 | c4t |
| .....gagcuggguguggggcaA...    | 1 | 1 | c4t |
| .....gagcuggguguggggcacaugA   | 1 | 1 | c4t |
| .....gagcCggguguggggc.....    | 1 | 1 | TP2 |
| .....agcugggCguggggcacaug.    | 1 | 1 | TP2 |
| .....agcuggguguggggcGcaugc    | 1 | 1 | TP2 |
| .....gcuggguguggggcGc....     | 1 | 1 | TP2 |
| aguaccaccauacacagcu.....      | 1 | 0 | hr2 |
| aguaccaccauacacagcuuu.....    | 1 | 0 | pob |
| aguaccaccauacacagcuuu.....    | 1 | 0 | pob |
| .....gagcuggguguggggcacaugU   | 1 | 1 | pob |
| aguaccaccauacacagcuuu.....    | 1 | 0 | peb |
| aguaccaccauacacagcuuu.....    | 2 | 0 | peb |
| aguaccaccauacacagcuuuugu..... | 2 | 0 | peb |
| aguaccaccauacacagcuuuugu..... | 1 | 0 | TP1 |
| .....gagcuggguguggggcacaug.   | 1 | 0 | TP1 |
| .....gagcuggguguggggcacaugc   | 1 | 0 | TP1 |
| .....agcugggAuggggcacaugc     | 1 | 1 | TP1 |
| .....agcuggguguggggcGcaugc    | 1 | 1 | TP1 |
| aguaccaccauacacagc.....       | 5 | 0 | mE1 |
| aguaccaccauacacagcuuuugu..... | 2 | 0 | mE1 |
| aguaccaccauacaUagcuuuugu..... | 1 | 1 | mE1 |
| .....gagcuggguguggggcacaugA   | 2 | 1 | mE1 |
| .....agcuggguguggggcac.....   | 1 | 0 | mE1 |
| .....agcuggguguggggcacacA..   | 1 | 1 | mE1 |
| .....agcugggCguggggcacaug.    | 1 | 1 | mE1 |
| .....agcuggguguggggcacaCgc    | 1 | 1 | mE1 |
| .....agcuggguguggggcacaugc    | 1 | 0 | mE1 |
| .....gggAuggggcacaugc         | 1 | 1 | mE1 |
| aguaccaccauacacagcuuu.....    | 1 | 0 | bac |
| .....gagcugggugAgguggcaca..   | 1 | 1 | bac |
| .....gagcuggguguggggcacaugU   | 1 | 1 | bac |
| aguaccaccauacacagcuuuugu..... | 1 | 0 | mbm |
| .....gCguggguguggggcaca..     | 1 | 1 | mbm |
| .....gagcuggguguggggcacaugU   | 1 | 1 | mbm |
| .....gagcuggguguggggcaca..    | 1 | 0 | ool |
| aguaccaccauacacagcuuu.....    | 5 | 0 | 3Ta |
| .....gagcuggguguggggcaca..    | 1 | 0 | 3Ta |
| aguaccaccauacacagcuuu.....    | 3 | 0 | sp1 |
| aguaccaccauacacagcuuu.....    | 2 | 0 | sp1 |
| .....gagcuggguguggggcaAa..    | 1 | 1 | sp1 |
| .....gagcuggguguggggcacaU..   | 1 | 1 | sp1 |
| aguaccaccauacacagcu.....      | 1 | 0 | li1 |
| aUuaccaccauacacagcuuu.....    | 1 | 1 | li1 |
| aguaccaccauacacagcuuu.....    | 1 | 0 | li1 |
| .....gagcuggguguggggcaca..    | 1 | 0 | li1 |
| .....gagcuggguguggggcacaugc   | 3 | 0 | li1 |
| .....gagcuggguguggggcacaugU   | 1 | 1 | li1 |
| .....gagcuggguUuggggcacaugc   | 1 | 1 | li1 |
| .....agcuggguguggggcaca..     | 1 | 0 | li1 |
| .....gcuggguguggggcaU....     | 1 | 1 | li1 |
| .....gcuggguguggggcCc....     | 1 | 1 | li1 |
| .....gggAuggggcacaugc         | 1 | 1 | li1 |
| aguaccaccauacacagcuuu.....    | 1 | 0 | li2 |

aguaccaccauacacagcuuuuuguuguuaagacgagcuggguguggggcacaugc

|                               |   |   |     |
|-------------------------------|---|---|-----|
| .....gagcugggCgugguggc.....   | 1 | 1 | li2 |
| .....gagcuggguguggggcac....   | 1 | 0 | li2 |
| .....gagcuggguguggggcacaug.   | 1 | 0 | li2 |
| .....gagcuggguguggggcacaugA   | 1 | 1 | li2 |
| .....gagcuggguguggggcacaugU   | 1 | 1 | li2 |
| .....gagcuggguguggggcacaugc   | 1 | 0 | li2 |
| .....agcuggguguggggca.....    | 1 | 0 | li2 |
| .....agcuggguguAgugggcac....  | 2 | 1 | li2 |
| aguaccaccauacacagcuuu.....    | 1 | 0 | imb |
| aguaccaccauacacagcuuuug.....  | 1 | 0 | imb |
| aguaccaccauacacagcuuuugu..... | 2 | 0 | imb |
| aguaccaccauacacagcuuu.....    | 1 | 0 | bm1 |
| .....gagcuggguguggggcaG....   | 1 | 1 | th2 |
| .....gagcuggguguggggcacaugA   | 1 | 1 | th2 |
| aguaccaccauacacagcuuu.....    | 1 | 0 | sg1 |
| aguaccaccauacacagcuuuu.....   | 1 | 0 | sg1 |
| .....agcuggguguggggcGcaug.    | 3 | 1 | Tm1 |
| .....gcugggAguggggcacaug.     | 1 | 1 | Tm1 |
| .....ggguguggggcGcaugc        | 1 | 1 | Tm1 |
| aguaccaccauacacagcuuuug.....  | 1 | 0 | nt4 |
| .....gagcuggguguggggcaA....   | 1 | 1 | nt4 |
| .....gcugggCguggggcaca....    | 1 | 1 | mm3 |
| aguaccaccauacacagcuuu.....    | 2 | 0 | th7 |
| aguaccaccauacacagcuuuu.....   | 3 | 0 | th7 |
| .....gagcuggguguggggcacaugU   | 1 | 1 | th7 |
| aguaccaccauacacagcuuuugu..... | 2 | 0 | cx1 |
| aguaccaccauacacagcuuu.....    | 2 | 0 | nct |
| aguaccaccauacacagcuuuug.....  | 2 | 0 | nct |
| .....gagcuggguguggggcacaugA   | 1 | 1 | nct |
| aguaccaccaCacacagcuuuug.....  | 1 | 1 | Am1 |
| aguaccaccauacCagcuuuugu.....  | 1 | 1 | Am1 |
| .....Agagcuggguguggggc.....   | 4 | 1 | Am1 |
| .....Ggagcuggguguggggc.....   | 1 | 1 | Am1 |
| .....gagcuggguguggggc.....    | 1 | 0 | Am1 |
| .....gagcuggguAuggggc.....    | 3 | 1 | Am1 |
| .....gagcugggCguggggc.....    | 1 | 1 | Am1 |
| .....gagcuggguguggugAc.....   | 1 | 1 | Am1 |
| .....gagcuggguguggggcacaugc   | 3 | 0 | Am1 |
| .....agcuggguguggggcac....    | 1 | 0 | Am1 |
| .....agcugggCguggggcac....    | 3 | 1 | Am1 |
| .....agcCggguguggggcacaugc    | 1 | 1 | Am1 |





Mature

Star

|                                                                                                                   |   |   |     |
|-------------------------------------------------------------------------------------------------------------------|---|---|-----|
| cagguucuaagggcgagaagaaauaguuggauaguagguaaaauaacagucuuuuuccuugcuauucccaacuugguuuccuaaagaagaagaaagugaaauaccuggcauaa |   |   |     |
| .....aaauaguuggauaguagguaa.....                                                                                   | 2 | 0 | itr |
| .....aaauaguuggauaguagguaa.....                                                                                   | 1 | 0 | bm2 |
| .....aaauaguuggauaguagguaaaa.....                                                                                 | 1 | 0 | bm2 |
| .....uuccuugcuauucccaacuuggu.....                                                                                 | 1 | 0 | bm2 |
| .....aaauaguuggauaguagguaa.....                                                                                   | 1 | 0 | mE8 |
| .....Uauaguuggauaguagguaa.....                                                                                    | 1 | 1 | je2 |
| .....aaauaguuggauaguagguaa.....                                                                                   | 7 | 0 | je2 |
| .....aaauaguuggauaguagguaaaa.....                                                                                 | 1 | 0 | je2 |
| .....aaauaguuggauaguagguaaaa.....                                                                                 | 1 | 0 | c8t |
| .....aaauaguuggauaguaggua.....                                                                                    | 1 | 0 | ut1 |
| .....aaauaguuggauaguagguaa.....                                                                                   | 1 | 0 | ut1 |
| .....aaauaguuggauaguagguaaaa.....                                                                                 | 1 | 0 | em1 |
| .....aaauaguuggauaguagguaaaa.....                                                                                 | 1 | 0 | ntr |
| .....aaauaguuggauaguagguaaaa.....                                                                                 | 1 | 0 | pan |
| .....aaauaguuggauaguagguaa.....                                                                                   | 1 | 0 | nt1 |
| .....aaauaguuggauaguagguaaaa.....                                                                                 | 4 | 0 | nt1 |
| .....uaauaguuggauaguagguaa.....                                                                                   | 1 | 0 | pob |
| .....aaauaguuggauaguaggua.....                                                                                    | 1 | 0 | pob |
| .....aaauaguuggauaguagguaa.....                                                                                   | 2 | 0 | pob |
| .....aaauaguuggauaguagguaaaa.....                                                                                 | 1 | 0 | pob |
| .....aaauaguuggauaguagguaaaa.....                                                                                 | 1 | 0 | pob |
| .....uagggcgagaagaaauaguuggauaguagguaaUa.....                                                                     | 1 | 1 | tp2 |
| .....aaauaguuggauaguagguaa.....                                                                                   | 1 | 0 | peb |
| .....aaauaguuggauaguagguaaaa.....                                                                                 | 2 | 0 | peb |
| .....auaguuggauaguagguaa.....                                                                                     | 1 | 0 | te2 |
| .....aagaagaagaagugaaauacc.....                                                                                   | 1 | 0 | te2 |
| .....uagggcgagaagaaauaguuggauagu.....                                                                             | 1 | 0 | tp1 |
| .....aaauaguuggauaguagguaa.....                                                                                   | 1 | 0 | sp1 |
| .....aaauaguuggauaguagguaaaa.....                                                                                 | 1 | 0 | sp1 |
| .....aaauaguuggauaguagguaa.....                                                                                   | 3 | 0 | li1 |
| .....uuccuugcuauucccaacuuggu.....                                                                                 | 1 | 0 | li1 |
| .....uuuccuugcuauucccaacuuggu.....                                                                                | 1 | 0 | li2 |
| .....aaauaguuggauaguaggua.....                                                                                    | 1 | 0 | sg1 |
| .....aaauaguuggauaguagguaa.....                                                                                   | 2 | 0 | sg1 |
| .....aaauaguuggauaguagguaaaa.....                                                                                 | 1 | 0 | sg1 |
| .....uuccuugcuauucccaacuugg.....                                                                                  | 1 | 0 | sg1 |
| .....uaaagaagaagaagugaaauaccuggcau.....                                                                           | 1 | 0 | Tm1 |
| .....aaauaguuggauaguagguaa.....                                                                                   | 2 | 0 | th7 |

Provisional ID : chr4\_11627  
 Score total : 40.5  
 Score for star read(s) : 3.9  
 Score for read counts : 33.8  
 Score for mfe : 1.8  
 Score for randfold : 1.6  
 Score for cons. seed : -0.6  
 Total read count : 78  
 Mature read count : 46  
 Loop read count : 0  
 Star read count : 32

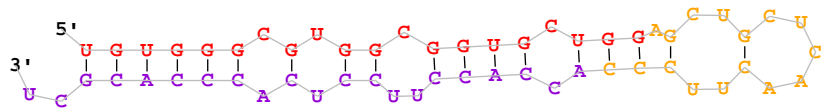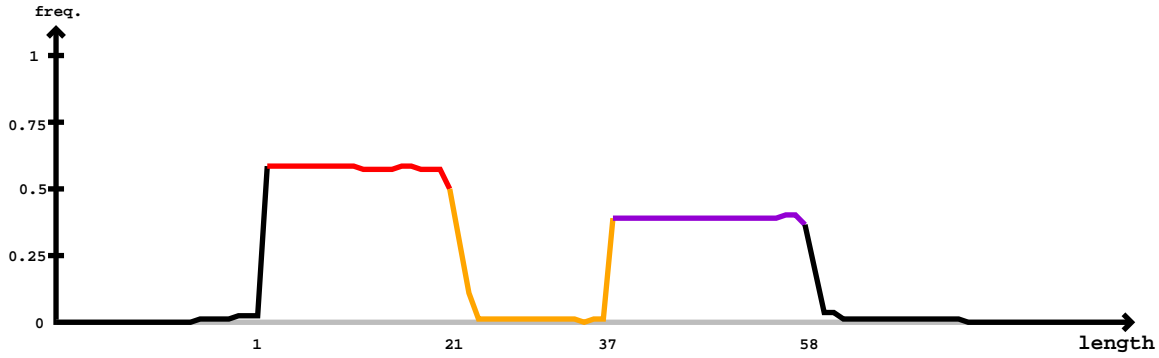

**Mature**

**Star**

| 5' -                                                                                                            |  | -3' | obs   | mm | sample |
|-----------------------------------------------------------------------------------------------------------------|--|-----|-------|----|--------|
| auguucacaagacgcagcagugugggcgugggcgugcuggagcugcucuaacuuccaccaccuuccucacccacgcugucuguguccucuaaccagccucugacacgcgcc |  |     | exp   |    |        |
| .....(((((((((((((((((((((.....))))))))))))))))))))))))))))))))))))))))))))))))))))))))))))))))))))))))))))     |  |     | reads |    |        |
| .....ugugggcgugggcgugcugg.....                                                                                  |  |     | 1     | 0  | nkc    |
| .....ugugggcgugggcgugcugg.....                                                                                  |  |     | 3     | 0  | nkc    |
| .....accaccuuccucacccacgcu.....                                                                                 |  |     | 1     | 0  | ntr    |
| .....ugugggcgugggcgugcugg.....                                                                                  |  |     | 2     | 0  | 3T3    |
| .....ugugggcgugggcgugcugga.....                                                                                 |  |     | 1     | 0  | 3T3    |
| .....ugugggcgugggcgugcuggaA.....                                                                                |  |     | 1     | 1  | 3T3    |
| .....ugugggcgugggcgugcuggaC.....                                                                                |  |     | 2     | 1  | 3T3    |
| .....ugugggcgugggcgugcuggaU.....                                                                                |  |     | 4     | 1  | 3T3    |
| .....accaccuuccucacccacgcu.....                                                                                 |  |     | 1     | 0  | 3T3    |
| .....accaccuuccucacccacgcuU.....                                                                                |  |     | 2     | 1  | CFU    |
| .....accaccuuccucacccacgcu.....                                                                                 |  |     | 1     | 0  | mm2    |
| .....accaccuuccucacccacgcu.....                                                                                 |  |     | 3     | 0  | mzb    |
| .....cagugugggcgugggcgug.....                                                                                   |  |     | 1     | 0  | gcb    |
| .....ugugggcgugggcgugcugg.....                                                                                  |  |     | 2     | 0  | gcb    |
| .....accaccuuccucacccacgcu.....                                                                                 |  |     | 1     | 0  | gcb    |
| .....ugugggcgugggcgugcugg.....                                                                                  |  |     | 1     | 0  | c4t    |
| .....accaccuuccucacccacgcuU.....                                                                                |  |     | 2     | 1  | hi1    |
| .....ccaccaccuuccucacccacgcu.....                                                                               |  |     | 1     | 0  | tp2    |
| .....ugugggcgugggcgugcugg.....                                                                                  |  |     | 1     | 0  | pob    |
| .....ugugggcgugggcgugcugg.....                                                                                  |  |     | 6     | 0  | pob    |
| .....ugugggcgugggcgugcugg.....                                                                                  |  |     | 1     | 0  | peb    |
| .....ugugggcgugggcgugcugg.....                                                                                  |  |     | 2     | 0  | peb    |

Mature

Star

|                                                          |                                                          |   |   |     |
|----------------------------------------------------------|----------------------------------------------------------|---|---|-----|
| auguucacaagacgcagcagugugggcgugggcgugcuggagcugcucaacuucco | accaccuuccucacccaacgcugucuguguccucuaaccagccucugacacgcgcc |   |   |     |
| .....                                                    | accaccuuccucacccaacgc.....                               | 1 | 0 | peb |
| .....                                                    | accaccuuccucacccaacgcU.....                              | 2 | 0 | peb |
| .....                                                    | accaccuuccucacccaacgcU.....                              | 1 | 1 | Tp1 |
| .....ugugggcgugggcgugcug.....                            | .....                                                    | 1 | 0 | sp2 |
| .....ugugggcgugggcgugcugg.....                           | .....                                                    | 1 | 0 | sp2 |
| .....                                                    | .....gcugucuCuguccuacc.....                              | 1 | 1 | mbm |
| .....ugugggcgugggcgugcugU.....                           | .....                                                    | 1 | 1 | oo1 |
| .....ugugggcgugggcgugcuggU.....                          | .....                                                    | 1 | 1 | oo1 |
| .....                                                    | accaccuuccucacccaacgcU.....                              | 2 | 1 | oo1 |
| .....ugugggcgugggcgugcugg.....                           | .....                                                    | 1 | 0 | sp1 |
| .....ugugggcgugggcgugcugga.....                          | .....                                                    | 1 | 0 | sp1 |
| .....ugugggcgugggcgugcuggaC.....                         | .....                                                    | 1 | 1 | 3Ta |
| .....                                                    | accaccuuccucacccaacgcUac.....                            | 2 | 1 | pgr |
| .....                                                    | accaccuuccucacccaacgcU.....                              | 1 | 1 | li1 |
| .....gcagcaguUugggcgug.....                              | .....                                                    | 1 | 1 | li2 |
| .....ugugggcgugggcgugcug.....                            | .....                                                    | 1 | 0 | li2 |
| .....ugcuggagcugcucaacuu.....                            | .....                                                    | 1 | 0 | li2 |
| .....                                                    | accaccuuccucacccaacgcU.....                              | 1 | 1 | li2 |
| .....                                                    | accaccuuccucacccaacgc.....                               | 1 | 0 | nt2 |
| .....ugugggcgugggcgugcug.....                            | .....                                                    | 1 | 0 | imb |
| .....ugugggcgugggcgugcugg.....                           | .....                                                    | 9 | 0 | imb |
| .....                                                    | accaccuuccucacccaacgcU.....                              | 4 | 0 | imb |
| .....                                                    | accaccuuccucacccaacgcug.....                             | 1 | 0 | imb |
| .....                                                    | accaccuuccucacccaacgcU.....                              | 1 | 0 | nt4 |
| .....                                                    | accaccuuccucacccaacgc.....                               | 1 | 0 | Tm1 |
| .....                                                    | accaccuuccucacccaacgcU.....                              | 1 | 1 | cx1 |
| .....                                                    | accaccuuccucacccaacgcU.....                              | 1 | 0 | nct |
| .....ugugggcgugggcgugcugga.....                          | .....                                                    | 1 | 1 | Am1 |





**Mature**

**Star**

|                                                                                                                           |   |   |     |
|---------------------------------------------------------------------------------------------------------------------------|---|---|-----|
| ucccagggauggcccggaacggacgcgccccguucucuguggaagcggcuugcucggcucugagc <u>uuccuggugggcccugggucccccgggucagcauugugcuaaugggug</u> |   |   |     |
| .....acgcggggCucucuguggaagc.....                                                                                          | 1 | 1 | cx1 |
| ...aggauggUccggacggacgcggggguucu.....                                                                                     | 1 | 1 | Aml |
| .....acgcggggguucucuguggaagc.....                                                                                         | 1 | 0 | Aml |
| .....ugagcuuccuggugggccucgggguc.....                                                                                      | 1 | 0 | Aml |











miRBase precursor : mmu\_chr5\_30975  
 Total read count : 581  
 mmu\_chr5\_30975 read count 560  
 mmu\_chr5\_30975\* read count 1  
 remaining reads : 21



mmu\_chr5\_30975

mmu\_chr5\_30975\*

| 5' -                                                                                                          | -3' | exp | reads | mm | sample |
|---------------------------------------------------------------------------------------------------------------|-----|-----|-------|----|--------|
| agaacagagccuggcaccacacgggggacuacaccgaggcagccuggcuuaguggaaaaggaacaggcuuuagagccagacugccuggguuuugaaucccagccuguca |     |     | 1     | 0  | nkc    |
| .....uuagagccagacugccuggguuu.....                                                                             |     |     | 5     | 0  | ay3    |
| .....uuagagccagacugccuggguuu.....                                                                             |     |     | 1     | 1  | ay3    |
| .....uuagagccagacugccuggguuC.....                                                                             |     |     | 1     | 1  | ay3    |
| .....uagagccagacugccuggguuu.....                                                                              |     |     | 2     | 0  | ay3    |
| .....uggguuCgaaucccagc.....                                                                                   |     |     | 2     | 1  | ay3    |
| .....uuagagccagacugccuggguuu.....                                                                             |     |     | 1     | 0  | CFU    |
| .....ccuggguuCgaauccca.....                                                                                   |     |     | 1     | 1  | mED    |
| .....uggguuCgaaucccagc.....                                                                                   |     |     | 1     | 1  | mED    |
| .....uuagagccagacugccuggguuu.....                                                                             |     |     | 1     | 0  | SSC    |
| .....cuggguuCgaaucccagc.....                                                                                  |     |     | 1     | 1  | t11    |
| .....uuagagccagacugccuggguuu.....                                                                             |     |     | 1     | 0  | ut2    |
| .....uuagagccagacugccuggguuu.....                                                                             |     |     | 1     | 0  | hlc    |
| .....uuagagccagacugccuggguuuA.....                                                                            |     |     | 1     | 1  | hlc    |
| .....uuagagccagacugccugg.....                                                                                 |     |     | 1     | 0  | mus    |
| .....uagagccagacugccuggguu.....                                                                               |     |     | 1     | 0  | mus    |
| .....agccagaUugccugggu.....                                                                                   |     |     | 1     | 1  | Am2    |
| .....uuagagccagacugccuggguuu.....                                                                             |     |     | 2     | 0  | te1    |
| .....uuagagccagacugccuggguuuU.....                                                                            |     |     | 1     | 1  | te1    |
| .....uuagagccagacugccuggguuu.....                                                                             |     |     | 2     | 0  | mm1    |
| .....uuagagccagacugccuggguuu.....                                                                             |     |     | 2     | 0  | mm1    |
| .....uuagagccagacugccugg.....                                                                                 |     |     | 2     | 0  | em2    |

agaacagagccuggcaccacaacacgggggacuaacagagcagcugcggcuuaguggaaaaggaacaggcuuagagccagacugcuggguuugaauccagccuguca

|                                      |    |   |     |
|--------------------------------------|----|---|-----|
| .....uuagagccagacugccugggu.....      | 1  | 0 | em2 |
| .....uuagagccagacugcuggguuA.....     | 1  | 1 | em2 |
| .....uuagagccagacugccuggguuu.....    | 4  | 0 | em2 |
| .....uggguuCgaauccagc.....           | 2  | 1 | em2 |
| .....uuagagccagacugcuggguuu.....     | 1  | 0 | bm2 |
| .....uuagagccagacugcuggguuu.....     | 1  | 0 | mE8 |
| .....cuggguuCgaauccagc.....          | 2  | 1 | mE8 |
| .....uggguuCgaauccagc.....           | 2  | 1 | mE8 |
| .....uuagagccagacugcuggguuu.....     | 3  | 0 | hl2 |
| .....uuagagccagacugcuggguuuU.....    | 1  | 1 | ut1 |
| .....cagggcuuagagccagacugccuggg..... | 1  | 0 | br2 |
| .....uuuagagccagacugccugg.....       | 1  | 0 | br2 |
| .....uuagagccagacugccugU.....        | 1  | 1 | br2 |
| .....uuagagccagacugccuggg.....       | 1  | 0 | br2 |
| .....uuagagccagacugccugggu.....      | 1  | 0 | br2 |
| .....uuagagccagacugcugggAuu.....     | 1  | 1 | br2 |
| .....uuagagccagacugcuggguu.....      | 9  | 0 | br2 |
| .....uuagagccagacugcugggUuu.....     | 1  | 1 | br2 |
| .....uuagagccagacugcuggguuu.....     | 55 | 0 | br2 |
| .....uuagagccagacugcuggguuA.....     | 5  | 1 | br2 |
| .....uuagagccagacugcugggGuu.....     | 1  | 1 | br2 |
| .....uuagagccagacugcuggguuuU.....    | 6  | 1 | br2 |
| .....uuagagccagacugcuggguuuA.....    | 2  | 1 | br2 |
| .....uuagagccagacugcuggguuuga.....   | 3  | 0 | br2 |
| .....uuagagccagacugcuggguuuUa.....   | 1  | 1 | br2 |
| .....uuagagccagacugcuggguuuAaa.....  | 1  | 1 | br2 |
| .....uagagccagacugcuggguuu.....      | 2  | 0 | br2 |
| .....uagagccagacugcuggguuugU.....    | 1  | 1 | br2 |
| .....uagagccagacugcuggguuuga.....    | 1  | 0 | br2 |
| .....uuagagccagacugcuggguu.....      | 1  | 0 | ay1 |
| .....uuagagccagacugcuggguuu.....     | 4  | 0 | ay1 |
| .....uagagccagacugccugg.....         | 1  | 0 | ay1 |
| .....uuagagccagacugcuggguuu.....     | 1  | 0 | ov2 |
| .....ccgagggcagcugggcuuagA.....      | 1  | 1 | hi2 |
| .....uuuagagccagacugccugg.....       | 1  | 0 | hi2 |
| .....uuuagagccagacugcugggA.....      | 1  | 1 | hi2 |
| .....uuuagagccagacugcuggggu.....     | 1  | 0 | hi2 |
| .....uuagagccagacugccug.....         | 1  | 0 | hi2 |
| .....uuagagccagacugccugg.....        | 15 | 0 | hi2 |
| .....uuagagccagacugccugA.....        | 1  | 1 | hi2 |
| .....uuagagccagacugcuggg.....        | 2  | 0 | hi2 |
| .....uuagagccagacugcugggA.....       | 2  | 1 | hi2 |
| .....uuagagccagacugcuggggu.....      | 27 | 0 | hi2 |
| .....uuagagccagacugcugggG.....       | 1  | 1 | hi2 |
| .....uuagagccagacugcuggguu.....      | 1  | 0 | hi2 |
| .....uuagagcUagacugcuggguuu.....     | 1  | 1 | hi2 |
| .....uuagagccagacugcuggguuu.....     | 52 | 0 | hi2 |
| .....uuagagccagacugcuggguuuA.....    | 1  | 1 | hi2 |
| .....uuagagccagacugcuggguuuU.....    | 4  | 1 | hi2 |
| .....uuagagccagacugcuggguuuga.....   | 3  | 0 | hi2 |
| .....uagagccagacugccugg.....         | 1  | 0 | hi2 |
| .....uagagccagacugcuggggu.....       | 1  | 0 | hi2 |
| .....uagagccagacugcuggguuu.....      | 1  | 0 | hi2 |
| .....uagagccagacugcuggguuuug.....    | 1  | 0 | hi2 |
| .....uagagccagacugcuggguuuU.....     | 1  | 1 | hi2 |
| .....uuagagccagacugccugg.....        | 1  | 0 | Tm2 |
| .....uuagagccagacugcuggggu.....      | 1  | 0 | Tm2 |
| .....uuagagccagacugcuggguuu.....     | 1  | 0 | em1 |
| .....uuagagccagacugcuggguuA.....     | 1  | 1 | mm2 |

agaacagagccuggcaccaaacacgggggacuaacacgagggcagccuggcuaaguggaaaaggaacaggcuuuagagccagacugccuggguuuugaaucccagccuguca

|                                      |    |   |     |
|--------------------------------------|----|---|-----|
| .....uuagagccagacugccuggguuu.....    | 9  | 0 | mm2 |
| .....uuagagccagacugccugggu.....      | 2  | 0 | br1 |
| .....uuagagccagacugccuggguuu.....    | 11 | 0 | br1 |
| .....uuagagccagacugccuggguuuA.....   | 1  | 1 | br1 |
| .....uagagccagacuUccuggguuu.....     | 1  | 1 | br1 |
| .....acugccuggguuuugaaucccag.....    | 1  | 0 | br1 |
| .....uuagagccagacugccuggguuu.....    | 1  | 0 | ay2 |
| .....uuagagccagacugccuggguuu.....    | 8  | 0 | ay2 |
| .....uuagagccagacugccuggguuuA.....   | 2  | 1 | ay2 |
| .....uuagagccagacugccuggguuuU.....   | 1  | 1 | ay2 |
| .....uagagccagacugccuggguuu.....     | 2  | 0 | ay2 |
| .....uuagagccagacugccuggguuuU.....   | 1  | 1 | hr2 |
| .....gcGagacugccuggguuu.....         | 1  | 1 | hr2 |
| .....aAgcuuuagagccagac.....          | 1  | 1 | hi1 |
| .....uuagagccagacugccugg.....        | 8  | 0 | hi1 |
| .....uuagagccGgacugccugg.....        | 1  | 1 | hi1 |
| .....uuagagccGgacugccugg.....        | 1  | 1 | hi1 |
| .....uuagagccagacugccugggu.....      | 15 | 0 | hi1 |
| .....uuagagUcagacugccugggu.....      | 1  | 1 | hi1 |
| .....uuagagccagacugccugggA.....      | 2  | 1 | hi1 |
| .....uuagagccagacugccugggu.....      | 3  | 0 | hi1 |
| .....uuagagccagacugccuggUuu.....     | 1  | 1 | hi1 |
| .....uuagagccaAacugccuggguuu.....    | 1  | 1 | hi1 |
| .....uuagagccagacugccuggguuu.....    | 40 | 0 | hi1 |
| .....uuagagccagacugccuggguuuA.....   | 1  | 1 | hi1 |
| .....uuagagccagacugccuggguuuU.....   | 4  | 1 | hi1 |
| .....uuagagccagacugccuggguuuA.....   | 1  | 1 | hi1 |
| .....uuagagccagacugccuggguuuuga..... | 1  | 0 | hi1 |
| .....uagagccagacugccugggu.....       | 1  | 0 | hi1 |
| .....uagagccagacugccuggguuu.....     | 1  | 0 | hi1 |
| .....uagagccagacugccugggUuu.....     | 1  | 1 | hi1 |
| .....uuagagccagacugccuggguuu.....    | 1  | 0 | Tp1 |
| .....uuagagccagacugccuggguuuU.....   | 1  | 1 | Tp1 |
| .....ccuggguuuugaUucccagc.....       | 1  | 1 | Tp1 |
| .....cugggCuugaaucccagc.....         | 1  | 1 | Tp1 |
| .....uuagagccagacugccugggu.....      | 1  | 0 | mE1 |
| .....uuagagccagacugccuggguuu.....    | 1  | 0 | mE1 |
| .....uuagagccagacugccuggguuuuga..... | 1  | 0 | mE1 |
| .....ccuggguuuCgaaucccagc.....       | 2  | 1 | mE1 |
| .....uggguuuCgaaucccagc.....         | 1  | 1 | mE1 |
| .....uuagagccagacugccuggguuu.....    | 7  | 0 | nb3 |
| .....uuagagccagacugccuggguuuU.....   | 1  | 1 | nb3 |
| .....uuagagccagacugccuggguuuA.....   | 1  | 1 | nb3 |
| .....uuagagccagacugccuggguuu.....    | 1  | 0 | mbm |
| .....uuagagccagacugccuggguuu.....    | 1  | 0 | oo1 |
| .....uuagaUccagacugccugggu.....      | 1  | 1 | li1 |
| .....uuagagccagacugccuggguuu.....    | 5  | 0 | li1 |
| .....uuagagccagacugccuggguuuU.....   | 3  | 1 | li1 |
| .....uuagagAcagacugccuggguuu.....    | 1  | 1 | li2 |
| .....uuagagccagacugccuggguuu.....    | 4  | 0 | li2 |
| .....uuagagccagacGgccuggguuu.....    | 1  | 1 | li2 |
| .....gccagacugccuggguuu.....         | 1  | 0 | li2 |
| .....uuagagccagacugccugggu.....      | 1  | 0 | Tm1 |
| .....uuagagccagacugccugggu.....      | 1  | 0 | Tm1 |
| .....uuagagccagacugccuggguuu.....    | 3  | 0 | em3 |
| .....uagagccagacugccuggguuu.....     | 1  | 0 | em3 |

agaacagagccuggcaccacaacacgggggacuaca**ccgagggcagccuggc**uuaguggaaaaggaacagggcuuu**agagccagacugccuggguu**ugaauccagccuguca

|                                |    |   |     |
|--------------------------------|----|---|-----|
| .....g                         | 1  | 0 | em3 |
| .....uuagagccagacugccuggguu    | 3  | 0 | nb2 |
| .....uuagagccagacugccuggguuA   | 1  | 1 | nb2 |
| .....uuagagccagacugccuggguu    | 2  | 0 | mm3 |
| .....cuggguuGgaauccagc         | 1  | 1 | mm3 |
| .....uuuagagccagacugccug       | 1  | 0 | cx1 |
| .....uuuagagccagacugccugg      | 3  | 0 | cx1 |
| .....Cuagagccagacugccuggg      | 1  | 1 | cx1 |
| .....uuagagccagacugccug        | 1  | 0 | cx1 |
| .....uuagagccagacugccugg       | 12 | 0 | cx1 |
| .....uuagagcAagacugccugggu     | 1  | 1 | cx1 |
| .....uuagagccagacugccCgggu     | 1  | 1 | cx1 |
| .....uuagagccagacugccugggA     | 1  | 1 | cx1 |
| .....uuagagccagacugccugggu     | 26 | 0 | cx1 |
| .....uuagagccagacugccuggguu    | 9  | 0 | cx1 |
| .....uuagagcGagacugccuggguu    | 1  | 1 | cx1 |
| .....uuagagccagacugccuggguu    | 54 | 0 | cx1 |
| .....uuagagccagacugcUuggguu    | 1  | 1 | cx1 |
| .....uuagagccagacugccuggguuA   | 1  | 1 | cx1 |
| .....uuagagccagacugccuggguuU   | 7  | 1 | cx1 |
| .....uuagagccagacugccuggguuug  | 2  | 0 | cx1 |
| .....uuagagccagacugccuggguuA   | 2  | 1 | cx1 |
| .....uuagagccagacugccuggguuugU | 1  | 1 | cx1 |
| .....uuagagccagacugccuggguuuga | 1  | 0 | cx1 |
| .....uagagccagacugccugg        | 1  | 0 | cx1 |
| .....uagagccagacugccugggu      | 1  | 0 | cx1 |
| .....uUgagccagacugccuggguu     | 1  | 1 | cx1 |
| .....agccagaUugccugggu         | 1  | 1 | Am1 |

miRBase precursor : mmu\_chr6\_12274  
 Total read count : 160  
 mmu\_chr6\_12274 read count 117  
 mmu\_chr6\_12274\* read count 16  
 remaining reads : 17

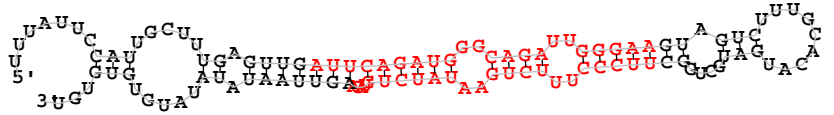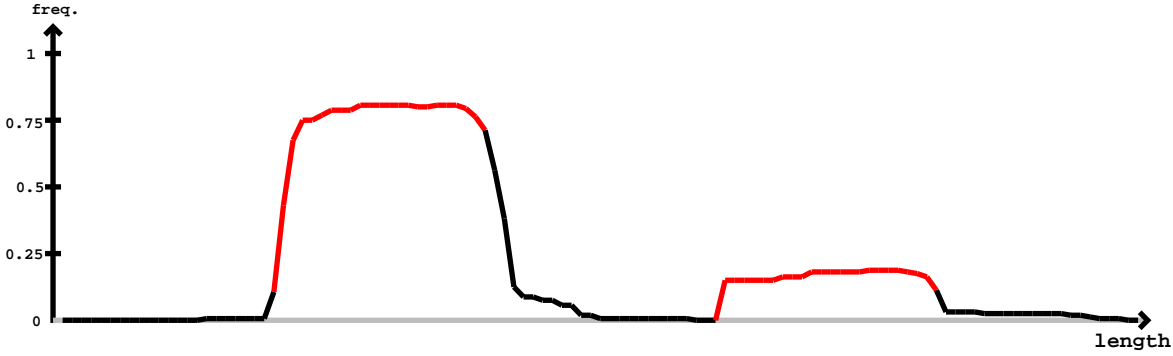

| mmu_chr6_12274                                                                                                         |                                                                                                                                 | mmu_chr6_12274* |    |     |  |        |
|------------------------------------------------------------------------------------------------------------------------|---------------------------------------------------------------------------------------------------------------------------------|-----------------|----|-----|--|--------|
| 5'                                                                                                                     | 3'                                                                                                                              | reads           | mm | exp |  | sample |
| uuuauccauugcuugaguugaauucagauugggcagauugggaaguagucuauugcacauugcuggc <u>uucccuuucugaauaucuguaga</u> aguuaauauaugugugugu | .....(((.....(((.....(((.....(((.....(((.....(((.....(((.....(((.....))).....))).....))).....))).....))).....))).....))).....)) | 1               | 0  | nkc |  | nkc    |
| .....a <u>uuc</u> cagauugggcagauugggaag.....                                                                           | .....uucccuuucugaauaucuguag.....                                                                                                | 3               | 0  | nkc |  | nkc    |
| .....uucccuuucugaauaucuguaga.....                                                                                      | .....uucccuuucugaauaucuguaga.....                                                                                               | 1               | 0  |     |  | nkc    |
| .....uucccuuucugaauaucuguaga.....                                                                                      | .....uucccuuucugaauaucuguaga.....                                                                                               | 1               | 0  | ay3 |  | ay3    |
| .....a <u>uuc</u> cagauugggcagauugggaag.....                                                                           | .....uucccuuucugaauaucuguag.....                                                                                                | 1               | 0  | mdc |  | mdc    |
| .....a <u>uuc</u> cagauugggcagauugggaagu.....                                                                          | .....uucccuuucugaauaucuguag.....                                                                                                | 1               | 0  | CFU |  | CFU    |
| .....uucccuuucugaauaucuguag.....                                                                                       | .....uucccuuucugaauaucuguag.....                                                                                                | 1               | 0  | CFU |  | CFU    |
| .....uucccuuucugaauaucuguaga.....                                                                                      | .....uucccuuucugaauaucuguagU.....                                                                                               | 5               | 0  | CFU |  | CFU    |
| .....uucccuuucugaauaucuguagU.....                                                                                      | .....uucccuuucugaauaucuguagU.....                                                                                               | 1               | 1  | CFU |  | CFU    |
| .....a <u>uuc</u> cagauugggcagauugggaag.....                                                                           | .....uucccuuucugaauaucuguag.....                                                                                                | 1               | 0  | 48t |  | 48t    |
| .....ucagauugggcagauugggaagu.....                                                                                      | .....uucccuuucugaauaucuguaga.....                                                                                               | 1               | 0  | t11 |  | t11    |
| .....uucccuuucugaauaucuguaga.....                                                                                      | .....uucccuuucugaauaucuguagU.....                                                                                               | 1               | 0  | t11 |  | t11    |
| .....uucccuuucugaauaucuguagU.....                                                                                      | .....uucccuuucugaauaucuguagU.....                                                                                               | 1               | 1  | t11 |  | t11    |
| .....a <u>uuc</u> cagauugggcagauugggaag.....                                                                           | .....uucccuuucugaauaucuguag.....                                                                                                | 1               | 0  | gcb |  | gcb    |
| .....a <u>uuc</u> cagauugggcagauugggaag.....                                                                           | .....uucccuuucugaauaucuguag.....                                                                                                | 1               | 0  | gcb |  | gcb    |
| .....a <u>uuc</u> cagauugggcagauugggaagu.....                                                                          | .....uucccuuucugaauaucuguag.....                                                                                                | 2               | 0  | gcb |  | gcb    |
| .....uucccuuucugaauaucuguaga.....                                                                                      | .....uucccuuucugaauaucuguag.....                                                                                                | 2               | 0  | gcb |  | gcb    |
| .....uucccuuucugaauaucuguaga.....                                                                                      | .....uucccuuucugaauaucuguag.....                                                                                                | 2               | 0  | gcb |  | gcb    |
| .....uucccuuucugaauaucuguaga.....                                                                                      | .....uucccuuucugaauaucuguag.....                                                                                                | 2               | 0  | gcb |  | gcb    |
| .....uucccuuucugaauaucuguaga.....                                                                                      | .....uucccuuucugaauaucuguag.....                                                                                                | 1               | 0  | gcb |  | gcb    |
| .....agaugggcagauugggaaguagucu.....                                                                                    | .....uucccuuucugaauaucuguaga.....                                                                                               | 3               | 0  | gcb |  | gcb    |
| .....g <u>au</u> ugggcagauugggaagu.....                                                                                | .....uucccuuucugaauaucuguaga.....                                                                                               | 1               | 0  | gcb |  | gcb    |
| .....uucccuuucugaauaucuguaga.....                                                                                      | .....uucccuuucugaauaucuguaga.....                                                                                               | 1               | 0  | gcb |  | gcb    |
| .....uucccuuucugaauaucuguaga.....                                                                                      | .....uucccuuucugaauaucuguaga.....                                                                                               | 1               | 0  | kdn |  | kdn    |
| .....uucccuuucugaauaucuguaga.....                                                                                      | .....uucccuuucugaauaucuguaga.....                                                                                               | 1               | 0  | pc1 |  | pc1    |
| .....uucccuuucugaauaucuguaga.....                                                                                      | .....uucccuuucugaauaucuguaga.....                                                                                               | 1               | 0  | pc1 |  | pc1    |



mmu\_chr6\_12274

uuuauuccauugcuugaguugaauucagauugggcagauugggaaguagucuugcacaugaugcuggcuucccuuucugaauaucuguagaaguuaauauauaugugugugu

|                                             |   |   |     |
|---------------------------------------------|---|---|-----|
| .....auucagauugggcagauuggg.....             | 2 | 0 | gc2 |
| .....auucagauugggcagauuggga.....            | 1 | 0 | gc2 |
| .....auucagauugggcagauugggaa.....           | 2 | 0 | gc2 |
| .....auucagauugggcagauugggaag.....          | 2 | 0 | gc2 |
| .....auucagauugggcagauugggaagu.....         | 1 | 0 | gc2 |
| .....uucagauugggcagauuggg.....              | 1 | 0 | gc2 |
| .....uucccuuucugaauaucug.....               | 1 | 0 | gc2 |
| .....uucccuuucugaauaucugu.....              | 1 | 0 | gc2 |
| .....auucagauugggcagauugg.....              | 1 | 0 | sp2 |
| .....auucagauugggcagauugggaag.....          | 2 | 0 | sp2 |
| .....auucagauugggcagauugggaagua.....        | 1 | 0 | sp2 |
| .....uucagauugggcagauugggaa.....            | 2 | 0 | sp2 |
| .....uucagauugggcagauugggaagu.....          | 1 | 0 | sp2 |
| .....auucagauugggcagauugggaagu.....         | 1 | 0 | mus |
| .....ucagauugggcagauugggaag.....            | 1 | 0 | mus |
| .....gauucagauugggcagauugggaagu.....        | 5 | 0 | Am2 |
| .....gauucagauugggcagauugggaaguagCcuuu..... | 3 | 1 | Am2 |
| .....uucccuuucugaauaucuguag.....            | 1 | 0 | skn |
| .....uucagauugggcagauugggaag.....           | 1 | 0 | mm1 |
| .....uucagauugggcagauugggaa.....            | 1 | 0 | nt2 |
| .....uucagauugggcagauugggaag.....           | 1 | 0 | nt2 |
| .....uucagauugggcagauugggaagu.....          | 1 | 0 | nt2 |
| .....ucagauugggcagauugggaagu.....           | 1 | 0 | nt2 |
| .....auucagauugggcagauuggga.....            | 1 | 0 | itr |
| .....auucagauugggcagauugggaa.....           | 1 | 0 | itr |
| .....uucagauugggcagauugggaagu.....          | 2 | 0 | itr |
| .....gauugggcagauugggaaguagu.....           | 1 | 0 | bm2 |
| .....uucccuuucugaauaucuguag.....            | 1 | 0 | bm2 |
| .....ucagauugggcagauugggaag.....            | 1 | 0 | mE8 |
| .....auucagauugCgcagauugggaag.....          | 1 | 1 | h12 |
| .....auucagauugggcagauugggaagu.....         | 1 | 0 | c8t |
| .....uucagauugggcagauuggga.....             | 1 | 0 | c8t |
| .....ugaauaucuguagaaguuaauauauaug.....      | 1 | 0 | Tm2 |
| .....uGcugaauaucuguaga.....                 | 1 | 1 | em1 |
| .....uucccuuucugaauaucuguag.....            | 1 | 0 | ntr |
| .....auucagauugggcagauuggg.....             | 1 | 0 | nt1 |
| .....uucccuuucugaauaucuguaga.....           | 1 | 0 | nt1 |
| .....auucagauugggcagauuggga.....            | 1 | 0 | ay2 |
| .....uucccuuucugaauaucuguaga.....           | 1 | 0 | ay2 |
| .....uucagauugggcagauugggaagu.....          | 2 | 0 | c4t |
| .....uucccuuucugaauaucuguaga.....           | 1 | 0 | c4t |
| .....ugaauaucuguagaaguuaauauauau.....       | 1 | 0 | Tp2 |
| .....ugaauaucuguagaaguuaauauauauaug.....    | 1 | 0 | Tp2 |
| .....ucuguagaaguuaauauauaugugugu.....       | 1 | 0 | Tp2 |
| .....auucagauugggcagauuggga.....            | 1 | 0 | pob |
| .....auucagauugggcagauugggaagu.....         | 1 | 0 | pob |
| .....uucagauugggcagauugggaag.....           | 1 | 0 | pob |
| .....uucccuuucugaauaucuguag.....            | 1 | 0 | pob |
| .....auucagauugggcagauugggaa.....           | 2 | 0 | peb |

mmu\_chr6\_12274

uuuauuccauugcuuugaguugauucagaugggcagaugggaaguagucuuugcacaugaugcuggcuucccuuucugaauaucuguagaaguuaauuauaugugugugu

|                        |                  |                     |        |       |     |     |     |
|------------------------|------------------|---------------------|--------|-------|-----|-----|-----|
| .....uucagau           | gggcagau         | gggaa               | .....  | 1     | 0   | peb |     |
| .....uucagau           | gggcagau         | gggaagu             | .....  | 1     | 0   | peb |     |
| .....                  | ugggaagu         | agucuuugcacaugaugcu | .....  | 1     | 0   | Tp1 |     |
| .....auucagau          | gggcagau         | gggaa               | .....  | 1     | 0   | bac |     |
| .....auucagau          | gggcagau         | gggaag              | .....  | 1     | 0   | bac |     |
| .....auucagau          | gggcagau         | gggaagu             | .....  | 1     | 0   | bac |     |
| .....uucagau           | gggcagau         | gggaagu             | .....  | 1     | 0   | bac |     |
| .....uugagu            | uga              | uucagau             | gggcag | ..... | 1   | 0   | oo1 |
| .....auucagau          | gggcagau         | gggaag              | .....  | 3     | 0   | sp1 |     |
| .....uucagau           | gggcagau         | gggaag              | .....  | 1     | 0   | sp1 |     |
| .....uucagau           | gggcagau         | gggaagu             | .....  | 2     | 0   | sp1 |     |
| .....ucagau            | gggcagau         | gggaa               | .....  | 1     | 0   | sp1 |     |
| .....ucagau            | gggcagau         | gggaagua            | .....  | 1     | 0   | sp1 |     |
| .....ucagau            | gggcagau         | gggaagu             | .....  | 2     | 0   | li2 |     |
| .....auucagau          | gggcagau         | ugg                 | .....  | 1     | 0   | imb |     |
| .....auucagau          | gggcagau         | ggga                | .....  | 1     | 0   | imb |     |
| .....auucagau          | gggcagau         | gggaa               | .....  | 1     | 0   | imb |     |
| .....auucagau          | gggcagau         | gggaag              | .....  | 2     | 0   | imb |     |
| .....uucagau           | gggcagau         | gggaa               | .....  | 1     | 0   | imb |     |
| .....uucagau           | gggcagau         | gggaag              | .....  | 2     | 0   | imb |     |
| .....uucagau           | gggcagau         | gggaagu             | .....  | 1     | 0   | imb |     |
| .....ucagau            | gggcagau         | gggaagua            | .....  | 1     | 0   | imb |     |
| .....auucagau          | gggcagau         | ugg                 | .....  | 1     | 0   | th2 |     |
| .....auucagau          | gggcagau         | gggaag              | .....  | 1     | 0   | th2 |     |
| .....auucagau          | gggcagau         | gggaagu             | .....  | 1     | 0   | th2 |     |
| .....uucagau           | gggcagau         | gggaag              | .....  | 2     | 0   | th2 |     |
| .....g                 | ugggcagau        | gggaagua            | .....  | 1     | 0   | th2 |     |
| .....uuccuuucugaauaucu | gaga             | .....               | 1      | 0     | th2 |     |     |
| .....uucagau           | gggcagau         | gggaagu             | .....  | 1     | 0   | sg1 |     |
| .....ucagau            | gggcagau         | gggaagu             | .....  | 1     | 0   | sg1 |     |
| .....auucagau          | gggcagau         | gggaa               | .....  | 2     | 0   | nt4 |     |
| .....auucagau          | gggcagau         | gggaagu             | .....  | 1     | 0   | nt4 |     |
| .....uucagau           | gggcagau         | gggaa               | .....  | 2     | 0   | nt4 |     |
| .....uucagau           | gggcagau         | gggaag              | .....  | 2     | 0   | nt4 |     |
| .....auucagau          | gggcagau         | gggaa               | .....  | 1     | 0   | th7 |     |
| .....auucagau          | gggcagau         | gggaagu             | .....  | 1     | 0   | th7 |     |
| .....uucagau           | gggcagau         | gggaa               | .....  | 1     | 0   | nct |     |
| .....uucagau           | gggcagau         | gggaagu             | .....  | 1     | 0   | nct |     |
| .....ucagau            | gggcagau         | gggaa               | .....  | 1     | 0   | nct |     |
| .....gauucagau         | gggcagau         | gggaagu             | .....  | 5     | 0   | Am1 |     |
| .....gauucagau         | gggcagau         | gggaaguagCcuu       | .....  | 3     | 1   | Am1 |     |
| .....gggcagau          | gggaagu          | .....               | 1      | 0     | Am1 |     |     |
| .....gggcagau          | gggaaguagucuuugc | .....               | 1      | 0     | Am1 |     |     |
| .....ggAcagau          | gggaaguagucuuugc | .....               | 1      | 1     | Am1 |     |     |

Provisional ID : chr6\_15427  
 Score total : 32  
 Score for star read(s) : 3.9  
 Score for read counts : 25.6  
 Score for mfe : 1.5  
 Score for randfold : 1.6  
 Score for cons. seed : -0.6  
 Total read count : 62  
 Mature read count : 45  
 Loop read count : 0  
 Star read count : 17

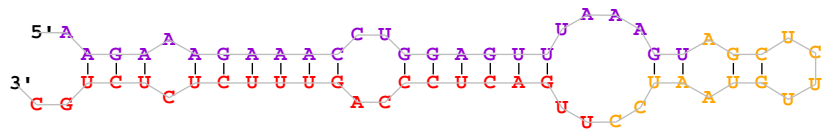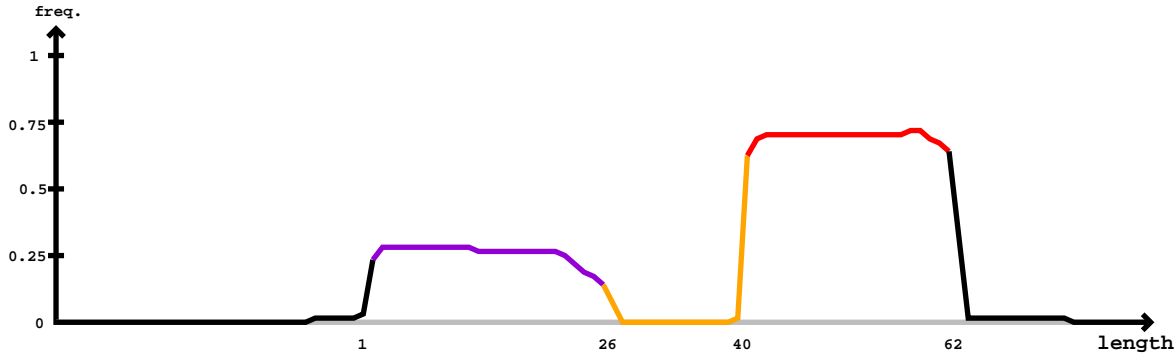

**Star**

**Mature**

| 5'                              | Star                 | Mature                               | -3'                  | obs | mm | sample |
|---------------------------------|----------------------|--------------------------------------|----------------------|-----|----|--------|
| caaggucaaggccagcccagauacaugagaa | aagaagaaccuggaguuuaa | agcucuuguaaucuugacuccaguuucucucugc   | cuugggucuaaguuggcugg | 1   | 0  | ntr    |
| caaggucaaggccagcccagauacaugagaa | aagaagaaccuggaguuuaa | guagcucuuguaaucuugacuccaguuucucucugc | cuugggucuaaguuggcugg | 1   | 0  | CFU    |
| caaggucaaggccagcccagauacaugagaa | aagaagaaccuggaguuuaa | guagcucuuguaaucuugacuccaguuucucucugc | cuugggucuaaguuggcugg | 5   | 0  | CFU    |
| caaggucaaggccagcccagauacaugagaa | aagaagaaccuggaguuuaa | guagcucuuguaaucuugacuccaguuucucucugc | cuugggucuaaguuggcugg | 2   | 0  | CFU    |
| caaggucaaggccagcccagauacaugagaa | aagaagaaccuggaguuuaa | guagcucuuguaaucuugacuccaguuucucucugc | cuugggucuaaguuggcugg | 1   | 0  | 48t    |
| caaggucaaggccagcccagauacaugagaa | aagaagaaccuggaguuuaa | guagcucuuguaaucuugacuccaguuucucucugc | cuugggucuaaguuggcugg | 1   | 0  | t11    |
| caaggucaaggccagcccagauacaugagaa | aagaagaaccuggaguuuaa | guagcucuuguaaucuugacuccaguuucucucugc | cuugggucuaaguuggcugg | 1   | 0  | hi1    |
| caaggucaaggccagcccagauacaugagaa | aagaagaaccuggaguuuaa | guagcucuuguaaucuugacuccaguuucucucugc | cuugggucuaaguuggcugg | 1   | 1  | hi1    |
| caaggucaaggccagcccagauacaugagaa | aagaagaaccuggaguuuaa | guagcucuuguaaucuugacuccaguuucucucugc | cuugggucuaaguuggcugg | 1   | 0  | hi1    |
| caaggucaaggccagcccagauacaugagaa | aagaagaaccuggaguuuaa | guagcucuuguaaucuugacuccaguuucucucugc | cuugggucuaaguuggcugg | 1   | 0  | pob    |
| caaggucaaggccagcccagauacaugagaa | aagaagaaccuggaguuuaa | guagcucuuguaaucuugacuccaguuucucucugc | cuugggucuaaguuggcugg | 1   | 0  | pob    |
| caaggucaaggccagcccagauacaugagaa | aagaagaaccuggaguuuaa | guagcucuuguaaucuugacuccaguuucucucugc | cuugggucuaaguuggcugg | 1   | 0  | pob    |
| caaggucaaggccagcccagauacaugagaa | aagaagaaccuggaguuuaa | guagcucuuguaaucuugacuccaguuucucucugc | cuugggucuaaguuggcugg | 1   | 0  | pob    |
| caaggucaaggccagcccagauacaugagaa | aagaagaaccuggaguuuaa | guagcucuuguaaucuugacuccaguuucucucugc | cuugggucuaaguuggcugg | 1   | 0  | peb    |
| caaggucaaggccagcccagauacaugagaa | aagaagaaccuggaguuuaa | guagcucuuguaaucuugacuccaguuucucucugc | cuugggucuaaguuggcugg | 2   | 0  | gc2    |
| caaggucaaggccagcccagauacaugagaa | aagaagaaccuggaguuuaa | guagcucuuguaaucuugacuccaguuucucucugc | cuugggucuaaguuggcugg | 1   | 0  | gc2    |
| caaggucaaggccagcccagauacaugagaa | aagaagaaccuggaguuuaa | guagcucuuguaaucuugacuccaguuucucucugc | cuugggucuaaguuggcugg | 1   | 1  | Tp1    |
| caaggucaaggccagcccagauacaugagaa | aagaagaaccuggaguuuaa | guagcucuuguaaucuugacuccaguuucucucugc | cuugggucuaaguuggcugg | 1   | 0  | Tp1    |
| caaggucaaggccagcccagauacaugagaa | aagaagaaccuggaguuuaa | guagcucuuguaaucuugacuccaguuucucucugc | cuugggucuaaguuggcugg | 1   | 0  | Tp1    |
| caaggucaaggccagcccagauacaugagaa | aagaagaaccuggaguuuaa | guagcucuuguaaucuugacuccaguuucucucugc | cuugggucuaaguuggcugg | 1   | 0  | Tp1    |
| caaggucaaggccagcccagauacaugagaa | aagaagaaccuggaguuuaa | guagcucuuguaaucuugacuccaguuucucucugc | cuugggucuaaguuggcugg | 1   | 1  | bac    |
| caaggucaaggccagcccagauacaugagaa | aagaagaaccuggaguuuaa | guagcucuuguaaucuugacuccaguuucucucugc | cuugggucuaaguuggcugg | 1   | 0  | bac    |
| caaggucaaggccagcccagauacaugagaa | aagaagaaccuggaguuuaa | guagcucuuguaaucuugacuccaguuucucucugc | cuugggucuaaguuggcugg | 1   | 0  | sp2    |

Star

Mature

caaggucaaggccagcccagagauacaugagaagaagaagaaccuggaguuuaaaguagcucuuguaaucuugacuccaguuucucucugcuuguggucuaguuggcucgg

|                                   |    |   |     |
|-----------------------------------|----|---|-----|
| .....uugacuccaguuucucucugc.....   | 1  | 0 | sp1 |
| .....uugacuccaguuCucucucugc.....  | 1  | 1 | 3Ta |
| .....uugacuccaguuucucucugc.....   | 15 | 0 | 3Ta |
| .....gacuccaguuucucucugc.....     | 1  | 0 | 3Ta |
| .....agaaagaaccuggaguuuaaagu..... | 1  | 0 | li2 |
| .....cuugacuccaguuucucucugU.....  | 1  | 1 | li2 |
| .....uugacuccaguuucucucugc.....   | 1  | 0 | li1 |
| .....ucugcuGguggucuagu.....       | 1  | 1 | li1 |
| .....uugacuccaguuucucucugc.....   | 1  | 0 | em2 |
| .....uugacuccaguuucucucugc.....   | 1  | 0 | h12 |
| .....uugacuccaguuucucucugc.....   | 1  | 0 | nt4 |
| .....aagaagaaccuggaguuua.....     | 1  | 0 | Tm1 |
| .....aagaagaaccuggaguuuaag.....   | 1  | 0 | Tm1 |
| .....uugacuccaguuucucucugc.....   | 4  | 0 | Tm1 |
| .....uugacuccUaguuucucucugc.....  | 1  | 1 | Tm1 |
| .....aagaagaaccuggaguuu.....      | 1  | 0 | th7 |
| .....uugacuccaguuucucucugc.....   | 1  | 0 | cx1 |
| .....aagaagaaccuggaguuua.....     | 1  | 0 | nct |



Star

Mature

gccccacagugguaguagggcuugggauccuuugcccuggcuucagaucucggcaaccaucacuaacuagaucuguaagugaugggcaagAACuccaugcccucugagccuu

|                                     |   |   |     |
|-------------------------------------|---|---|-----|
| .....aucuguaagugaugggcaagua.....    | 1 | 0 | bac |
| .....aucuguaagugaugggcaagAAC.....   | 1 | 0 | bac |
| .....Caucucggcaaccaucac.....        | 1 | 1 | h11 |
| .....aucuguaagugaugggcaagAAC.....   | 1 | 0 | h11 |
| .....aucuguaagugaugggcaagAAC.....   | 1 | 1 | h11 |
| .....aucuguaagugaugggcaagAAC.....   | 3 | 0 | sp1 |
| .....aucuguaagugaugggcaagAAC.....   | 1 | 0 | bm1 |
| .....aucuCuagugaugggcaagAAC.....    | 1 | 1 | imb |
| .....aucuguaagugaugggcaagAAC.....   | 1 | 0 | itr |
| .....aucuguaagugaugggcaagAAC.....   | 1 | 0 | th2 |
| .....aucuguaagugaugggcaagAAC.....   | 1 | 0 | th2 |
| .....aucuguaagugaugggcaagAAC.....   | 1 | 0 | bm2 |
| .....aucuguaagugaugggcaagAAC.....   | 1 | 0 | bm2 |
| .....aucuguaagugaugggcaagAAC.....   | 1 | 0 | nt4 |
| .....uuugcccuggcuucagaucucg.....    | 1 | 0 | h12 |
| .....cuucagaucucggcaacca.....       | 1 | 0 | h12 |
| .....aucuguaagugaugggcaagAAC.....   | 1 | 0 | h12 |
| .....aucuguaagCgugaugggcaagAAC..... | 1 | 1 | h12 |
| .....aucuguaagugaugUgcaagAAC.....   | 1 | 1 | h12 |
| .....aucuguaagugaugggcaagAACU.....  | 2 | 1 | h12 |
| .....aucuguaagugaugggcaagAAC.....   | 2 | 0 | Tm1 |
| .....aucuguaagugaugggcaagAAC.....   | 1 | 0 | Tm1 |
| .....aucuguaagugaugggcaagAAC.....   | 1 | 0 | th7 |
| .....aucuguaagugaugggcaagAAC.....   | 1 | 0 | ut1 |



Mature

Star

cugaacucagagcaugguucugacagcagugcuguagacauggucucucagcaucucuccagcacugcuuguuuucugacaugcuacugauaagcacugcagugagugaug

|                                        |    |   |     |
|----------------------------------------|----|---|-----|
| .....gcagugcuguagacauggucucuc.....     | 1  | 0 | gc2 |
| .....ucucuccagcacugcuuguuuuc.....      | 1  | 0 | gc2 |
| cugaacucagagcaugguuc.....              | 1  | 0 | sp2 |
| .....agugcuguagacauggucucucag.....     | 1  | 0 | sp2 |
| .....ucucuccagcacugcuuguuuuc.....      | 5  | 0 | sp2 |
| .....ugacagcagugcuguagacauc.....       | 1  | 0 | bac |
| .....gacagcagugcuguagacaugguc.....     | 1  | 0 | bac |
| .....gacagcagugcuguagacauggucucuc..... | 1  | 0 | bac |
| .....gugcuguagacauggucucuc.....        | 1  | 0 | bac |
| .....gugcuguagacauggucucuca.....       | 1  | 0 | bac |
| .....ucucuccagcacugcuuguuuuc.....      | 1  | 0 | bac |
| .....ucucuccagcacugcuuguuuuc.....      | 1  | 0 | mbm |
| .....ucucuccagcacugcuuguuuuc.....      | 3  | 0 | sp1 |
| .....ucucuccagcacugcuuguuuuc.....      | 1  | 0 | Am2 |
| .....ucucuccagcacugcuuguuuuc.....      | 1  | 0 | itr |
| .....ugacagcagugcuguagacauc.....       | 1  | 0 | imb |
| .....ucucuccagcacugcuuguuuuc.....      | 5  | 0 | imb |
| .....augguucugacagcagug.....           | 1  | 0 | sg1 |
| .....ucucuccagcacugcuuguuuuc.....      | 1  | 0 | sg1 |
| cugaacucagagcaugguuA.....              | 1  | 1 | bm2 |
| .....acagcagugcuguagacauggu.....       | 1  | 0 | bm2 |
| .....cugacagcagugcuguagacauc.....      | 1  | 0 | nt4 |
| .....ugacagcagugcuguagacauc.....       | 35 | 0 | nt4 |
| .....acagcagugcuguagacauggu.....       | 1  | 0 | nt4 |
| .....gcagugcuguagacauggucucuc.....     | 1  | 0 | nt4 |
| .....cuguagacauggucucucagc.....        | 2  | 0 | nt4 |
| .....ucucuccagcacugcuuguuuuc.....      | 1  | 0 | nt4 |
| .....ucucuccagcacugcuuguuuuc.....      | 2  | 0 | nt4 |
| .....ucucuccagcacugcuuguuuuc.....      | 8  | 0 | nt4 |
| .....cucuccagcacugcuuguuuuc.....       | 1  | 0 | nt4 |
| .....ucuccagcacugcuuguuuucuga.....     | 1  | 0 | nt4 |
| .....ugacagcagugcuguagacauc.....       | 6  | 0 | th7 |
| .....ucucuccagcacugcuuguuuuc.....      | 3  | 0 | th7 |
| .....ucucuccagcacugcuuguuuuc.....      | 6  | 0 | th7 |
| .....ucucuccagcacugcuuguuuuc.....      | 21 | 0 | th7 |
| .....ucucuccagcacugcuuguuuuc.....      | 1  | 0 | c8t |
| .....ucucuccagcacugcuuguuuuc.....      | 2  | 0 | Am1 |



miRBase precursor : mmu\_chr7\_14441  
 Total read count : 532  
 mmu\_chr7\_14441 read count 51  
 mmu\_chr7\_14441\* read count 45  
 remaining reads : 136

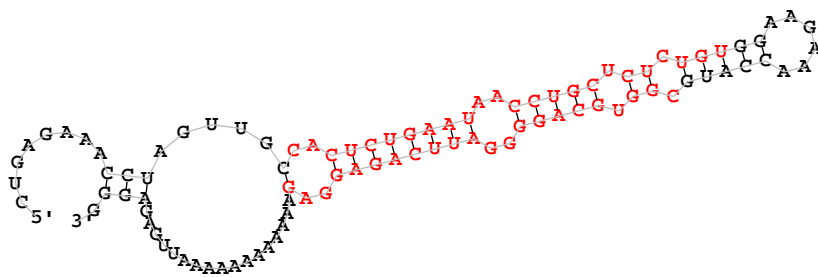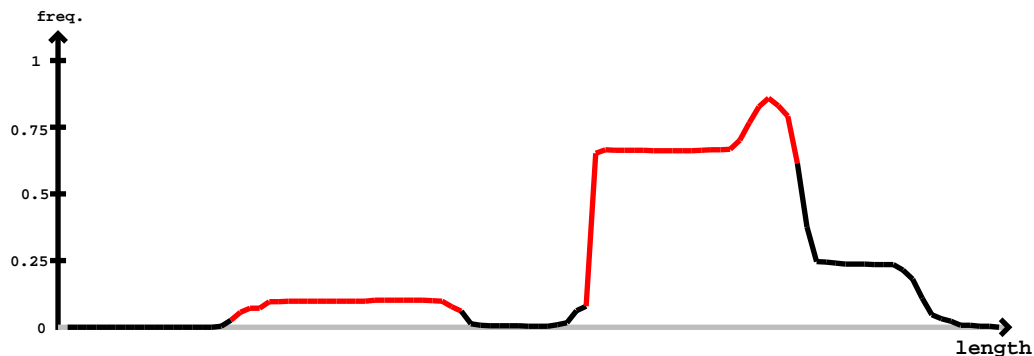

mmu\_chr7\_14441

mmu\_chr7\_14441\*

| 5'                                                              | 3'                                   | exp                    | reads | mm | sample |
|-----------------------------------------------------------------|--------------------------------------|------------------------|-------|----|--------|
| cugagaaaccuaguugccacucugaauaaccugcucucugu                       | ggaagaaaccaugcggugcaggggaauucagaggag | aaaaaaaaaaaaauugagaggg |       |    |        |
| .....(((.....((.....(((.....(((.....(((.....)))))))).)))).)))). |                                      |                        |       |    |        |
| .....cacucugaauaaccugcucucugu.....                              |                                      |                        | 1     | 0  | E15    |
| .....augcggugcaggggaauucagagU.....                              |                                      |                        | 1     | 1  | E15    |
| .....gCggugcaggggaauucagaggaA.....                              |                                      |                        | 1     | 1  | E15    |
| .....cggugcaggggaauucagaggag.....                               |                                      |                        | 1     | 0  | E15    |
| .....cggugcaggggaauucagaggagU.....                              |                                      |                        | 2     | 1  | E15    |
| .....cggugcaggggaauucagaggaga.....                              |                                      |                        | 1     | 0  | E15    |
| .....cacucugaauaaccugcucucug.....                               |                                      |                        | 1     | 0  | nkc    |
| .....ugcggugcaggggaauucagagga.....                              |                                      |                        | 1     | 0  | nkc    |
| .....cggugcaggggaauucagagga.....                                |                                      |                        | 1     | 0  | nkc    |
| .....cggugcaggggaauucagaggag.....                               |                                      |                        | 2     | 0  | nkc    |
| .....cggugcaggggaauucagaggaga.....                              |                                      |                        | 2     | 0  | nkc    |
| .....ucugaauaaccugcucucugu.....                                 |                                      |                        | 5     | 0  | 3T3    |
| .....agaggagaaaaaaaaaaaauuU.....                                |                                      |                        | 5     | 1  | 3T3    |
| .....ccacucugaauaaccugcucucu.....                               |                                      |                        | 1     | 0  | mdc    |
| .....ccacucugaauaaccugcucucugu.....                             |                                      |                        | 1     | 0  | mdc    |
| .....ugcggugcaggggaauucagagga.....                              |                                      |                        | 1     | 0  | mdc    |
| .....cggugcaggggaauucagaggag.....                               |                                      |                        | 5     | 0  | mdc    |
| .....cggugcaggggaauucagaggaga.....                              |                                      |                        | 3     | 0  | mdc    |
| .....caugcggugcaggggaauucagaggagaaaU.....                       |                                      |                        | 2     | 1  | CFU    |
| .....ggugcaggggaauucagaggaga.....                               |                                      |                        | 1     | 0  | CFU    |
| .....gCggagaaaaaaaaaaaa.....                                    |                                      |                        | 2     | 1  | CFU    |
| .....gaggGgaaaaaaaaaaaa.....                                    |                                      |                        | 1     | 1  | CFU    |
| .....gaggagGaaaaaaaaaaaa.....                                   |                                      |                        | 2     | 1  | CFU    |
| .....gaggAaaaaaaaaaaaa.....                                     |                                      |                        | 1     | 1  | CFU    |
| .....gaggagaaaaaaaaaaaaA.....                                   |                                      |                        | 2     | 1  | CFU    |
| .....aggAaaaaaaaaaaaa.....                                      |                                      |                        | 1     | 1  | CFU    |
| .....ugcggugcaggggaauucagag.....                                |                                      |                        | 2     | 0  | 48t    |
| .....cggugcaggggaauucagag.....                                  |                                      |                        | 1     | 0  | 48t    |
| .....cggugcaggggaauucagagga.....                                |                                      |                        | 6     | 0  | 48t    |

cugagaaaccuaguugccacucugaauaaccugcucucuguggaagaaccaugcggugcaggggaauucagaggagaaaaaaaaaaaauugagaggg

|                                     |   |   |     |
|-------------------------------------|---|---|-----|
| .....cggugcaggggaauucagaggag.....   | 4 | 0 | 48t |
| .....agaggGgaaaaaaaaa.....          | 1 | 1 | mED |
| .....gaggGgaaaaaaaaa.....           | 5 | 1 | mED |
| .....gaggAaaaaaaaaa.....            | 1 | 1 | mED |
| .....aggUgaaaaaaaaa.....            | 1 | 1 | mED |
| .....aggaAaaaaaaaaa.....            | 1 | 1 | mED |
| .....aggGgaaaaaaaaa.....            | 1 | 1 | mED |
| .....cggugcaggggaauucagaggga.....   | 1 | 0 | mzb |
| .....cggugcaggggaauucagaggag.....   | 3 | 0 | mzb |
| .....cggugcaggggaauucagaggaga.....  | 1 | 0 | mzb |
| .....ucugaauaaccugcucucuguU.....    | 1 | 1 | SSC |
| .....auuAagaggagaaaaaa.....         | 1 | 1 | SSC |
| .....ggagaaaaaaaaaaaA.....          | 1 | 1 | SSC |
| .....ccacucugaauaaccugcucucugu..... | 1 | 0 | lun |
| .....cggugcaggggaauucagag.....      | 1 | 0 | lun |
| .....cggugcaggggaauucagagg.....     | 1 | 0 | lun |
| .....cggugcaggggaauucagaggga.....   | 2 | 0 | lun |
| .....cggugcaggggaauucagaggag.....   | 1 | 0 | lun |
| .....cggugcaggggaauucagaggaga.....  | 1 | 0 | lun |
| .....gCggagaaaaaaaaa.....           | 1 | 1 | t11 |
| .....gaggAaaaaaaaaa.....            | 2 | 1 | t11 |
| .....cacucugaauaaccugcucucugu.....  | 1 | 0 | gcb |
| .....ugcggugcaggggaauucagag.....    | 1 | 0 | gcb |
| .....cggugcaggggaauucagagg.....     | 1 | 0 | gcb |
| .....cggugcaggggaauucagaggga.....   | 6 | 0 | gcb |
| .....cggugcaggggaauucagaggag.....   | 4 | 0 | gcb |
| .....cggugcaggggaauucagaggag.....   | 2 | 0 | ut2 |
| .....cggugcaggggaauucagaggagU.....  | 1 | 1 | ut2 |
| .....cggugcaggggaauucagaggaga.....  | 2 | 0 | ut2 |
| .....cggugcaggggaauucagaggagaa..... | 1 | 0 | ut2 |
| .....caugcggugcaggggaauucag.....    | 1 | 0 | kdn |
| .....cggugcaggggaauucagagg.....     | 1 | 0 | kdn |
| .....cggugcaggggaauucagaggga.....   | 2 | 0 | kdn |
| .....cggugcaggggaauucagaggag.....   | 4 | 0 | kdn |
| .....cggugcaggggaauucagaggaga.....  | 2 | 0 | kdn |
| .....cggugcaggggaauucagaggag.....   | 1 | 0 | h1c |
| .....cggugcaggggaauucagaggaga.....  | 1 | 0 | h1c |
| .....cggugcaggggaauucagaggagU.....  | 1 | 1 | h1c |
| .....acucugaauaaccugcucucug.....    | 1 | 0 | sp2 |
| .....ugcggugcaggggaauucaga.....     | 1 | 0 | sp2 |
| .....ugcggugcaggggaauucagaggga..... | 1 | 0 | sp2 |
| .....gCggugcaggggaauucagaggaga..... | 1 | 0 | sp2 |
| .....cggugcaggggaauucagagg.....     | 1 | 0 | sp2 |
| .....cggugcaggggaauucagaggga.....   | 2 | 0 | sp2 |
| .....cggugcaggggaauucagaggag.....   | 2 | 0 | sp2 |
| .....cggugcaggggaauucagaggaga.....  | 2 | 0 | sp2 |
| .....cacucugaauaaccugcucucug.....   | 1 | 0 | h11 |
| .....ugcggugcaggggaauucagagg.....   | 1 | 0 | h11 |
| .....cggugcaggggaauucagaggagU.....  | 2 | 1 | h11 |
| .....cggugcaggggaauucagaggga.....   | 1 | 0 | mus |
| .....cggugcaggggaauucagaggag.....   | 3 | 0 | mus |
| .....ggugcaggggaauucagaggga.....    | 1 | 0 | mus |
| .....augcggugcaggggaauucagGg.....   | 1 | 1 | Am2 |
| .....aggagaaaaaaaaaaC.....          | 1 | 1 | Am2 |
| .....aggaAaaaaaaaaaaU.....          | 1 | 1 | Am2 |
| .....aggaAaaaaaaaaaaUU.....         | 1 | 1 | Am2 |

cugagaaaccuaguugccacucugaauaaccugcucucuguggaagaaccaugcggugcaggggaauucagaggagaaaaaaaaaaaauugagaggg

|                                     |   |   |     |
|-------------------------------------|---|---|-----|
| .....Agagaaaaaaaaaaaaa.....         | 1 | 1 | Am2 |
| .....gaLaaaaaaaaaaaauu.....         | 2 | 1 | Am2 |
| .....cggugcaggggaauucagagga.....    | 1 | 0 | skn |
| .....cggugcaggggaauucagaggag.....   | 1 | 0 | skn |
| .....ugcggugcaggggaauucagagga.....  | 1 | 0 | nt2 |
| .....cggugcaggggaauucagagga.....    | 1 | 0 | nt2 |
| .....cggugcaggggaauucagaggag.....   | 1 | 0 | nt2 |
| .....cacucugaauaaccugcucucu.....    | 1 | 0 | itr |
| .....ugcggugcaggggaauucagag.....    | 1 | 0 | itr |
| .....cggugcaggggaauucagagga.....    | 8 | 0 | itr |
| .....cggugcaggggaauucagaggag.....   | 8 | 0 | itr |
| .....cggugcaggggaauucagaggaga.....  | 5 | 0 | itr |
| .....ggugcaggggaauucagaggaga.....   | 1 | 0 | itr |
| .....aggGgaaaaaaaaaaaa.....         | 1 | 1 | em2 |
| .....aLaaaaaaaaaaaauuuga.....       | 1 | 1 | em2 |
| .....ugaauaaccugcucucuguggaagU..... | 1 | 1 | mE8 |
| .....ugcggugcaggggaauucagag.....    | 1 | 0 | mE8 |
| .....cggugcaggggaauucagaggag.....   | 1 | 1 | mE8 |
| .....cggugcaggggaauucagaggaga.....  | 1 | 0 | mE8 |
| .....gaggGgaaaaaaaaaaaa.....        | 4 | 1 | mE8 |
| .....gaggGgaaaaaaaaaaaa.....        | 3 | 1 | mE8 |
| .....aggagUaaaaaaaaaaaa.....        | 1 | 1 | mE8 |
| .....aggagGaaaaaaaaaaaa.....        | 4 | 1 | mE8 |
| .....ggagaaaaaaaaaaaaA.....         | 1 | 1 | mE8 |
| .....ccacucugaauaaccugcucucu.....   | 3 | 0 | bm2 |
| .....cggugcaggggaauucagagg.....     | 2 | 0 | bm2 |
| .....cggugcaggggaauucagagga.....    | 1 | 0 | bm2 |
| .....ggugcaggggaauucagaggag.....    | 1 | 0 | bm2 |
| .....uuAgaggagaaaaaaaaaaaa.....     | 1 | 1 | bm2 |
| .....gcccugcaggggaauucagaggagU..... | 1 | 1 | hl2 |
| .....cggugcaggggaauucagaggag.....   | 3 | 0 | hl2 |
| .....cggugcaggggaauucagaggagU.....  | 1 | 1 | hl2 |
| .....aggagaaaaaaaaGaa.....          | 1 | 1 | hl2 |
| .....ugcggugcaggggaauucagagg.....   | 1 | 0 | c8t |
| .....cggugcaggggaauucagag.....      | 1 | 0 | c8t |
| .....cggugcaggggaauucagagg.....     | 2 | 0 | c8t |
| .....cggugcaggggaauucagagga.....    | 8 | 0 | c8t |
| .....cggugcaggggaauucagaggag.....   | 4 | 0 | c8t |
| .....gccacucugaauaaccugcucucu.....  | 1 | 0 | ut1 |
| .....cggugcaggggaauucagaggag.....   | 1 | 0 | ut1 |
| .....cggugcaggggaauucagaggagU.....  | 1 | 1 | ut1 |
| .....cggugcaggggaauucagaggagU.....  | 1 | 1 | ut1 |
| .....ccacucugaauaaccugcucucu.....   | 1 | 0 | Tm2 |
| .....cacucugaauaaccugcucucugu.....  | 1 | 0 | Tm2 |
| .....ucugaauaaccugcucucucugu.....   | 1 | 0 | Tm2 |
| .....ucugaauaaccugcucucugugU.....   | 1 | 1 | Tm2 |
| .....ggugcaggggaauucagaggaga.....   | 1 | 0 | Tm2 |
| .....agaggagaaaCa.....              | 1 | 1 | Tm2 |
| .....aggagaaaaCa.....               | 2 | 1 | Tm2 |
| .....cggugcaggggaauucagag.....      | 2 | 0 | ntr |
| .....cggugcaggggaauucagagga.....    | 5 | 0 | ntr |
| .....cggugcaggggaauucagaggag.....   | 8 | 0 | ntr |
| .....cggugcaggggaauucagaggaga.....  | 1 | 0 | ntr |
| .....aLaaaaaaaaaaaauuuga.....       | 1 | 1 | mm2 |
| .....Aaaaaaaaaaaaauuuga.....        | 1 | 1 | mm2 |
| .....cggugcaggggaauucagaggag.....   | 1 | 0 | nt1 |

cugagaaaccuaguugccacucugaauaaccugcucucuguggaagaaccaugcggugcaggggaauucagaggagaaaaaaaaaaaauugagaggg

|                                        |    |   |     |
|----------------------------------------|----|---|-----|
| .....gCagaaaaaaaaaaaau.....            | 1  | 1 | ay2 |
| .....cacucugaauaaccugcucucugu.....     | 1  | 0 | c4t |
| .....ugcggugcaggggaauucagagg.....      | 1  | 0 | c4t |
| .....cggugcaggggaauucagagg.....        | 1  | 0 | c4t |
| .....cggugcaggggaauucagagga.....       | 2  | 0 | c4t |
| .....cggugcaggggaauucagaggag.....      | 4  | 0 | c4t |
| .....cggugcaggggaauucagaggaga.....     | 3  | 0 | c4t |
| .....ggugcaggggaauucagaggaga.....      | 1  | 0 | c4t |
| .....aggGgaaaaaaaaaaaau.....           | 1  | 1 | hr2 |
| .....cacucugaauaaccugcucucu.....       | 1  | 0 | pob |
| .....cacucugaauaaccugcucucug.....      | 1  | 0 | pob |
| .....cacucugaauaaccugcucucugu.....     | 2  | 0 | pob |
| .....ugcggugcaggggaauucagagg.....      | 1  | 0 | pob |
| .....ugcggugcaggggaauucagagg.....      | 1  | 0 | pob |
| .....gcccugcaggggaauucagagg.....       | 1  | 0 | pob |
| .....gcccugcaggggaauucagagg.....       | 1  | 0 | pob |
| .....cggugcaggggaauucagagga.....       | 7  | 0 | pob |
| .....cggugcaggggaauucagaggag.....      | 10 | 0 | pob |
| .....cggugcaggggaauucagaggaga.....     | 7  | 0 | pob |
| .....acucugaauaaccugcucucugu.....      | 2  | 0 | hi1 |
| .....ucugaauaaccuAcucucucugu.....      | 1  | 1 | hi1 |
| .....ucugaauaaccugcucucugu.....        | 1  | 0 | Tp2 |
| .....ugcucucuguggaagaaccaugcggGgc..... | 1  | 1 | Tp2 |
| .....ugcggugcaggggaauucagagg.....      | 1  | 0 | Tp2 |
| .....ccacucugaauaaccugcucucugu.....    | 1  | 0 | peb |
| .....cacucugaauaaccugcucucug.....      | 1  | 0 | peb |
| .....acucugaauaaccugcucucugu.....      | 1  | 0 | peb |
| .....cggugcaggggaauucagagga.....       | 6  | 0 | peb |
| .....cggugcaggggaauucagaggag.....      | 6  | 0 | peb |
| .....cggugcaggggaauucagaggaga.....     | 6  | 0 | peb |
| .....ugcucucuguggaagaaccaugcg.....     | 1  | 0 | Tp1 |
| .....cggugcaggggaauucagagga.....       | 1  | 0 | Tp1 |
| .....cagGggagaaaaaaaaaaaa.....         | 1  | 1 | Tp1 |
| .....Ggaggagaaaaaaaaaaaa.....          | 1  | 1 | Tp1 |
| .....agaggagGaaaaaaaaaaaa.....         | 1  | 1 | Tp1 |
| .....Ggaggagaaaaaaaaaaaa.....          | 1  | 1 | Tp1 |
| .....gaggagGaaaaaaaaaaaa.....          | 1  | 1 | Tp1 |
| .....aggaaaaaaaaaaaaaa.....            | 1  | 1 | Tp1 |
| .....aggUgaaaaaaaaaaaa.....            | 1  | 1 | Tp1 |
| .....ggagaaaaaaaaaaaaA.....            | 2  | 1 | Tp1 |
| .....ggagDaaaaaaaaaaaauu.....          | 1  | 1 | Tp1 |
| .....agGggagaaaaaaaaaaaa.....          | 1  | 1 | mE1 |
| .....aggGgaaaaaaaaaaaa.....            | 1  | 1 | mE1 |
| .....aggagaaaaaaaaaaaa.....            | 1  | 0 | mE1 |
| .....aaaaaaaaaaaaGugaga.....           | 1  | 1 | mE1 |
| .....cacucugaauaaccugcucucu.....       | 1  | 0 | mbm |
| .....cggugcaggggaauucagaggag.....      | 2  | 0 | mbm |
| .....ugcggugcaggggaauucagagga.....     | 2  | 0 | 3Ta |
| .....acucugaauaaccugcucucug.....       | 1  | 0 | sp1 |
| .....cggugcaggggaauucagagga.....       | 2  | 0 | sp1 |
| .....cggugcaggggaauucagaggag.....      | 4  | 0 | sp1 |
| .....cggugcaggggaauucagaggaga.....     | 1  | 0 | sp1 |
| .....cacucugaauaaccugcucucug.....      | 1  | 0 | li1 |
| .....cggugcaggggaauucagaggaga.....     | 1  | 0 | li1 |
| .....acucugaauaaccugcucucug.....       | 1  | 0 | li2 |

cugagaaaccuaguugccacucugaauaaccugcucucugu ggaagaaccaugcggugcaggggaauucagaggagaaaaaaaaaaauugagaggg

|                                     |   |   |     |
|-------------------------------------|---|---|-----|
| .....gaggGgaaaaaaaaaaaa.....        | 1 | 1 | li2 |
| .....ccacucugaauaaccugcucucugu..... | 1 | 0 | imb |
| .....cacucugaauaaccugcucucugu.....  | 1 | 0 | imb |
| .....gcccugcaggggaauucagaggga.....  | 1 | 0 | imb |
| .....cggugcaggggaauucagagg.....     | 5 | 0 | imb |
| .....cggugcaggggaauucagaggga.....   | 4 | 0 | imb |
| .....cggugcaggggaauucagaggag.....   | 7 | 0 | imb |
| .....cggugcaggggaauucagaggaga.....  | 5 | 0 | imb |
| .....acucugaauaaccugcucucu.....     | 1 | 0 | bm1 |
| .....ugcggugcaggggaauucagagg.....   | 1 | 0 | bm1 |
| .....cggugcaggggaauucagaggga.....   | 3 | 0 | bm1 |
| .....cggugcaggggaauucagaggag.....   | 8 | 0 | bm1 |
| .....cggugcaggggaauucagaggaga.....  | 2 | 0 | bm1 |
| .....gccacucugaauaaccugcucucu.....  | 1 | 0 | th2 |
| .....ugcggugcaggggaauucagaggga..... | 1 | 0 | th2 |
| .....gcccugcaggggaauucagaga.....    | 1 | 0 | th2 |
| .....cggugcaggggaauucagagg.....     | 1 | 0 | th2 |
| .....cggugcaggggaauucagagg.....     | 1 | 0 | th2 |
| .....cggugcaggggaauucagaggga.....   | 2 | 0 | th2 |
| .....cggugcaggggaauucagaggag.....   | 9 | 0 | th2 |
| .....cggugcaggggaauucagaggaga.....  | 4 | 0 | th2 |
| .....ggugcaggggaauucagaggagaaa..... | 1 | 0 | th2 |
| .....ugcggugcaggggaauucagagg.....   | 1 | 0 | sg1 |
| .....gcccugcaggggaauucagaggga.....  | 1 | 0 | sg1 |
| .....cggugcaggggaauucagaggga.....   | 3 | 0 | sg1 |
| .....cggugcaggggaauucagaggag.....   | 1 | 0 | sg1 |
| .....cggugcaggggaauucagaggaga.....  | 2 | 0 | sg1 |
| .....ccacucugaauaaccugcucucugA..... | 1 | 1 | Tm1 |
| .....cacucugaauaaccugcucucuc.....   | 1 | 0 | Tm1 |
| .....ucugaauaaccugcucucucugu.....   | 1 | 0 | Tm1 |
| .....ucugaauaaccugcucucuguU.....    | 2 | 1 | Tm1 |
| .....cggugcaggggaauucagaga.....     | 1 | 0 | Tm1 |
| .....cggugcaggggaauucagagggaU.....  | 1 | 1 | Tm1 |
| .....agaggagGaaaaaaaaa.....         | 1 | 1 | Tm1 |
| .....Ggaggagaaaaaaaaa.....          | 5 | 1 | Tm1 |
| .....Ggaggagaaaaaaaaa.....          | 1 | 1 | Tm1 |
| .....gGggagaaaaaaaaa.....           | 5 | 1 | Tm1 |
| .....gGggagaaaaaaaaa.....           | 1 | 1 | Tm1 |
| .....Gggagaaaaaaaaa.....            | 2 | 1 | Tm1 |
| .....ggagaGaaaaaaaaau.....          | 1 | 1 | Tm1 |
| .....ggagaaaaaaaaaaaau.....         | 1 | 0 | Tm1 |
| .....ggagaaaaaaaaaaaaA.....         | 5 | 1 | Tm1 |
| .....ggagaaaaaaaaaaaauA.....        | 1 | 1 | Tm1 |
| .....acucugaauaaccugcucucugu.....   | 1 | 0 | nt4 |
| .....ugcggugcaggggaauucagagg.....   | 1 | 0 | nt4 |
| .....gcccugcaggggaauucagaggga.....  | 1 | 0 | nt4 |
| .....cggugcaggggaauucagagg.....     | 1 | 0 | nt4 |
| .....cggugcaggggaauucagaggga.....   | 6 | 0 | nt4 |
| .....cggugcaggggaauucagaggag.....   | 8 | 0 | nt4 |
| .....aAaaaaaaaaaaaauuga.....        | 1 | 1 | em3 |
| .....gaggGgaaaaaaaaaaaa.....        | 2 | 1 | mm3 |
| .....aAaaaaaaaaaaaauuga.....        | 2 | 1 | mm3 |
| .....Aaaaaaaaaaaaauuga.....         | 2 | 1 | mm3 |
| .....aaaaaaaaaaaauugaAa.....        | 1 | 1 | mm3 |
| .....ugcggugcaggggaauucagagg.....   | 1 | 0 | th7 |
| .....ugcggugcaggggaauucagaggga..... | 1 | 0 | th7 |
| .....cggugcaggggaauucagagg.....     | 2 | 0 | th7 |
| .....cggugcaggggaauucagaggga.....   | 1 | 0 | th7 |
| .....cggugcaggggaauucagaggag.....   | 7 | 0 | th7 |
| .....cggugcaggggaauucagaggaga.....  | 2 | 0 | th7 |

cugagaaaccuaguGCCACUCUGAUAACCUCUCUCUGGAGAAACCAUGCggugcaggggaUUCAGAGGAGAAAAAAAAAAUUGAGAGGG

|                                     |   |   |     |
|-------------------------------------|---|---|-----|
| .....ccacucugaauaaccucucucu.....    | 1 | 0 | nct |
| .....ccacucugaauaaccucucucug.....   | 1 | 0 | nct |
| .....cggugcaggggaUUCAGAG.....       | 1 | 0 | nct |
| .....cggugcaggggaUUCAGAGGA.....     | 3 | 0 | nct |
| .....cggugcaggggaUUCAGAGGAG.....    | 1 | 0 | nct |
| .....augcggugcaggggaUUCAGAG.....    | 2 | 0 | Am1 |
| .....cggugcaggggaUUCAGAGGAGUaa..... | 1 | 1 | Am1 |
| .....gaggagaaaaUaaaa.....           | 1 | 1 | Am1 |
| .....aggagaaaaaaaaU.....            | 1 | 1 | Am1 |
| .....aggaAaaaaaaaaaaU.....          | 6 | 1 | Am1 |
| .....aggagaaaaaaaaGau.....          | 1 | 1 | Am1 |
| .....agAagaaaaaaaaaaU.....          | 1 | 1 | Am1 |
| .....aggaAaaaaaaaaaaU.....          | 1 | 1 | Am1 |
| .....ggagGaaaaaaaaaaU.....          | 2 | 1 | Am1 |
| .....AgagaaaaaaaaaaU.....           | 2 | 1 | Am1 |
| .....ggagaaaaaaaaaaC.....           | 1 | 1 | Am1 |
| .....ggGaaaaaaaaaaU.....            | 2 | 1 | Am1 |
| .....gagGaaaaaaaaaaU.....           | 1 | 1 | Am1 |
| .....aaaaaaaaaaUUGGgagg.....        | 2 | 1 | Am1 |

miRBase precursor : mmu\_chr7\_14452  
 Total read count : 81  
 mmu\_chr7\_14452 read count 66  
 mmu\_chr7\_14452\* read count 2  
 remaining reads : 3

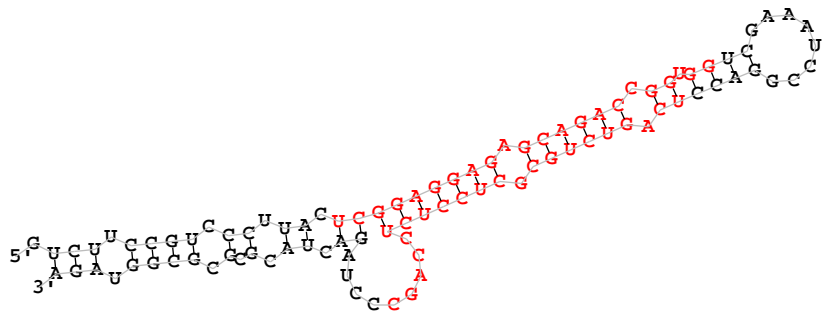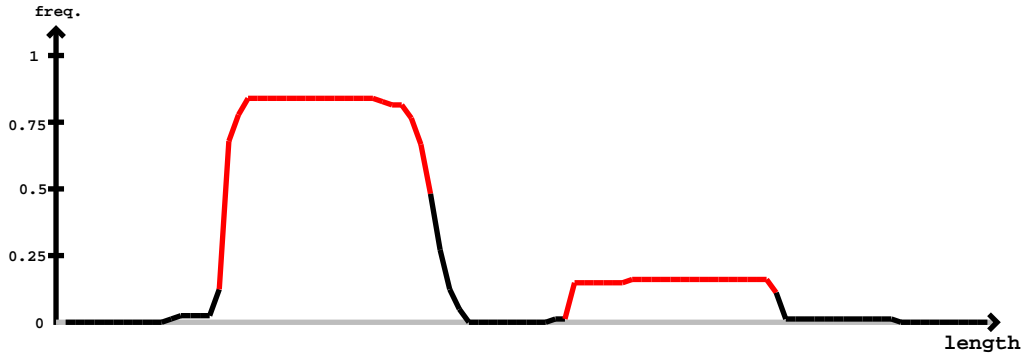

mmu\_chr7\_14452\*

| 5' -                                                                                         | mmu_chr7_14452 | -3' | exp | reads | mm | sample |
|----------------------------------------------------------------------------------------------|----------------|-----|-----|-------|----|--------|
| gucuuccguccuuacucggaggagagcagaccgguggucgaaauccggaccucagucugcgcuccuccagcccuagacuacgcgcggguaga |                |     |     |       |    |        |
| .....ggaggagagcagaccgguggu.....                                                              |                |     |     | 1     | 0  | nkc    |
| .....ucagucugcgcuccuccagU.....                                                               |                |     |     | 1     | 1  | ay3    |
| .....ucggaggagagcagaccgguggu.....                                                            |                |     |     | 1     | 0  | mdc    |
| .....ucggaggagagcagaccggug.....                                                              |                |     |     | 1     | 0  | 48t    |
| .....cggaggagagcagaccgguguc.....                                                             |                |     |     | 1     | 0  | 48t    |
| .....ggaggagagcagaccggugg.....                                                               |                |     |     | 2     | 0  | mzb    |
| .....ccuuacucggaggagagcagacc.....                                                            |                |     |     | 1     | 0  | mED    |
| .....cucggaggagagcagaccggug.....                                                             |                |     |     | 1     | 0  | gcb    |
| .....ucggaggagagcagaccggugg.....                                                             |                |     |     | 3     | 0  | gcb    |
| .....ucggaggagagcagaccggugU.....                                                             |                |     |     | 1     | 1  | ut2    |
| .....ucggaggagagcagaccgguggu.....                                                            |                |     |     | 1     | 0  | kdn    |
| .....cuuacucggaggagagcagacc.....                                                             |                |     |     | 1     | 0  | gc2    |
| .....ucggaggagagcagaccgggu.....                                                              |                |     |     | 1     | 0  | gc2    |
| .....ucggaggagagcagaccggugg.....                                                             |                |     |     | 1     | 0  | gc2    |
| .....cucggaggagagcagaccgguggu.....                                                           |                |     |     | 1     | 0  | sp2    |
| .....ucggaggagagcagaccgguggu.....                                                            |                |     |     | 1     | 0  | sp2    |
| .....cucggaggagagcagaccggug.....                                                             |                |     |     | 1     | 0  | nt2    |
| .....ucggaggagagcagaccggug.....                                                              |                |     |     | 2     | 0  | nt2    |
| .....cggaggagagcagaccgguguc.....                                                             |                |     |     | 1     | 0  | nt2    |
| .....ucggaggagagcagaccgg.....                                                                |                |     |     | 1     | 0  | skn    |
| .....ucggaggagagcagaccgg.....                                                                |                |     |     | 1     | 0  | itr    |

gucuuccgucuccuacucggaggagagcagaccgguggucgaaaucggaccucagucugcgcuccucuccagccuagacuacgcgcgguaga

|                                       |   |   |     |
|---------------------------------------|---|---|-----|
| .....ucggaggagagcagaccgguggu.....     | 1 | 0 | me8 |
| .....ucggaggagagcagaccgguggucU.....   | 1 | 1 | me8 |
| .....ucagucugcgcuccucuccaA.....       | 2 | 1 | me8 |
| .....ucagucugcgcuccucuccag.....       | 1 | 0 | me8 |
| .....ucagucugcgcuccucuccagc.....      | 1 | 0 | me8 |
| .....ucagucugcgcuccucuccagU.....      | 2 | 1 | me8 |
| .....cggaggagagcagaccgguggucU.....    | 1 | 1 | ut1 |
| .....ucggaggagagcagaccggugg.....      | 1 | 0 | c8t |
| .....ucagucugcgcuccucuccagU.....      | 1 | 1 | ay1 |
| .....ucggaggagagcagaccggugg.....      | 1 | 0 | Tm2 |
| .....cucggaggagagcagaccgguggucg.....  | 1 | 0 | ntr |
| .....ucggaggagagcagaccggugg.....      | 1 | 0 | ntr |
| .....ucggaggagagcagaccgguggu.....     | 3 | 0 | ntr |
| .....cucggaggagagcagaccgggu.....      | 1 | 0 | c4t |
| .....ucggaggagagcagaccgguggu.....     | 1 | 0 | c4t |
| .....ucagucugcgcuccucuccagU.....      | 2 | 1 | ay2 |
| .....ucggaggagagcagaccggug.....       | 1 | 0 | pob |
| .....ucggaggagagcagaccggugg.....      | 1 | 0 | pob |
| .....cggaggagagcagaccggugguc.....     | 1 | 0 | pob |
| .....cggaggagagcagaccgggu.....        | 1 | 0 | hi1 |
| .....cucggaggagagcagaccggugg.....     | 1 | 0 | peb |
| .....ucggaggagagcagaccgggu.....       | 1 | 0 | peb |
| .....ucggaggagagcagaccggug.....       | 2 | 0 | peb |
| .....ugcgcuccucuccagccuagacuacgc..... | 1 | 0 | tp1 |
| .....ucggaggagagcagaccgg.....         | 1 | 0 | sp1 |
| .....ucggaggagagcagaccggugg.....      | 1 | 0 | sp1 |
| .....ucggaggagagcagaccgguggucg.....   | 1 | 0 | sp1 |
| .....cggaggagagcagaccggugguc.....     | 1 | 0 | sp1 |
| .....cucggaggagagcagaccgguaA.....     | 1 | 1 | li2 |
| .....ggaggagagcagaccggug.....         | 1 | 0 | li2 |
| .....ucggaggagagcagaccgggu.....       | 1 | 0 | imb |
| .....ucggaggagagcagaccggug.....       | 1 | 0 | imb |
| .....ucggaggagagcagaccggugguc.....    | 1 | 0 | imb |
| .....cggaggagagcagaccgguggu.....      | 1 | 0 | imb |
| .....ggaggagagcagaccggugg.....        | 1 | 0 | imb |
| .....ucagucugcgcuccucuccag.....       | 1 | 0 | imb |
| .....ucggaggagagcagaccgggu.....       | 1 | 0 | th2 |
| .....ucggaggagagcagaccggug.....       | 3 | 0 | th2 |
| .....ucggaggagagcagaccgguggu.....     | 1 | 0 | th2 |
| .....ucggaggagagcagaccggugguc.....    | 1 | 0 | th2 |
| .....cucggaggagagcagaccggugg.....     | 1 | 0 | nt4 |
| .....ucggaggagagcagaccgg.....         | 1 | 0 | nt4 |
| .....cggaggagagcagaccggugg.....       | 1 | 0 | nt4 |
| .....ucggaggagagcagaccgggu.....       | 1 | 0 | th7 |
| .....ucggaggagagcagaccggug.....       | 1 | 0 | th7 |
| .....ucggaggagagcagaccggugg.....      | 1 | 0 | th7 |
| .....ucggaggagagcagaccgggu.....       | 1 | 0 | cx1 |
| .....ccucagucugcgcuccucuccagU.....    | 1 | 1 | cx1 |





Mature

Star

|                                                                                                                      |    |   |     |
|----------------------------------------------------------------------------------------------------------------------|----|---|-----|
| uugaguucucaaccggugacacucaaaaaccuggcggcacuuuuuuuuuuccgaugaaaauccaaagagccccaguuugaguauucacaggcuggaggucuaagcuuaagaacaau |    |   |     |
| .....acucaaaaaccuggcggcacuuuu.....                                                                                   | 8  | 0 | sg1 |
| .....acucaaaaaccuggcggcacuuuu.....                                                                                   | 1  | 0 | bm2 |
| .....cacucaaaaaccuggcggcacuuuu.....                                                                                  | 2  | 0 | nt1 |
| .....acucaaaaaccuggcggcacu.....                                                                                      | 1  | 0 | nt1 |
| .....acucaaaaaccuggcggcacuu.....                                                                                     | 2  | 0 | nt1 |
| .....acucaaaaaccuggcggcacuuu.....                                                                                    | 2  | 0 | nt1 |
| .....acucaaaaaccuggcggcacuuuu.....                                                                                   | 15 | 0 | nt1 |
| .....aaaaccuggcggcacuuuu.....                                                                                        | 1  | 0 | nt1 |
| .....aagagccccaguuugaguauU.....                                                                                      | 1  | 1 | hr3 |
| .....cacucaaaaaccuggcggcacuuuu.....                                                                                  | 1  | 0 | lun |
| .....acucaaaaaccuggcggcacuuuu.....                                                                                   | 3  | 0 | th7 |
| .....acucaaaaaccuggcggcacuuu.....                                                                                    | 1  | 0 | ut1 |
| .....cacucaaaaaccuggcggcacuuuu.....                                                                                  | 1  | 0 | c8t |
| .....acucaaaaaccuggcggcacuuu.....                                                                                    | 1  | 0 | c8t |
| .....acucaaaaaccuggcggcacuuuu.....                                                                                   | 8  | 0 | c8t |
| .....acucaaaaaccuggcggcacuuu.....                                                                                    | 1  | 0 | je1 |
| .....cacucaaaaaccuggcggcacuuu.....                                                                                   | 1  | 0 | li3 |
| .....acucaaaaaccuggcggcacuuu.....                                                                                    | 2  | 0 | li3 |
| .....acucaaaaaccuggcggcacuuuu.....                                                                                   | 10 | 0 | li3 |
| .....aggcuggagguaagcu.....                                                                                           | 1  | 1 | Aml |



uagcaucugcuuccugaccaggcgacuucugcuucccuuccacuggaccuggggcuggggcgcuuuccugucugcucggggcacuguaagagaagaagagccgcaucugccuuu

|                                               |     |   |     |
|-----------------------------------------------|-----|---|-----|
| .....ccuuccacugUaccuggggcugggc.....           | 1   | 1 | Tm2 |
| .....ccuuccacuggaccuggggcugggAc.....          | 1   | 1 | Tm2 |
| .....ccuuccacuggaccuggggcCgggc.....           | 2   | 1 | Tm2 |
| .....ccuuccacCggaccuggggcugggc.....           | 1   | 1 | Tm2 |
| .....ccuuccacuggaccuggggCcugggc.....          | 1   | 1 | Tm2 |
| .....ccuuccacuggaccuggggcuggCgc.....          | 1   | 1 | Tm2 |
| .....ccuuccCcuggaccuggggcugggc.....           | 1   | 1 | Tm2 |
| .....ccuuccacuggaccuggggAuagggc.....          | 1   | 1 | Tm2 |
| .....ccuuccacuggaccuggggcugggG.....           | 1   | 1 | Tm2 |
| .....ccuuccacuggaccuggggcugggcU.....          | 1   | 1 | Tm2 |
| .....ccuuccacuggaccuggggcugggcguuuccuguc..... | 1   | 0 | Tm2 |
| .....ccuuccacuggaccuggggcugggcguuuccuguU..... | 1   | 1 | Tm2 |
| .....ccuuccacuggaccuggggcugggcguuuccuguA..... | 5   | 1 | Tm2 |
| .....ccacuggaccuggggcugggc.....               | 1   | 0 | Tm2 |
| .....cuggaccuggggcugggc.....                  | 1   | 0 | Tm2 |
| .....cuggaccuggggcugggc.....                  | 1   | 0 | Tm2 |
| .....uggaccuggggcugggc.....                   | 1   | 0 | Tm2 |
| .....gcuuuccugucugcucggggcacuguaagaga.....    | 1   | 0 | Tm2 |
| .....cugcucggggcacuguaa.....                  | 1   | 0 | Tm2 |
| .....cugcucggggcacuguaaga.....                | 6   | 0 | Tm2 |
| .....cugcuAggggcacuguaagag.....               | 1   | 1 | Tm2 |
| .....cugcucggggcacuguaagag.....               | 14  | 0 | Tm2 |
| .....cugcucgUgggcacuguaagaga.....             | 3   | 1 | Tm2 |
| .....cugcucggggcacuguaagaga.....              | 268 | 0 | Tm2 |
| .....cugcucggggcacuguaagUga.....              | 1   | 1 | Tm2 |
| .....cugcucggCgcacuguaagaga.....              | 1   | 1 | Tm2 |
| .....cugcucggggcacugGaagaga.....              | 1   | 1 | Tm2 |
| .....cugcucggggAacuguaagaga.....              | 3   | 1 | Tm2 |
| .....cugcuDggggcacuguaagaga.....              | 1   | 1 | Tm2 |
| .....cugcucggggcacuguaagagU.....              | 4   | 1 | Tm2 |
| .....cugcucgCgggcacuguaagaga.....             | 1   | 1 | Tm2 |
| .....Augcucggggcacuguaagaga.....              | 1   | 1 | Tm2 |
| .....cugcucggUgcacuguaagaga.....              | 1   | 1 | Tm2 |
| .....Uugcucggggcacuguaagaga.....              | 1   | 1 | Tm2 |
| .....cugcCggggcacuguaagaga.....               | 1   | 1 | Tm2 |
| .....cugcucggggcacuguaagagaU.....             | 1   | 1 | Tm2 |
| .....ugcucggggcacuguaaga.....                 | 2   | 0 | Tm2 |
| .....ugcucggggcacuguCagaga.....               | 1   | 1 | Tm2 |
| .....ugcucggggcacuguaagagU.....               | 1   | 1 | Tm2 |
| .....ugcucggggcacuguaagaga.....               | 4   | 0 | Tm2 |
| .....gcuuggggcacuguaagaga.....                | 1   | 0 | Tm2 |
| .....cucggggcacuguaagagaaga.....              | 1   | 0 | Tm2 |
| .....ucggggcacuguaagaga.....                  | 1   | 0 | Tm2 |
| .....ucggggcacuguaagagaag.....                | 2   | 0 | Tm2 |
| .....ucggggcacuguaagagaaga.....               | 9   | 0 | Tm2 |
| .....ucggggcacuguaagagaagaa.....              | 1   | 0 | Tm2 |
| .....cgAgggcacuguaagagaa.....                 | 1   | 1 | Tm2 |
| .....ugaccaggcgacuucugcuuc.....               | 4   | 0 | te1 |
| .....cuuccugaccaggcgacuucugcuuc.....          | 1   | 0 | Tm1 |
| .....uccugaccaggcgacuucugcuuc.....            | 2   | 0 | Tm1 |
| .....ccugaccaggcgacuucugcuuc.....             | 2   | 0 | Tm1 |
| .....cugaccaggcgacuucugcuuc.....              | 1   | 0 | Tm1 |
| .....ugaccaggcgacuucugcuuc.....               | 3   | 0 | Tm1 |
| .....gaccaggcgacuucugcuuc.....                | 19  | 0 | Tm1 |
| .....gaccaggcgacuucugUuuc.....                | 1   | 1 | Tm1 |
| .....caggcgacuucugcuuc.....                   | 2   | 0 | Tm1 |
| .....ccuuccacuggaccuggggc.....                | 1   | 0 | Tm1 |
| .....ccuuccacuggaccuggggcugg.....             | 6   | 0 | Tm1 |
| .....ccuuccacuggaccuggggcuggg.....            | 3   | 0 | Tm1 |
| .....ccuuccacuggUccuggggcugggc.....           | 1   | 1 | Tm1 |
| .....ccuuccacugUaccuggggcugggc.....           | 1   | 1 | Tm1 |
| .....ccuuccacuggaccuUgggcugggc.....           | 1   | 1 | Tm1 |
| .....ccuuccacuggaccuggggcugggc.....           | 234 | 0 | Tm1 |
| .....ccuuccacCggaccuggggcugggc.....           | 1   | 1 | Tm1 |
| .....ccuuccacCggaccuggggcugggc.....           | 1   | 1 | Tm1 |
| .....ccuuccaUggaccuggggcugggc.....            | 1   | 1 | Tm1 |
| .....cUuuccacuggaccuggggcugggc.....           | 1   | 1 | Tm1 |

uagcaucugcuuccugaccaggcgacuucugcuucccuuccacuggaccuggggcggcgcuuuccugucugcucggggcacuguaagagaagaagagccgcaucgcccuuu

|                                               |     |   |     |
|-----------------------------------------------|-----|---|-----|
| .....ccuuccacuggaccugggUcugggc.....           | 1   | 1 | Tm1 |
| .....ccuucUacuggaccuggggcugggc.....           | 1   | 1 | Tm1 |
| .....ccuuccacuggaccuggggcugggA.....           | 1   | 1 | Tm1 |
| .....ccuuccacuggaccugggCcugggc.....           | 1   | 1 | Tm1 |
| .....ccuuccacuggaccuggUcugggc.....            | 2   | 1 | Tm1 |
| .....ccuuccacuggaccuggggcugggU.....           | 1   | 1 | Tm1 |
| .....ccuuccacuggaccuggggcuUggc.....           | 1   | 1 | Tm1 |
| .....ccuuccacuggacUuggggcugggc.....           | 2   | 1 | Tm1 |
| .....ccuAccacuggaccuggggcugggc.....           | 1   | 1 | Tm1 |
| .....ccuuccacuggaUcuggggcugggc.....           | 2   | 1 | Tm1 |
| .....cuuccacuggaccuggggcugggc.....            | 1   | 0 | Tm1 |
| .....cCuccacuggaccuggggcugggc.....            | 1   | 1 | Tm1 |
| .....uuccacuggaccuggggc.....                  | 1   | 0 | Tm1 |
| .....Cccacuggaccuggggcugggc.....              | 1   | 1 | Tm1 |
| .....cacuggaccuggggcugggc.....                | 2   | 0 | Tm1 |
| .....acuggaccuggggcuggg.....                  | 1   | 0 | Tm1 |
| .....cuggaccuggggcuggg.....                   | 1   | 0 | Tm1 |
| .....uggaccuggggcugggc.....                   | 1   | 0 | Tm1 |
| .....gucugcucggggcacuguaaga.....              | 1   | 0 | Tm1 |
| .....ucugcucggggcacuguaagaga.....             | 1   | 0 | Tm1 |
| .....cugcucggggcacuguaag.....                 | 1   | 0 | Tm1 |
| .....cugcucggggcacuguaaga.....                | 9   | 0 | Tm1 |
| .....cugcucggggcacuguaagaU.....               | 1   | 1 | Tm1 |
| .....cugcucggggcacuguaagag.....               | 7   | 0 | Tm1 |
| .....cugcucggggGacuguaagaga.....              | 1   | 1 | Tm1 |
| .....cugcucgggUgcacuguaagaga.....             | 2   | 1 | Tm1 |
| .....cugcucggggcacuguaagagC.....              | 1   | 1 | Tm1 |
| .....cugcuAggggcacuguaagaga.....              | 1   | 1 | Tm1 |
| .....cGgcucggggcacuguaagaga.....              | 1   | 1 | Tm1 |
| .....cugcucggggcacuguGagaga.....              | 1   | 1 | Tm1 |
| .....cugUcggggcacuguaagaga.....               | 2   | 1 | Tm1 |
| .....cugcucUggggcacuguaagaga.....             | 2   | 1 | Tm1 |
| .....cuCucggggcacuguaagaga.....               | 1   | 1 | Tm1 |
| .....cugcucCggggcacuguaagaga.....             | 1   | 1 | Tm1 |
| .....cugcuUggggcacuguaagaga.....              | 1   | 1 | Tm1 |
| .....cugcucggggcGcuguaagaga.....              | 1   | 1 | Tm1 |
| .....cugcucggggcacugAaagaga.....              | 1   | 1 | Tm1 |
| .....cugcucggggcaUuguaagaga.....              | 4   | 1 | Tm1 |
| .....Uugcucggggcacuguaagaga.....              | 1   | 1 | Tm1 |
| .....cugcucggggcacuguaaUaga.....              | 1   | 1 | Tm1 |
| .....cugcucggggcacuguaagaga.....              | 448 | 0 | Tm1 |
| .....cugcucggggcacuguaagagU.....              | 5   | 1 | Tm1 |
| .....cugcucgggCcacuguaagaga.....              | 1   | 1 | Tm1 |
| .....cugcucggggcacuguaagUga.....              | 1   | 1 | Tm1 |
| .....cugcucggggcacuguaagagaU.....             | 2   | 1 | Tm1 |
| .....ugcucggggcacuguaagaga.....               | 1   | 0 | Tm1 |
| .....ugcucggggcacuguaagagU.....               | 1   | 1 | Tm1 |
| .....cuGggggcacuguaagaga.....                 | 1   | 1 | Tm1 |
| .....cucggggcacuguaagaga.....                 | 2   | 0 | Tm1 |
| .....cucggggcacuguaagagaaga.....              | 1   | 0 | Tm1 |
| .....ucggggcacuguaagaga.....                  | 1   | 0 | Tm1 |
| .....ucggggcacuguaagagaag.....                | 3   | 0 | Tm1 |
| .....ucggggcacuguaagagaaga.....               | 11  | 0 | Tm1 |
| .....ucggggcacuguaagagaagaa.....              | 2   | 0 | Tm1 |
| .....cggggcacuguaagaga.....                   | 1   | 0 | Tm1 |
| .....ccuuccacuggaccuggggcugggc.....           | 1   | 0 | SSC |
| .....ccuuccacuggaccuggggcugggcguuuccuguc..... | 1   | 0 | SSC |
| .....cugcucggggcacuguaagagG.....              | 1   | 1 | SSC |
| .....cugcucggggcacuguaagaga.....              | 1   | 0 | SSC |
| .....ugaccaggcgacuucugcuuc.....               | 1   | 0 | Tp2 |
| .....ccuuccacuggaccuggggcuggg.....            | 1   | 0 | Tp2 |
| .....ccuuccacuggaccuggggcugggc.....           | 14  | 0 | Tp2 |
| .....ccuuccacuggaccuggggcuggUc.....           | 1   | 1 | Tp2 |
| .....cugcucggggcacuguaagag.....               | 1   | 0 | Tp2 |
| .....cugcucggggcacuguaagaga.....              | 30  | 0 | Tp2 |
| .....cugcuAggggcacuguaagaga.....              | 1   | 1 | Tp2 |
| .....cugcucggggcCcuguaagaga.....              | 1   | 1 | Tp2 |

uagcaucugcuuccugaccaggcgacuucugcuucccuuccacuggaccuggggcuggggcgcuuuccugucugcucggggcacuguaagagaagaagagccgcacugccuuu

|                                     |    |   |     |
|-------------------------------------|----|---|-----|
| .....ccugaccaggcgacuucugcuuc.....   | 1  | 0 | te2 |
| .....cugaccaggcgacuucugcu.....      | 1  | 0 | te2 |
| .....ugaccaggcgacuucugcuuc.....     | 1  | 0 | te2 |
| .....gaccaggcgacuucugcuuc.....      | 1  | 0 | te2 |
| .....ugaccaggcgacuucugcuuc.....     | 1  | 0 | tp1 |
| .....ccuuccacuggaccuggggcugggc..... | 3  | 0 | tp1 |
| .....cugcucggggcacuguaagaga.....    | 15 | 0 | tp1 |
| .....ucggggcacuguaagagaag.....      | 1  | 0 | tp1 |
| .....ucggggcacuguaagagaaga.....     | 1  | 0 | tp1 |
| .....ucggggcacuguaagagaagaa.....    | 1  | 0 | tp1 |







Provisional ID : chr8\_21975  
 Score total : 50.5  
 Score for star read(s) : 3.9  
 Score for read counts : 43  
 Score for mfe : 2.6  
 Score for randfold : 1.6  
 Score for cons. seed : -0.6  
 Total read count : 96  
 Mature read count : 20  
 Loop read count : 0  
 Star read count : 76

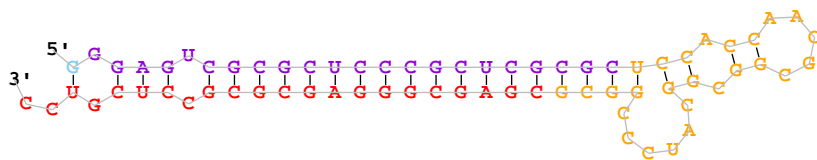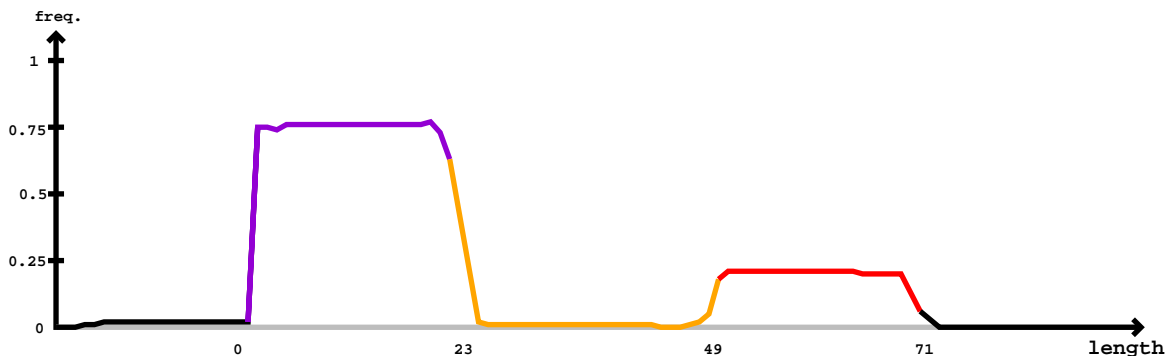

**Star**

**Mature**

| 5'                                      | 3'                                            | obs | exp | reads | mm | sample |
|-----------------------------------------|-----------------------------------------------|-----|-----|-------|----|--------|
| gcaaacggaaccggcgccgggagucgcgccccgcucgcu | uccaccaacgcgggcggaucuccggcgagcgggagcgcgcucguc | 1   | 1   | 1     | 1  | E15    |
| ggagucgcgccccgcucgcu                    | ggagucgcgccccgcucgcu                          | 1   | 0   | 1     | 0  | nkc    |
| cgagcgggagcgcgcucgucU                   | cgagcgggagcgcgcucgucU                         | 1   | 1   | 1     | 1  | 3T3    |
| ggagucgcgccccgcucgc                     | ggagucgcgccccgcucgc                           | 1   | 0   | 1     | 0  | CFU    |
| ggagucgcgccccgcucUcg                    | ggagucgcgccccgcucUcg                          | 1   | 1   | 1     | 1  | CFU    |
| ggagucgcgccccgcucgA                     | ggagucgcgccccgcucgA                           | 3   | 1   | 3     | 1  | CFU    |
| ggagucgcgccccgcucgU                     | ggagucgcgccccgcucgU                           | 1   | 1   | 1     | 1  | CFU    |
| gucgcgccccgcucgcgC                      | gucgcgccccgcucgcgC                            | 2   | 0   | 2     | 0  | CFU    |
| gcgcgUgcgggagcgcgc                      | gcgcgUgcgggagcgcgc                            | 1   | 1   | 1     | 1  | CFU    |
| ggagucgcgccccgcucgU                     | ggagucgcgccccgcucgU                           | 1   | 1   | 1     | 1  | SSC    |
| ggagucgcgccccgcucgA                     | ggagucgcgccccgcucgA                           | 1   | 1   | 1     | 1  | SSC    |
| aacggaaccggcgccggg                      | aacggaaccggcgccggg                            | 1   | 0   | 1     | 0  | mED    |
| ggagucgcgccccgcucg                      | ggagucgcgccccgcucg                            | 1   | 0   | 1     | 0  | mzb    |
| ggagucgcgccccgcucgcg                    | ggagucgcgccccgcucgcg                          | 1   | 0   | 1     | 0  | mzb    |
| ggagucgcgccccgcucgcu                    | ggagucgcgccccgcucgcu                          | 1   | 0   | 1     | 0  | gcb    |
| ggagucgcgccccgcucgc                     | ggagucgcgccccgcucgc                           | 1   | 0   | 1     | 0  | t11    |
| ggagucgcgccccgcucgU                     | ggagucgcgccccgcucgU                           | 1   | 1   | 1     | 1  | t11    |
| ggagucgcgccccgcucgcg                    | ggagucgcgccccgcucgcg                          | 2   | 0   | 2     | 0  | gc2    |
| ggagucgcgccccgcucgA                     | ggagucgcgccccgcucgA                           | 2   | 1   | 2     | 1  | Am2    |
| ggagucgcgccccgcucgcu                    | ggagucgcgccccgcucgcu                          | 2   | 0   | 2     | 0  | Am2    |
| ggagucgcgccccgcucg                      | ggagucgcgccccgcucg                            | 1   | 0   | 1     | 0  | nt2    |
| ggagucgcgccccgcucgcgC                   | ggagucgcgccccgcucgcgC                         | 1   | 0   | 1     | 0  | nt2    |

Star

Mature

gcaaacggaaccggcggcgggagucgcgccccgcgucuccaccaaaccgcgccgcaucccggcgcgagcgggagcgcgcucgucuccgcccgcaccgcaucgacaucu

|                                   |   |   |     |
|-----------------------------------|---|---|-----|
| .....ggagucgcgccccgcucgc.....     | 1 | 0 | itr |
| .....ggagucgcgccccgcucgcgA.....   | 3 | 1 | em2 |
| .....ggagucgcgccccgcucgc.....     | 1 | 0 | bm2 |
| .....ggagucgcgccccgcucgcg.....    | 1 | 0 | bm2 |
| .....ggagucgcgccccgcucgcgA.....   | 1 | 1 | hl2 |
| .....ggagucgcgccccgcucgcgU.....   | 1 | 1 | ut1 |
| .....ggagucgcgccccgcucgcg.....    | 1 | 0 | c8t |
| .....ggagucgcgccccgcucgcgA.....   | 1 | 1 | ov2 |
| .....Ugagucgcgccccgcucgcg.....    | 1 | 1 | Tm2 |
| .....ggagucgcgccccgcucgcgU.....   | 1 | 1 | hi2 |
| .....ggagucgcgccccgcucgcgU.....   | 1 | 1 | em1 |
| .....ggagucgcgccccgcucgcg.....    | 1 | 0 | mm2 |
| .....ggagucgcgccccgcucgcgU.....   | 2 | 1 | mm2 |
| .....ggagucgcgccccgcucgcgC.....   | 1 | 0 | mm2 |
| .....ggagucgcgccccgcucgcgAu.....  | 1 | 1 | hr3 |
| .....ggagucgcgccccgcucg.....      | 1 | 0 | c4t |
| .....ggagucgcgccccgcucgc.....     | 1 | 0 | c4t |
| .....ggagucgcgccccgcucgcg.....    | 3 | 0 | c4t |
| .....cgagcgggagcgcgcucguc.....    | 1 | 0 | c4t |
| .....ggagucgcgccccgcucgcgA.....   | 1 | 1 | ay2 |
| .....ggagucgcgccccgcucgcgAu.....  | 1 | 1 | hr2 |
| .....ggagucgcgccccgcucgcg.....    | 1 | 0 | pob |
| .....ggagucgcgccccgcucgcgC.....   | 1 | 0 | peb |
| .....cgagcgggagcgcgcucgu.....     | 1 | 0 | peb |
| .....ggagucgcgccccgcucgcgU.....   | 1 | 1 | Tp1 |
| .....ggagucgcgccccgcucgc.....     | 1 | 0 | mE1 |
| .....ggagucgcgccccgcucgcgC.....   | 1 | 0 | mE1 |
| .....gucgccccgcucgcgC.....        | 1 | 0 | mE1 |
| .....ggagucgcgccccgcucg.....      | 1 | 0 | nb3 |
| .....caaacggaaccggcggcggga.....   | 1 | 0 | bac |
| .....cgcgagcgggagcgcgcucguc.....  | 1 | 0 | bac |
| .....cgagcgggagcgcgcucguc.....    | 1 | 0 | ool |
| .....ggagucgcgccccgcucgcgA.....   | 2 | 1 | 3Ta |
| .....ggagucgcgccccgcucgcgC.....   | 1 | 0 | sp1 |
| .....gcgagcgggagcgcgcucgu.....    | 2 | 0 | li1 |
| .....gcgagcgggagcgcgcucguU.....   | 1 | 1 | li1 |
| .....cgagcgggagcgcgcucguc.....    | 3 | 0 | li1 |
| .....cgagcgggagcgcgcucguc.....    | 3 | 0 | li1 |
| .....gagcgggaUcgcgcucgu.....      | 1 | 1 | li1 |
| .....ggagucgcgccccgcucgcgAuc..... | 1 | 1 | pgr |
| .....gcgcuccaccaaaccgcgUcauc..... | 1 | 1 | pgr |
| .....ggagucgcgccccgcucgcgCA.....  | 1 | 1 | li2 |
| .....cgagcgggagcgcgcucguc.....    | 1 | 0 | li2 |

Star

Mature

|                                                                                                               |   |   |     |
|---------------------------------------------------------------------------------------------------------------|---|---|-----|
| gcaaacggaaccggcggcgggagucgcgucuccgucgcgucuccacccaacgcgcgcaucccgcgcgagcgggagcgcgcucgucuccgcccgcaccgcaucgacaucu |   |   |     |
| .....cgagcgggagcgcgcucguc.....                                                                                | 1 | 0 | li2 |
| .....gagcgggagcgcgcucguc.....                                                                                 | 2 | 0 | li2 |
| .....ggagucgcgucuccgucgcg.....                                                                                | 1 | 0 | imb |
| .....ggagucgcgucuccgucgcg.....                                                                                | 1 | 0 | imb |
| .....ggagucgcgucuccgucgcg.....                                                                                | 1 | 0 | th2 |
| .....ggagucgcgucuccgucgcg.....                                                                                | 1 | 0 | th2 |
| .....ggagucgcgucuccgucgcgU.....                                                                               | 1 | 1 | em3 |
| .....ggagucgcgucuccgucgcg.....                                                                                | 2 | 0 | mm3 |
| .....ggagucgcgucuccgucgcg.....                                                                                | 1 | 0 | mm3 |
| .....ggagucgcgucuccgucgcg.....                                                                                | 1 | 0 | th7 |
| .....cgagcgggagcgcgcucguc.....                                                                                | 1 | 0 | th7 |
| .....ggagucgcgucuccgucgcg.....                                                                                | 1 | 0 | nct |
| .....ggagucgcgucuccgucgcgA.....                                                                               | 1 | 1 | cx1 |
| .....ggagucgcgucuccgucgcgA.....                                                                               | 2 | 1 | Am1 |
| .....ggagucgcgucuccgucgcgcu.....                                                                              | 1 | 0 | Am1 |



Star

Mature

|                                     |                        |                           |          |                       |    |   |     |
|-------------------------------------|------------------------|---------------------------|----------|-----------------------|----|---|-----|
| ggugcuggagcucggagcggaccgccgguccuccg | guagcccgggcgguugcuuccc | gagagucgcccggggaugcagcgca | cgggcgag | agaagcucaaagcuucccaag |    |   |     |
| .....                               | .....                  | .....                     | .....    | .....                 | 5  | 0 | gcb |
| .....                               | .....                  | .....                     | .....    | .....                 | 1  | 0 | ut2 |
| .....                               | .....                  | .....                     | .....    | .....                 | 1  | 1 | ut2 |
| .....                               | .....                  | .....                     | .....    | .....                 | 1  | 1 | ut2 |
| .....                               | .....                  | .....                     | .....    | .....                 | 1  | 1 | ut2 |
| .....                               | .....                  | .....                     | .....    | .....                 | 1  | 1 | ut2 |
| .....                               | .....                  | .....                     | .....    | .....                 | 2  | 1 | ut2 |
| .....                               | .....                  | .....                     | .....    | .....                 | 1  | 1 | ut2 |
| .....                               | .....                  | .....                     | .....    | .....                 | 5  | 1 | ut2 |
| .....                               | .....                  | .....                     | .....    | .....                 | 3  | 0 | ut2 |
| .....                               | .....                  | .....                     | .....    | .....                 | 1  | 1 | ut2 |
| .....                               | .....                  | .....                     | .....    | .....                 | 1  | 0 | kdn |
| .....                               | .....                  | .....                     | .....    | .....                 | 1  | 0 | kdn |
| .....                               | .....                  | .....                     | .....    | .....                 | 1  | 0 | kdn |
| .....                               | .....                  | .....                     | .....    | .....                 | 1  | 0 | kdn |
| .....                               | .....                  | .....                     | .....    | .....                 | 1  | 0 | kdn |
| .....                               | .....                  | .....                     | .....    | .....                 | 1  | 0 | h11 |
| .....                               | .....                  | .....                     | .....    | .....                 | 3  | 1 | h11 |
| .....                               | .....                  | .....                     | .....    | .....                 | 1  | 1 | h1c |
| .....                               | .....                  | .....                     | .....    | .....                 | 1  | 1 | h1c |
| .....                               | .....                  | .....                     | .....    | .....                 | 1  | 1 | h1c |
| .....                               | .....                  | .....                     | .....    | .....                 | 10 | 1 | h1c |
| .....                               | .....                  | .....                     | .....    | .....                 | 1  | 1 | h1c |
| .....                               | .....                  | .....                     | .....    | .....                 | 1  | 1 | h1c |
| .....                               | .....                  | .....                     | .....    | .....                 | 1  | 0 | mus |
| .....                               | .....                  | .....                     | .....    | .....                 | 1  | 0 | mus |
| .....                               | .....                  | .....                     | .....    | .....                 | 2  | 0 | itr |
| .....                               | .....                  | .....                     | .....    | .....                 | 7  | 0 | itr |
| .....                               | .....                  | .....                     | .....    | .....                 | 5  | 0 | itr |
| .....                               | .....                  | .....                     | .....    | .....                 | 4  | 0 | itr |
| .....                               | .....                  | .....                     | .....    | .....                 | 1  | 1 | em2 |
| .....                               | .....                  | .....                     | .....    | .....                 | 1  | 0 | bm2 |
| .....                               | .....                  | .....                     | .....    | .....                 | 3  | 0 | bm2 |
| .....                               | .....                  | .....                     | .....    | .....                 | 1  | 0 | bm2 |
| .....                               | .....                  | .....                     | .....    | .....                 | 1  | 0 | bm2 |
| .....                               | .....                  | .....                     | .....    | .....                 | 1  | 1 | br2 |
| .....                               | .....                  | .....                     | .....    | .....                 | 1  | 1 | br2 |
| .....                               | .....                  | .....                     | .....    | .....                 | 1  | 1 | Tm2 |
| .....                               | .....                  | .....                     | .....    | .....                 | 1  | 0 | hi2 |
| .....                               | .....                  | .....                     | .....    | .....                 | 1  | 1 | hi2 |
| .....                               | .....                  | .....                     | .....    | .....                 | 1  | 0 | hi2 |
| .....                               | .....                  | .....                     | .....    | .....                 | 1  | 0 | hi2 |
| .....                               | .....                  | .....                     | .....    | .....                 | 1  | 0 | em1 |
| .....                               | .....                  | .....                     | .....    | .....                 | 1  | 0 | em1 |
| .....                               | .....                  | .....                     | .....    | .....                 | 13 | 0 | ntr |
| .....                               | .....                  | .....                     | .....    | .....                 | 1  | 0 | ntr |
| .....                               | .....                  | .....                     | .....    | .....                 | 7  | 0 | ntr |
| .....                               | .....                  | .....                     | .....    | .....                 | 1  | 0 | ntr |
| .....                               | .....                  | .....                     | .....    | .....                 | 1  | 1 | hr3 |
| .....                               | .....                  | .....                     | .....    | .....                 | 1  | 1 | ay2 |
| .....                               | .....                  | .....                     | .....    | .....                 | 1  | 0 | hi1 |
| .....                               | .....                  | .....                     | .....    | .....                 | 1  | 1 | hi1 |
| .....                               | .....                  | .....                     | .....    | .....                 | 1  | 1 | hi1 |
| .....                               | .....                  | .....                     | .....    | .....                 | 1  | 0 | tp2 |

Star

Mature

|                                                                                                                 |    |   |     |
|-----------------------------------------------------------------------------------------------------------------|----|---|-----|
| ggugcuggagcucggagcggaccgccggucucccgagaccggggcggugcuccccgagagucgcccggggaugcagcgcacggggcgagagaagcuccaaagcuucccaag |    |   |     |
| .gugcuggagcucggagcggaccgcg.....                                                                                 | 1  | 0 | TP2 |
| .....gaucagcgcacggggcgaga.....                                                                                  | 1  | 0 | TP1 |
| .....gaucagcgcacggggcgagagU.....                                                                                | 2  | 1 | TP1 |
| .....aucagcgcacggggcgag.....                                                                                    | 1  | 0 | TP1 |
| .....gaucagcgcacggggcgagag.....                                                                                 | 1  | 0 | nb3 |
| .....gaucagcgcacggggcgag.....                                                                                   | 2  | 0 | bac |
| .....gaucagcgcacggggcgaga.....                                                                                  | 1  | 0 | bac |
| .....gaucagcgcacggggcgagag.....                                                                                 | 1  | 0 | bac |
| .....gaucagcgcacggggcgagaga.....                                                                                | 2  | 0 | bac |
| .....gaucagcgcacggggcgag.....                                                                                   | 2  | 0 | sp1 |
| .....gaucagcgcacggggcgaga.....                                                                                  | 1  | 0 | sp1 |
| .....gaucagcgcacggggcgagag.....                                                                                 | 7  | 0 | sp1 |
| .....aucagcgcacggggcgagagaag.....                                                                               | 1  | 0 | sp1 |
| .....ugggaucagcgcacggggcga.....                                                                                 | 1  | 0 | 3Ta |
| .....Cggaucagcgcacggggcgaga.....                                                                                | 1  | 1 | 3Ta |
| .....ggaucagcgcacggggcgaga.....                                                                                 | 1  | 0 | 3Ta |
| .....gaucagcgcacggggcgaga.....                                                                                  | 4  | 0 | 3Ta |
| .....gaucagcgcacggggcgagag.....                                                                                 | 2  | 0 | 3Ta |
| .....gaucagcgcacggggcgagaU.....                                                                                 | 1  | 1 | 3Ta |
| .....gaucagcCcacggggcgagag.....                                                                                 | 1  | 1 | 3Ta |
| .....gaucagcgcacggggcgagaga.....                                                                                | 1  | 0 | 3Ta |
| .....gaucagcgcacggggcgagagU.....                                                                                | 14 | 1 | 3Ta |
| .....gaucagcgcacggggcgagagaU.....                                                                               | 1  | 1 | 3Ta |
| .....gaucagcgcacggggcgagagUa.....                                                                               | 3  | 1 | 3Ta |
| .....cucggagcggaccgccggucucc.....                                                                               | 1  | 0 | li2 |
| .....uuccccgaUagucgccguggau.....                                                                                | 1  | 1 | li2 |
| .....gaucagcgcacggggcgagag.....                                                                                 | 1  | 0 | li2 |
| .....gaucagcgcacggggcgagaU.....                                                                                 | 1  | 1 | li2 |
| .....gaucagcgcacggggcgagagU.....                                                                                | 2  | 1 | li2 |
| .....gaucagcgcacggggcgagaa.....                                                                                 | 1  | 1 | li2 |
| .....gaucagcgcacggggcgag.....                                                                                   | 3  | 0 | imb |
| .....gaucagcgcacggggcgaga.....                                                                                  | 8  | 0 | imb |
| .....gaucagcgcacggggcgagag.....                                                                                 | 25 | 0 | imb |
| .....gaucagcgcacggggcgagaga.....                                                                                | 5  | 0 | imb |
| .....gaucagcgcacggggcgagagaa.....                                                                               | 2  | 0 | imb |
| .....ggaucagcgcacggggcgag.....                                                                                  | 1  | 0 | bm1 |
| .....gaucagcgcacggggcgag.....                                                                                   | 6  | 0 | bm1 |
| .....gaucagcgcacggggcgaga.....                                                                                  | 2  | 0 | bm1 |
| .....gaucagcgcacggggcgagag.....                                                                                 | 7  | 0 | bm1 |
| .....gaucagcgcacggggcgagaga.....                                                                                | 5  | 0 | bm1 |
| .....gaucagcgcacggggcgagagaa.....                                                                               | 1  | 0 | bm1 |
| .....ggaucagcgcacggggcgagaU.....                                                                                | 1  | 1 | em3 |
| .....gaucagcgcacggggcgagagU.....                                                                                | 3  | 1 | em3 |
| .....gaucagcgcacggggcgagagaa.....                                                                               | 1  | 0 | mm3 |
| .....gucgccgugggaucagcgc.....                                                                                   | 2  | 0 | cx1 |
| .....gaucagcgcacggggcgagaga.....                                                                                | 1  | 0 | cx1 |
| .....gaucagcgcacggggcgagagU.....                                                                                | 3  | 1 | cx1 |
| .....cagcgcacggggcgagagU.....                                                                                   | 1  | 1 | cx1 |
| .....cacggggcgagagaagcuc.....                                                                                   | 1  | 0 | cx1 |
| .....ggaucagcgcacggggcgaga.....                                                                                 | 1  | 0 | 3T3 |
| .....gaugcaCcgccacggggcgagag.....                                                                               | 1  | 1 | 3T3 |
| .....gaucagcgcacggggcgagaa.....                                                                                 | 1  | 1 | 3T3 |
| .....gaucagcgcacggggcgagagU.....                                                                                | 17 | 1 | 3T3 |
| .....gaucagcgcacggggcgagaga.....                                                                                | 10 | 0 | 3T3 |
| .....gaucagcgcacggggcgag.....                                                                                   | 2  | 0 | mdc |
| .....gaucagcgcacggggcgagag.....                                                                                 | 3  | 0 | mdc |
| .....ugggaucagcgcacggggcgagU.....                                                                               | 1  | 1 | CFU |

Star

Mature

|                                                                                                                 |    |   |     |
|-----------------------------------------------------------------------------------------------------------------|----|---|-----|
| ggugcuggagcucggagcggaccocggucucccguagcccgggcgguugcuucccggagagucgcccggggaugcagcgcacgggcgagagaagcuccaaagcuucccaag |    |   |     |
| .....ggaugcagcgcacgggcgagU.....                                                                                 | 2  | 1 | CFU |
| .....ggaugcagcgcacgggcgaga.....                                                                                 | 1  | 0 | CFU |
| .....gaugcagcgcacgggcgag.....                                                                                   | 1  | 0 | CFU |
| .....gCugcagcgcacgggcgagag.....                                                                                 | 2  | 1 | CFU |
| .....gaugcagcgcacgggcgagag.....                                                                                 | 4  | 0 | CFU |
| .....gaugcagcgcacgggcgagaA.....                                                                                 | 2  | 1 | CFU |
| .....gaugcagcgcacgggcgagagU.....                                                                                | 7  | 1 | CFU |
| .....gaugcagcgcacgggcgCgaga.....                                                                                | 1  | 1 | CFU |
| .....gaugcagcgcacgggcgagaga.....                                                                                | 3  | 0 | CFU |
| .....gaugcagcgcacgggcgag.....                                                                                   | 3  | 0 | 48t |
| .....gCagcgcacgggcgagagaagcu.....                                                                               | 1  | 0 | 48t |
| .....gaugcagcgcacgggcgaga.....                                                                                  | 1  | 0 | mzb |
| .....gaugcagcgcacgggcgagag.....                                                                                 | 3  | 0 | mzb |
| .....gaugcagcgcacgggcgagaga.....                                                                                | 2  | 0 | mzb |
| .....gaugcagcgcacgggcgagag.....                                                                                 | 1  | 0 | SSC |
| .....gaugcagcgcacgggcgaga.....                                                                                  | 1  | 0 | hr1 |
| .....ugggaugcagcgcacgggcga.....                                                                                 | 1  | 0 | pcl |
| .....ugggaugcagcgcacgggcgag.....                                                                                | 1  | 0 | pcl |
| .....ggaugcagcgcacgggcgaga.....                                                                                 | 1  | 0 | pcl |
| .....gaugcagcgcacgggcgag.....                                                                                   | 6  | 0 | pcl |
| .....gaugcagcgcacgggcgag.....                                                                                   | 12 | 0 | gc2 |
| .....gaugcagcgcacgggcgaga.....                                                                                  | 7  | 0 | gc2 |
| .....gaugcagcgcacgggcgagag.....                                                                                 | 8  | 0 | gc2 |
| .....augcagcgcacgggcgaga.....                                                                                   | 1  | 0 | gc2 |
| .....gaugcagcgcacgggcgag.....                                                                                   | 1  | 0 | sp2 |
| .....gaugcagcgcacgggcgaga.....                                                                                  | 3  | 0 | sp2 |
| .....gaugcagcgcacgggcgagag.....                                                                                 | 6  | 0 | sp2 |
| .....gaugcagcgcacgggcgagaga.....                                                                                | 2  | 0 | sp2 |
| .....gaugcagcgcacgggcgag.....                                                                                   | 3  | 0 | skn |
| .....gaugcagcgcacgggcgaga.....                                                                                  | 1  | 0 | skn |
| .....gaugcagcgcacgggcgagag.....                                                                                 | 3  | 0 | skn |
| .....gaugcagcgcacgggcgagaga.....                                                                                | 1  | 0 | skn |
| .....gaugcagcgcacgggcgag.....                                                                                   | 4  | 0 | nt2 |
| .....gaugcagcgcacgggcgaga.....                                                                                  | 1  | 0 | nt2 |
| .....gaugcagcgcacgggcgagag.....                                                                                 | 2  | 0 | nt2 |
| .....ucggagcggaccocgggu.....                                                                                    | 1  | 0 | mE8 |
| .....guagcccgggcgguuc.....                                                                                      | 1  | 0 | mE8 |
| .....gcUgugggaugcagcgc.....                                                                                     | 1  | 1 | mE8 |
| .....ggaugcagcgcacgggcgaga.....                                                                                 | 2  | 0 | mE8 |
| .....gaugcagcgcacgggcgaga.....                                                                                  | 1  | 0 | mE8 |
| .....gaugcagcgcacgggcgagaU.....                                                                                 | 5  | 1 | mE8 |
| .....gaugcagcgcacgggcgagag.....                                                                                 | 2  | 0 | mE8 |
| .....gaugcagcgcacgggcgagaga.....                                                                                | 4  | 0 | mE8 |
| .....gaugcagcgcacgggcgagagC.....                                                                                | 1  | 1 | mE8 |
| .....gaugcagcgcacgggcgagagG.....                                                                                | 1  | 1 | mE8 |
| .....gaugcagcgcacgggcgagCga.....                                                                                | 1  | 1 | mE8 |
| .....gaugcagcgcacgggcgagagU.....                                                                                | 17 | 1 | mE8 |
| .....ggaugcagcgcacgggcgagaU.....                                                                                | 1  | 1 | h12 |
| .....gaugcagcgcacgggcgagaU.....                                                                                 | 4  | 1 | h12 |
| .....gaugcagcgcacgggcgagag.....                                                                                 | 1  | 1 | h12 |
| .....gaugcagcgcacgggcgagag.....                                                                                 | 1  | 1 | h12 |
| .....gaugcagcgcacgggcgagag.....                                                                                 | 4  | 0 | h12 |
| .....gaugcagcgcacgggcgagaga.....                                                                                | 2  | 0 | h12 |
| .....gaugcagcgcacgggcgagagU.....                                                                                | 8  | 1 | h12 |
| .....gaugcagcgcacgggcgagagaa.....                                                                               | 1  | 0 | h12 |
| .....gaugcagcgcacgggcgagagaaU.....                                                                              | 1  | 1 | h12 |
| .....gaugcagcgcacgggcgagagU.....                                                                                | 2  | 1 | je2 |

Star

Mature

|                                                                                              |    |   |     |
|----------------------------------------------------------------------------------------------|----|---|-----|
| ggugcuggagcucggagcggaccgccggucucccgagaccggggcgugcuucccgagagucgcccggggaugcagcgcacggggcgagagaU | 1  | 1 | je2 |
| .....gaugcagcgcacggggcgagagaU.....                                                           | 7  | 0 | c8t |
| .....gaugcagcgcacggggcgagaga.....                                                            | 3  | 0 | c8t |
| .....gaugcagcgcacggggcgagaga.....                                                            | 2  | 0 | c8t |
| .....gaugcagcgcacggggcgagaga.....                                                            | 1  | 0 | c8t |
| .....gaugcagcgcacggggcgagagaUa.....                                                          | 1  | 1 | ut1 |
| .....gaugcagcgcacggggcgagagaU.....                                                           | 3  | 1 | ut1 |
| .....gaugcagcgcacggggcgagaga.....                                                            | 3  | 0 | ut1 |
| .....gaugcagcgcacggggcgagagaa.....                                                           | 1  | 0 | ut1 |
| .....gaugcagcgcacggggcgagaga.....                                                            | 2  | 0 | nt1 |
| .....gaugcagcgcacggggcgagaga.....                                                            | 1  | 0 | nt1 |
| .....ggaugcagcgcacggggcgagaga.....                                                           | 1  | 0 | c4t |
| .....gaugcagcgcacggggcgagaga.....                                                            | 4  | 0 | c4t |
| .....gaugcagcgcacggggcgagaga.....                                                            | 4  | 0 | c4t |
| .....gaugcagcgcacggggcgagaga.....                                                            | 4  | 0 | c4t |
| .....gaugcagcgcacggggcgagagaa.....                                                           | 1  | 0 | c4t |
| .....ggaugcagcgcacggggcgagaga.....                                                           | 2  | 0 | pob |
| .....gaugcagcgcacggggcgagaga.....                                                            | 3  | 0 | pob |
| .....gaugcagcgcacggggcgagaga.....                                                            | 2  | 0 | pob |
| .....gaugcagcgcacggggcgagaga.....                                                            | 6  | 0 | pob |
| .....gaugcagcgcacggggcgagagaa.....                                                           | 2  | 0 | pob |
| .....gugggaugcagcgcacggggcgagaga.....                                                        | 1  | 0 | peb |
| .....ugggaugcagcgcacggggcgagaga.....                                                         | 1  | 0 | peb |
| .....gaugcagcgcacggggcgagaga.....                                                            | 1  | 0 | peb |
| .....gaugcagcgcacggggcgagaga.....                                                            | 9  | 0 | peb |
| .....gaugcagcgcacggggcgagaga.....                                                            | 11 | 0 | peb |
| .....gaugcagcgcacggggcgagaga.....                                                            | 4  | 0 | peb |
| .....gaugcagcgcacggggcgagagaa.....                                                           | 1  | 0 | peb |
| .....gaugcagcgcacggggcgagaga.....                                                            | 4  | 0 | mbm |
| .....gaugcagcgcacggggcgagaga.....                                                            | 7  | 0 | mbm |
| .....gaugcagcgcacggggcgagagaU.....                                                           | 1  | 1 | ool |
| .....gaugcagcgcacggggcgagaga.....                                                            | 1  | 0 | ool |
| .....gagagucgcccugggaug.....                                                                 | 1  | 0 | li1 |
| .....ugggaugcagcgcacggggcgagaga.....                                                         | 1  | 0 | li1 |
| .....gaugcagcgcacggggcgagaga.....                                                            | 1  | 0 | li1 |
| .....gaugcagcgcacggggcgagagaU.....                                                           | 6  | 1 | li1 |
| .....gaugcagcgcacggggcgagagaU.....                                                           | 2  | 1 | li1 |
| .....gagagucgcccugggaugc.....                                                                | 1  | 0 | th2 |
| .....gaugcagcgcacggggcgagaga.....                                                            | 27 | 0 | th2 |
| .....gaugcagcgcacggggcgagaga.....                                                            | 10 | 0 | th2 |
| .....gaugcagcgcacggggcgagaga.....                                                            | 6  | 0 | th2 |
| .....gaugcagcgcacggggcgagaga.....                                                            | 1  | 0 | th2 |
| .....gaugcagcgcacggggcgagaga.....                                                            | 4  | 0 | sg1 |
| .....gaugcagcgcacggggcgagaga.....                                                            | 1  | 0 | sg1 |
| .....gaugcagcgcacggggcgagaga.....                                                            | 7  | 0 | nt4 |
| .....gaugcagcgcacggggcgagaga.....                                                            | 2  | 0 | nt4 |
| .....ggaugcagcgcacggggcgagaga.....                                                           | 1  | 0 | th7 |
| .....ggaugcagcgcacggggcgagaga.....                                                           | 2  | 0 | th7 |
| .....gaugcagcgcacggggcgagaga.....                                                            | 11 | 0 | th7 |
| .....gaugcagcgcacggggcgagaga.....                                                            | 4  | 0 | th7 |
| .....gaugcagcgcacggggcgagaga.....                                                            | 1  | 0 | th7 |
| .....ugggaugcagcgcacggggcgagaga.....                                                         | 1  | 0 | nct |
| .....ugggaugcagcgcacggggcgagaga.....                                                         | 1  | 0 | nct |
| .....ggaugcagcgcacggggcgagaga.....                                                           | 1  | 0 | nct |
| .....gaugcagcgcacggggcgagaga.....                                                            | 6  | 0 | nct |
| .....gaugcagcgcacggggcgagaga.....                                                            | 1  | 0 | nct |



Star

Mature

|                                                                                                                                                   |   |   |     |
|---------------------------------------------------------------------------------------------------------------------------------------------------|---|---|-----|
| ggugcuggagcucggagcggaccgccgguccuccg <u>uagcccg</u> ggcggu <u>gcuuccc</u> gagagucg <u>ccg</u> ugggaugcagcgca <u>cg</u> ggcgagagaagcuccaaagcuuccaag |   |   |     |
| .....gaugcagcgca <u>cg</u> ggcgagag.....                                                                                                          | 1 | 0 | nct |
| .....gaugcagcgca <u>cg</u> ggcgagaga.....                                                                                                         | 1 | 0 | nct |
| .....ugcagcgca <u>cg</u> ggcgagag.....                                                                                                            | 1 | 0 | nct |
| ggugcuggagcucggagc.....                                                                                                                           | 1 | 0 | Aml |

miRBase precursor : mmu\_chr8\_40622  
Total read count : 649  
mmu\_chr8\_40622 read count 622  
mmu\_chr8\_40622\* read count 26  
remaining reads : 27

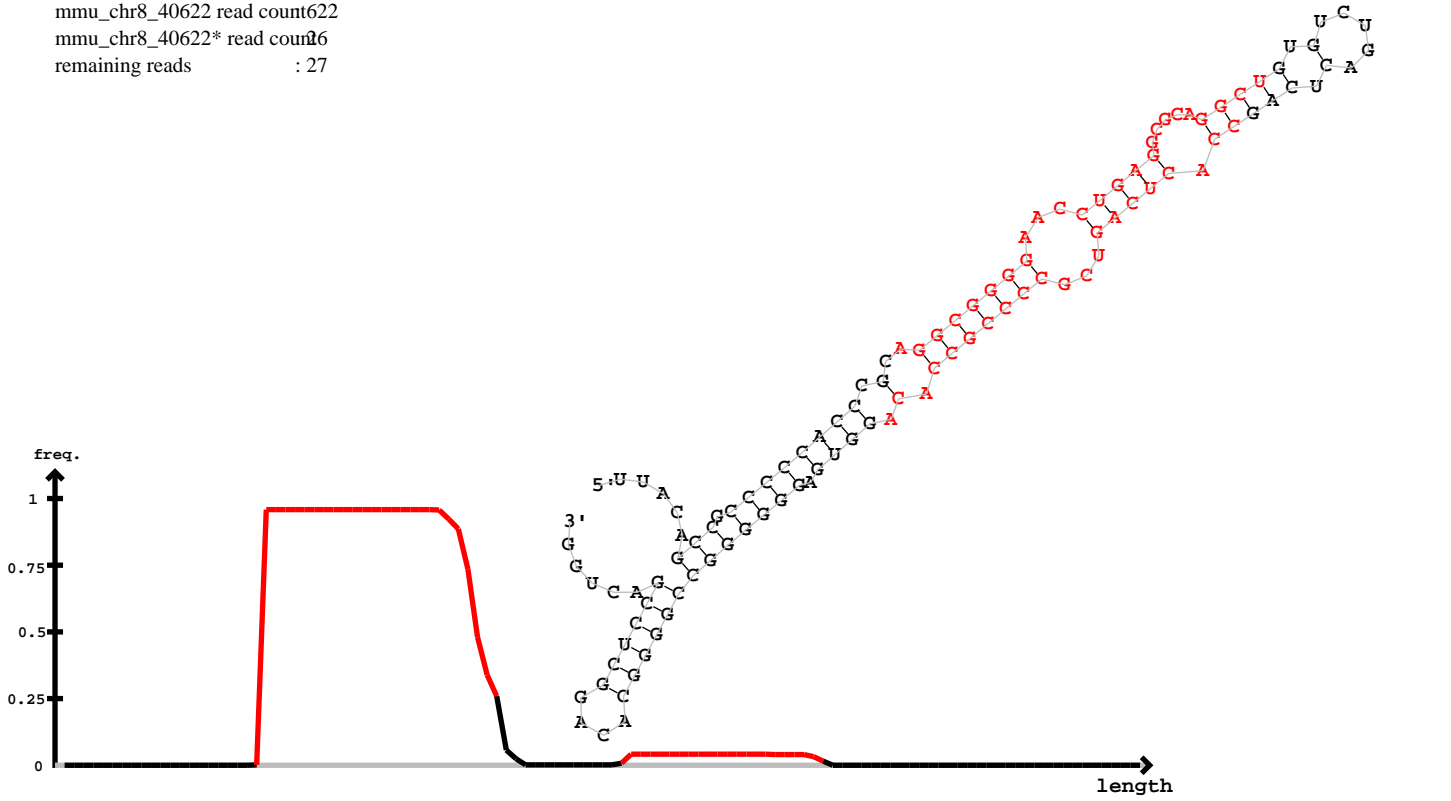

mmu\_chr8\_40622

mmu\_chr8\_40622\*

| 5' -                                                                                                                                 |  | -3' | exp | reads | mm | sample |
|--------------------------------------------------------------------------------------------------------------------------------------|--|-----|-----|-------|----|--------|
| uuaacagccgccccaccgcaggcggggaaccugaggcgcagcugugucugacucagccacucagucgccccgccacaaggugaggggggcggggcacaggcuccgacugg                       |  |     |     |       |    |        |
| .....(((.....(((.....(((.....(((.....(((.....(((.....(((.....(((.....(((.....(((.....(((.....(((.....(((.....(((.....(((.....))).... |  |     |     |       |    |        |
| .....aggcggggaaccugaggcgcag.....                                                                                                     |  |     |     | 1     | 0  | E15    |
| .....aggcggggaaccugaggcgcagg.....                                                                                                    |  |     |     | 1     | 0  | E15    |
| .....aggcggggaaccugaggcgcagA.....                                                                                                    |  |     |     | 1     | 1  | E15    |
|                                                                                                                                      |  |     |     |       |    |        |
| .....caggcggggaaccugaggcgcag.....                                                                                                    |  |     |     | 1     | 0  | nkc    |
| .....aggcggggaaccugaggcgc.....                                                                                                       |  |     |     | 2     | 0  | nkc    |
| .....aggcggggaaccugaggcgc.....                                                                                                       |  |     |     | 1     | 0  | nkc    |
| .....aggcggggaaccugaggcgcga.....                                                                                                     |  |     |     | 4     | 0  | nkc    |
| .....aggcggggaaccugaggcgcag.....                                                                                                     |  |     |     | 19    | 0  | nkc    |
| .....aggcggggaaccugaggcgcagg.....                                                                                                    |  |     |     | 15    | 0  | nkc    |
| .....aggcggggaaccugaggcgcaggc.....                                                                                                   |  |     |     | 9     | 0  | nkc    |
| .....aggcggggaaccugaggcgcaggcu.....                                                                                                  |  |     |     | 18    | 0  | nkc    |
| .....aggcggggaaccugaggcgcaggcug.....                                                                                                 |  |     |     | 4     | 0  | nkc    |
| .....aggcggggaaccugaggcgcaggcugu.....                                                                                                |  |     |     | 1     | 0  | nkc    |
|                                                                                                                                      |  |     |     |       |    |        |
| .....aggcggggaaccugaggcgcaggcugu.....                                                                                                |  |     |     | 3     | 0  | 3T3    |
|                                                                                                                                      |  |     |     |       |    |        |
| .....aggcggggaaccugaggcgcga.....                                                                                                     |  |     |     | 1     | 0  | mdc    |
| .....aggcggggaaccugaggcgcag.....                                                                                                     |  |     |     | 3     | 0  | mdc    |
| .....aggcggggaaccugaggcgcagg.....                                                                                                    |  |     |     | 2     | 0  | mdc    |
| .....aggcggggaaccugaggcgcaggcu.....                                                                                                  |  |     |     | 3     | 0  | mdc    |
| .....aggcggggaaccugaggcgcaggcug.....                                                                                                 |  |     |     | 2     | 0  | mdc    |
|                                                                                                                                      |  |     |     |       |    |        |
| .....aggcggggaaccugaggcgcagg.....                                                                                                    |  |     |     | 1     | 0  | CFU    |
| .....aggcggggaaccugaggcgcaggcu.....                                                                                                  |  |     |     | 1     | 0  | CFU    |
| .....agCggggaaccugaggcgcaggcu.....                                                                                                   |  |     |     | 1     | 1  | CFU    |
| .....ccacucagucgccccgccacU.....                                                                                                      |  |     |     | 2     | 1  | CFU    |
|                                                                                                                                      |  |     |     |       |    |        |
| .....aggcggggaaccugaggcgc.....                                                                                                       |  |     |     | 1     | 0  | 48t    |
| .....aggcggggaaccugaggcgc.....                                                                                                       |  |     |     | 3     | 0  | 48t    |
| .....aggcggggaaccugaggcgcga.....                                                                                                     |  |     |     | 5     | 0  | 48t    |
| .....aggcggggaaccugaggcgcag.....                                                                                                     |  |     |     | 10    | 0  | 48t    |
| .....aggcggggaaccugaggcgcagg.....                                                                                                    |  |     |     | 1     | 0  | 48t    |
| .....aggcggggaaccugaggcgcaggc.....                                                                                                   |  |     |     | 1     | 0  | 48t    |

uuacagccgccccaccgcaggcggggaaccugagggcgaggcugugucugacucagccaacucagucgccccgccacaggugaggggggccccgggacaggcuccgacugg

|                                        |    |   |     |
|----------------------------------------|----|---|-----|
| .....aggcggggaaccugagggcgaggcu.....    | 5  | 0 | 48t |
| .....aggcggggaaccugagggcgaggcugu.....  | 1  | 0 | 48t |
| .....ccacucagucgccccgccca.....         | 1  | 0 | 48t |
| .....ccacucagucgccccgccac.....         | 1  | 0 | 48t |
| .....aggcggggaaccugagggcgaggc.....     | 1  | 0 | SSC |
| .....aggcggggaaccugagggcgagg.....      | 1  | 0 | mzb |
| .....aggcggggaaccugagggcgaggcu.....    | 1  | 0 | mzb |
| .....aggcggggaaccugagggcgaggcu.....    | 3  | 0 | t11 |
| .....ccacucagucgccccgccacU.....        | 2  | 1 | t11 |
| .....ccacucagucgccccgccaca.....        | 1  | 0 | t11 |
| .....aggcggggaaccugagggcg.....         | 1  | 0 | gcb |
| .....aggcggggaaccugagggcgag.....       | 8  | 0 | gcb |
| .....aggcggggaaccugagggcgagg.....      | 8  | 0 | gcb |
| .....aggcggggaaccugagggcgaggc.....     | 5  | 0 | gcb |
| .....aggcggggaaccugagggcgaggcu.....    | 14 | 0 | gcb |
| .....aggcggggaaccugagggcgaggcug.....   | 1  | 0 | gcb |
| .....aggcggggaaccugagggcgaggcugu.....  | 1  | 0 | gcb |
| .....aggcggggaaccugagggcgaggcugug..... | 1  | 0 | gcb |
| .....ccacucagucgccccgccca.....         | 1  | 0 | gcb |
| .....ccacucagucgccccgccac.....         | 1  | 0 | gcb |
| .....aggcggggaaccugagggcgaggc.....     | 1  | 0 | ut2 |
| .....aggcggggaaccugagggcgaggA.....     | 1  | 1 | ut2 |
| .....aggcggggaaccugagggcgaggcu.....    | 1  | 0 | ut2 |
| .....aggcggggaaccugagggcgca.....       | 2  | 0 | gc2 |
| .....aggcggggaaccugagggcgag.....       | 2  | 0 | gc2 |
| .....aggcggggaaccugagggcgagg.....      | 1  | 0 | gc2 |
| .....aggcggggaaccugagggcgaggc.....     | 3  | 0 | gc2 |
| .....aggcggggaaccugagggcgaggcu.....    | 5  | 0 | gc2 |
| .....aggcggggaaccugagggcgaggcug.....   | 1  | 0 | gc2 |
| .....gccacucagucgccccgccac.....        | 1  | 0 | gc2 |
| .....ccacucagucgccccgccac.....         | 1  | 0 | gc2 |
| .....aggcggggaaccugagggcg.....         | 1  | 0 | pe1 |
| .....aggcggggaaccugagggcg.....         | 1  | 0 | pe1 |
| .....aggcggggaaccugagggcgca.....       | 1  | 0 | pe1 |
| .....aggcggggaaccugagggcgag.....       | 4  | 0 | pe1 |
| .....aggcggggaaccugagggcgagg.....      | 2  | 0 | pe1 |
| .....aggcggggaaccugagggcgaggc.....     | 1  | 0 | pe1 |
| .....aggcggggaaccugagggcgaggcu.....    | 2  | 0 | pe1 |
| .....aggcggggaaccugagggcgaggcu.....    | 1  | 0 | h11 |
| .....aggcggggaaccugagggcgca.....       | 1  | 0 | h1c |
| .....aggcggggaaccugagggcgag.....       | 1  | 0 | h1c |
| .....aggcggggaaccugagggcgagg.....      | 1  | 0 | h1c |
| .....aggcggggaaccugagggcgagU.....      | 1  | 1 | h1c |
| .....aggcggggaaccugagggcg.....         | 1  | 0 | sp2 |
| .....aggcggggaaccugagggcg.....         | 1  | 0 | sp2 |
| .....aggcggggaaccugagggcgca.....       | 2  | 0 | sp2 |
| .....aggcggggaaccugagggcgag.....       | 3  | 0 | sp2 |
| .....aggcggggaaccugagggcgagg.....      | 2  | 0 | sp2 |
| .....aggcggggaaccugagggcgaggc.....     | 1  | 0 | sp2 |
| .....aggcggggaaccugagggcgaggcu.....    | 4  | 0 | sp2 |
| .....aggcggggaaccugagggcgaggcug.....   | 1  | 0 | sp2 |
| .....aggcggggaaccugagggcg.....         | 1  | 0 | mus |
| .....aggcggggaaccugagggcgag.....       | 1  | 0 | mus |
| .....aggcggggaaccugagggcgaggc.....     | 1  | 0 | mus |
| .....aggcggggaaccugagggcgca.....       | 2  | 0 | nt2 |
| .....aggcggggaaccugagggcgca.....       | 1  | 0 | skn |

uuacagcgcgccccaccgcaggcggggaaccugagggcgagggcugugucugacucagccaacucagucgccccgccacaggugaggggggccccgggacagggcuccgacugg

|                                       |    |   |     |
|---------------------------------------|----|---|-----|
| .....aggcggggaaccugagggcgag.....      | 1  | 0 | skn |
| .....aggcggggaaccugagggcgagg.....     | 1  | 0 | skn |
| .....aggcggggaaccugagggcgc.....       | 1  | 0 | itr |
| .....aggcggggaaccugagggcgca.....      | 6  | 0 | itr |
| .....aggcggggaaccugagggcgag.....      | 6  | 0 | itr |
| .....aggcggggaaccugagggcgaggc.....    | 1  | 0 | itr |
| .....aggcggggaaccugagggcg.....        | 1  | 0 | bm2 |
| .....aggcggggaaccugagggcgca.....      | 2  | 0 | bm2 |
| .....aggcggggaaccugagggcgag.....      | 3  | 0 | bm2 |
| .....aggcggggaaccugagggcgaggc.....    | 2  | 0 | bm2 |
| .....aggcggggaaccugagggcgaggc.....    | 1  | 0 | bm2 |
| .....aggcggggaaccugagggcgaggcu.....   | 1  | 0 | bm2 |
| .....aggcggggaaccugagggcgag.....      | 1  | 0 | h12 |
| .....aggcggggaaccugagggcgaggU.....    | 1  | 1 | h12 |
| .....aggcggggaaccugagggcgaggcu.....   | 1  | 0 | h12 |
| .....aggcggggaaccugagggcgaggcu.....   | 1  | 0 | ut1 |
| .....aggcggggaaccugagggcgca.....      | 4  | 0 | c8t |
| .....aggcggggaaccugagggcgag.....      | 2  | 0 | c8t |
| .....aggcggggaaccugagggcgaggc.....    | 1  | 0 | c8t |
| .....aggcggggaaccugagggcgaggcu.....   | 2  | 0 | c8t |
| .....aggcggggaaccugagggcgaggcugu..... | 1  | 0 | c8t |
| .....gccacucagucgccccgccaca.....      | 1  | 0 | c8t |
| .....aggcggggaaccugagggcgaggcu.....   | 1  | 0 | hi2 |
| .....ccacucagucgccccgccacU.....       | 2  | 1 | hi2 |
| .....aggcggggaaccugagggc.....         | 1  | 0 | Tm2 |
| .....aggcggggaaccugagggcgCggcu.....   | 1  | 1 | Tm2 |
| .....aggcggggaaccugagggcg.....        | 2  | 0 | ntr |
| .....aggcggggaaccugagggcgca.....      | 9  | 0 | ntr |
| .....aggcggggaaccugagggcgag.....      | 6  | 0 | ntr |
| .....ccacucagucgccccgccca.....        | 1  | 0 | ntr |
| .....ccacucagucgccccgccac.....        | 1  | 0 | ntr |
| .....aggcggggaaccugagggcg.....        | 1  | 0 | nt1 |
| .....aggcggggaaccugagggcgc.....       | 1  | 0 | c4t |
| .....aggcggggaaccugagggcgca.....      | 1  | 0 | c4t |
| .....aggcggggaaccugagggcgag.....      | 4  | 0 | c4t |
| .....aggcggggaaccugagggcgagg.....     | 5  | 0 | c4t |
| .....aggcggggaaccugagggcgaggcu.....   | 3  | 0 | c4t |
| .....ccacucagucgccccgccac.....        | 1  | 0 | c4t |
| .....aggcggggaaccugagggcgcaU.....     | 1  | 1 | ay2 |
| .....aggcggggaaccugagggcgaggcugu..... | 2  | 0 | Tp2 |
| .....ucugacucagccaacucagucgcccc.....  | 1  | 0 | Tp2 |
| .....aggcggggaaccugagggcg.....        | 1  | 0 | pob |
| .....aggcggggaaccugagggcgc.....       | 2  | 0 | pob |
| .....aggcggggaaccugagggcgca.....      | 7  | 0 | pob |
| .....aggcggggaaccugagggcgag.....      | 14 | 0 | pob |
| .....aggcggggaaccugagggcgagg.....     | 9  | 0 | pob |
| .....aggcggggaaccugagggcgaggc.....    | 3  | 0 | pob |
| .....aggcggggaaccugagggcgaggcu.....   | 13 | 0 | pob |
| .....aggcggggaaccugagggcgaggcug.....  | 5  | 0 | pob |
| .....aggcggggaaccugagggcgc.....       | 2  | 0 | peb |
| .....aggcggggaaccugagggcgca.....      | 8  | 0 | peb |
| .....aggcggggaaccugagggcgag.....      | 10 | 0 | peb |
| .....aggcggggaaccugagggcgagg.....     | 3  | 0 | peb |
| .....aggcggggaaccugagggcgaggc.....    | 4  | 0 | peb |
| .....aggcggggaaccugagggcgaggcu.....   | 5  | 0 | peb |

uuacagcgcgccccaccgagggcggggaaccugagggcgagggcugugucugacucagccaacucagucgccccgccacaggugaggggggccccgggacagggcuccgacugg

|                                        |    |   |     |
|----------------------------------------|----|---|-----|
| .....gccacucagucgccccgccac.....        | 2  | 0 | peb |
| .....ccacucagucgccccgccac.....         | 1  | 0 | peb |
| .....aggcggggaaccugagggcgcaA.....      | 1  | 1 | Tp1 |
| .....aggcggggaaccugagggcgagA.....      | 1  | 1 | Tp1 |
| .....aggcggggaaccugagggcgagggcu.....   | 3  | 0 | Tp1 |
| .....aggcggggaaccugagggcgagggcuAu..... | 1  | 1 | Tp1 |
| .....aggcggggaaccugagggcgagggcugu..... | 1  | 0 | Tp1 |
| .....aggcggggaaccugagggcg.....         | 1  | 0 | bac |
| .....aggcggggaaccugagggcgca.....       | 1  | 0 | bac |
| .....aggcggggaaccugagggcgag.....       | 2  | 0 | bac |
| .....aggcggggaaccugagggcgaggg.....     | 1  | 0 | bac |
| .....aggcggggaaccugagggcgagggc.....    | 1  | 0 | bac |
| .....aggcggggaaccugagggcgag.....       | 1  | 0 | mbm |
| .....aggcggggaaccugagggcgaggg.....     | 1  | 0 | mbm |
| .....aggcggggaaccugagggcgagA.....      | 1  | 1 | 3Ta |
| .....aggcggggaaccugagggcg.....         | 2  | 0 | sp1 |
| .....aggcggggaaccugagggcgca.....       | 1  | 0 | sp1 |
| .....aggcggggaaccugagggcgag.....       | 2  | 0 | sp1 |
| .....aggcggggaaccugagggcgaggg.....     | 7  | 0 | sp1 |
| .....aggcggggaaccugagggcgagggc.....    | 1  | 0 | sp1 |
| .....aggcggggaaccugagggcgagggcu.....   | 12 | 0 | sp1 |
| .....aggcggggaaccugagggcgagggcugu..... | 2  | 0 | sp1 |
| .....aggcggggaaccugagggcgag.....       | 1  | 0 | li2 |
| .....aggcggggaaccugagggcgagggcu.....   | 2  | 0 | li2 |
| .....ccacucagucgccccgccA.....          | 1  | 1 | li2 |
| .....ccacucagucgccccgccU.....          | 1  | 1 | li2 |
| .....aggcggggaaccugagggcg.....         | 1  | 0 | li1 |
| .....aggcggggaaccugagggcgca.....       | 3  | 0 | li1 |
| .....aggcggggaaccugagggcgagggcugu..... | 1  | 0 | li1 |
| .....aggcggggaaccugagggcg.....         | 1  | 0 | imb |
| .....aggcggggaaccugagggcg.....         | 1  | 0 | imb |
| .....aggcggggaaccugagggcgca.....       | 3  | 0 | imb |
| .....aggcggggaaccugagggcgag.....       | 7  | 0 | imb |
| .....aggcggggaaccugagggcgaggg.....     | 2  | 0 | imb |
| .....ccacucagucgccccgccA.....          | 1  | 0 | imb |
| .....aggcggggaaccugagggcgca.....       | 1  | 0 | bm1 |
| .....aggcggggaaccugagggcgag.....       | 6  | 0 | bm1 |
| .....aggcggggaaccugagggcgaggg.....     | 5  | 0 | bm1 |
| .....aggcggggaaccugagggcgagggc.....    | 2  | 0 | bm1 |
| .....aggcggggaaccugagggcgagggcu.....   | 1  | 0 | bm1 |
| .....aggcggggaaccugagggcgagggcugu..... | 1  | 0 | bm1 |
| .....aggcggggaaccugagggcgagggcugu..... | 2  | 0 | bm1 |
| .....aggcggggaaccugagggcg.....         | 4  | 0 | th2 |
| .....aggcggggaaccugagggcg.....         | 5  | 0 | th2 |
| .....aggcggggaaccugagggcgca.....       | 22 | 0 | th2 |
| .....aggcggggaaccugagggcgag.....       | 33 | 0 | th2 |
| .....aggcggggaaccugagggcgaggg.....     | 9  | 0 | th2 |
| .....aggcggggaaccugagggcgagggc.....    | 7  | 0 | th2 |
| .....aggcggggaaccugagggcgagggcu.....   | 23 | 0 | th2 |
| .....aggcggggaaccugagggcgagggcugu..... | 3  | 0 | th2 |
| .....ccacucagucgccccgccA.....          | 1  | 0 | th2 |
| .....aggcggggaaccugagggcgca.....       | 2  | 0 | sg1 |
| .....aggcggggaaccugagggcgag.....       | 2  | 0 | sg1 |
| .....aggcggggaaccugagggcgagggc.....    | 3  | 0 | sg1 |
| .....aggcggggaaccugagggcgaggg.....     | 2  | 0 | nt4 |
| .....aggcggggaaccugagggcgagggcu.....   | 2  | 0 | nt4 |
| .....aggcggggaaccugagggcgag.....       | 1  | 0 | Tm1 |

uuacagcgcgccccaccgcaggcggggaaccugaggcgcaggcugugucugacucagccaacucagucgccccgccacaaggugaggggggccccgggacaggcuccgacugg

|                                       |   |   |     |
|---------------------------------------|---|---|-----|
| .....aggcggggaaccugaggcg.....         | 2 | 0 | th7 |
| .....aggcggggaaccugaggcgc.....        | 1 | 0 | th7 |
| .....aggcggggaaccugaggcgca.....       | 2 | 0 | th7 |
| .....aggcggggaaccugaggcgcag.....      | 7 | 0 | th7 |
| .....aggcggggaaccugaggcgcagg.....     | 4 | 0 | th7 |
| .....aggcggggaaccugaggcgcaggc.....    | 3 | 0 | th7 |
| .....aggcggggaaccugaggcgcaggcu.....   | 1 | 0 | th7 |
| .....ccacucagucgccccgccac.....        | 1 | 0 | th7 |
| .....ccacucagucgccccgccacU.....       | 1 | 1 | cx1 |
| .....aggcggggaaccugaggcg.....         | 3 | 0 | nct |
| .....aggcggggaaccugaggcgca.....       | 7 | 0 | nct |
| .....aggcggggaaccugaggcgcag.....      | 1 | 0 | nct |
| .....aggcggggaaccugaggcgcagg.....     | 2 | 0 | nct |
| .....aggcggggaaccugaggcgcaggcug.....  | 1 | 0 | nct |
| .....aggcggggaaccugaggcgcaggcugu..... | 1 | 0 | nct |
| .....aggcggggaaccugaggcgc.....        | 1 | 0 | Am1 |



Mature

Star

gaacaggugcaaaaauuaaauccucuugcaaccagaacauugcucaguuagaguuuugauauaacaagaaggaauauaagcacaagguguuauugaaucauu

|                                                                 |   |   |     |
|-----------------------------------------------------------------|---|---|-----|
| ..... <u>auccucuugcaaccagaa</u> .....                           | 1 | 0 | 48t |
| ..... <u>auauacaagaaggaauaagcacaG</u> .....                     | 1 | 1 | mE8 |
| ..... <u>auccucuugcaaccagaa</u> ca.....                         | 1 | 0 | gc8 |
| ..... <u>auccucuugcaaccagaa</u> cu.....                         | 2 | 0 | t11 |
| ..... <u>auugcucaguuaga</u> guuuugauauaaca <u>Cgaagga</u> ..... | 1 | 1 | t11 |
| ..... <u>auccucuugcaaccagaa</u> .....                           | 4 | 0 | c4t |
| ..... <u>auccucuugcaaccagaa</u> c.....                          | 2 | 0 | c4t |
| ..... <u>auccucuugcaaccagaa</u> cu.....                         | 1 | 0 | pob |
| ..... <u>auccucuugcaaccagaa</u> ca.....                         | 1 | 0 | pob |
| ..... <u>cuugcaaccagaa</u> cu.....                              | 1 | 0 | pob |
| ..... <u>auccucuugcaaccagaa</u> .....                           | 7 | 0 | gc2 |
| ..... <u>auccucuugcaaccagaa</u> c.....                          | 1 | 0 | gc2 |
| ..... <u>auccucuugcaaccagaa</u> cu.....                         | 1 | 0 | gc2 |
| ..... <u>auccucuugcaaccagaa</u> .....                           | 4 | 0 | pc1 |
| ..... <u>auccucuugcaaccagaa</u> c.....                          | 1 | 0 | pc1 |
| ..... <u>auccucuugcaaccagaa</u> cu.....                         | 1 | 0 | mE1 |
| ..... <u>guuuugauauaacaagaagga</u> au.....                      | 1 | 0 | mE1 |
| ..... <u>auccucuugcaaccagaa</u> cu.....                         | 1 | 0 | bac |
| ..... <u>auccucuugcaaccagaa</u> .....                           | 1 | 0 | mus |
| ..... <u>aGugcucaguuaga</u> uu.....                             | 1 | 1 | Am2 |
| ..... <u>auccucuugcaaccagaa</u> ca.....                         | 1 | 0 | li2 |
| ..... <u>guuuugauauaacaagaa</u> Ugaaau.....                     | 2 | 1 | li2 |
| ..... <u>auccucuugcaaccagaa</u> .....                           | 2 | 0 | nt2 |
| ..... <u>auccucuugcaaccagaa</u> .....                           | 2 | 0 | itr |
| ..... <u>auccucuugcaaccagaa</u> .....                           | 8 | 0 | th2 |
| ..... <u>auccucuugcaaccagaa</u> c.....                          | 1 | 0 | th2 |
| ..... <u>auccucuugcaaccagaa</u> .....                           | 1 | 0 | mE8 |
| ..... <u>auccucuugcaaccagaa</u> cu.....                         | 1 | 0 | mE8 |
| ..... <u>auccucuugcaaccagaa</u> ca.....                         | 2 | 0 | mE8 |
| ..... <u>auccucuugcaaccagaa</u> c.....                          | 1 | 1 | mE8 |
| ..... <u>aguuugauauaacaagaagga</u> au.....                      | 1 | 0 | mE8 |
| ..... <u>auccucuugcaaccagaa</u> cu.....                         | 1 | 0 | h12 |
| ..... <u>auccucuugcaaccagaa</u> c.....                          | 1 | 0 | Tm1 |
| ..... <u>auccucuugcaaccagaa</u> .....                           | 1 | 0 | c8t |







miRBase precursor : mmu\_chrX\_38038  
 Total read count : 79  
 mmu\_chrX\_38038 read count 66  
 mmu\_chrX\_38038\* read count 13  
 remaining reads : 9

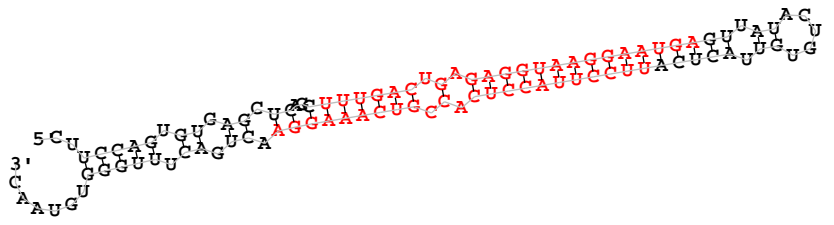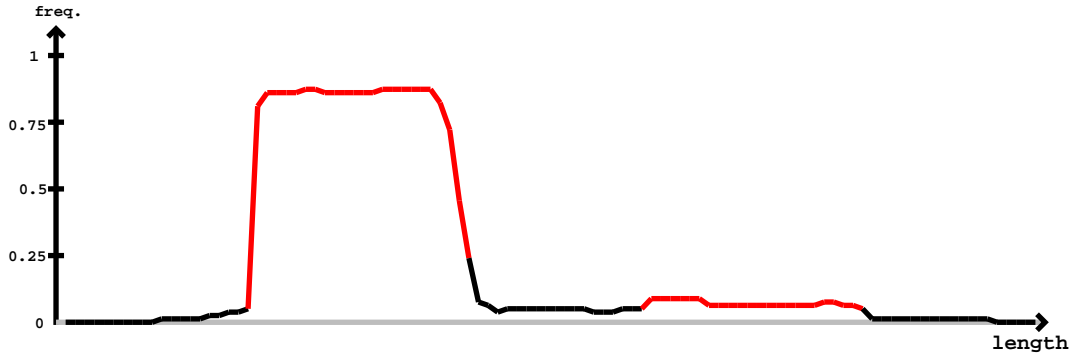

mmu\_chrX\_38038

mmu\_chrX\_38038\*

| 5'                               | mmu_chrX_38038        | mmu_chrX_38038*       | -3' | exp | reads | mm | sample |
|----------------------------------|-----------------------|-----------------------|-----|-----|-------|----|--------|
| ..((((((.....)))))).....         | uuugacugagagguaaggaau | uuugacugagagguaaggaau |     |     | 1     | 0  | mdc    |
| .....cugagagguaaggaugagG.....    |                       |                       |     |     | 1     | 1  | mdc    |
| .....uuugacugagagguaaggaau       |                       |                       |     |     | 1     | 0  | 48t    |
| .....uuugacugagagguaaggaauU..... |                       |                       |     |     | 1     | 1  | SSC    |
| .....uuugacugagagguaaggaau       |                       |                       |     |     | 1     | 0  | SSC    |
| .....uuugacugagagguaaggaau       |                       |                       |     |     | 2     | 0  | lun    |
| .....uuugacugagagguaaggaau       |                       |                       |     |     | 1     | 0  | ut2    |
| .....uuugacugagagguaaggaau       |                       |                       |     |     | 1     | 0  | je1    |
| .....uuugacugagagguaaggaau       |                       |                       |     |     | 2     | 0  | gc2    |
| .....uuugacugagagguaaggaau       |                       |                       |     |     | 1     | 0  | pcl    |
| .....uuugacugagagguaaggaau       |                       |                       |     |     | 1     | 0  | pcl    |
| .....auacuguguaucucuu            |                       |                       |     |     | 2     | 0  | pcl    |
| .....uuugacugagagguaaggaau       |                       |                       |     |     | 1     | 0  | skn    |
| .....uuugacugagagguaaggaau       |                       |                       |     |     | 1     | 0  | skn    |
| .....uuugacugagagguaaggaau       |                       |                       |     |     | 1     | 0  | nt2    |
| .....uuugacugagagguaaggaau       |                       |                       |     |     | 1     | 0  | nt2    |
| .....uuugacugagagguaaggaau       |                       |                       |     |     | 2     | 0  | nt2    |
| .....uuugacugagagguaaggaau       |                       |                       |     |     | 3     | 0  | nt2    |
| .....uuugacugagagguaaggaau       |                       |                       |     |     | 2     | 0  | nt2    |
| .....uuugacugagagguaaggaau       |                       |                       |     |     | 1     | 0  | itr    |
| .....uuugacugagagguaaggaau       |                       |                       |     |     | 1     | 0  | itr    |
| .....uuugacugagagguaaggaau       |                       |                       |     |     | 1     | 0  | itr    |
| .....uauucuuaccucaccguaaa        |                       |                       |     |     | 1     | 0  | em2    |

cuuccagugagagcucagcuuugacugagagguuaggaugaguuauacuguguuacucauuccuuaccucaccgucaaaggaacugacuuuuggguguaac

|                                          |   |   |     |
|------------------------------------------|---|---|-----|
| .....uuugacugagagguuaggaau.....          | 1 | 0 | h12 |
| .....uuugacugagagguuaggaau.....          | 1 | 0 | je2 |
| .....uuugacugagagguuaggaau.....          | 1 | 0 | c8t |
| .....uuugacugagagguuaggaauga.....        | 2 | 0 | c8t |
| .....uuugacugagagguuaggaau.....          | 2 | 0 | ut1 |
| .....uuCgacugagagguuaggaau.....          | 1 | 1 | ut1 |
| .....uuugacugagagguuaggaauU.....         | 1 | 1 | ut1 |
| .....uuugacugagagguuaggaau.....          | 1 | 0 | ut1 |
| .....uuccuuaccucaccgucaaagga.....        | 1 | 0 | br2 |
| .....uuugacugagagguuaggaauU.....         | 1 | 1 | Tm2 |
| .....uaaggaugaguuauacugugu.....          | 1 | 0 | Tm2 |
| .....uuugacugagagguuaggaau.....          | 1 | 0 | pan |
| .....uuccuuaccucaccgucaaagg.....         | 1 | 0 | mm2 |
| .....uuccuuaccucaccgucaaagga.....        | 1 | 0 | mm2 |
| .....uuugacugagagguuagga.....            | 1 | 0 | c4t |
| .....uuugacugagagguuaggaauga.....        | 1 | 0 | c4t |
| .....uuccuuaccucaccgucaaagga.....        | 1 | 0 | c4t |
| .....uuugacugagagguuaggaauga.....        | 1 | 0 | tp2 |
| .....uuugacugagagguuaggaauU.....         | 1 | 1 | tp2 |
| .....uuugacugagagguuaggaauuguu.....      | 1 | 0 | tp1 |
| .....uuugacugagagguuagga.....            | 1 | 0 | bac |
| .....uuugacugagagguuagga.....            | 1 | 0 | bac |
| .....uuugacugagagguuaggaau.....          | 1 | 0 | bac |
| .....uuugacugagagguuaggaau.....          | 1 | 0 | 3Ta |
| .....uuugacugagagguuaggaau.....          | 2 | 0 | sp1 |
| .....agcuuuugacugagagguuaggaauugagu..... | 1 | 0 | li1 |
| .....uuugacugagagguuagga.....            | 1 | 0 | bm1 |
| .....uuugacugagagguuaggaau.....          | 1 | 0 | bm1 |
| .....uuugacugagagguuagga.....            | 1 | 0 | th2 |
| .....uuugacugagagguuaggaau.....          | 1 | 0 | th2 |
| .....uuugacugagagguuaggaau.....          | 3 | 0 | th2 |
| .....uuugacugagagguuaggaauga.....        | 1 | 0 | th2 |
| .....uuugacugagagguuaggaau.....          | 3 | 0 | nt4 |
| .....uuugacugagagguuaggaauga.....        | 1 | 0 | nt4 |
| .....ucagcuuuugacugagagguuaggaau.....    | 1 | 0 | Tm1 |
| .....aguuuauacuguguuacuca.....           | 1 | 0 | em3 |
| .....uuugacugagagguuagga.....            | 1 | 0 | th7 |
| .....uuugacugagagguuaggaau.....          | 2 | 0 | th7 |
| .....uuugacugagagguuaggaau.....          | 1 | 0 | nct |
| .....ugagcucaA <u>cuuugacu</u> .....     | 1 | 1 | Am1 |
| .....Gaggaa <u>cugacu</u> uuugggu.....   | 1 | 1 | Am1 |



Mature

Star

|                                                                                                              |   |   |     |
|--------------------------------------------------------------------------------------------------------------|---|---|-----|
| ugucaaaaaaucaagcgauacaagagaaucagucagucgugaagaaugucucacugguugcucucuuucacaagaaugagucuaaaagcuaauuucuaucuaucuuug |   |   |     |
| .....uacaagagaacugaucagugcugaag.....                                                                         | 1 | 0 | gcb |
| .....uacaagagaacugaucagugcugaagu.....                                                                        | 1 | 0 | gcb |
| .....acaagagaacugaucagugcug.....                                                                             | 2 | 0 | gcb |
| .....acaagagaacugaucagugcuga.....                                                                            | 2 | 0 | gcb |
| .....uacaagagaacugaucagugcug.....                                                                            | 1 | 0 | ut2 |
| .....acaagagaacugaucagugcuga.....                                                                            | 1 | 0 | ut2 |
| .....uacaagagaacugaucagGgcug.....                                                                            | 1 | 1 | je1 |
| .....acaagagaacugaucagugcug.....                                                                             | 1 | 0 | je1 |
| .....uacaagagaacugaucagugcu.....                                                                             | 1 | 0 | pc1 |
| .....uacaagagaacugaucagugcuga.....                                                                           | 1 | 0 | pc1 |
| .....acaagagaacugaucagugcu.....                                                                              | 2 | 0 | pc1 |
| .....aaucagaagagaacugaucagugcu.....                                                                          | 1 | 0 | gc2 |
| .....uacaagagaacugaucagugc.....                                                                              | 2 | 0 | gc2 |
| .....uacaagagaacugaucagugcu.....                                                                             | 4 | 0 | gc2 |
| .....acaagagaacugaucagugcu.....                                                                              | 4 | 0 | gc2 |
| .....acaagagaacugaucagugcug.....                                                                             | 1 | 0 | gc2 |
| .....uacaagagaacugaucagugcug.....                                                                            | 1 | 0 | sp2 |
| .....uacaagagaacugaucagugcuga.....                                                                           | 2 | 0 | sp2 |
| .....acaagagaacugaucagugcug.....                                                                             | 3 | 0 | sp2 |
| .....acaagagaacugaucagugcuga.....                                                                            | 3 | 0 | sp2 |
| .....acaagagaacugaucagugcugaa.....                                                                           | 1 | 0 | sp2 |
| .....uacaagagaacugaucagugc.....                                                                              | 1 | 0 | mus |
| .....uacaagagaacugaucagugcu.....                                                                             | 1 | 0 | mus |
| .....acaagagaacugaucagugcug.....                                                                             | 1 | 0 | mus |
| .....uacaagagaacugaucagugc.....                                                                              | 1 | 0 | nt2 |
| .....uacaagagaacugaucagugcu.....                                                                             | 8 | 0 | nt2 |
| .....uacaagagaacugaucagugcug.....                                                                            | 2 | 0 | nt2 |
| .....uacaagagaacugaucagugcuga.....                                                                           | 2 | 0 | nt2 |
| .....acaagagaacugaucagugc.....                                                                               | 2 | 0 | nt2 |
| .....acaagagaacugaucagugcu.....                                                                              | 5 | 0 | nt2 |
| .....acaagagaacugaucagugcuga.....                                                                            | 1 | 0 | nt2 |
| .....caagagaacugaucagugcuga.....                                                                             | 1 | 0 | nt2 |
| .....uacugguugcucucuuucaca.....                                                                              | 1 | 0 | nt2 |
| .....caagagaacugaucagugcuga.....                                                                             | 1 | 0 | bm2 |
| .....uacugguugcucucuuucac.....                                                                               | 1 | 0 | bm2 |
| .....uacaagagaacugaucagugcug.....                                                                            | 2 | 0 | mE8 |
| .....uacaagagaacugaucagugcugaU.....                                                                          | 1 | 1 | je2 |
| .....uacaagagaacugaucagugc.....                                                                              | 2 | 0 | c8t |
| .....uacaagagaacugaucagugcu.....                                                                             | 2 | 0 | c8t |
| .....acaagagaacugaucagugcu.....                                                                              | 1 | 0 | c8t |
| .....acaagagaacugaucagugcuga.....                                                                            | 1 | 0 | c8t |
| .....gaacugaucagugcugaagu.....                                                                               | 1 | 0 | hi2 |
| .....uacaagagaacugaucagugcuga.....                                                                           | 3 | 0 | Tm2 |
| .....uacaagagaacugaucagugcugU.....                                                                           | 2 | 1 | Tm2 |
| .....uacaagagaacugaucagugcugaagu.....                                                                        | 1 | 0 | Tm2 |
| .....acaagagaacugaucagugcuga.....                                                                            | 1 | 0 | Tm2 |
| .....uacaagagaacugaucagugcu.....                                                                             | 1 | 0 | ntr |
| .....acaagagaacugaucagugcu.....                                                                              | 3 | 0 | ntr |
| .....uacaagagaacugaucagugcu.....                                                                             | 1 | 0 | ay2 |
| .....uacaagagaacugaucagugcu.....                                                                             | 6 | 0 | c4t |
| .....uacaagagaacugaucagugcug.....                                                                            | 1 | 0 | c4t |
| .....acaagagaacugaucagugc.....                                                                               | 1 | 0 | c4t |
| .....acaagagaacugaucagugcu.....                                                                              | 7 | 0 | c4t |
| .....acaagagaacugaucagugcug.....                                                                             | 1 | 0 | c4t |

Mature

Star

ugucaaaaaucaagcgauacaagagaaucagucgugaaguaauguccucacuggucgucucuuuacacaagaugagucuaaaagcuaauuucuaucuaucuuug

|                                      |    |   |     |
|--------------------------------------|----|---|-----|
| .....gaacugaucagucgugaagu.....       | 2  | 0 | hil |
| .....acugaucagucgugaagu.....         | 2  | 0 | hil |
| .....uacaagagaacugaucagucgug.....    | 1  | 0 | pob |
| .....uacaagagaacugaucagucguga.....   | 1  | 0 | pob |
| .....uacaagagaacugaucagucgugaa.....  | 1  | 0 | pob |
| .....acaagagaacugaucagucgug.....     | 1  | 0 | pob |
| .....acaagagaacugaucagucguga.....    | 4  | 0 | pob |
| .....uacaagagaacugaucagucgug.....    | 1  | 0 | peb |
| .....acaagagaacugaucagucgug.....     | 1  | 0 | peb |
| .....ucacuggucgucucuuuc.....         | 1  | 0 | peb |
| .....uacaagagaacugaucagucgugU.....   | 1  | 1 | Tp1 |
| .....uacaagagaacugaucagucguc.....    | 3  | 0 | bac |
| .....uacaagagaacugaucagucgug.....    | 3  | 0 | bac |
| .....acaagagaacugaucagucguc.....     | 7  | 0 | bac |
| .....acaagagaacugaucagucgug.....     | 1  | 0 | bac |
| .....ucacuggucgucucuuuac.....        | 1  | 0 | bac |
| .....uacaagagaacugaucagucguga.....   | 2  | 0 | 3Ta |
| .....uacaagagaacugaucagucg.....      | 1  | 0 | sp1 |
| .....uacaagagaacugaucagucgug.....    | 1  | 0 | sp1 |
| .....uacaagagaacugaucagucguga.....   | 5  | 0 | sp1 |
| .....acaagagaacugaucagucgug.....     | 13 | 0 | sp1 |
| .....acaagagaacugaucagucguga.....    | 2  | 0 | sp1 |
| .....acaagagaacugaucagucgugaa.....   | 1  | 0 | sp1 |
| .....acaagagaacugaucagucgugaagu..... | 1  | 0 | sp1 |
| .....uacaagagaacugaucagucgug.....    | 1  | 0 | ool |
| .....uacaagagaacugaucagucgug.....    | 2  | 0 | li1 |
| .....acaagagaacugaucagucgug.....     | 3  | 0 | li1 |
| .....acaagagaacugaucagucgug.....     | 1  | 0 | bm1 |
| .....auacaagagaacugaucagucg.....     | 1  | 0 | th2 |
| .....uacaagagaacugaucagucg.....      | 1  | 0 | th2 |
| .....uacaagagaacugaucagucguc.....    | 10 | 0 | th2 |
| .....uacaagagaacugaucagucgug.....    | 1  | 0 | th2 |
| .....uacaagagaacugaucagucguga.....   | 1  | 0 | th2 |
| .....uacaagagaacugaucagucgugaa.....  | 2  | 0 | th2 |
| .....acaagagaacugaucagug.....        | 1  | 0 | th2 |
| .....acaagagaacugaucagucg.....       | 2  | 0 | th2 |
| .....acaagagaacugaucagucguc.....     | 11 | 0 | th2 |
| .....uacaagagaacugaucagucguc.....    | 1  | 0 | sg1 |
| .....uacaagagaacugaucagucgug.....    | 1  | 0 | sg1 |
| .....acaagagaacugaucagucguc.....     | 1  | 0 | sg1 |
| .....uacaagagaacugaucagug.....       | 1  | 0 | nt4 |
| .....uacaagagaacugaucagucg.....      | 1  | 0 | nt4 |
| .....acaagagaacugaucagucgug.....     | 3  | 0 | nt4 |
| .....acaagagaacugaucagucguga.....    | 2  | 0 | nt4 |
| .....ucacuggucgucucuuuacaaa.....     | 1  | 0 | nt4 |
| .....uacaagagaacugaucagucguga.....   | 1  | 0 | Tm1 |
| .....acaagagaacugaucagucguga.....    | 1  | 0 | Tm1 |
| .....acaagagaacugaucagucgugU.....    | 1  | 1 | Tm1 |
| .....agagaacugaucagucguga.....       | 1  | 0 | Tm1 |
| .....uacaagagaacugaucagucg.....      | 1  | 0 | mm3 |
| .....uacaagagaacugaucagucg.....      | 1  | 0 | th7 |
| .....uacaagagaacugaucagucguc.....    | 3  | 0 | th7 |
| .....acaagagaacugaucagucguc.....     | 2  | 0 | th7 |
| .....agagaacugaucagucgugaagu.....    | 1  | 0 | cx1 |

**Mature**

**Star**

|                                                                                                                                |   |   |     |
|--------------------------------------------------------------------------------------------------------------------------------|---|---|-----|
| ugucaaaaaucaagcgaau <b>acaagagaacugaucagugcugaaguaa</b> uguccuacacuggucgcucucuuu <b>ca</b> aagaaugagucaaaagcuaauuuucucauaucaug |   |   |     |
| .....gaacugaucagugcugaagu.....                                                                                                 | 3 | 0 | cx1 |
| .....acugaucagugcugaagu.....                                                                                                   | 3 | 0 | cx1 |
| .....uacaagagaacugaucagugcu.....                                                                                               | 1 | 0 | nct |
| .....acaagagaacugaucagugc.....                                                                                                 | 2 | 0 | nct |
| .....acaagagaacugaucagugcu.....                                                                                                | 3 | 0 | nct |
| .....acaagagaacugaucagugcug.....                                                                                               | 1 | 0 | nct |
| .....ucacuggucgcucucuuuca.....                                                                                                 | 1 | 0 | nct |







**Mature**

**Star**

caucuccuuaaaggcuuugaugcagugcccuauuuagaaaugguacugaugugaaauaaaaauugaucagggccuuucugaguaaggcuuaccaccuucuacguuu

Provisional ID : chrX\_47993  
 Score total : 153.9  
 Score for star read(s) : 3.9  
 Score for read counts : 143.4  
 Score for mfe : 2  
 Score for randfold : 1.6  
 Score for cons. seed : 3  
 Total read count : 293  
 Mature read count : 289  
 Loop read count : 0  
 Star read count : 4

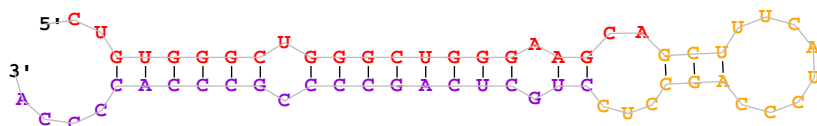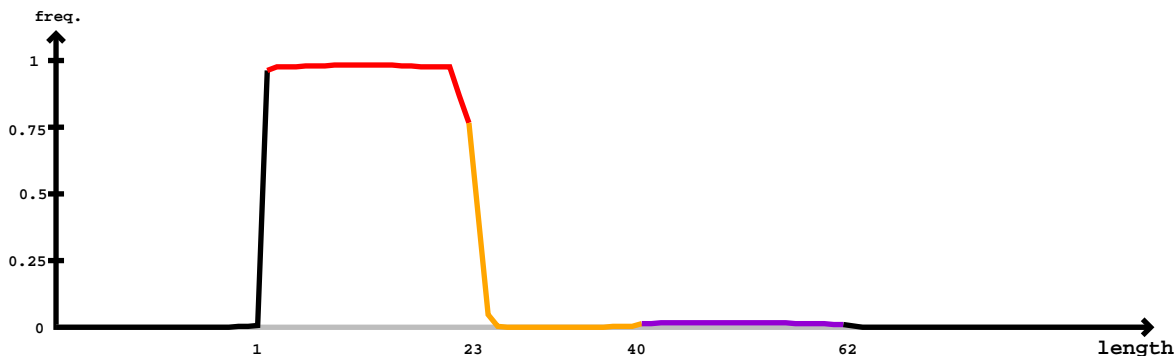

**Mature** **Star**

| 5' -                                                                            | obs   | mm | sample |
|---------------------------------------------------------------------------------|-------|----|--------|
| cgaaccaaaagacggugagugcugugggcugggcugggaagcagcuuucacuccagcucugcucagccccgccacccca | reads | mm | sample |
| cgaaccaaaagacggugagugcugugggcugggcugggaagcagcuuucacuccagcucugcucagccccgccacccca | 1     | 0  | sp1    |
| .....cugugggcugggcugggaagc.....                                                 | 1     | 1  | 3T3    |
| .....cugugggcugggcugggaagU.....                                                 | 2     | 1  | 3T3    |
| .....cugugggcugggcugggaag.....                                                  | 5     | 0  | 3T3    |
| .....cugugggcugggcugggaagU.....                                                 | 2     | 1  | 3T3    |
| .....cugugggcugggcugggaagc.....                                                 | 5     | 0  | 3T3    |
| .....cugugggcugggcugggaagA.....                                                 | 3     | 1  | 3T3    |
| .....cugugggcugggcugggaagGa.....                                                | 1     | 1  | 3T3    |
| .....cugugggcugggcugggaagca.....                                                | 12    | 0  | 3T3    |
| .....cugugggcugggcugggaagcaU.....                                               | 4     | 1  | 3T3    |
| .....cugugggcugggcugggaagcaA.....                                               | 2     | 1  | 3T3    |
| .....ugugggcugggcugggaagca.....                                                 | 2     | 0  | 3T3    |
| .....cugugggcugggcugggaagU.....                                                 | 7     | 1  | 3T3    |
| .....cugugggcugggcuggggCag.....                                                 | 1     | 1  | 3T3    |
| .....cugugggcugggcugggaag.....                                                  | 14    | 0  | 3T3    |
| .....cugugggcugggcugggaagA.....                                                 | 1     | 1  | 3T3    |
| .....cugugggcugggcugggaagc.....                                                 | 17    | 0  | 3T3    |
| .....cugugggcugggcugggaagc.....                                                 | 1     | 1  | 3T3    |
| .....cugugggUugggcugggaagca.....                                                | 1     | 1  | 3T3    |
| .....cugugggcugggcugggaagAa.....                                                | 3     | 1  | 3T3    |
| .....cugugggcugggcugggaagCca.....                                               | 1     | 1  | 3T3    |
| .....cugugggcugggAugggaagca.....                                                | 1     | 1  | 3T3    |
| .....cugugggcugggcugggaagcU.....                                                | 7     | 1  | 3T3    |
| .....cugugggcugggcugggaagCgca.....                                              | 1     | 1  | 3T3    |
| .....cugugggcugggcugggaagca.....                                                | 106   | 0  | 3T3    |
| .....cugugggcugggcugggaagcC.....                                                | 1     | 1  | 3T3    |
| .....cugugggcugggcuggggCagca.....                                               | 1     | 1  | 3T3    |
| .....Nugugggcugggcugggaagcag.....                                               | 1     | 1  | 3T3    |
| .....cugugggcugggcugggaagcag.....                                               | 1     | 1  | 3T3    |
| .....cugugggcugggcuggggCagcag.....                                              | 1     | 1  | 3T3    |
| .....cugugggcugggcugggaagcag.....                                               | 9     | 0  | 3T3    |

Mature

Star

|                                                                                                                        |    |   |     |
|------------------------------------------------------------------------------------------------------------------------|----|---|-----|
| cgaaccaagacggugagugcugugggcugggcugggaagcagcuuuc <u>cauccagccuc</u> cugcucagccccgccccccccccccccccccuucgcccucggccuaaggua |    |   |     |
| .....cugugggcugggcugggaagcaU.....                                                                                      | 25 | 1 | 3T3 |
| .....cugugggcugggcugggaagcaA.....                                                                                      | 26 | 1 | 3T3 |
| .....cugugggcugggcugggaagcagU.....                                                                                     | 8  | 1 | 3T3 |
| .....cugugggcugggcugggaagcagA.....                                                                                     | 5  | 1 | 3T3 |
| .....ugugggcugggcugggaagca.....                                                                                        | 2  | 0 | 3T3 |
| .....cugcucagccccgcccccccc.....                                                                                        | 3  | 0 | 3T3 |
| .....gcuCuggggcugggcugg.....                                                                                           | 1  | 1 | li1 |
| .....cugugggcugggcugggaagca.....                                                                                       | 1  | 0 | bm2 |
| .....gugcugugggcugggcu.....                                                                                            | 1  | 0 | mE8 |
| .....cugugggcugggcugggaagca.....                                                                                       | 1  | 0 | h12 |
| .....cuccugcucagccccAccc.....                                                                                          | 1  | 1 | t11 |
| .....cugugggcugggcugggaag.....                                                                                         | 1  | 0 | c4t |
| .....gggcugggcugggaagGa.....                                                                                           | 1  | 1 | gc2 |
| .....gcucagccccgcUcacc.....                                                                                            | 1  | 1 | h1c |
| .....cugggcAgggaagcagcu.....                                                                                           | 1  | 1 | bac |
| .....cugugggcugggcugggaagcag.....                                                                                      | 1  | 0 | sp2 |
| .....cugugggcugggcugggCag.....                                                                                         | 1  | 1 | h11 |

## Supplemental references

1. **Babiarz, J.E., Ruby, J.G., Wang, Y., Bartel, D.P. and Blelloch, R. (2008) Mouse ES cells express endogenous shRNAs, siRNAs, and other Microprocessor-independent, Dicer-dependent small RNAs. *Genes & development*, 22, 2773-2785.**
2. **Leung, A.K., Young, A.G., Bhutkar, A., Zheng, G.X., Bosson, A.D., Nielsen, C.B. and Sharp, P.A. (2011) Genome-wide identification of Ago2 binding sites from mouse embryonic stem cells with and without mature microRNAs. *Nature structural & molecular biology*, 18, 237-244.**
3. **Cheloufi, S., Dos Santos, C.O., Chong, M.M. and Hannon, G.J. (2010) A dicer-independent miRNA biogenesis pathway that requires Ago catalysis. *Nature*, 465, 584-589.**
